# Supplementary material for: Mobilome of Brevibacterium aurantiacum Sheds Light on Its Genetic Diversity and Its Adaptation to Smear-Ripened Cheeses
Source: Front Microbiol. 2019 Jun 10;10:1270. doi: 10.3389/fmicb.2019.01270 (PMC6579920; doi:10.3389/fmicb.2019.01270)
Supplement: Supplementary file 1 [file Table_1.XLSX]

## Sheet: Supplementary Table S1 (A)
Supplementary Table S1 Functional classification of B. aurantiacum orphan genes. List of all orphan genes with genomes, locus tag identifiers, genomic positions, predicted function, and subsystem category assigned by RAST.
Supplementary Table S1 (A) ORFans RAST classification
RAST subsystem category	Feature.ID	Locus tag	V1	Genome	V4	Type	Contig	Start	Stop	Frame	Strand	Length..bp.	Function	Subsystem
Amino Acids and Derivatives	fig|1703.46.peg.2067	CIK79_RS10770	9	CIK79	647229	CDS	NZ_NRGX01000001	2406444	2407634	3	+	1191	3-ketoacyl-CoA thiolase (EC 2.3.1.16) @ Acetyl-CoA acetyltransferase (EC 2.3.1.9)	Acetyl-CoA fermentation to Butyrate; <br>Biotin biosynthesis; <br>Biotin synthesis cluster; <br>Butanol Biosynthesis; <br>Butyrate metabolism cluster; <br>CBSS-246196.1.peg.364; <br>Fatty acid metabolism cluster; <br>Isoleucine degradation; <br>Isoprenoid Biosynthesis; <br>Polyhydroxybutyrate metabolism; <br>Polyhydroxybutyrate metabolism; <br>Serine-glyoxylate cycle; <br>Serine-glyoxylate cycle
Amino Acids and Derivatives	fig|273384.26.peg.3369	CXR23_17840	10	CXR23	3863353	CDS	CP025330	3864162	3863353	-3	-	810	Aminodeoxychorismate lyase (EC 4.1.3.38) / Branched-chain amino acid aminotransferase	Chorismate: Intermediate for synthesis of Tryptophan, PAPA antibiotics, PABA, 3-hydroxyanthranilate and more.; <br>Folate Biosynthesis; <br>Folate Biosynthesis, archaeal; <br>Tryptophan synthesis
Amino Acids and Derivatives	fig|273384.16.peg.1812	BAURA63_01839	2	BAURA63	168856	CDS	FXYZ01000006	169560	168856	-3	-	705	Arginine/ornithine antiporter ArcD	Arginine Deiminase Pathway; <br>Arginine and Ornithine Degradation; <br>Polyamine Metabolism
Amino Acids and Derivatives	fig|273384.26.peg.1463	CXR23_07800	10	CXR23	1665460	CDS	CP025330	1666902	1665460	-3	-	1443	Arginine/ornithine antiporter ArcD	Arginine Deiminase Pathway; <br>Arginine and Ornithine Degradation; <br>Polyamine Metabolism
Amino Acids and Derivatives	fig|1703.46.peg.46	CIK79_RS00230	9	CIK79	2609267	CDS	NZ_NRGX01000001	57868	59697	1	+	1830	Asparagine synthetase [glutamine-hydrolyzing] (EC 6.3.5.4)	Cyanophycin Metabolism; <br>Glutamate and Aspartate uptake in Bacteria; <br>Glutamine, Glutamate, Aspartate and Asparagine Biosynthesis
Amino Acids and Derivatives	fig|273384.25.peg.2284	CXR27_12025	5	CXR27	2597665	CDS	CP025334	2599497	2597665	-3	-	1833	Asparagine synthetase [glutamine-hydrolyzing] (EC 6.3.5.4)	Cyanophycin Metabolism; <br>Glutamate and Aspartate uptake in Bacteria; <br>Glutamine, Glutamate, Aspartate and Asparagine Biosynthesis
Amino Acids and Derivatives	fig|273384.15.peg.1067	BAURA86_01085	6	BAURA86	546735	CDS	FXZI01000002	547895	546735	-2	-	1161	Aspartate aminotransferase (EC 2.6.1.1)	CBSS-216591.1.peg.168; <br>Glutamine, Glutamate, Aspartate and Asparagine Biosynthesis; <br>Threonine and Homoserine Biosynthesis
Amino Acids and Derivatives	fig|1703.46.peg.2018	CIK79_RS10510	9	CIK79	593135	CDS	NZ_NRGX01000001	2352350	2353402	2	+	1053	Cyanophycin synthase (EC 6.3.2.29)(EC 6.3.2.30)	Cyanophycin Metabolism
Amino Acids and Derivatives	fig|273384.25.peg.526	CXR27_02745	5	CXR27	615658	CDS	CP025334	615658	616989	1	+	1332	Cyanophycin synthase (EC 6.3.2.29)(EC 6.3.2.30)	Cyanophycin Metabolism
Amino Acids and Derivatives	fig|273384.22.peg.3557	CXR24_18640	3	CXR24	4093067	CDS	CP025331	4094254	4093067	-1	-	1188	Cystathionine beta-lyase, type II (EC 4.4.1.8)	Methionine Biosynthesis
Amino Acids and Derivatives	fig|1703.46.peg.1211	CIK79_RS06330	9	CIK79	3977285	CDS	NZ_NRGX01000001	1425886	1427109	1	+	1224	Diaminopimelate decarboxylase (EC 4.1.1.20)	Lysine Biosynthesis DAP Pathway; <br>Lysine Biosynthesis DAP Pathway, GJO scratch
Amino Acids and Derivatives	fig|273384.17.peg.3345	BAUR920_03392	8	BAUR920	25786	CDS	FXZG01000030	25786	27513	1	+	1728	Dihydroxy-acid dehydratase (EC 4.2.1.9)	Branched-Chain Amino Acid Biosynthesis
Amino Acids and Derivatives	fig|1703.46.peg.2069	CIK79_RS10780	9	CIK79	650150	CDS	NZ_NRGX01000001	2409365	2410183	2	+	819	Enoyl-CoA hydratase (EC 4.2.1.17)	Acetyl-CoA fermentation to Butyrate; <br>Butanol Biosynthesis; <br>Butyrate metabolism cluster; <br>Fatty acid metabolism cluster; <br>Isoleucine degradation; <br>Polyhydroxybutyrate metabolism; <br>Valine degradation
Amino Acids and Derivatives	fig|273384.15.peg.4086	BAURA86_04143	6	BAURA86	1	CDS	FXZI01000094	1	585	1	+	585	Gamma-glutamyl phosphate reductase (EC 1.2.1.41)	Proline Synthesis
Amino Acids and Derivatives	fig|273384.16.peg.3780	BAURA63_03837	2	BAURA63	2	CDS	FXYZ01000072	2	1399	2	+	1398	Glutamine synthetase type I (EC 6.3.1.2)	Ammonia assimilation; <br>Glutamine, Glutamate, Aspartate and Asparagine Biosynthesis; <br>Glutamine synthetases; <br>Peptidoglycan Biosynthesis
Amino Acids and Derivatives	fig|273384.17.peg.3324	BAUR920_03371	8	BAUR920	7375	CDS	FXZG01000030	7375	8292	1	+	918	Hydroxymethylglutaryl-CoA lyase (EC 4.1.3.4)	Leucine Degradation and HMG-CoA Metabolism
Amino Acids and Derivatives	fig|273384.26.peg.2815	CXR23_14965	10	CXR23	3235771	CDS	CP025330	3236388	3235771	-3	-	618	Isochorismatase (EC 3.3.2.1)	Chorismate: Intermediate for synthesis of Tryptophan, PAPA antibiotics, PABA, 3-hydroxyanthranilate and more.
Amino Acids and Derivatives	fig|273384.17.peg.3321	BAUR920_03368	8	BAUR920	4230	CDS	FXZG01000030	5552	4230	-2	-	1323	L-Proline/Glycine betaine transporter ProP	Proline, 4-hydroxyproline uptake and utilization
Amino Acids and Derivatives	fig|273384.17.peg.1724	BAUR920_01752	8	BAUR920	8880	CDS	FXZG01000009	10211	8880	-2	-	1332	L-Proline/Glycine betaine transporter ProP	Proline, 4-hydroxyproline uptake and utilization
Amino Acids and Derivatives	fig|273384.17.peg.390	BAUR920_00400	8	BAUR920	108636	CDS	FXZG01000002	110051	108636	-2	-	1416	L-Proline/Glycine betaine transporter ProP	Proline, 4-hydroxyproline uptake and utilization
Amino Acids and Derivatives	fig|273384.16.peg.513	BAURA63_00520	2	BAURA63	7152	CDS	FXYZ01000002	8447	7152	-2	-	1296	L-Proline/Glycine betaine transporter ProP	Proline, 4-hydroxyproline uptake and utilization
Amino Acids and Derivatives	fig|273384.15.peg.2042	BAURA86_02076	6	BAURA86	216834	CDS	FXZI01000006	216834	218159	3	+	1326	L-Proline/Glycine betaine transporter ProP	Proline, 4-hydroxyproline uptake and utilization
Amino Acids and Derivatives	fig|273384.20.peg.2874	CXR25_15010	7	CXR25	3233336	CDS	CP025333	3233336	3234403	2	+	1068	L-Proline/Glycine betaine transporter ProP	Proline, 4-hydroxyproline uptake and utilization
Amino Acids and Derivatives	fig|273384.22.peg.3560	CXR24_18655	3	CXR24	4096052	CDS	CP025331	4097062	4096052	-1	-	1011	Lysine-arginine-ornithine-binding periplasmic protein precursor (TC 3.A.1.3.1)	Arginine and Ornithine Degradation
Amino Acids and Derivatives	fig|273384.17.peg.3318	BAUR920_03365	8	BAUR920	1421	CDS	FXZG01000030	2110	1421	-1	-	690	N-carbamoylsarcosine amidase (EC 3.5.1.59)	Creatine and Creatinine Degradation
Amino Acids and Derivatives	fig|273384.15.peg.3604	BAURA86_03653	6	BAURA86	22882	CDS	FXZI01000019	23823	22882	-3	-	942	Ornithine cyclodeaminase (EC 4.3.1.12)	Arginine and Ornithine Degradation
Amino Acids and Derivatives	fig|273384.17.peg.3330	BAUR920_03377	8	BAUR920	12576	CDS	FXZG01000030	14093	12576	-2	-	1518	Proline/sodium symporter PutP (TC 2.A.21.2.1) @ Propionate/sodium symporter	Proline, 4-hydroxyproline uptake and utilization
Amino Acids and Derivatives	fig|273384.15.peg.2617	BAURA86_02657	6	BAURA86	3410	CDS	FXZI01000010	3410	4753	2	+	1344	Putrescine importer	Putrescine utilization pathways
Amino Acids and Derivatives	fig|273384.15.peg.2782	BAURA86_02822	6	BAURA86	6281	CDS	FXZI01000011	6281	7300	2	+	1020	Threonine dehydratase (EC 4.3.1.19)	Branched-Chain Amino Acid Biosynthesis; <br>Threonine degradation
Amino Acids and Derivatives	fig|273384.19.peg.3565	BAUR9175_03615	1	BAUR9175	15409	CDS	FXZB01000039	16539	15409	-3	-	1131	Threonine dehydrogenase and related Zn-dependent dehydrogenases	Threonine degradation
Amino Acids and Derivatives	fig|273384.21.peg.3150	CXR26_16520	4	CXR26	3568613	CDS	CP025332	3568613	3569806	2	+	1194	Threonine dehydrogenase and related Zn-dependent dehydrogenases	Threonine degradation
Amino Acids and Derivatives	fig|273384.19.peg.3148	BAUR9175_03193	1	BAUR9175	5833	CDS	FXZB01000026	5833	7233	1	+	1401	Transcriptional regulator, GntR family domain / Aspartate aminotransferase (EC 2.6.1.1)	CBSS-216591.1.peg.168; <br>Glutamine, Glutamate, Aspartate and Asparagine Biosynthesis; <br>Threonine and Homoserine Biosynthesis
Amino Acids and Derivatives	fig|273384.22.peg.3198	CXR24_16755	3	CXR24	3656068	CDS	CP025331	3656742	3656068	-3	-	675	Urease accessory protein UreF	G3E family of P-loop GTPases (metallocenter biosynthesis); <br>Urea decomposition; <br>Urease subunits
Amino Acids and Derivatives	fig|273384.22.peg.3197	CXR24_16750	3	CXR24	3655323	CDS	CP025331	3656075	3655323	-2	-	753	Urease accessory protein UreG	G3E family of P-loop GTPases (metallocenter biosynthesis); <br>Urea decomposition; <br>Urease subunits
Amino Acids and Derivatives	fig|273384.22.peg.3199	CXR24_16760	3	CXR24	3656769	CDS	CP025331	3658472	3656769	-2	-	1704	Urease alpha subunit (EC 3.5.1.5)	G3E family of P-loop GTPases (metallocenter biosynthesis); <br>Urea decomposition; <br>Urease subunits
Amino Acids and Derivatives	fig|273384.22.peg.3200	CXR24_16765	3	CXR24	3658472	CDS	CP025331	3658909	3658472	-1	-	438	Urease beta subunit (EC 3.5.1.5)	G3E family of P-loop GTPases (metallocenter biosynthesis); <br>Urea decomposition; <br>Urease subunits
Amino Acids and Derivatives	fig|273384.22.peg.3201	CXR24_16770	3	CXR24	3658921	CDS	CP025331	3659223	3658921	-3	-	303	Urease gamma subunit (EC 3.5.1.5)	G3E family of P-loop GTPases (metallocenter biosynthesis); <br>Urea decomposition; <br>Urease subunits
Carbohydrates	fig|273384.16.peg.2372	BAURA63_02406	2	BAURA63	119652	CDS	FXYZ01000009	121055	119652	-2	-	1404	2-methylcitrate dehydratase (EC 4.2.1.79)	Methylcitrate cycle; <br>Propionate-CoA to Succinate Module
Carbohydrates	fig|273384.17.peg.3336	BAUR920_03383	8	BAUR920	17352	CDS	FXZG01000030	17352	18977	3	+	1626	Acetyl-coenzyme A synthetase (EC 6.2.1.1)	Pyruvate metabolism II: acetyl-CoA, acetogenesis from pyruvate
Carbohydrates	fig|273384.19.peg.2112	BAUR9175_02142	1	BAUR9175	118749	CDS	FXZB01000013	118749	120491	3	+	1743	Aconitate hydratase (EC 4.2.1.3)	Glyoxylate bypass; <br>Propionate-CoA to Succinate Module; <br>Serine-glyoxylate cycle; <br>TCA Cycle
Carbohydrates	fig|273384.16.peg.512	BAURA63_00519	2	BAURA63	5837	CDS	FXYZ01000002	6805	5837	-1	-	969	Alcohol dehydrogenase (EC 1.1.1.1)	5-FCL-like protein; <br>Butanol Biosynthesis; <br>Glycerolipid and Glycerophospholipid Metabolism in Bacteria
Carbohydrates	fig|273384.19.peg.3560	BAUR9175_03610	1	BAUR9175	10442	CDS	FXZB01000039	10442	11974	2	+	1533	Alpha,alpha-trehalose-phosphate synthase [UDP-forming] (EC 2.4.1.15)	Trehalose Biosynthesis
Carbohydrates	fig|1703.41.peg.2682	BLSMQ_RS13950	0	BLSMQ	3046307	CDS	NZ_CP017150	3046307	3047443	2	+	1137	D-amino acid dehydrogenase small subunit (EC 1.4.99.1)	Pyruvate Alanine Serine Interconversions; <br>Respiratory dehydrogenases 1
Carbohydrates	fig|273384.17.peg.1425	BAUR920_01452	8	BAUR920	192861	CDS	FXZG01000006	192861	193613	3	+	753	D-galactonate transporter	D-galactonate catabolism
Carbohydrates	fig|273384.20.peg.2640	CXR25_13825	7	CXR25	2974945	CDS	CP025333	2975724	2974945	-3	-	780	Glycerophosphoryl diester phosphodiesterase (EC 3.1.4.46)	CBSS-176299.4.peg.1996A; <br>Glycerol and Glycerol-3-phosphate Uptake and Utilization
Carbohydrates	fig|273384.16.peg.2608	BAURA63_02646	2	BAURA63	89198	CDS	FXYZ01000011	90244	89198	-1	-	1047	Glycolate dehydrogenase (EC 1.1.99.14), subunit GlcD	Glycolate, glyoxylate interconversions
Carbohydrates	fig|273384.17.peg.3343	BAUR920_03390	8	BAUR920	23528	CDS	FXZG01000030	23528	24973	2	+	1446	Low-affinity gluconate/H+ symporter GntU	D-gluconate and ketogluconates metabolism
Carbohydrates	fig|1703.46.peg.68	CIK79_RS00345	9	CIK79	2635454	CDS	NZ_NRGX01000001	84055	85224	1	+	1170	Phosphoenolpyruvate synthase (EC 2.7.9.2)	Glycolysis and Gluconeogenesis; <br>Pyruvate metabolism I: anaplerotic reactions, PEP
Carbohydrates	fig|273384.15.peg.4035	BAURA86_04092	6	BAURA86	3	CDS	FXZI01000069	356	3	-2	-	354	Purine nucleoside phosphorylase (EC 2.4.2.1)	Adenosyl nucleosidases; <br>Deoxyribose and Deoxynucleoside Catabolism; <br>Purine conversions; <br>pyrimidine conversions
Carbohydrates	fig|273384.19.peg.3557	BAUR9175_03607	1	BAUR9175	6565	CDS	FXZB01000039	8367	6565	-3	-	1803	Pyruvate oxidase (EC 1.2.3.3)	Pyruvate metabolism II: acetyl-CoA, acetogenesis from pyruvate
Carbohydrates	fig|273384.26.peg.2608	CXR23_13870	10	CXR23	2984519	CDS	CP025330	2984519	2986105	2	+	1587	Ribose ABC transport system, ATP-binding protein RbsA (TC 3.A.1.2.1)	D-ribose utilization
Carbohydrates	fig|273384.26.peg.2607	CXR23_13865	10	CXR23	2983462	CDS	CP025330	2983462	2984550	1	+	1089	Ribose ABC transport system, periplasmic ribose-binding protein RbsB (TC 3.A.1.2.1)	D-ribose utilization
Carbohydrates	fig|273384.26.peg.2609	CXR23_13875	10	CXR23	2986102	CDS	CP025330	2986102	2987070	1	+	969	Ribose ABC transport system, permease protein RbsC (TC 3.A.1.2.1)	D-ribose utilization
Carbohydrates	fig|273384.26.peg.2610	CXR23_13880	10	CXR23	2987067	CDS	CP025330	2987067	2988215	3	+	1149	Ribose ABC transport system, permease protein RbsC (TC 3.A.1.2.1)	D-ribose utilization
Carbohydrates	fig|273384.15.peg.587	BAURA86_00599	6	BAURA86	21373	CDS	FXZI01000002	21373	22416	1	+	1044	UDP-glucose 4-epimerase (EC 5.1.3.2)	Lactose and Galactose Uptake and Utilization
Carbohydrates	fig|273384.26.peg.2778	CXR23_14765	10	CXR23	3187768	CDS	CP025330	3187768	3188904	1	+	1137	UDP-glucose 4-epimerase (EC 5.1.3.2)	Lactose and Galactose Uptake and Utilization; <br>N-linked Glycosylation in Bacteria
Cell Division and Cell Cycle	fig|273384.16.peg.3122	BAURA63_03171	2	BAURA63	48082	CDS	FXYZ01000017	48082	50193	1	+	2112	Cell division protein FtsK	Bacterial Cell Division; <br>Bacterial Cytoskeleton; <br>Bacterial RNA-metabolizing Zn-dependent hydrolases
Cell Division and Cell Cycle	fig|273384.15.peg.4037	BAURA86_04094	6	BAURA86	1041	CDS	FXZI01000069	1253	1041	-2	-	213	Cell division protein FtsK	Bacterial Cell Division; <br>Bacterial Cytoskeleton; <br>Bacterial RNA-metabolizing Zn-dependent hydrolases
Cell Division and Cell Cycle	fig|273384.15.peg.1617	BAURA86_01644	6	BAURA86	243323	CDS	FXZI01000004	243323	245203	2	+	1881	Cell division protein FtsK	Bacterial Cell Division; <br>Bacterial Cytoskeleton; <br>Bacterial RNA-metabolizing Zn-dependent hydrolases
Cell Division and Cell Cycle	fig|273384.16.peg.3112	BAURA63_03161	2	BAURA63	36386	CDS	FXYZ01000017	37285	36386	-1	-	900	Chromosome (plasmid) partitioning protein ParA	Bacterial Cell Division; <br>Bacterial Cytoskeleton; <br>RNA modification and chromosome partitioning cluster; <br>Ribosome post-transcriptional modification and chromosomal segregation cluster
Cell Division and Cell Cycle	fig|273384.15.peg.1766	BAURA86_01794	6	BAURA86	157727	CDS	FXZI01000005	157727	158746	2	+	1020	Chromosome (plasmid) partitioning protein ParB	Bacterial Cytoskeleton; <br>RNA modification and chromosome partitioning cluster
Cell Division and Cell Cycle	fig|273384.15.peg.877	BAURA86_00892	6	BAURA86	326210	CDS	FXZI01000002	327238	326210	-1	-	1029	Chromosome (plasmid) partitioning protein ParB	Bacterial Cytoskeleton; <br>RNA modification and chromosome partitioning cluster
Cell Division and Cell Cycle	fig|273384.15.peg.478	BAURA86_00489	6	BAURA86	534805	CDS	FXZI01000001	534805	535785	1	+	981	Chromosome (plasmid) partitioning protein ParB	Bacterial Cytoskeleton; <br>RNA modification and chromosome partitioning cluster
Cell Division and Cell Cycle	fig|1703.46.peg.1645	CIK79_RS08595	9	CIK79	166967	CDS	NZ_NRGX01000001	1927270	1926182	-1	-	1089	Chromosome (plasmid) partitioning protein ParB	Bacterial Cytoskeleton; <br>RNA modification and chromosome partitioning cluster
Cell Division and Cell Cycle	fig|1703.46.peg.41	CIK79_RS00205	9	CIK79	2603920	CDS	NZ_NRGX01000001	53774	52521	-2	-	1254	Chromosome (plasmid) partitioning protein ParB	Bacterial Cytoskeleton; <br>RNA modification and chromosome partitioning cluster
Cell Division and Cell Cycle	fig|273384.26.peg.2812	CXR23_14945	10	CXR23	3230506	CDS	CP025330	3230506	3231525	1	+	1020	Chromosome (plasmid) partitioning protein ParB	Bacterial Cytoskeleton; <br>RNA modification and chromosome partitioning cluster
Cell Division and Cell Cycle	fig|273384.26.peg.3334	CXR23_17660	10	CXR23	3828641	CDS	CP025330	3829708	3828641	-1	-	1068	Chromosome (plasmid) partitioning protein ParB	Bacterial Cytoskeleton; <br>RNA modification and chromosome partitioning cluster
Cell Division and Cell Cycle	fig|273384.25.peg.2793	CXR27_14730	5	CXR27	3219502	CDS	CP025334	3219502	3220578	1	+	1077	Chromosome (plasmid) partitioning protein ParB	Bacterial Cytoskeleton; <br>RNA modification and chromosome partitioning cluster
Cell Division and Cell Cycle	fig|273384.17.peg.3487	BAUR920_03535	8	BAUR920	12596	CDS	FXZG01000037	12596	13576	2	+	981	Chromosome (plasmid) partitioning protein ParB / Stage 0 sporulation protein J	Bacterial Cytoskeleton; <br>Bacterial Cytoskeleton; <br>RNA modification and chromosome partitioning cluster
Cell Wall and Capsule	fig|273384.26.peg.3056	CXR23_16220	10	CXR23	3525442	CDS	CP025330	3526872	3525442	-3	-	1431	2-C-methyl-D-erythritol 4-phosphate cytidylyltransferase (EC 2.7.7.60)	Isoprenoid Biosynthesis; <br>Nonmevalonate Branch of Isoprenoid Biosynthesis; <br>Stationary phase repair cluster; <br>Teichoic and lipoteichoic acids biosynthesis
Cell Wall and Capsule	fig|273384.17.peg.1721	BAUR920_01749	8	BAUR920	2953	CDS	FXZG01000009	5484	2953	-3	-	2532	CDP-glycerol: N-acetyl-beta-D-mannosaminyl-1,4-N-acetyl-D-glucosaminyldiphosphoundecaprenyl glycerophosphotransferase	Teichoic and lipoteichoic acids biosynthesis
Cell Wall and Capsule	fig|273384.19.peg.3700	BAUR9175_03750	1	BAUR9175	5582	CDS	FXZB01000047	5582	7354	2	+	1773	CDP-glycerol:poly(glycerophosphate) glycerophosphotransferase (EC 2.7.8.12)	Teichoic and lipoteichoic acids biosynthesis
Cell Wall and Capsule	fig|273384.17.peg.1720	BAUR920_01748	8	BAUR920	456	CDS	FXZG01000009	2984	456	-2	-	2529	CDP-glycerol:poly(glycerophosphate) glycerophosphotransferase (EC 2.7.8.12)	Teichoic and lipoteichoic acids biosynthesis
Cell Wall and Capsule	fig|1703.41.peg.2976	BLSMQ_RS15475	0	BLSMQ	3374570	CDS	NZ_CP017150	3378166	3374570	-1	-	3597	CDP-glycerol:poly(glycerophosphate) glycerophosphotransferase (EC 2.7.8.12)	Teichoic and lipoteichoic acids biosynthesis
Cell Wall and Capsule	fig|273384.17.peg.1628	BAUR920_01656	8	BAUR920	51909	CDS	FXZG01000008	51909	52607	3	+	699	D-alanyl-D-alanine carboxypeptidase (EC 3.4.16.4)	CBSS-84588.1.peg.1247; <br>Metallocarboxypeptidases (EC 3.4.17.-); <br>Murein Hydrolases; <br>Peptidoglycan Biosynthesis
Cell Wall and Capsule	fig|273384.17.peg.1614	BAUR920_01642	8	BAUR920	29423	CDS	FXZG01000008	29423	31102	2	+	1680	Exoenzymes regulatory protein AepA in lipid-linked oligosaccharide synthesis cluster	Lipid-linked oligosaccharide synthesis related cluster
Cell Wall and Capsule	fig|273384.22.peg.493	CXR24_02590	3	CXR24	581546	CDS	CP025331	582829	581546	-1	-	1284	L-alanine-DL-glutamate epimerase	Muconate lactonizing enzyme family; <br>Recycling of Peptidoglycan Amino Acids
Cell Wall and Capsule	fig|1703.46.peg.782	CIK79_RS04090	9	CIK79	3486829	CDS	NZ_NRGX01000001	935430	936152	3	+	723	Lipoprotein releasing system ATP-binding protein LolD	Lipoprotein sorting system
Cell Wall and Capsule	fig|1703.46.peg.1218	CIK79_RS06365	9	CIK79	3985925	CDS	NZ_NRGX01000001	1435236	1434526	-3	-	711	Low molecular weight protein-tyrosine-phosphatase Wzb (EC 3.1.3.48)	Capsular Polysaccharides Biosynthesis and Assembly
Cell Wall and Capsule	fig|273384.22.peg.3315	CXR24_17375	3	CXR24	3803448	CDS	CP025331	3804263	3803448	-2	-	816	Low molecular weight protein-tyrosine-phosphatase Wzb (EC 3.1.3.48)	Capsular Polysaccharides Biosynthesis and Assembly
Cell Wall and Capsule	fig|273384.26.peg.1346	CXR23_07185	10	CXR23	1532607	CDS	CP025330	1532607	1533431	3	+	825	N-acetylmannosaminyltransferase (EC 2.4.1.187)	Teichoic and lipoteichoic acids biosynthesis
Cell Wall and Capsule	fig|273384.17.peg.3374	BAUR920_03422	8	BAUR920	754	CDS	FXZG01000032	2631	754	-3	-	1878	Poly(glycerol-phosphate) alpha-glucosyltransferase (EC 2.4.1.52)	Teichoic and lipoteichoic acids biosynthesis
Cell Wall and Capsule	fig|1703.41.peg.1955	BLSMQ_RS10150	0	BLSMQ	2188796	CDS	NZ_CP017150	2188796	2189422	2	+	627	Poly(glycerol-phosphate) alpha-glucosyltransferase (EC 2.4.1.52)	Teichoic and lipoteichoic acids biosynthesis
Cell Wall and Capsule	fig|1703.41.peg.2763	BLSMQ_RS14385	0	BLSMQ	3128807	CDS	NZ_CP017150	3128807	3130630	2	+	1824	Poly(glycerol-phosphate) alpha-glucosyltransferase (EC 2.4.1.52)	Teichoic and lipoteichoic acids biosynthesis
Cell Wall and Capsule	fig|273384.22.peg.3551	CXR24_18580	3	CXR24	4082706	CDS	CP025331	4082706	4083404	3	+	699	Transcriptional regulator NanR	Sialic Acid Metabolism
Cell Wall and Capsule	fig|273384.17.peg.1838	BAUR920_01866	8	BAUR920	147666	CDS	FXZG01000009	147666	148268	3	+	603	TsaE protein, required for threonylcarbamoyladenosine t(6)A37 formation in tRNA	YjeE
Cell Wall and Capsule	fig|1703.46.peg.1214	CIK79_RS06345	9	CIK79	3981076	CDS	NZ_NRGX01000001	1431224	1429677	-2	-	1548	Tyrosine-protein kinase Wzc (EC 2.7.10.2)	Capsular Polysaccharides Biosynthesis and Assembly
Cell Wall and Capsule	fig|273384.26.peg.2806	CXR23_14915	10	CXR23	3224630	CDS	CP025330	3224630	3225805	2	+	1176	UDP-N-acetylglucosamine 2-epimerase (EC 5.1.3.14)	CMP-N-acetylneuraminate Biosynthesis; <br>Sialic Acid Metabolism
Cell Wall and Capsule	fig|273384.17.peg.1627	BAUR920_01655	8	BAUR920	47920	CDS	FXZG01000008	47920	51786	1	+	3867	UDP-N-acetylmuramoylalanyl-D-glutamyl-2,6-diaminopimelate--D-alanyl-D-alanine ligase (EC 6.3.2.10)	Peptidoglycan Biosynthesis; <br>Peptidoglycan biosynthesis--gjo
Cell Wall and Capsule	fig|273384.17.peg.1632	BAUR920_01660	8	BAUR920	58851	CDS	FXZG01000008	60308	58851	-2	-	1458	UDP-N-acetylmuramoylalanyl-D-glutamyl-2,6-diaminopimelate--D-alanyl-D-alanine ligase (EC 6.3.2.10)	Peptidoglycan Biosynthesis; <br>Peptidoglycan biosynthesis--gjo
Cofactors, Vitamins, Prosthetic Groups, Pigments	fig|273384.19.peg.3376	BAUR9175_03421	1	BAUR9175	6205	CDS	FXZB01000032	6489	6205	-3	-	285	C-terminal domain of CinA type S	NAD and NADP cofactor biosynthesis global; <br>NAD and NADP cofactor biosynthesis global; <br>Riboflavin, FMN and FAD metabolism in plants; <br>Riboflavin synthesis cluster
DNA Metabolism	fig|273384.22.peg.2811	CXR24_14735	3	CXR24	3217258	CDS	CP025331	3217258	3217443	1	+	186	ATP-dependent DNA ligase (EC 6.5.1.1) clustered with Ku protein, LigD	Bacillus subtilis scratch - gjo; <br>DNA Repair Base Excision; <br>DNA ligases; <br>Nonhomologous End-Joining in Bacteria
DNA Metabolism	fig|1703.41.peg.2662	BLSMQ_RS13845	0	BLSMQ	3017239	CDS	NZ_CP017150	3020019	3017239	-3	-	2781	DinG family ATP-dependent helicase YoaA	DNA repair, bacterial DinG and relatives
DNA Metabolism	fig|273384.19.peg.2908	BAUR9175_02947	1	BAUR9175	75802	CDS	FXZB01000021	75802	77295	1	+	1494	DNA-cytosine methyltransferase (EC 2.1.1.37)	DNA repair, bacterial
DNA Metabolism	fig|273384.15.peg.1752	BAURA86_01780	6	BAURA86	145466	CDS	FXZI01000005	145466	146404	2	+	939	DNA-cytosine methyltransferase (EC 2.1.1.37)	DNA repair, bacterial
DNA Metabolism	fig|273384.15.peg.889	BAURA86_00904	6	BAURA86	338414	CDS	FXZI01000002	338734	338414	-1	-	321	DNA-cytosine methyltransferase (EC 2.1.1.37)	DNA repair, bacterial
DNA Metabolism	fig|273384.21.peg.242	CXR26_01285	4	CXR26	271309	CDS	CP025332	272697	271309	-3	-	1389	DNA-cytosine methyltransferase (EC 2.1.1.37)	DNA repair, bacterial
DNA Metabolism	fig|273384.26.peg.2783	CXR23_14790	10	CXR23	3193617	CDS	CP025330	3197069	3193617	-2	-	3453	Error-prone repair homolog of DNA polymerase III alpha subunit (EC 2.7.7.7)	DNA replication strays
DNA Metabolism	fig|273384.16.peg.3077	BAURA63_03126	2	BAURA63	1954	CDS	FXYZ01000017	1954	2379	1	+	426	Error-prone repair protein UmuD	DNA repair, bacterial UmuCD system
DNA Metabolism	fig|273384.16.peg.3078	BAURA63_03127	2	BAURA63	2369	CDS	FXYZ01000017	2369	2659	2	+	291	Error-prone, lesion bypass DNA polymerase V (UmuC)	DNA repair, bacterial UmuCD system
DNA Metabolism	fig|273384.16.peg.3094	BAURA63_03143	2	BAURA63	21482	CDS	FXYZ01000017	21482	22486	2	+	1005	Error-prone, lesion bypass DNA polymerase V (UmuC)	DNA repair, bacterial UmuCD system
DNA Metabolism	fig|273384.15.peg.3877	BAURA86_03930	6	BAURA86	856	CDS	FXZI01000027	3111	856	-3	-	2256	Excinuclease ABC subunit A paralog of unknown function	DNA repair, UvrABC system
DNA Metabolism	fig|273384.15.peg.3703	BAURA86_03753	6	BAURA86	45712	CDS	FXZI01000021	45712	47982	1	+	2271	Excinuclease ABC subunit A paralog of unknown function	DNA repair, UvrABC system
DNA Metabolism	fig|273384.17.peg.3486	BAUR920_03534	8	BAUR920	12042	CDS	FXZG01000037	12042	12596	3	+	555	Methyl-directed repair DNA adenine methylase (EC 2.1.1.72)	DNA repair, bacterial
DNA Metabolism	fig|273384.15.peg.1739	BAURA86_01767	6	BAURA86	130045	CDS	FXZI01000005	130800	130045	-3	-	756	Putative deoxyribonuclease similar to YcfH, type 4	CBSS-159087.4.peg.2189; <br>YcfH
DNA Metabolism	fig|273384.15.peg.901	BAURA86_00916	6	BAURA86	351462	CDS	FXZI01000002	351462	352247	3	+	786	Putative deoxyribonuclease similar to YcfH, type 4	CBSS-159087.4.peg.2189; <br>YcfH
DNA Metabolism	fig|273384.15.peg.1777	BAURA86_01805	6	BAURA86	169514	CDS	FXZI01000005	169514	169993	2	+	480	Single-stranded DNA-binding protein	DNA repair, bacterial; <br>DNA repair, bacterial RecFOR pathway
DNA Metabolism	fig|273384.20.peg.2681	CXR25_14035	7	CXR25	3008181	CDS	CP025333	3008663	3008181	-2	-	483	Single-stranded DNA-binding protein	DNA repair, bacterial; <br>DNA repair, bacterial RecFOR pathway
DNA Metabolism	fig|273384.19.peg.2941	BAUR9175_02981	1	BAUR9175	34475	CDS	FXZB01000022	36040	34475	-1	-	1566	Type I restriction-modification system, DNA-methyltransferase subunit M (EC 2.1.1.72)	Restriction-Modification System; <br>Type I Restriction-Modification
DNA Metabolism	fig|273384.16.peg.3605	BAURA63_03657	2	BAURA63	146	CDS	FXYZ01000034	1642	146	-1	-	1497	Type I restriction-modification system, DNA-methyltransferase subunit M (EC 2.1.1.72)	Restriction-Modification System; <br>Type I Restriction-Modification
DNA Metabolism	fig|273384.16.peg.814	BAURA63_00827	2	BAURA63	4580	CDS	FXYZ01000003	6550	4580	-1	-	1971	Type I restriction-modification system, DNA-methyltransferase subunit M (EC 2.1.1.72)	Restriction-Modification System; <br>Type I Restriction-Modification
DNA Metabolism	fig|273384.16.peg.2389	BAURA63_02423	2	BAURA63	136910	CDS	FXYZ01000009	137749	136910	-1	-	840	Type I restriction-modification system, DNA-methyltransferase subunit M (EC 2.1.1.72)	Restriction-Modification System; <br>Type I Restriction-Modification
DNA Metabolism	fig|273384.21.peg.2558	CXR26_13440	4	CXR26	2899830	CDS	CP025332	2899830	2901563	3	+	1734	Type I restriction-modification system, DNA-methyltransferase subunit M (EC 2.1.1.72)	Restriction-Modification System; <br>Type I Restriction-Modification
DNA Metabolism	fig|273384.19.peg.2939	BAUR9175_02979	1	BAUR9175	30166	CDS	FXZB01000022	33294	30166	-3	-	3129	Type I restriction-modification system, restriction subunit R (EC 3.1.21.3)	Restriction-Modification System; <br>Type I Restriction-Modification
DNA Metabolism	fig|273384.16.peg.812	BAURA63_00825	2	BAURA63	274	CDS	FXYZ01000003	3207	274	-3	-	2934	Type I restriction-modification system, restriction subunit R (EC 3.1.21.3)	Restriction-Modification System; <br>Type I Restriction-Modification
DNA Metabolism	fig|273384.16.peg.3608	BAURA63_03660	2	BAURA63	4230	CDS	FXYZ01000034	6998	4230	-2	-	2769	Type I restriction-modification system, restriction subunit R (EC 3.1.21.3)	Restriction-Modification System; <br>Type I Restriction-Modification
DNA Metabolism	fig|273384.21.peg.2560	CXR26_13450	4	CXR26	2902864	CDS	CP025332	2902864	2906034	1	+	3171	Type I restriction-modification system, restriction subunit R (EC 3.1.21.3)	Restriction-Modification System; <br>Type I Restriction-Modification
DNA Metabolism	fig|273384.19.peg.2940	BAUR9175_02980	1	BAUR9175	33291	CDS	FXZB01000022	34457	33291	-2	-	1167	Type I restriction-modification system, specificity subunit S (EC 3.1.21.3)	Restriction-Modification System; <br>Type I Restriction-Modification
DNA Metabolism	fig|273384.16.peg.3607	BAURA63_03659	2	BAURA63	3010	CDS	FXYZ01000034	4233	3010	-3	-	1224	Type I restriction-modification system, specificity subunit S (EC 3.1.21.3)	Restriction-Modification System; <br>Type I Restriction-Modification
DNA Metabolism	fig|273384.16.peg.813	BAURA63_00826	2	BAURA63	3210	CDS	FXYZ01000003	4580	3210	-2	-	1371	Type I restriction-modification system, specificity subunit S (EC 3.1.21.3)	Restriction-Modification System; <br>Type I Restriction-Modification
DNA Metabolism	fig|273384.16.peg.2388	BAURA63_02422	2	BAURA63	135771	CDS	FXYZ01000009	136913	135771	-2	-	1143	Type I restriction-modification system, specificity subunit S (EC 3.1.21.3)	Restriction-Modification System; <br>Type I Restriction-Modification
DNA Metabolism	fig|1703.41.peg.359	BLSMQ_RS01875	0	BLSMQ	417966	CDS	NZ_CP017150	417966	419168	3	+	1203	Type I restriction-modification system, specificity subunit S (EC 3.1.21.3)	Restriction-Modification System; <br>Type I Restriction-Modification
DNA Metabolism	fig|1703.46.peg.3517	CIK79_RS18345	9	CIK79	2263800	CDS	NZ_NRGX01000001	4023524	4023015	-2	-	510	Type I restriction-modification system, specificity subunit S (EC 3.1.21.3)	Restriction-Modification System; <br>Type I Restriction-Modification
DNA Metabolism	fig|273384.26.peg.383	CXR23_02035	10	CXR23	435994	CDS	CP025330	435994	437190	1	+	1197	Type I restriction-modification system, specificity subunit S (EC 3.1.21.3)	Restriction-Modification System; <br>Type I Restriction-Modification
DNA Metabolism	fig|273384.26.peg.748	CXR23_04000	10	CXR23	884890	CDS	CP025330	886041	884890	-3	-	1152	Type I restriction-modification system, specificity subunit S (EC 3.1.21.3)	Restriction-Modification System; <br>Type I Restriction-Modification
DNA Metabolism	fig|273384.26.peg.2096	CXR23_11165	10	CXR23	2374130	CDS	CP025330	2375332	2374130	-1	-	1203	Type I restriction-modification system, specificity subunit S (EC 3.1.21.3)	Restriction-Modification System; <br>Type I Restriction-Modification
DNA Metabolism	fig|273384.21.peg.2559	CXR26_13445	4	CXR26	2901560	CDS	CP025332	2901560	2902867	2	+	1308	Type I restriction-modification system, specificity subunit S (EC 3.1.21.3)	Restriction-Modification System; <br>Type I Restriction-Modification
DNA Metabolism	fig|273384.16.peg.3603	BAURA63_03655	2	BAURA63	13190	CDS	FXYZ01000033	13357	13190	-1	-	168	Type III restriction-modification system methylation subunit (EC 2.1.1.72)	Restriction-Modification System
DNA Metabolism	fig|273384.15.peg.1363	BAURA86_01384	6	BAURA86	329474	CDS	FXZI01000003	329474	329983	2	+	510	Type III restriction-modification system methylation subunit (EC 2.1.1.72)	Restriction-Modification System
DNA Metabolism	fig|273384.15.peg.1365	BAURA86_01386	6	BAURA86	331366	CDS	FXZI01000003	331366	332706	1	+	1341	Type III restriction-modification system methylation subunit (EC 2.1.1.72)	Restriction-Modification System
DNA Metabolism	fig|1703.41.peg.1661	BLSMQ_RS08600	0	BLSMQ	1869609	CDS	NZ_CP017150	1871708	1869609	-2	-	2100	Type III restriction-modification system methylation subunit (EC 2.1.1.72)	Restriction-Modification System
DNA Metabolism	fig|273384.22.peg.2277	CXR24_11970	3	CXR24	2595467	CDS	CP025331	2595467	2597371	2	+	1905	Type III restriction-modification system methylation subunit (EC 2.1.1.72)	Restriction-Modification System
DNA Metabolism	fig|273384.25.peg.1520	CXR27_07990	5	CXR27	1746197	CDS	CP025334	1746197	1747354	2	+	1158	Type III restriction-modification system methylation subunit (EC 2.1.1.72)	Restriction-Modification System
DNA Metabolism	fig|273384.15.peg.1366	BAURA86_01387	6	BAURA86	332710	CDS	FXZI01000003	332710	335685	1	+	2976	Type III restriction-modification system StyLTI enzyme res (EC 3.1.21.5)	Restriction-Modification System
DNA Metabolism	fig|1703.41.peg.279	BLSMQ_RS01450	0	BLSMQ	312792	CDS	NZ_CP017150	312792	313229	3	+	438	Very-short-patch mismatch repair endonuclease (G-T specific)	DNA repair, bacterial
Dormancy and Sporulation	fig|273384.15.peg.568	BAURA86_00580	6	BAURA86	3019	CDS	FXZI01000002	3019	3909	1	+	891	Cell division inhibitor	Persister Cells
Fatty Acids, Lipids, and Isoprenoids	fig|273384.19.peg.3261	BAUR9175_03306	1	BAUR9175	39080	CDS	FXZB01000028	39427	39080	-1	-	348	3-oxoacyl-[acyl-carrier protein] reductase (EC 1.1.1.100)	CBSS-246196.1.peg.364; <br>Fatty Acid Biosynthesis FASII
Iron acquisition and metabolism	fig|273384.25.peg.2781	CXR27_14665	5	CXR27	3205433	CDS	CP025334	3205433	3206215	2	+	783	ABC transporter (iron.B12.siderophore.hemin) , ATP-binding component	ABC transporter [iron.B12.siderophore.hemin]
Iron acquisition and metabolism	fig|273384.17.peg.1150	BAUR920_01175	8	BAUR920	89610	CDS	FXZG01000005	90608	89610	-2	-	999	Ferric enterobactin-binding periplasmic protein FepB (TC 3.A.1.14.2)	Siderophore Enterobactin
Iron acquisition and metabolism	fig|273384.15.peg.1758	BAURA86_01786	6	BAURA86	151045	CDS	FXZI01000005	151680	151045	-3	-	636	Flavin reductase (EC 1.5.1.30)	Heme, hemin uptake and utilization systems in GramNegatives
Membrane Transport	fig|273384.15.peg.4038	BAURA86_04095	6	BAURA86	3	CDS	FXZI01000070	356	3	-2	-	354	ATPase component BioM of energizing module of biotin ECF transporter	Biotin biosynthesis; <br>Biotin synthesis cluster; <br>ECF class transporters
Membrane Transport	fig|273384.25.peg.2785	CXR27_14690	5	CXR27	3209944	CDS	CP025334	3209944	3211995	1	+	2052	Copper resistance protein D	Copper homeostasis; <br>Copper uptake system CopCD
Membrane Transport	fig|1703.41.peg.2681	BLSMQ_RS13945	0	BLSMQ	3044796	CDS	NZ_CP017150	3044796	3046268	3	+	1473	Di-/tripeptide transporter	Proton-dependent Peptide Transporters
Membrane Transport	fig|273384.17.peg.3610	BAUR920_03665	8	BAUR920	3	CDS	FXZG01000073	500	3	-2	-	498	Dipeptide transport ATP-binding protein DppD (TC 3.A.1.5.2)	ABC transporter dipeptide (TC 3.A.1.5.2)
Membrane Transport	fig|273384.19.peg.2752	BAUR9175_02788	1	BAUR9175	97077	CDS	FXZB01000019	98099	97077	-2	-	1023	Dipeptide transport system permease protein DppB (TC 3.A.1.5.2)	ABC transporter dipeptide (TC 3.A.1.5.2)
Membrane Transport	fig|273384.26.peg.2942	CXR23_15630	10	CXR23	3384996	CDS	CP025330	3384996	3385940	3	+	945	Dipeptide transport system permease protein DppB (TC 3.A.1.5.2)	ABC transporter dipeptide (TC 3.A.1.5.2)
Membrane Transport	fig|273384.16.peg.2534	BAURA63_02572	2	BAURA63	11963	CDS	FXYZ01000011	12907	11963	-1	-	945	Dipeptide transport system permease protein DppC (TC 3.A.1.5.2)	ABC transporter dipeptide (TC 3.A.1.5.2)
Membrane Transport	fig|273384.26.peg.2943	CXR23_15635	10	CXR23	3385965	CDS	CP025330	3385965	3386840	3	+	876	Dipeptide transport system permease protein DppC (TC 3.A.1.5.2)	ABC transporter dipeptide (TC 3.A.1.5.2)
Membrane Transport	fig|273384.17.peg.2447	BAUR920_02488	8	BAUR920	11391	CDS	FXZG01000015	11828	11391	-2	-	438	DUF1850 domain-containing protein	A TRAP transporter and a hypothetical
Membrane Transport	fig|1703.46.peg.1692	CIK79_RS08850	9	CIK79	214004	CDS	NZ_NRGX01000001	1973219	1974958	2	+	1740	Duplicated ATPase component YkoD of energizing module of thiamin-regulated ECF transporter for HydroxyMethylPyrimidine	ECF class transporters
Membrane Transport	fig|273384.22.peg.3195	CXR24_16740	3	CXR24	3653370	CDS	CP025331	3654446	3653370	-2	-	1077	HoxN/HupN/NixA family nickel/cobalt transporter	Transport of Nickel and Cobalt
Membrane Transport	fig|273384.16.peg.3814	BAURA63_03871	2	BAURA63	3	CDS	FXYZ01000091	794	3	-2	-	792	Iron-chelator utilization protein	Ton and Tol transport systems
Membrane Transport	fig|273384.16.peg.3617	BAURA63_03669	2	BAURA63	3526	CDS	FXYZ01000035	4416	3526	-3	-	891	Iron-chelator utilization protein	Ton and Tol transport systems
Membrane Transport	fig|273384.26.peg.3344	CXR23_17710	10	CXR23	3838341	CDS	CP025330	3840671	3838341	-2	-	2331	Lead, cadmium, zinc and mercury transporting ATPase (EC 3.6.3.3) (EC 3.6.3.5); Copper-translocating P-type ATPase (EC 3.6.3.4)	Copper Transport System; <br>Copper homeostasis
Membrane Transport	fig|273384.25.peg.2786	CXR27_14695	5	CXR27	3211992	CDS	CP025334	3211992	3214238	3	+	2247	Lead, cadmium, zinc and mercury transporting ATPase (EC 3.6.3.3) (EC 3.6.3.5); Copper-translocating P-type ATPase (EC 3.6.3.4)	Copper Transport System; <br>Copper homeostasis
Membrane Transport	fig|273384.16.peg.2130	BAURA63_02161	2	BAURA63	30339	CDS	FXYZ01000008	30339	31247	3	+	909	Mg/Co/Ni transporter MgtE / CBS domain	Magnesium transport
Membrane Transport	fig|273384.15.peg.659	BAURA86_00671	6	BAURA86	95378	CDS	FXZI01000002	95378	96655	2	+	1278	Na+/H+ antiporter NhaA type	NhaA, NhaD and Sodium-dependent phosphate transporters
Membrane Transport	fig|273384.19.peg.2745	BAUR9175_02781	1	BAUR9175	87638	CDS	FXZB01000019	89239	87638	-1	-	1602	Oligopeptide ABC transporter, periplasmic oligopeptide-binding protein OppA (TC 3.A.1.5.1)	ABC transporter oligopeptide (TC 3.A.1.5.1)
Membrane Transport	fig|273384.16.peg.2535	BAURA63_02573	2	BAURA63	12915	CDS	FXYZ01000011	14660	12915	-2	-	1746	Oligopeptide ABC transporter, periplasmic oligopeptide-binding protein OppA (TC 3.A.1.5.1)	ABC transporter oligopeptide (TC 3.A.1.5.1)
Membrane Transport	fig|273384.16.peg.359	BAURA63_00365	2	BAURA63	400149	CDS	FXYZ01000001	400346	400149	-2	-	198	Oligopeptide ABC transporter, periplasmic oligopeptide-binding protein OppA (TC 3.A.1.5.1)	ABC transporter oligopeptide (TC 3.A.1.5.1)
Membrane Transport	fig|273384.26.peg.2655	CXR23_14115	10	CXR23	3040834	CDS	CP025330	3040834	3042546	1	+	1713	Oligopeptide ABC transporter, periplasmic oligopeptide-binding protein OppA (TC 3.A.1.5.1)	ABC transporter oligopeptide (TC 3.A.1.5.1)
Membrane Transport	fig|273384.16.peg.2532	BAURA63_02570	2	BAURA63	10123	CDS	FXYZ01000011	10971	10123	-3	-	849	Oligopeptide transport ATP-binding protein OppD (TC 3.A.1.5.1)	ABC transporter oligopeptide (TC 3.A.1.5.1)
Membrane Transport	fig|273384.19.peg.2750	BAUR9175_02786	1	BAUR9175	94406	CDS	FXZB01000019	95185	94406	-1	-	780	Oligopeptide transport ATP-binding protein OppF (TC 3.A.1.5.1)	ABC transporter oligopeptide (TC 3.A.1.5.1)
Membrane Transport	fig|273384.16.peg.2531	BAURA63_02569	2	BAURA63	9311	CDS	FXYZ01000011	10120	9311	-1	-	810	Oligopeptide transport ATP-binding protein OppF (TC 3.A.1.5.1)	ABC transporter oligopeptide (TC 3.A.1.5.1)
Membrane Transport	fig|273384.26.peg.2654	CXR23_14110	10	CXR23	3038872	CDS	CP025330	3038872	3040617	1	+	1746	Oligopeptide transport ATP-binding protein OppF (TC 3.A.1.5.1)	ABC transporter oligopeptide (TC 3.A.1.5.1)
Membrane Transport	fig|273384.19.peg.2751	BAUR9175_02787	1	BAUR9175	95182	CDS	FXZB01000019	97080	95182	-3	-	1899	Oligopeptide transport system permease protein OppB (TC 3.A.1.5.1)	ABC transporter oligopeptide (TC 3.A.1.5.1)
Membrane Transport	fig|273384.26.peg.2652	CXR23_14100	10	CXR23	3036906	CDS	CP025330	3036906	3037886	3	+	981	Oligopeptide transport system permease protein OppB (TC 3.A.1.5.1)	ABC transporter oligopeptide (TC 3.A.1.5.1)
Membrane Transport	fig|273384.26.peg.2944	CXR23_15640	10	CXR23	3386849	CDS	CP025330	3386849	3387856	2	+	1008	Oligopeptide transport system permease protein OppB (TC 3.A.1.5.1)	ABC transporter oligopeptide (TC 3.A.1.5.1)
Membrane Transport	fig|273384.26.peg.2653	CXR23_14105	10	CXR23	3037892	CDS	CP025330	3037892	3038860	2	+	969	Oligopeptide transport system permease protein OppC (TC 3.A.1.5.1)	ABC transporter oligopeptide (TC 3.A.1.5.1)
Membrane Transport	fig|273384.26.peg.2646	CXR23_14070	10	CXR23	3031180	CDS	CP025330	3031803	3031180	-3	-	624	Protein-L-isoaspartate O-methyltransferase (EC 2.1.1.77)	Lanthionine Synthetases; <br>Protein-L-isoaspartate O-methyltransferase; <br>Stationary phase repair cluster; <br>Ton and Tol transport systems
Membrane Transport	fig|273384.26.peg.3341	CXR23_17695	10	CXR23	3835382	CDS	CP025330	3835696	3835382	-1	-	315	Repressor CsoR of the copZA operon	Copper Transport System
Membrane Transport	fig|273384.15.peg.4039	BAURA86_04096	6	BAURA86	353	CDS	FXZI01000070	892	353	-1	-	540	Substrate-specific component BioY of biotin ECF transporter	Biotin biosynthesis; <br>Biotin synthesis cluster; <br>ECF class transporters
Membrane Transport	fig|1703.46.peg.1691	CIK79_RS08845	9	CIK79	213645	CDS	NZ_NRGX01000001	1972860	1973288	3	+	429	Substrate-specific component YkoE of thiamin-regulated ECF transporter for HydroxyMethylPyrimidine	ECF class transporters; <br>Thiamin biosynthesis
Membrane Transport	fig|273384.22.peg.3193	CXR24_16730	3	CXR24	3649504	CDS	CP025331	3649504	3651654	1	+	2151	TolA protein	Ton and Tol transport systems
Membrane Transport	fig|273384.16.peg.3614	BAURA63_03666	2	BAURA63	799	CDS	FXYZ01000035	1485	799	-3	-	687	Transmembrane component YkoC of energizing module of thiamin-regulated ECF transporter for HydroxyMethylPyrimidine	ECF class transporters; <br>Thiamin biosynthesis
Membrane Transport	fig|1703.46.peg.1693	CIK79_RS08855	9	CIK79	215740	CDS	NZ_NRGX01000001	1974955	1975722	1	+	768	Transmembrane component YkoC of energizing module of thiamin-regulated ECF transporter for HydroxyMethylPyrimidine	ECF class transporters; <br>Thiamin biosynthesis
Membrane Transport	fig|273384.17.peg.2448	BAUR920_02489	8	BAUR920	11877	CDS	FXZG01000015	12863	11877	-2	-	987	TRAP transporter solute receptor, unknown substrate 1	A TRAP transporter and a hypothetical
Membrane Transport	fig|273384.17.peg.2446	BAUR920_02487	8	BAUR920	9330	CDS	FXZG01000015	11384	9330	-2	-	2055	TRAP transporter, 4TM/12TM fusion protein, unknown substrate 1	A TRAP transporter and a hypothetical
Membrane Transport	fig|1703.41.peg.1360	BLSMQ_RS07055	0	BLSMQ	1531454	CDS	NZ_CP017150	1531454	1533421	2	+	1968	Tricarboxylate transport membrane protein TctA	CBSS-49338.1.peg.459; <br>Tricarboxylate transport cassette; <br>Tricarboxylate transport system
Membrane Transport	fig|273384.20.peg.564	CXR25_02970	7	CXR25	639199	CDS	CP025333	639199	639936	1	+	738	Tricarboxylate transport membrane protein TctA	CBSS-49338.1.peg.459; <br>Tricarboxylate transport cassette; <br>Tricarboxylate transport system
Membrane Transport	fig|273384.19.peg.385	BAUR9175_00392	1	BAUR9175	77679	CDS	FXZB01000002	78311	77679	-2	-	633	Tricarboxylate transport protein TctB	Tricarboxylate transport cassette; <br>Tricarboxylate transport system
Membrane Transport	fig|273384.19.peg.386	BAUR9175_00393	1	BAUR9175	78311	CDS	FXZB01000002	79294	78311	-1	-	984	Tricarboxylate transport protein TctC	Tricarboxylate transport cassette; <br>Tricarboxylate transport system
Membrane Transport	fig|1703.41.peg.1356	BLSMQ_RS07035	0	BLSMQ	1527763	CDS	NZ_CP017150	1527763	1528539	1	+	777	Tricarboxylate transport protein TctC	Tricarboxylate transport cassette; <br>Tricarboxylate transport system
Membrane Transport	fig|1703.41.peg.1359	BLSMQ_RS07050	0	BLSMQ	1531106	CDS	NZ_CP017150	1531106	1531438	2	+	333	Tricarboxylate transport protein TctC	Tricarboxylate transport cassette; <br>Tricarboxylate transport system
Membrane Transport	fig|273384.16.peg.3108	BAURA63_03157	2	BAURA63	32673	CDS	FXYZ01000017	34055	32673	-2	-	1383	Type II/IV secretion system ATP hydrolase TadA/VirB11/CpaF, TadA subfamily	Widespread colonization island
Metabolism of Aromatic Compounds	fig|273384.25.peg.373	CXR27_01940	5	CXR27	419737	CDS	CP025334	419737	420591	1	+	855	1,2-dihydroxycyclohexa-3,5-diene-1-carboxylate dehydrogenase (EC 1.3.1.25)	Benzoate degradation
Metabolism of Aromatic Compounds	fig|273384.25.peg.347	CXR27_01810	5	CXR27	385898	CDS	CP025334	387484	385898	-1	-	1587	4-hydroxyphenylacetate 3-monooxygenase (EC 1.14.13.3)	4-Hydroxyphenylacetic acid catabolic pathway; <br>Aromatic Amin Catabolism
Metabolism of Aromatic Compounds	fig|273384.25.peg.370	CXR27_01925	5	CXR27	416186	CDS	CP025334	416186	417568	2	+	1383	Benzoate 1,2-dioxygenase alpha subunit (EC 1.14.12.10)	Benzoate degradation; <br>Dioxygenases (EC 1.14.12.-)
Metabolism of Aromatic Compounds	fig|273384.25.peg.368	CXR27_01915	5	CXR27	413691	CDS	CP025334	415100	413691	-2	-	1410	B MFS transporter BenK	Benzoate degradation
Metabolism of Aromatic Compounds	fig|273384.25.peg.367	CXR27_01910	5	CXR27	412370	CDS	CP025334	413662	412370	-1	-	1293	Benzoate transport protein	Benzoate degradation
Metabolism of Aromatic Compounds	fig|273384.25.peg.348	CXR27_01815	5	CXR27	387623	CDS	CP025334	388204	387623	-1	-	582	Nitrilotriacetate monooxygenase component B (EC 1.14.13.-)	Aromatic Amin Catabolism
Metabolism of Aromatic Compounds	fig|273384.15.peg.1753	BAURA86_01781	6	BAURA86	146681	CDS	FXZI01000005	148696	146681	-1	-	2016	Salicylate hydroxylase (EC 1.14.13.1)	Salicylate and gentisate catabolism; <br>Salicylate ester degradation
Miscellaneous	fig|273384.17.peg.395	BAUR920_00405	8	BAUR920	113644	CDS	FXZG01000002	114114	113644	-3	-	471	DUF1794	Iron-sulfur cluster assembly
Miscellaneous	fig|273384.19.peg.3670	BAUR9175_03720	1	BAUR9175	118	CDS	FXZB01000045	483	118	-3	-	366	High-affinity choline uptake protein BetT	Choline and Betaine Uptake and Betaine Biosynthesis; <br>Choline uptake and conversion to betaine clusters; <br>Niacin-Choline transport and metabolism
Miscellaneous	fig|273384.26.peg.3793	CXR23_20055	10	CXR23	4376069	CDS	CP025330	4377091	4376069	-1	-	1023	Putative oxidoreductase YncB	Broadly distributed proteins not in subsystems; <br>Quinone oxidoreductase family
ND	fig|1703.46.peg.17	CIK79_RS00085	9	CIK79	2582999	CDS	NZ_NRGX01000001	31600	33234	1	+	1635	2,3-dihydroxybenzoate-AMP ligase (EC 2.7.7.58)	- none -
ND	fig|1703.41.peg.1355	BLSMQ_RS07030	0	BLSMQ	1526672	CDS	NZ_CP017150	1526672	1527775	2	+	1104	2-methylaconitate cis-trans isomerase	- none -
ND	fig|1703.46.peg.2071	CIK79_RS10790	9	CIK79	652204	CDS	NZ_NRGX01000001	2411419	2412159	1	+	741	3-hydroxyacyl-CoA dehydrogenase	- none -
ND	fig|1703.46.peg.18	CIK79_RS00090	9	CIK79	2584679	CDS	NZ_NRGX01000001	33280	33954	1	+	675	4&#39;-phosphopantetheinyl transferase entD (EC 2.7.8.-)	- none -
ND	fig|273384.19.peg.3147	BAUR9175_03192	1	BAUR9175	4121	CDS	FXZB01000026	5095	4121	-1	-	975	4,5-dihydroxyphthalate decarboxylase (EC 4.1.1.55)	- none -
ND	fig|273384.15.peg.3810	BAURA86_03860	6	BAURA86	22748	CDS	FXZI01000024	22748	22936	2	+	189	4-oxalocrotonate decarboxylase (EC 4.1.1.77)	- none -
ND	fig|273384.15.peg.586	BAURA86_00598	6	BAURA86	20561	CDS	FXZI01000002	20561	21376	2	+	816	Methylthioadenosine phosphorylase (EC 2.4.2.28)	- none -
ND	fig|273384.22.peg.3559	CXR24_18650	3	CXR24	4095096	CDS	CP025331	4096055	4095096	-2	-	960	ABC amino acid transporter, permease component	- none -
ND	fig|273384.15.peg.632	BAURA86_00644	6	BAURA86	69417	CDS	FXZI01000002	70247	69417	-2	-	831	ABC daunorubicin resistance transporter, transmembrane permease component	- none -
ND	fig|273384.17.peg.1416	BAUR920_01443	8	BAUR920	181188	CDS	FXZG01000006	181188	182207	3	+	1020	ABC Fe(3+) transporter, substrate binding component	- none -
ND	fig|273384.15.peg.3868	BAURA86_03921	6	BAURA86	13368	CDS	FXZI01000026	13368	14372	3	+	1005	ABC Fe(3+) transporter, substrate binding component	- none -
ND	fig|273384.17.peg.3056	BAUR920_03102	8	BAUR920	1017	CDS	FXZG01000023	1017	1766	3	+	750	ABC transporter	- none -
ND	fig|273384.16.peg.3620	BAURA63_03672	2	BAURA63	7123	CDS	FXYZ01000035	9462	7123	-3	-	2340	ABC transporter ATP-binding protein	- none -
ND	fig|273384.15.peg.635	BAURA86_00647	6	BAURA86	71952	CDS	FXZI01000002	71952	72821	3	+	870	ABC transporter ATP-binding protein	- none -
ND	fig|273384.26.peg.2949	CXR23_15670	10	CXR23	3392856	CDS	CP025330	3392856	3394403	3	+	1548	ABC transporter peptide-binding protein	- none -
ND	fig|273384.16.peg.2533	BAURA63_02571	2	BAURA63	10968	CDS	FXYZ01000011	11963	10968	-2	-	996	ABC transporter permease protein	- none -
ND	fig|273384.17.peg.1418	BAUR920_01445	8	BAUR920	183284	CDS	FXZG01000006	184099	183284	-1	-	816	ABC transporter, ATP-binding protein	- none -
ND	fig|273384.21.peg.2557	CXR26_13435	4	CXR26	2897394	CDS	CP025332	2897394	2899037	3	+	1644	ABC transporter, ATP-binding protein-related protein	- none -
ND	fig|273384.17.peg.1419	BAUR920_01446	8	BAUR920	184106	CDS	FXZG01000006	186475	184106	-1	-	2370	ABC transporter, permease protein	- none -
ND	fig|273384.15.peg.640	BAURA86_00652	6	BAURA86	76956	CDS	FXZI01000002	76956	79478	3	+	2523	ABC transporter, permease protein	- none -
ND	fig|273384.15.peg.1833	BAURA86_01864	6	BAURA86	234529	CDS	FXZI01000005	234529	235326	1	+	798	ABC transporter, permease protein	- none -
ND	fig|1703.46.peg.783	CIK79_RS04095	9	CIK79	3487556	CDS	NZ_NRGX01000001	936157	937560	1	+	1404	ABC transporter, permease protein	- none -
ND	fig|273384.26.peg.2776	CXR23_14755	10	CXR23	3184635	CDS	CP025330	3184635	3186020	3	+	1386	ABC transporter, permease protein	- none -
ND	fig|273384.15.peg.3873	BAURA86_03926	6	BAURA86	19163	CDS	FXZI01000026	19163	20932	2	+	1770	ABC transporter, transmembrane region:ABC transporter	- none -
ND	fig|273384.15.peg.633	BAURA86_00645	6	BAURA86	70225	CDS	FXZI01000002	71259	70225	-3	-	1035	ABC-transporter ATP-binding component	- none -
ND	fig|273384.19.peg.3144	BAUR9175_03189	1	BAUR9175	1330	CDS	FXZB01000026	2298	1330	-3	-	969	ABC-type amino acid transport system, permease component	- none -
ND	fig|273384.17.peg.1147	BAUR920_01172	8	BAUR920	86475	CDS	FXZG01000005	87389	86475	-2	-	915	ABC-type Fe3+-siderophore transport system, ATPase component	- none -
ND	fig|273384.17.peg.1149	BAUR920_01174	8	BAUR920	88543	CDS	FXZG01000005	89613	88543	-3	-	1071	ABC-type Fe3+-siderophore transport system, permease component	- none -
ND	fig|273384.15.peg.3869	BAURA86_03922	6	BAURA86	14369	CDS	FXZI01000026	14369	15442	2	+	1074	ABC-type Fe3+-siderophore transport system, permease component	- none -
ND	fig|273384.25.peg.2286	CXR27_12035	5	CXR27	2600592	CDS	CP025334	2601083	2600592	-2	-	492	Acetyltransferase	- none -
ND	fig|273384.21.peg.2953	CXR26_15485	4	CXR26	3349781	CDS	CP025332	3349781	3350248	2	+	468	Acetyltransferase (EC 2.3.1.-)	- none -
ND	fig|273384.15.peg.468	BAURA86_00479	6	BAURA86	523444	CDS	FXZI01000001	524082	523444	-3	-	639	Acetyltransferase, GNAT family	- none -
ND	fig|1703.41.peg.1984	BLSMQ_RS10340	0	BLSMQ	2221921	CDS	NZ_CP017150	2222454	2221921	-3	-	534	Acetyltransferase, GNAT family	- none -
ND	fig|273384.25.peg.1617	CXR27_08520	5	CXR27	1844563	CDS	CP025334	1845000	1844563	-3	-	438	Acetyltransferase, GNAT family	- none -
ND	fig|273384.17.peg.2773	BAUR920_02815	8	BAUR920	60163	CDS	FXZG01000018	60163	62862	1	+	2700	ACT domain containing transcriptional regulators, related to gcvR of E.coli	- none -
ND	fig|273384.21.peg.2533	CXR26_13305	4	CXR26	2865384	CDS	CP025332	2866274	2865384	-2	-	891	Adenine-specific DNA methyltransferase	- none -
ND	fig|1703.46.peg.1652	CIK79_RS08630	9	CIK79	171637	CDS	NZ_NRGX01000001	1931934	1930852	-3	-	1083	Adenine-specific methyltransferase (EC 2.1.1.72)	CBSS-257314.1.peg.752
ND	fig|1703.46.peg.55	CIK79_RS00275	9	CIK79	2619411	CDS	NZ_NRGX01000001	69043	68012	-1	-	1032	Adenine-specific methyltransferase (EC 2.1.1.72)	CBSS-257314.1.peg.752
ND	fig|273384.19.peg.3146	BAUR9175_03191	1	BAUR9175	3282	CDS	FXZB01000026	4124	3282	-2	-	843	Aliphatic amidase AmiE (EC 3.5.1.4)	- none -
ND	fig|273384.15.peg.2616	BAURA86_02656	6	BAURA86	2437	CDS	FXZI01000010	2437	3321	1	+	885	Aliphatic amidase AmiE (EC 3.5.1.4)	- none -
ND	fig|273384.15.peg.3589	BAURA86_03638	6	BAURA86	2178	CDS	FXZI01000019	2519	2178	-2	-	342	Alkylhydroperoxidase AhpD core	- none -
ND	fig|273384.25.peg.1868	CXR27_09850	5	CXR27	2128384	CDS	CP025334	2128686	2128384	-3	-	303	Alkylmercury lyase (EC 4.99.1.2)	- none -
ND	fig|1703.46.peg.1690	CIK79_RS08840	9	CIK79	212351	CDS	NZ_NRGX01000001	1971566	1972444	2	+	879	Alpha/beta hydrolase fold	- none -
ND	fig|273384.15.peg.3621	BAURA86_03670	6	BAURA86	50286	CDS	FXZI01000019	50286	54158	3	+	3873	Alpha-1,4-N-acetylgalactosamine transferase PglJ (EC 2.4.1.-)	- none -
ND	fig|1703.46.peg.1911	CIK79_RS09965	9	CIK79	461750	CDS	NZ_NRGX01000001	2220965	2222155	2	+	1191	Alpha-methylacyl-CoA racemase (EC 5.1.99.4)	- none -
ND	fig|273384.26.peg.2947	CXR23_15660	10	CXR23	3389807	CDS	CP025330	3389807	3391294	2	+	1488	Amidase( EC:3.5.1.4 )	- none -
ND	fig|273384.16.peg.2528	BAURA63_02566	2	BAURA63	4327	CDS	FXYZ01000011	4327	5832	1	+	1506	Amidohydrolase family enzyme	- none -
ND	fig|273384.21.peg.3164	CXR26_16595	4	CXR26	3585179	CDS	CP025332	3585179	3585898	2	+	720	Amino acid transporter related protein	- none -
ND	fig|273384.26.peg.1446	CXR23_07700	10	CXR23	1645296	CDS	CP025330	1646714	1645296	-2	-	1419	Anaerobic C4-dicarboxylate transporter	- none -
ND	fig|273384.15.peg.3602	BAURA86_03651	6	BAURA86	18007	CDS	FXZI01000019	21381	18007	-3	-	3375	Anaerobic dimethyl sulfoxide reductase chain A (EC 1.8.5.3)	- none -
ND	fig|273384.19.peg.1010	BAUR9175_01027	1	BAUR9175	170382	CDS	FXZB01000005	170382	170840	3	+	459	Antibiotic efflux protein	- none -
ND	fig|1703.46.peg.1224	CIK79_RS06395	9	CIK79	3995813	CDS	NZ_NRGX01000001	1447065	1444414	-3	-	2652	ATPase / Transcriptional regulator, LuxR family	- none -
ND	fig|1703.46.peg.1225	CIK79_RS06400	9	CIK79	3998377	CDS	NZ_NRGX01000001	1449581	1446978	-2	-	2604	ATPase / Transcriptional regulator, LuxR family	- none -
ND	fig|273384.22.peg.3322	CXR24_17410	3	CXR24	3813369	CDS	CP025331	3816026	3813369	-2	-	2658	ATPase / Transcriptional regulator, LuxR family	- none -
ND	fig|273384.22.peg.3323	CXR24_17415	3	CXR24	3816023	CDS	CP025331	3818635	3816023	-1	-	2613	ATPase / Transcriptional regulator, LuxR family	- none -
ND	fig|273384.19.peg.2909	BAUR9175_02948	1	BAUR9175	77363	CDS	FXZB01000021	77363	78949	2	+	1587	ATPase associated with various cellular activities, AAA_5	- none -
ND	fig|1703.41.peg.1991	BLSMQ_RS10380	0	BLSMQ	2229595	CDS	NZ_CP017150	2229595	2230413	1	+	819	ATP-binding protein p271	- none -
ND	fig|273384.15.peg.4034	BAURA86_04091	6	BAURA86	552	CDS	FXZI01000068	552	1106	3	+	555	ATP-dependent DNA helicase RecG (EC 3.6.1.-)	- none -
ND	fig|1703.46.peg.2004	CIK79_RS10440	9	CIK79	571024	CDS	NZ_NRGX01000001	2331609	2330239	-3	-	1371	ATP-dependent DNA helicase RecG-related protein	- none -
ND	fig|273384.20.peg.218	CXR25_01150	7	CXR25	237270	CDS	CP025333	237270	239441	3	+	2172	ATP-dependent DNA helicase rep (EC 3.6.1.-)	- none -
ND	fig|1703.46.peg.1212	CIK79_RS06335	9	CIK79	3978527	CDS	NZ_NRGX01000001	1428048	1427128	-3	-	921	ATP-grasp enzyme-like protein	- none -
ND	fig|273384.26.peg.1677	CXR23_08925	10	CXR23	1902626	CDS	CP025330	1902626	1902862	2	+	237	Autotransporter	- none -
ND	fig|1703.46.peg.60	CIK79_RS00300	9	CIK79	2625329	CDS	NZ_NRGX01000001	74892	73930	-3	-	963	Avirulence gene D	- none -
ND	fig|273384.25.peg.372	CXR27_01935	5	CXR27	418185	CDS	CP025334	418185	419747	3	+	1563	Benzoate dioxygenase, ferredoxin reductase component	- none -
ND	fig|273384.26.peg.1429	CXR23_07610	10	CXR23	1625767	CDS	CP025330	1626867	1625767	-3	-	1101	Benzyl alcohol dehydrogenase	- none -
ND	fig|1703.46.peg.2016	CIK79_RS10500	9	CIK79	588954	CDS	NZ_NRGX01000001	2348169	2350250	3	+	2082	Beta-1,3-glucosyltransferase	- none -
ND	fig|273384.21.peg.3250	CXR26_17050	4	CXR26	3688325	CDS	CP025332	3688867	3688325	-1	-	543	Beta-1,3-glucosyltransferase	- none -
ND	fig|273384.15.peg.3872	BAURA86_03925	6	BAURA86	17415	CDS	FXZI01000026	17415	19166	3	+	1752	Bifunctional ABC transporter	- none -
ND	fig|273384.20.peg.2239	CXR25_11730	7	CXR25	2526869	CDS	CP025333	2528890	2526869	-1	-	2022	Bipolar DNA helicase HerA	Rad50-Mre11 DNA repair cluster
ND	fig|273384.20.peg.212	CXR25_01120	7	CXR25	230897	CDS	CP025333	232111	230897	-1	-	1215	Bll3089 protein	- none -
ND	fig|273384.16.peg.516	BAURA63_00523	2	BAURA63	11110	CDS	FXYZ01000002	11110	12063	1	+	954	Bll4710 protein	- none -
ND	fig|273384.20.peg.2679	CXR25_14025	7	CXR25	3006291	CDS	CP025333	3007808	3006291	-2	-	1518	C-5 cytosine-specific DNA methylase family protein	- none -
ND	fig|273384.17.peg.2854	BAUR920_02897	8	BAUR920	1687	CDS	FXZG01000020	2583	1687	-3	-	897	CAAX amino terminal protease family protein	- none -
ND	fig|273384.15.peg.2828	BAURA86_02868	6	BAURA86	61763	CDS	FXZI01000011	62704	61763	-1	-	942	Carboxylesterase	- none -
ND	fig|273384.16.peg.2530	BAURA63_02568	2	BAURA63	7700	CDS	FXYZ01000011	9223	7700	-1	-	1524	Carboxypeptidase-related protein	- none -
ND	fig|273384.17.peg.3014	BAUR920_03058	8	BAUR920	20176	CDS	FXZG01000022	20176	20649	1	+	474	Catechol 2,3-dioxygenase	- none -
ND	fig|273384.17.peg.1617	BAUR920_01645	8	BAUR920	32714	CDS	FXZG01000008	32714	34279	2	+	1566	Cationic amino acid transporter	- none -
ND	fig|273384.26.peg.2775	CXR23_14750	10	CXR23	3183899	CDS	CP025330	3183899	3184633	2	+	735	Cell division transporter, ATP-binding protein FtsE (TC 3.A.5.1.1)	Bacterial Cell Division
ND	fig|273384.19.peg.3529	BAUR9175_03579	1	BAUR9175	3	CDS	FXZB01000038	818	3	-2	-	816	Cell surface glycoprotein 1 precursor	- none -
ND	fig|1703.46.peg.1220	CIK79_RS06375	9	CIK79	3988056	CDS	NZ_NRGX01000001	1437973	1436657	-1	-	1317	Coenzyme F390 synthetase-like protein	- none -
ND	fig|273384.26.peg.3783	CXR23_20005	10	CXR23	4365911	CDS	CP025330	4366150	4365911	-1	-	240	COG0477: Permeases of the major facilitator superfamily	- none -
ND	fig|273384.15.peg.4052	BAURA86_04109	6	BAURA86	637	CDS	FXZI01000076	1107	637	-3	-	471	COG0531: Amino acid transporters	- none -
ND	fig|273384.26.peg.2795	CXR23_14860	10	CXR23	3212281	CDS	CP025330	3212281	3213126	1	+	846	COG0657: Esterase/lipase	- none -
ND	fig|1703.46.peg.1210	CIK79_RS06325	9	CIK79	3974512	CDS	NZ_NRGX01000001	1425452	1423113	-2	-	2340	COG1219: ATP-dependent protease Clp, ATPase subunit	- none -
ND	fig|273384.22.peg.3306	CXR24_17330	3	CXR24	3790632	CDS	CP025331	3792896	3790632	-2	-	2265	COG1219: ATP-dependent protease Clp, ATPase subunit	- none -
ND	fig|273384.26.peg.992	CXR23_05260	10	CXR23	1155342	CDS	CP025330	1155342	1155887	3	+	546	COG1409: Predicted phosphohydrolases	- none -
ND	fig|273384.26.peg.1333	CXR23_07120	10	CXR23	1512286	CDS	CP025330	1514556	1512286	-3	-	2271	COG2197: Response regulator containing a CheY-like receiver domain and an HTH DNA-binding domain	- none -
ND	fig|273384.15.peg.643	BAURA86_00655	6	BAURA86	81382	CDS	FXZI01000002	82089	81382	-3	-	708	COG2719: Uncharacterized conserved protein	- none -
ND	fig|1703.41.peg.914	BLSMQ_RS04765	0	BLSMQ	1049997	CDS	NZ_CP017150	1050254	1049997	-2	-	258	COG3464: Transposase and inactivated derivatives	- none -
ND	fig|273384.15.peg.3947	BAURA86_04000	6	BAURA86	357	CDS	FXZI01000032	357	3233	3	+	2877	COG5295: Autotransporter adhesin	- none -
ND	fig|273384.17.peg.3197	BAUR920_03244	8	BAUR920	2736	CDS	FXZG01000026	4640	2736	-2	-	1905	Conserved domain protein	- none -
ND	fig|273384.15.peg.881	BAURA86_00896	6	BAURA86	329303	CDS	FXZI01000002	330226	329303	-1	-	924	Conserved hypothetical protein 2SC10A7.05c	- none -
ND	fig|273384.17.peg.3527	BAUR920_03577	8	BAUR920	3489	CDS	FXZG01000041	5198	3489	-2	-	1710	Conserved hypothetical protein SC6F7.06c	- none -
ND	fig|273384.19.peg.2933	BAUR9175_02973	1	BAUR9175	26355	CDS	FXZB01000022	26355	26711	3	+	357	Conserved protein	- none -
ND	fig|273384.15.peg.642	BAURA86_00654	6	BAURA86	80290	CDS	FXZI01000002	81267	80290	-3	-	978	Conserved protein YyaK	- none -
ND	fig|273384.17.peg.1629	BAUR920_01657	8	BAUR920	52615	CDS	FXZG01000008	54450	52615	-3	-	1836	Cyanophycin synthase (EC 6.3.2.29)(EC 6.3.2.30)	- none -
ND	fig|273384.17.peg.3326	BAUR920_03373	8	BAUR920	9224	CDS	FXZG01000030	9224	10096	2	+	873	Cyclase family protein	- none -
ND	fig|273384.26.peg.300	CXR23_01605	10	CXR23	335566	CDS	CP025330	335566	336117	1	+	552	Cytidine/deoxycytidylate deaminase family protein	- none -
ND	fig|273384.21.peg.247	CXR26_01315	4	CXR26	278772	CDS	CP025332	278772	279077	3	+	306	Cytidine/deoxycytidylate deaminase family protein	- none -
ND	fig|273384.21.peg.248	CXR26_01320	4	CXR26	279084	CDS	CP025332	279084	279317	3	+	234	Cytidine/deoxycytidylate deaminase family protein	- none -
ND	fig|273384.22.peg.2857	CXR24_14970	3	CXR24	3269963	CDS	CP025331	3269963	3271213	2	+	1251	Cytochrome P450	- none -
ND	fig|273384.15.peg.1068	BAURA86_01086	6	BAURA86	547977	CDS	FXZI01000002	547977	548582	3	+	606	Demethylmenaquinone methyltransferase	- none -
ND	fig|1703.46.peg.1635	CIK79_RS08545	9	CIK79	158731	CDS	NZ_NRGX01000001	1918710	1917946	-3	-	765	DNA alkylation repair enzyme	- none -
ND	fig|273384.22.peg.2263	CXR24_11890	3	CXR24	2578086	CDS	CP025331	2578086	2578850	3	+	765	DNA helicase related protein	- none -
ND	fig|273384.19.peg.2928	BAUR9175_02968	1	BAUR9175	21909	CDS	FXZB01000022	21909	23417	3	+	1509	DNA invertase	- none -
ND	fig|273384.20.peg.2620	CXR25_13720	7	CXR25	2958222	CDS	CP025333	2958222	2959853	3	+	1632	DNA primase (EC 2.7.7.-), phage-associated	- none -
ND	fig|273384.15.peg.1613	BAURA86_01640	6	BAURA86	238143	CDS	FXZI01000004	238143	241073	3	+	2931	DNA primase domain protein	- none -
ND	fig|273384.17.peg.1832	BAUR920_01860	8	BAUR920	140687	CDS	FXZG01000009	141160	140687	-1	-	474	DNA-binding response regulator, LuxR family	- none -
ND	fig|273384.15.peg.638	BAURA86_00650	6	BAURA86	75215	CDS	FXZI01000002	75215	76003	2	+	789	DNA-binding response regulator, LuxR family	- none -
ND	fig|273384.15.peg.1746	BAURA86_01774	6	BAURA86	140277	CDS	FXZI01000005	140978	140277	-2	-	702	DNA-binding response regulator, LuxR family	- none -
ND	fig|273384.15.peg.3847	BAURA86_03900	6	BAURA86	19626	CDS	FXZI01000025	19626	22751	3	+	3126	DNA-directed DNA polymerase	- none -
ND	fig|273384.15.peg.3882	BAURA86_03935	6	BAURA86	6448	CDS	FXZI01000027	7062	6448	-3	-	615	DNA-invertase	- none -
ND	fig|273384.20.peg.2694	CXR25_14100	7	CXR25	3015388	CDS	CP025333	3015388	3016803	1	+	1416	DNA-invertase	- none -
ND	fig|273384.17.peg.3015	BAUR920_03059	8	BAUR920	21027	CDS	FXZG01000022	22313	21027	-2	-	1287	Drug resistance transporter, EmrB/QacA subfamily	- none -
ND	fig|273384.17.peg.1358	BAUR920_01385	8	BAUR920	119391	CDS	FXZG01000006	120233	119391	-2	-	843	dTDP-4-dehydrorhamnose reductase (EC 1.1.1.133)	- none -
ND	fig|273384.15.peg.556	BAURA86_00568	6	BAURA86	619474	CDS	FXZI01000001	619474	620463	1	+	990	DUF1526 domain-containing protein	- none -
ND	fig|273384.17.peg.1655	BAUR920_01683	8	BAUR920	89099	CDS	FXZG01000008	89099	90604	2	+	1506	EA59 gene protein	- none -
ND	fig|273384.19.peg.346	BAUR9175_00353	1	BAUR9175	35016	CDS	FXZB01000002	35016	36038	3	+	1023	EhpF	- none -
ND	fig|273384.17.peg.3205	BAUR920_03252	8	BAUR920	17006	CDS	FXZG01000026	17006	20134	2	+	3129	Endonuclease	- none -
ND	fig|1703.41.peg.284	BLSMQ_RS01475	0	BLSMQ	322112	CDS	NZ_CP017150	322112	325228	2	+	3117	Endonuclease	- none -
ND	fig|273384.22.peg.2285	CXR24_12015	3	CXR24	2612660	CDS	CP025331	2612660	2613160	2	+	501	Enzyme; Degradation of DNA	- none -
ND	fig|273384.21.peg.2961	CXR26_15530	4	CXR26	3358310	CDS	CP025332	3359485	3358310	-1	-	1176	Epoxide hydrolase (EC 3.3.2.9)	- none -
ND	fig|273384.17.peg.3337	BAUR920_03384	8	BAUR920	19350	CDS	FXZG01000030	20270	19350	-2	-	921	Esterase/lipase	- none -
ND	fig|1703.41.peg.2960	BLSMQ_RS15390	0	BLSMQ	3354529	CDS	NZ_CP017150	3354529	3354930	1	+	402	Excisionase domain protein	- none -
ND	fig|273384.19.peg.2906	BAUR9175_02945	1	BAUR9175	74716	CDS	FXZB01000021	75153	74716	-3	-	438	Exoenzymes regulatory protein AepA precursor	- none -
ND	fig|273384.19.peg.389	BAUR9175_00396	1	BAUR9175	81812	CDS	FXZB01000002	83431	81812	-1	-	1620	Exoenzymes regulatory protein AepA precursor	- none -
ND	fig|1703.41.peg.2361	BLSMQ_RS12290	0	BLSMQ	2665652	CDS	NZ_CP017150	2665879	2665652	-1	-	228	Exonuclease V subunit beta	- none -
ND	fig|273384.22.peg.3310	CXR24_17350	3	CXR24	3797285	CDS	CP025331	3797285	3798322	2	+	1038	Exopolysaccharide biosynthesis glycosyltransferase EpsF (EC 2.4.1.-)	- none -
ND	fig|273384.16.peg.3507	BAURA63_03556	2	BAURA63	188	CDS	FXYZ01000028	188	400	2	+	213	Exopolysaccharide biosynthesis protein EpsI, predicted pyruvyl transferase	- none -
ND	fig|273384.16.peg.3686	BAURA63_03740	2	BAURA63	1134	CDS	FXYZ01000043	1727	1134	-2	-	594	Exopolysaccharide biosynthesis protein EpsI, predicted pyruvyl transferase	- none -
ND	fig|273384.17.peg.394	BAUR920_00404	8	BAUR920	112646	CDS	FXZG01000002	113443	112646	-1	-	798	Extracellular solute-binding protein, family 3	- none -
ND	fig|273384.21.peg.293	CXR26_01550	4	CXR26	330311	CDS	CP025332	330311	331540	2	+	1230	Fatty-acid-CoA ligase FadD7	- none -
ND	fig|273384.16.peg.3615	BAURA63_03667	2	BAURA63	1482	CDS	FXYZ01000035	2942	1482	-2	-	1461	Ferric iron ABC transporter, ATP-binding protein	- none -
ND	fig|273384.15.peg.459	BAURA86_00470	6	BAURA86	512301	CDS	FXZI01000001	512301	513326	3	+	1026	FIG00351855: hypothetical protein	- none -
ND	fig|273384.26.peg.2833	CXR23_15055	10	CXR23	3251640	CDS	CP025330	3251640	3252218	3	+	579	FIG00447681: hypothetical protein	- none -
ND	fig|273384.26.peg.3320	CXR23_17585	10	CXR23	3814438	CDS	CP025330	3814953	3814438	-3	-	516	FIG00447681: hypothetical protein	- none -
ND	fig|273384.19.peg.1751	BAUR9175_01774	1	BAUR9175	27536	CDS	FXZB01000011	27922	27536	-1	-	387	FIG00447935: hypothetical protein	- none -
ND	fig|1703.46.peg.2604	CIK79_RS13595	9	CIK79	1253421	CDS	NZ_NRGX01000001	3012636	3014030	3	+	1395	FIG00448179: hypothetical protein	- none -
ND	fig|1703.46.peg.2622	CIK79_RS13695	9	CIK79	1273546	CDS	NZ_NRGX01000001	3034155	3032761	-3	-	1395	FIG00448179: hypothetical protein	- none -
ND	fig|1703.46.peg.2891	CIK79_RS15105	9	CIK79	1573924	CDS	NZ_NRGX01000001	3334533	3333139	-3	-	1395	FIG00448179: hypothetical protein	- none -
ND	fig|273384.15.peg.4010	BAURA86_04067	6	BAURA86	1143	CDS	FXZI01000056	1143	1379	3	+	237	FIG00448465: hypothetical protein	- none -
ND	fig|273384.15.peg.4055	BAURA86_04112	6	BAURA86	3	CDS	FXZI01000078	245	3	-2	-	243	FIG00448603: hypothetical protein	- none -
ND	fig|273384.26.peg.532	CXR23_02815	10	CXR23	625275	CDS	CP025330	626033	625275	-2	-	759	FIG00462249: hypothetical protein	- none -
ND	fig|273384.26.peg.2768	CXR23_14715	10	CXR23	3168098	CDS	CP025330	3168098	3171598	2	+	3501	FIG00464231: hypothetical protein	- none -
ND	fig|273384.25.peg.1875	CXR27_09885	5	CXR27	2135221	CDS	CP025334	2135221	2135532	1	+	312	FIG00548336: hypothetical protein	- none -
ND	fig|1703.41.peg.2352	BLSMQ_RS12250	0	BLSMQ	2655067	CDS	NZ_CP017150	2657058	2655067	-3	-	1992	FIG006126: DNA helicase, restriction/modification system component YeeB	CBSS-316273.3.peg.2378
ND	fig|273384.16.peg.3234	BAURA63_03283	2	BAURA63	10800	CDS	FXYZ01000020	10800	13388	3	+	2589	FIG00725033: hypothetical protein	- none -
ND	fig|273384.17.peg.3210	BAUR920_03257	8	BAUR920	24762	CDS	FXZG01000026	24762	26345	3	+	1584	FIG00793576: hypothetical protein	- none -
ND	fig|273384.16.peg.2078	BAURA63_02108	2	BAURA63	185701	CDS	FXYZ01000007	185701	186510	1	+	810	FIG00804569: hypothetical protein	- none -
ND	fig|273384.21.peg.398	CXR26_02080	4	CXR26	452142	CDS	CP025332	452142	453461	3	+	1320	FIG00814202: hypothetical protein	- none -
ND	fig|273384.15.peg.582	BAURA86_00594	6	BAURA86	17476	CDS	FXZI01000002	17476	18153	1	+	678	FIG00821404: hypothetical protein	- none -
ND	fig|273384.16.peg.3792	BAURA63_03849	2	BAURA63	229	CDS	FXYZ01000078	229	1137	1	+	909	FIG00830864: hypothetical protein	- none -
ND	fig|273384.15.peg.4004	BAURA86_04061	6	BAURA86	51	CDS	FXZI01000053	1304	51	-2	-	1254	FIG00830864: hypothetical protein	- none -
ND	fig|273384.15.peg.3993	BAURA86_04050	6	BAURA86	374	CDS	FXZI01000045	374	1594	2	+	1221	FIG00830864: hypothetical protein	- none -
ND	fig|273384.17.peg.1658	BAUR920_01686	8	BAUR920	92439	CDS	FXZG01000008	92439	93650	3	+	1212	FIG00866611: hypothetical protein	- none -
ND	fig|273384.22.peg.2278	CXR24_11975	3	CXR24	2597368	CDS	CP025331	2597368	2600304	1	+	2937	FIG00897069: hypothetical protein	- none -
ND	fig|273384.26.peg.3366	CXR23_17825	10	CXR23	3860345	CDS	CP025330	3861040	3860345	-1	-	696	FIG00986051: hypothetical protein	- none -
ND	fig|273384.19.peg.3145	BAUR9175_03190	1	BAUR9175	2353	CDS	FXZB01000026	3270	2353	-3	-	918	FIG00987435: hypothetical protein	- none -
ND	fig|1703.46.peg.3449	CIK79_RS18000	9	CIK79	2190202	CDS	NZ_NRGX01000001	3950736	3949417	-3	-	1320	FIG01001418: hypothetical protein	- none -
ND	fig|273384.15.peg.1386	BAURA86_01407	6	BAURA86	7090	CDS	FXZI01000004	7090	7794	1	+	705	FIG01038085: hypothetical protein	- none -
ND	fig|273384.25.peg.529	CXR27_02765	5	CXR27	621282	CDS	CP025334	621282	623063	3	+	1782	FIG01049960: hypothetical protein	- none -
ND	fig|273384.15.peg.546	BAURA86_00558	6	BAURA86	611578	CDS	FXZI01000001	611578	612402	1	+	825	FIG01056462: hypothetical protein	- none -
ND	fig|1703.46.peg.162	CIK79_RS00860	9	CIK79	2762531	CDS	NZ_NRGX01000001	214587	211132	-3	-	3456	FIG01059430: hypothetical protein	- none -
ND	fig|273384.21.peg.2962	CXR26_15535	4	CXR26	3359566	CDS	CP025332	3359566	3360117	1	+	552	FIG01136303: hypothetical protein	- none -
ND	fig|273384.15.peg.3605	BAURA86_03654	6	BAURA86	24542	CDS	FXZI01000019	24542	25870	2	+	1329	FIG01160564: hypothetical protein	- none -
ND	fig|1703.41.peg.2669	BLSMQ_RS13885	0	BLSMQ	3028209	CDS	NZ_CP017150	3028964	3028209	-2	-	756	FIG01193130: hypothetical protein	- none -
ND	fig|273384.15.peg.1740	BAURA86_01768	6	BAURA86	130797	CDS	FXZI01000005	132077	130797	-2	-	1281	FIG014574: hypothetical protein	CBSS-159087.4.peg.2189
ND	fig|273384.15.peg.900	BAURA86_00915	6	BAURA86	350164	CDS	FXZI01000002	350164	351462	1	+	1299	FIG014574: hypothetical protein	CBSS-159087.4.peg.2189
ND	fig|273384.20.peg.2240	CXR25_11735	7	CXR25	2528883	CDS	CP025333	2530148	2528883	-2	-	1266	FIG036446: hypothetical protein	Rad50-Mre11 DNA repair cluster
ND	fig|273384.17.peg.2850	BAUR920_02893	8	BAUR920	69912	CDS	FXZG01000019	69912	72710	3	+	2799	FIG045374: Type II restriction enzyme, methylase subunit YeeA	- none -
ND	fig|273384.16.peg.3076	BAURA63_03125	2	BAURA63	80	CDS	FXYZ01000017	1225	80	-1	-	1146	FIG045374: Type II restriction enzyme, methylase subunit YeeA	- none -
ND	fig|273384.16.peg.3481	BAURA63_03530	2	BAURA63	27140	CDS	FXYZ01000026	28762	27140	-1	-	1623	FIG045374: Type II restriction enzyme, methylase subunit YeeA	- none -
ND	fig|1703.41.peg.1977	BLSMQ_RS10300	0	BLSMQ	2214956	CDS	NZ_CP017150	2216599	2214956	-1	-	1644	FIG045374: Type II restriction enzyme, methylase subunit YeeA	CBSS-316273.3.peg.2378
ND	fig|1703.41.peg.1978	BLSMQ_RS10310	0	BLSMQ	2217600	CDS	NZ_CP017150	2218748	2217600	-2	-	1149	FIG045374: Type II restriction enzyme, methylase subunit YeeA	CBSS-316273.3.peg.2378
ND	fig|1703.41.peg.2353	BLSMQ_RS12255	0	BLSMQ	2657055	CDS	NZ_CP017150	2659772	2657055	-2	-	2718	FIG045374: Type II restriction enzyme, methylase subunit YeeA	CBSS-316273.3.peg.2378
ND	fig|273384.21.peg.2186	CXR26_11495	4	CXR26	2470958	CDS	CP025332	2473750	2470958	-1	-	2793	FIG045374: Type II restriction enzyme, methylase subunit YeeA	- none -
ND	fig|273384.26.peg.423	CXR23_02250	10	CXR23	486659	CDS	CP025330	487909	486659	-1	-	1251	Formamidase (EC 3.5.1.49)	- none -
ND	fig|273384.20.peg.2876	CXR25_15020	7	CXR25	3235126	CDS	CP025333	3235959	3235126	-3	-	834	Formate efflux transporter (TC 2.A.44 family)	- none -
ND	fig|273384.19.peg.2915	BAUR9175_02954	1	BAUR9175	3077	CDS	FXZB01000022	3077	4567	2	+	1491	FtsK/SpoIIIE family protein	- none -
ND	fig|273384.17.peg.1618	BAUR920_01646	8	BAUR920	34460	CDS	FXZG01000008	34460	36250	2	+	1791	Gamma-glutamyltranspeptidase (EC 2.3.2.2)	- none -
ND	fig|273384.16.peg.721	BAURA63_00732	2	BAURA63	243041	CDS	FXYZ01000002	243610	243041	-1	-	570	GCN5-related N-acetyltransferase	- none -
ND	fig|273384.21.peg.1640	CXR26_08635	4	CXR26	1840050	CDS	CP025332	1840050	1840406	3	+	357	GCN5-related N-acetyltransferase	- none -
ND	fig|273384.26.peg.1345	CXR23_07180	10	CXR23	1530039	CDS	CP025330	1530039	1531574	3	+	1536	Gll1781 protein	- none -
ND	fig|273384.17.peg.3375	BAUR920_03423	8	BAUR920	2818	CDS	FXZG01000032	4485	2818	-3	-	1668	Gll3707 protein	- none -
ND	fig|273384.17.peg.2769	BAUR920_02811	8	BAUR920	56599	CDS	FXZG01000018	56599	56769	1	+	171	Glycolate oxidase, subunit GlcD (glcD)	- none -
ND	fig|273384.17.peg.2453	BAUR920_02494	8	BAUR920	14496	CDS	FXZG01000015	14496	15572	3	+	1077	Glycopeptide antibiotics resistance protein	- none -
ND	fig|273384.19.peg.3701	BAUR9175_03751	1	BAUR9175	7468	CDS	FXZB01000047	7468	10308	1	+	2841	Glycosyl transferase	- none -
ND	fig|1703.46.peg.3255	CIK79_RS16980	9	CIK79	1972297	CDS	NZ_NRGX01000001	3731512	3732426	1	+	915	Glycosyl transferase	- none -
ND	fig|1703.46.peg.3254	CIK79_RS16975	9	CIK79	1971730	CDS	NZ_NRGX01000001	3730945	3731475	1	+	531	Glycosyl transferase, family 2	- none -
ND	fig|273384.26.peg.518	CXR23_02740	10	CXR23	606470	CDS	CP025330	606470	608158	2	+	1689	Glycosyl transferase, family 2	- none -
ND	fig|273384.21.peg.1643	CXR26_08650	4	CXR26	1842704	CDS	CP025332	1842704	1843555	2	+	852	Glycosyl transferase, family 2	- none -
ND	fig|1703.41.peg.471	BLSMQ_RS02450	0	BLSMQ	554086	CDS	NZ_CP017150	554086	555171	1	+	1086	Glycosyl transferase, group 1	- none -
ND	fig|273384.22.peg.2836	CXR24_14865	3	CXR24	3245993	CDS	CP025331	3247168	3245993	-1	-	1176	Glycosyl transferase, group 1	- none -
ND	fig|273384.25.peg.522	CXR27_02700	5	CXR27	601955	CDS	CP025334	601955	604291	2	+	2337	Glycosyl transferase, group 1	- none -
ND	fig|273384.16.peg.3519	BAURA63_03568	2	BAURA63	21872	CDS	FXYZ01000028	26488	21872	-1	-	4617	Glycosyl transferase, group 1 family protein	- none -
ND	fig|273384.17.peg.1622	BAUR920_01650	8	BAUR920	40561	CDS	FXZG01000008	40561	41412	1	+	852	Glycosyltransferase	- none -
ND	fig|273384.15.peg.3610	BAURA86_03659	6	BAURA86	31942	CDS	FXZI01000019	31942	34134	1	+	2193	Glycosyltransferase	- none -
ND	fig|273384.22.peg.498	CXR24_02615	3	CXR24	589518	CDS	CP025331	591089	589518	-2	-	1572	Glycosyltransferase	- none -
ND	fig|273384.16.peg.3508	BAURA63_03557	2	BAURA63	671	CDS	FXYZ01000028	671	4363	2	+	3693	Glycosyltransferase (EC 2.4.1.-)	- none -
ND	fig|1703.41.peg.2975	BLSMQ_RS15470	0	BLSMQ	3372790	CDS	NZ_CP017150	3374628	3372790	-3	-	1839	Glycosyltransferase (EC 2.4.1.-)	- none -
ND	fig|1703.46.peg.1215	CIK79_RS06350	9	CIK79	3982711	CDS	NZ_NRGX01000001	1432511	1431312	-2	-	1200	Glycosyltransferase (EC 2.4.1.-)	- none -
ND	fig|273384.22.peg.2837	CXR24_14870	3	CXR24	3247165	CDS	CP025331	3250014	3247165	-3	-	2850	Glycosyltransferase (EC 2.4.1.-)	- none -
ND	fig|273384.16.peg.2839	BAURA63_02881	2	BAURA63	108408	CDS	FXYZ01000013	108770	108408	-2	-	363	Glyoxalase family protein	- none -
ND	fig|273384.15.peg.1828	BAURA86_01859	6	BAURA86	231995	CDS	FXZI01000005	231995	232348	2	+	354	Glyoxalase family protein	- none -
ND	fig|273384.21.peg.2534	CXR26_13310	4	CXR26	2866403	CDS	CP025332	2866403	2868115	2	+	1713	GTPase subunit of restriction endonuclease	- none -
ND	fig|273384.17.peg.1722	BAUR920_01750	8	BAUR920	5656	CDS	FXZG01000009	6573	5656	-3	-	918	GumL protein	- none -
ND	fig|1703.46.peg.732	CIK79_RS03830	9	CIK79	3421443	CDS	NZ_NRGX01000001	870802	870044	-1	-	759	GumL protein	- none -
ND	fig|273384.26.peg.3059	CXR23_16235	10	CXR23	3530685	CDS	CP025330	3530685	3531965	3	+	1281	GumL protein	- none -
ND	fig|1703.41.peg.1983	BLSMQ_RS10335	0	BLSMQ	2221304	CDS	NZ_CP017150	2221924	2221304	-1	-	621	HAD-superfamily hydrolase, subfamily IA, variant 1	- none -
ND	fig|273384.22.peg.808	CXR24_04235	3	CXR24	950357	CDS	CP025331	950357	950983	2	+	627	HAD-superfamily hydrolase, subfamily IA, variant 1	- none -
ND	fig|1703.41.peg.277	BLSMQ_RS19265	0	BLSMQ	311127	CDS	NZ_CP017150	311127	311459	3	+	333	Heat shock protein G homolog	- none -
ND	fig|273384.25.peg.2363	CXR27_12460	5	CXR27	2709633	CDS	CP025334	2713100	2709633	-2	-	3468	Helicase, SNF2 family	- none -
ND	fig|273384.15.peg.887	BAURA86_00902	6	BAURA86	335759	CDS	FXZI01000002	335759	337639	2	+	1881	Helicase, SNF2/RAD54 family	- none -
ND	fig|273384.26.peg.420	CXR23_02235	10	CXR23	483670	CDS	CP025330	483670	485562	1	+	1893	Helicase, SNF2/RAD54 family	- none -
ND	fig|273384.15.peg.3860	BAURA86_03913	6	BAURA86	1257	CDS	FXZI01000026	1257	1862	3	+	606	Helix-turn-helix domain-containing protein	- none -
ND	fig|273384.22.peg.3314	CXR24_17370	3	CXR24	3802185	CDS	CP025331	3802185	3803399	3	+	1215	Heteropolysaccharide repeat unit export protein	- none -
ND	fig|273384.25.peg.2766	CXR27_14585	5	CXR27	3189887	CDS	CP025334	3189887	3190333	2	+	447	Histidine triad (HIT) nucleotide-binding protein, similarity with At5g48545 and yeast YDL125C (HNT1)	- none -
ND	fig|1703.46.peg.23	CIK79_RS00115	9	CIK79	2588876	CDS	NZ_NRGX01000001	37477	37824	1	+	348	Histone protein Lsr2	- none -
ND	fig|273384.17.peg.288	BAUR920_00294	8	BAUR920	324159	CDS	FXZG01000001	324515	324159	-2	-	357	HNH endonuclease family protein	- none -
ND	fig|1703.41.peg.3328	BLSMQ_RS19670	0	BLSMQ	3759492	CDS	NZ_CP017150	3759731	3759492	-2	-	240	Hsp20/alpha crystallin family protein	- none -
ND	fig|1703.41.peg.2816	BLSMQ_RS14665	0	BLSMQ	3185281	CDS	NZ_CP017150	3186351	3185281	-3	-	1071	Hydrolase, alpha/beta fold family	- none -
ND	fig|273384.16.peg.3445	BAURA63_03494	2	BAURA63	6281	CDS	FXYZ01000026	7219	6281	-1	-	939	Hypothetical plasmid protein	- none -
ND	fig|273384.19.peg.3740	BAUR9175_03793	1	BAUR9175	1	CDS	FXZB01000054	1	276	1	+	276	Hypothetical protein	- none -
ND	fig|273384.19.peg.3650	BAUR9175_03700	1	BAUR9175	1	CDS	FXZB01000044	1	591	1	+	591	Hypothetical protein	- none -
ND	fig|273384.19.peg.3717	BAUR9175_03767	1	BAUR9175	3	CDS	FXZB01000050	452	3	-2	-	450	Hypothetical protein	- none -
ND	fig|273384.19.peg.3750	BAUR9175_03804	1	BAUR9175	3	CDS	FXZB01000057	3	1268	3	+	1266	Hypothetical protein	- none -
ND	fig|273384.19.peg.3401	BAUR9175_03446	1	BAUR9175	245	CDS	FXZB01000033	415	245	-1	-	171	Hypothetical protein	- none -
ND	fig|273384.19.peg.3751	BAUR9175_03805	1	BAUR9175	1341	CDS	FXZB01000057	1341	1922	3	+	582	Hypothetical protein	- none -
ND	fig|273384.19.peg.3737	BAUR9175_03790	1	BAUR9175	3544	CDS	FXZB01000053	3678	3544	-3	-	135	Hypothetical protein	- none -
ND	fig|273384.19.peg.3653	BAUR9175_03703	1	BAUR9175	3600	CDS	FXZB01000044	5315	3600	-2	-	1716	Hypothetical protein	- none -
ND	fig|273384.19.peg.3738	BAUR9175_03791	1	BAUR9175	3671	CDS	FXZB01000053	3937	3671	-1	-	267	Hypothetical protein	- none -
ND	fig|273384.19.peg.3229	BAUR9175_03274	1	BAUR9175	3769	CDS	FXZB01000028	3960	3769	-3	-	192	Hypothetical protein	- none -
ND	fig|273384.19.peg.3554	BAUR9175_03604	1	BAUR9175	4810	CDS	FXZB01000039	5448	4810	-3	-	639	Hypothetical protein	- none -
ND	fig|273384.19.peg.3149	BAUR9175_03194	1	BAUR9175	7093	CDS	FXZB01000026	7551	7093	-3	-	459	Hypothetical protein	- none -
ND	fig|273384.19.peg.3487	BAUR9175_03535	1	BAUR9175	7395	CDS	FXZB01000036	7395	7556	3	+	162	Hypothetical protein	- none -
ND	fig|273384.19.peg.320	BAUR9175_00327	1	BAUR9175	7874	CDS	FXZB01000002	8422	7874	-1	-	549	Hypothetical protein	- none -
ND	fig|273384.19.peg.321	BAUR9175_00328	1	BAUR9175	8440	CDS	FXZB01000002	8440	8595	1	+	156	Hypothetical protein	- none -
ND	fig|273384.19.peg.3559	BAUR9175_03609	1	BAUR9175	10148	CDS	FXZB01000039	10148	10435	2	+	288	Hypothetical protein	- none -
ND	fig|273384.19.peg.3101	BAUR9175_03146	1	BAUR9175	11634	CDS	FXZB01000025	11870	11634	-2	-	237	Hypothetical protein	- none -
ND	fig|273384.19.peg.3561	BAUR9175_03611	1	BAUR9175	12218	CDS	FXZB01000039	12218	12949	2	+	732	Hypothetical protein	- none -
ND	fig|273384.19.peg.3684	BAUR9175_03734	1	BAUR9175	13261	CDS	FXZB01000045	13671	13261	-3	-	411	Hypothetical protein	- none -
ND	fig|273384.19.peg.3563	BAUR9175_03613	1	BAUR9175	13792	CDS	FXZB01000039	14022	13792	-3	-	231	Hypothetical protein	- none -
ND	fig|273384.19.peg.3664	BAUR9175_03714	1	BAUR9175	16653	CDS	FXZB01000044	16653	16814	3	+	162	Hypothetical protein	- none -
ND	fig|273384.19.peg.3568	BAUR9175_03618	1	BAUR9175	19116	CDS	FXZB01000039	19529	19116	-2	-	414	Hypothetical protein	- none -
ND	fig|273384.19.peg.3388	BAUR9175_03433	1	BAUR9175	20832	CDS	FXZB01000032	20832	21134	3	+	303	Hypothetical protein	- none -
ND	fig|273384.19.peg.3243	BAUR9175_03288	1	BAUR9175	21525	CDS	FXZB01000028	21644	21525	-2	-	120	Hypothetical protein	- none -
ND	fig|273384.19.peg.3390	BAUR9175_03435	1	BAUR9175	23205	CDS	FXZB01000032	23205	23969	3	+	765	Hypothetical protein	- none -
ND	fig|273384.19.peg.2929	BAUR9175_02969	1	BAUR9175	23459	CDS	FXZB01000022	23459	23692	2	+	234	Hypothetical protein	- none -
ND	fig|273384.19.peg.2931	BAUR9175_02971	1	BAUR9175	24544	CDS	FXZB01000022	25557	24544	-3	-	1014	Hypothetical protein	- none -
ND	fig|273384.19.peg.2932	BAUR9175_02972	1	BAUR9175	25814	CDS	FXZB01000022	25814	26302	2	+	489	Hypothetical protein	- none -
ND	fig|273384.19.peg.337	BAUR9175_00344	1	BAUR9175	26319	CDS	FXZB01000002	26319	26897	3	+	579	Hypothetical protein	- none -
ND	fig|273384.19.peg.2934	BAUR9175_02974	1	BAUR9175	26712	CDS	FXZB01000022	26712	27362	3	+	651	Hypothetical protein	- none -
ND	fig|273384.19.peg.3215	BAUR9175_03260	1	BAUR9175	27071	CDS	FXZB01000027	27071	28261	2	+	1191	Hypothetical protein	- none -
ND	fig|273384.19.peg.2936	BAUR9175_02976	1	BAUR9175	28280	CDS	FXZB01000022	28280	28519	2	+	240	Hypothetical protein	- none -
ND	fig|273384.19.peg.2937	BAUR9175_02977	1	BAUR9175	28403	CDS	FXZB01000022	28972	28403	-1	-	570	Hypothetical protein	- none -
ND	fig|273384.19.peg.2938	BAUR9175_02978	1	BAUR9175	28939	CDS	FXZB01000022	30051	28939	-3	-	1113	Hypothetical protein	- none -
ND	fig|273384.19.peg.2690	BAUR9175_02726	1	BAUR9175	32438	CDS	FXZB01000019	32438	32959	2	+	522	Hypothetical protein	- none -
ND	fig|273384.19.peg.2942	BAUR9175_02982	1	BAUR9175	36259	CDS	FXZB01000022	36259	36570	1	+	312	Hypothetical protein	- none -
ND	fig|273384.19.peg.2943	BAUR9175_02983	1	BAUR9175	36834	CDS	FXZB01000022	36834	37502	3	+	669	Hypothetical protein	- none -
ND	fig|273384.19.peg.2944	BAUR9175_02984	1	BAUR9175	37603	CDS	FXZB01000022	37603	37911	1	+	309	Hypothetical protein	- none -
ND	fig|273384.19.peg.2946	BAUR9175_02986	1	BAUR9175	38839	CDS	FXZB01000022	38839	39021	1	+	183	Hypothetical protein	- none -
ND	fig|273384.19.peg.2947	BAUR9175_02987	1	BAUR9175	39024	CDS	FXZB01000022	39024	39263	3	+	240	Hypothetical protein	- none -
ND	fig|273384.19.peg.2949	BAUR9175_02989	1	BAUR9175	39606	CDS	FXZB01000022	39606	40559	3	+	954	Hypothetical protein	- none -
ND	fig|273384.19.peg.2951	BAUR9175_02991	1	BAUR9175	42411	CDS	FXZB01000022	43100	42411	-2	-	690	Hypothetical protein	- none -
ND	fig|273384.19.peg.2161	BAUR9175_02191	1	BAUR9175	45235	CDS	FXZB01000014	45235	45885	1	+	651	Hypothetical protein	- none -
ND	fig|273384.19.peg.2162	BAUR9175_02192	1	BAUR9175	45882	CDS	FXZB01000014	45882	46859	3	+	978	Hypothetical protein	- none -
ND	fig|273384.19.peg.2954	BAUR9175_02994	1	BAUR9175	46421	CDS	FXZB01000022	46741	46421	-1	-	321	Hypothetical protein	- none -
ND	fig|273384.19.peg.762	BAUR9175_00776	1	BAUR9175	49447	CDS	FXZB01000004	49447	49716	1	+	270	Hypothetical protein	- none -
ND	fig|273384.19.peg.3136	BAUR9175_03181	1	BAUR9175	52393	CDS	FXZB01000025	52671	52393	-3	-	279	Hypothetical protein	- none -
ND	fig|273384.19.peg.3034	BAUR9175_03079	1	BAUR9175	58119	CDS	FXZB01000023	58301	58119	-2	-	183	Hypothetical protein	- none -
ND	fig|273384.19.peg.3035	BAUR9175_03080	1	BAUR9175	58380	CDS	FXZB01000023	58541	58380	-2	-	162	Hypothetical protein	- none -
ND	fig|273384.19.peg.3036	BAUR9175_03081	1	BAUR9175	58534	CDS	FXZB01000023	58740	58534	-3	-	207	Hypothetical protein	- none -
ND	fig|273384.19.peg.3038	BAUR9175_03083	1	BAUR9175	60255	CDS	FXZB01000023	60569	60255	-2	-	315	Hypothetical protein	- none -
ND	fig|273384.19.peg.584	BAUR9175_00595	1	BAUR9175	66952	CDS	FXZB01000003	67191	66952	-3	-	240	Hypothetical protein	- none -
ND	fig|273384.19.peg.2904	BAUR9175_02943	1	BAUR9175	72085	CDS	FXZB01000021	72085	73227	1	+	1143	Hypothetical protein	- none -
ND	fig|273384.19.peg.2747	BAUR9175_02783	1	BAUR9175	90394	CDS	FXZB01000019	90394	91242	1	+	849	Hypothetical protein	- none -
ND	fig|273384.19.peg.2418	BAUR9175_02449	1	BAUR9175	91338	CDS	FXZB01000016	91338	91691	3	+	354	Hypothetical protein	- none -
ND	fig|273384.19.peg.2419	BAUR9175_02450	1	BAUR9175	91693	CDS	FXZB01000016	91693	92055	1	+	363	Hypothetical protein	- none -
ND	fig|273384.19.peg.2420	BAUR9175_02451	1	BAUR9175	92055	CDS	FXZB01000016	92055	92204	3	+	150	Hypothetical protein	- none -
ND	fig|273384.19.peg.2422	BAUR9175_02453	1	BAUR9175	93697	CDS	FXZB01000016	93697	93855	1	+	159	Hypothetical protein	- none -
ND	fig|273384.19.peg.2211	BAUR9175_02242	1	BAUR9175	108630	CDS	FXZB01000014	109289	108630	-2	-	660	Hypothetical protein	- none -
ND	fig|273384.19.peg.2212	BAUR9175_02243	1	BAUR9175	109489	CDS	FXZB01000014	109644	109489	-3	-	156	Hypothetical protein	- none -
ND	fig|273384.19.peg.2334	BAUR9175_02365	1	BAUR9175	120848	CDS	FXZB01000015	120848	123160	2	+	2313	Hypothetical protein	- none -
ND	fig|273384.19.peg.1004	BAUR9175_01021	1	BAUR9175	166088	CDS	FXZB01000005	166447	166088	-1	-	360	Hypothetical protein	- none -
ND	fig|273384.19.peg.1009	BAUR9175_01026	1	BAUR9175	169627	CDS	FXZB01000005	169627	169878	1	+	252	Hypothetical protein	- none -
ND	fig|273384.19.peg.709	BAUR9175_00722	1	BAUR9175	201266	CDS	FXZB01000003	201266	201949	2	+	684	Hypothetical protein	- none -
ND	fig|273384.19.peg.221	BAUR9175_00227	1	BAUR9175	252011	CDS	FXZB01000001	252011	252295	2	+	285	Hypothetical protein	- none -
ND	fig|273384.17.peg.3607	BAUR920_03662	8	BAUR920	181	CDS	FXZG01000071	570	181	-3	-	390	Hypothetical protein	- none -
ND	fig|273384.17.peg.3559	BAUR920_03613	8	BAUR920	200	CDS	FXZG01000047	200	439	2	+	240	Hypothetical protein	- none -
ND	fig|273384.17.peg.3524	BAUR920_03574	8	BAUR920	290	CDS	FXZG01000041	1027	290	-1	-	738	Hypothetical protein	- none -
ND	fig|273384.17.peg.3605	BAUR920_03660	8	BAUR920	440	CDS	FXZG01000070	440	850	2	+	411	Hypothetical protein	- none -
ND	fig|273384.17.peg.3227	BAUR920_03274	8	BAUR920	465	CDS	FXZG01000027	465	617	3	+	153	Hypothetical protein	- none -
ND	fig|273384.17.peg.3599	BAUR920_03654	8	BAUR920	677	CDS	FXZG01000065	1108	677	-1	-	432	Hypothetical protein	- none -
ND	fig|273384.17.peg.3608	BAUR920_03663	8	BAUR920	773	CDS	FXZG01000071	1105	773	-1	-	333	Hypothetical protein	- none -
ND	fig|273384.17.peg.3606	BAUR920_03661	8	BAUR920	878	CDS	FXZG01000070	878	1072	2	+	195	Hypothetical protein	- none -
ND	fig|273384.17.peg.3525	BAUR920_03575	8	BAUR920	1024	CDS	FXZG01000041	1581	1024	-3	-	558	Hypothetical protein	- none -
ND	fig|273384.17.peg.2631	BAUR920_02672	8	BAUR920	1170	CDS	FXZG01000017	1298	1170	-2	-	129	Hypothetical protein	- none -
ND	fig|273384.17.peg.2632	BAUR920_02673	8	BAUR920	1421	CDS	FXZG01000017	1549	1421	-1	-	129	Hypothetical protein	- none -
ND	fig|273384.17.peg.3584	BAUR920_03638	8	BAUR920	1644	CDS	FXZG01000055	1808	1644	-2	-	165	Hypothetical protein	- none -
ND	fig|273384.17.peg.3477	BAUR920_03525	8	BAUR920	2451	CDS	FXZG01000037	2451	2852	3	+	402	Hypothetical protein	- none -
ND	fig|273384.17.peg.3058	BAUR920_03104	8	BAUR920	4200	CDS	FXZG01000023	4200	4403	3	+	204	Hypothetical protein	- none -
ND	fig|273384.17.peg.2440	BAUR920_02481	8	BAUR920	5439	CDS	FXZG01000015	5439	5885	3	+	447	Hypothetical protein	- none -
ND	fig|273384.17.peg.3322	BAUR920_03369	8	BAUR920	5684	CDS	FXZG01000030	5887	5684	-1	-	204	Hypothetical protein	- none -
ND	fig|273384.17.peg.3529	BAUR920_03579	8	BAUR920	5915	CDS	FXZG01000041	5915	6565	2	+	651	Hypothetical protein	- none -
ND	fig|273384.17.peg.3530	BAUR920_03580	8	BAUR920	6694	CDS	FXZG01000041	6694	7554	1	+	861	Hypothetical protein	- none -
ND	fig|273384.17.peg.2442	BAUR920_02483	8	BAUR920	6888	CDS	FXZG01000015	7184	6888	-2	-	297	Hypothetical protein	- none -
ND	fig|273384.17.peg.3531	BAUR920_03581	8	BAUR920	7860	CDS	FXZG01000041	7860	8942	3	+	1083	Hypothetical protein	- none -
ND	fig|273384.17.peg.2550	BAUR920_02591	8	BAUR920	8538	CDS	FXZG01000016	8538	9095	3	+	558	Hypothetical protein	- none -
ND	fig|273384.17.peg.2445	BAUR920_02486	8	BAUR920	8790	CDS	FXZG01000015	9164	8790	-2	-	375	Hypothetical protein	- none -
ND	fig|273384.17.peg.3327	BAUR920_03374	8	BAUR920	10198	CDS	FXZG01000030	10533	10198	-3	-	336	Hypothetical protein	- none -
ND	fig|273384.17.peg.3329	BAUR920_03376	8	BAUR920	12134	CDS	FXZG01000030	12583	12134	-1	-	450	Hypothetical protein	- none -
ND	fig|273384.17.peg.2554	BAUR920_02595	8	BAUR920	12496	CDS	FXZG01000016	12669	12496	-3	-	174	Hypothetical protein	- none -
ND	fig|273384.17.peg.2449	BAUR920_02490	8	BAUR920	12978	CDS	FXZG01000015	13130	12978	-2	-	153	Hypothetical protein	- none -
ND	fig|273384.17.peg.2450	BAUR920_02491	8	BAUR920	13127	CDS	FXZG01000015	13285	13127	-1	-	159	Hypothetical protein	- none -
ND	fig|273384.17.peg.3488	BAUR920_03536	8	BAUR920	13569	CDS	FXZG01000037	13569	14276	3	+	708	Hypothetical protein	- none -
ND	fig|273384.17.peg.3489	BAUR920_03537	8	BAUR920	14279	CDS	FXZG01000037	14279	14608	2	+	330	Hypothetical protein	- none -
ND	fig|273384.17.peg.3203	BAUR920_03250	8	BAUR920	14404	CDS	FXZG01000026	14404	15987	1	+	1584	Hypothetical protein	- none -
ND	fig|273384.17.peg.3332	BAUR920_03379	8	BAUR920	15675	CDS	FXZG01000030	15675	15854	3	+	180	Hypothetical protein	- none -
ND	fig|273384.17.peg.3408	BAUR920_03456	8	BAUR920	19188	CDS	FXZG01000033	19188	19331	3	+	144	Hypothetical protein	- none -
ND	fig|273384.17.peg.3209	BAUR920_03256	8	BAUR920	23090	CDS	FXZG01000026	23090	24760	2	+	1671	Hypothetical protein	- none -
ND	fig|273384.17.peg.3020	BAUR920_03064	8	BAUR920	26576	CDS	FXZG01000022	26908	26576	-1	-	333	Hypothetical protein	- none -
ND	fig|273384.17.peg.3211	BAUR920_03258	8	BAUR920	26698	CDS	FXZG01000026	28020	26698	-3	-	1323	Hypothetical protein	- none -
ND	fig|273384.17.peg.3022	BAUR920_03066	8	BAUR920	27153	CDS	FXZG01000022	27365	27153	-2	-	213	Hypothetical protein	- none -
ND	fig|273384.17.peg.3212	BAUR920_03259	8	BAUR920	28017	CDS	FXZG01000026	29192	28017	-2	-	1176	Hypothetical protein	- none -
ND	fig|273384.17.peg.2351	BAUR920_02391	8	BAUR920	28508	CDS	FXZG01000014	28508	28825	2	+	318	Hypothetical protein	- none -
ND	fig|273384.17.peg.1616	BAUR920_01644	8	BAUR920	32125	CDS	FXZG01000008	32298	32125	-3	-	174	Hypothetical protein	- none -
ND	fig|273384.17.peg.2820	BAUR920_02863	8	BAUR920	39051	CDS	FXZG01000019	39236	39051	-2	-	186	Hypothetical protein	- none -
ND	fig|273384.17.peg.1621	BAUR920_01649	8	BAUR920	39340	CDS	FXZG01000008	39340	39846	1	+	507	Hypothetical protein	- none -
ND	fig|273384.17.peg.1623	BAUR920_01651	8	BAUR920	41412	CDS	FXZG01000008	41412	42407	3	+	996	Hypothetical protein	- none -
ND	fig|273384.17.peg.1755	BAUR920_01783	8	BAUR920	44355	CDS	FXZG01000009	44355	45743	3	+	1389	Hypothetical protein	- none -
ND	fig|273384.17.peg.1756	BAUR920_01784	8	BAUR920	45850	CDS	FXZG01000009	45850	48576	1	+	2727	Hypothetical protein	- none -
ND	fig|273384.17.peg.2484	BAUR920_02525	8	BAUR920	46637	CDS	FXZG01000015	46870	46637	-1	-	234	Hypothetical protein	- none -
ND	fig|273384.17.peg.1758	BAUR920_01786	8	BAUR920	50077	CDS	FXZG01000009	50077	51693	1	+	1617	Hypothetical protein	- none -
ND	fig|273384.17.peg.3047	BAUR920_03092	8	BAUR920	51202	CDS	FXZG01000022	51357	51202	-3	-	156	Hypothetical protein	- none -
ND	fig|273384.17.peg.3107	BAUR920_03154	8	BAUR920	56302	CDS	FXZG01000023	56658	56302	-3	-	357	Hypothetical protein	- none -
ND	fig|273384.17.peg.3054	BAUR920_03100	8	BAUR920	57573	CDS	FXZG01000022	57809	57573	-2	-	237	Hypothetical protein	- none -
ND	fig|273384.17.peg.2771	BAUR920_02813	8	BAUR920	57828	CDS	FXZG01000018	57828	58562	3	+	735	Hypothetical protein	- none -
ND	fig|273384.17.peg.2774	BAUR920_02816	8	BAUR920	62865	CDS	FXZG01000018	62865	64046	3	+	1182	Hypothetical protein	- none -
ND	fig|273384.17.peg.2775	BAUR920_02817	8	BAUR920	64056	CDS	FXZG01000018	64056	66137	3	+	2082	Hypothetical protein	- none -
ND	fig|273384.17.peg.2776	BAUR920_02818	8	BAUR920	66137	CDS	FXZG01000018	66137	67771	2	+	1635	Hypothetical protein	- none -
ND	fig|273384.17.peg.2777	BAUR920_02819	8	BAUR920	67768	CDS	FXZG01000018	67768	67992	1	+	225	Hypothetical protein	- none -
ND	fig|273384.17.peg.2778	BAUR920_02820	8	BAUR920	68000	CDS	FXZG01000018	68000	68848	2	+	849	Hypothetical protein	- none -
ND	fig|273384.17.peg.1151	BAUR920_01176	8	BAUR920	90691	CDS	FXZG01000005	91011	90691	-3	-	321	Hypothetical protein	- none -
ND	fig|273384.17.peg.1153	BAUR920_01178	8	BAUR920	92446	CDS	FXZG01000005	93387	92446	-3	-	942	Hypothetical protein	- none -
ND	fig|273384.17.peg.387	BAUR920_00397	8	BAUR920	106619	CDS	FXZG01000002	107392	106619	-1	-	774	Hypothetical protein	- none -
ND	fig|273384.17.peg.389	BAUR920_00399	8	BAUR920	108104	CDS	FXZG01000002	108643	108104	-1	-	540	Hypothetical protein	- none -
ND	fig|273384.17.peg.1363	BAUR920_01390	8	BAUR920	124041	CDS	FXZG01000006	124041	124619	3	+	579	Hypothetical protein	- none -
ND	fig|273384.17.peg.2318	BAUR920_02358	8	BAUR920	129448	CDS	FXZG01000013	129448	130299	1	+	852	Hypothetical protein	- none -
ND	fig|273384.17.peg.1957	BAUR920_01985	8	BAUR920	132153	CDS	FXZG01000010	132449	132153	-2	-	297	Hypothetical protein	- none -
ND	fig|273384.17.peg.1960	BAUR920_01988	8	BAUR920	135036	CDS	FXZG01000010	135242	135036	-2	-	207	Hypothetical protein	- none -
ND	fig|273384.17.peg.1829	BAUR920_01857	8	BAUR920	137950	CDS	FXZG01000009	138717	137950	-3	-	768	Hypothetical protein	- none -
ND	fig|273384.17.peg.1836	BAUR920_01864	8	BAUR920	145506	CDS	FXZG01000009	146183	145506	-2	-	678	Hypothetical protein	- none -
ND	fig|273384.17.peg.1221	BAUR920_01246	8	BAUR920	166019	CDS	FXZG01000005	167251	166019	-1	-	1233	Hypothetical protein	- none -
ND	fig|273384.17.peg.1222	BAUR920_01247	8	BAUR920	167254	CDS	FXZG01000005	168222	167254	-3	-	969	Hypothetical protein	- none -
ND	fig|273384.17.peg.1404	BAUR920_01431	8	BAUR920	167690	CDS	FXZG01000006	167690	168925	2	+	1236	Hypothetical protein	- none -
ND	fig|273384.17.peg.450	BAUR920_00460	8	BAUR920	173503	CDS	FXZG01000002	174393	173503	-3	-	891	Hypothetical protein	- none -
ND	fig|273384.17.peg.1413	BAUR920_01440	8	BAUR920	177504	CDS	FXZG01000006	177504	178349	3	+	846	Hypothetical protein	- none -
ND	fig|273384.17.peg.281	BAUR920_00287	8	BAUR920	315897	CDS	FXZG01000001	316073	315897	-2	-	177	Hypothetical protein	- none -
ND	fig|273384.17.peg.283	BAUR920_00289	8	BAUR920	317095	CDS	FXZG01000001	320406	317095	-3	-	3312	Hypothetical protein	- none -
ND	fig|273384.17.peg.284	BAUR920_00290	8	BAUR920	320406	CDS	FXZG01000001	321083	320406	-2	-	678	Hypothetical protein	- none -
ND	fig|273384.17.peg.285	BAUR920_00291	8	BAUR920	322044	CDS	FXZG01000001	322044	322220	3	+	177	Hypothetical protein	- none -
ND	fig|273384.17.peg.286	BAUR920_00292	8	BAUR920	322541	CDS	FXZG01000001	322541	323692	2	+	1152	Hypothetical protein	- none -
ND	fig|273384.17.peg.287	BAUR920_00293	8	BAUR920	323791	CDS	FXZG01000001	323791	324090	1	+	300	Hypothetical protein	- none -
ND	fig|273384.17.peg.597	BAUR920_00610	8	BAUR920	331807	CDS	FXZG01000002	331807	331941	1	+	135	Hypothetical protein	- none -
ND	fig|273384.17.peg.598	BAUR920_00611	8	BAUR920	331962	CDS	FXZG01000002	331962	332483	3	+	522	Hypothetical protein	- none -
ND	fig|273384.16.peg.3788	BAURA63_03845	2	BAURA63	1	CDS	FXYZ01000076	174	1	-3	-	174	Hypothetical protein	- none -
ND	fig|273384.16.peg.3812	BAURA63_03869	2	BAURA63	1	CDS	FXYZ01000089	1044	1	-3	-	1044	Hypothetical protein	- none -
ND	fig|273384.16.peg.3813	BAURA63_03870	2	BAURA63	2	CDS	FXYZ01000090	2	1036	2	+	1035	Hypothetical protein	- none -
ND	fig|273384.16.peg.3680	BAURA63_03734	2	BAURA63	2	CDS	FXYZ01000042	1966	2	-1	-	1965	Hypothetical protein	- none -
ND	fig|273384.16.peg.3773	BAURA63_03830	2	BAURA63	3	CDS	FXYZ01000069	3	146	3	+	144	Hypothetical protein	- none -
ND	fig|273384.16.peg.2272	BAURA63_02303	2	BAURA63	3	CDS	FXYZ01000009	152	3	-2	-	150	Hypothetical protein	- none -
ND	fig|273384.16.peg.3809	BAURA63_03866	2	BAURA63	3	CDS	FXYZ01000088	125	3	-2	-	123	Hypothetical protein	- none -
ND	fig|273384.16.peg.3781	BAURA63_03838	2	BAURA63	100	CDS	FXYZ01000073	100	624	1	+	525	Hypothetical protein	- none -
ND	fig|273384.16.peg.3769	BAURA63_03826	2	BAURA63	161	CDS	FXYZ01000067	161	382	2	+	222	Hypothetical protein	- none -
ND	fig|273384.16.peg.3810	BAURA63_03867	2	BAURA63	322	CDS	FXYZ01000088	522	322	-3	-	201	Hypothetical protein	- none -
ND	fig|273384.16.peg.3613	BAURA63_03665	2	BAURA63	485	CDS	FXYZ01000035	485	625	2	+	141	Hypothetical protein	- none -
ND	fig|273384.16.peg.3800	BAURA63_03857	2	BAURA63	547	CDS	FXYZ01000082	951	547	-3	-	405	Hypothetical protein	- none -
ND	fig|273384.16.peg.3789	BAURA63_03846	2	BAURA63	592	CDS	FXYZ01000076	1305	592	-3	-	714	Hypothetical protein	- none -
ND	fig|273384.16.peg.3804	BAURA63_03861	2	BAURA63	754	CDS	FXYZ01000085	1122	754	-3	-	369	Hypothetical protein	- none -
ND	fig|273384.16.peg.3786	BAURA63_03843	2	BAURA63	945	CDS	FXYZ01000074	945	1127	3	+	183	Hypothetical protein	- none -
ND	fig|273384.16.peg.3225	BAURA63_03274	2	BAURA63	1037	CDS	FXYZ01000020	1037	1405	2	+	369	Hypothetical protein	- none -
ND	fig|273384.16.peg.3794	BAURA63_03851	2	BAURA63	1053	CDS	FXYZ01000079	1247	1053	-2	-	195	Hypothetical protein	- none -
ND	fig|273384.16.peg.3645	BAURA63_03697	2	BAURA63	1218	CDS	FXYZ01000038	1218	1424	3	+	207	Hypothetical protein	- none -
ND	fig|273384.16.peg.3776	BAURA63_03833	2	BAURA63	1469	CDS	FXYZ01000069	1469	1621	2	+	153	Hypothetical protein	- none -
ND	fig|273384.16.peg.3707	BAURA63_03761	2	BAURA63	1568	CDS	FXYZ01000047	2146	1568	-1	-	579	Hypothetical protein	- none -
ND	fig|273384.16.peg.3606	BAURA63_03658	2	BAURA63	1663	CDS	FXYZ01000034	2898	1663	-3	-	1236	Hypothetical protein	- none -
ND	fig|273384.16.peg.3646	BAURA63_03698	2	BAURA63	1710	CDS	FXYZ01000038	1710	2096	3	+	387	Hypothetical protein	- none -
ND	fig|273384.16.peg.3687	BAURA63_03741	2	BAURA63	1740	CDS	FXYZ01000043	3368	1740	-2	-	1629	Hypothetical protein	- none -
ND	fig|273384.16.peg.2524	BAURA63_02562	2	BAURA63	1763	CDS	FXYZ01000011	1763	1954	2	+	192	Hypothetical protein	- none -
ND	fig|273384.16.peg.3358	BAURA63_03407	2	BAURA63	1861	CDS	FXYZ01000023	2040	1861	-3	-	180	Hypothetical protein	- none -
ND	fig|273384.16.peg.3703	BAURA63_03757	2	BAURA63	1885	CDS	FXYZ01000046	1885	2439	1	+	555	Hypothetical protein	- none -
ND	fig|273384.16.peg.3708	BAURA63_03762	2	BAURA63	2143	CDS	FXYZ01000047	4728	2143	-3	-	2586	Hypothetical protein	- none -
ND	fig|273384.16.peg.3722	BAURA63_03776	2	BAURA63	2422	CDS	FXYZ01000050	2422	3042	1	+	621	Hypothetical protein	- none -
ND	fig|273384.16.peg.2525	BAURA63_02563	2	BAURA63	2496	CDS	FXYZ01000011	3014	2496	-2	-	519	Hypothetical protein	- none -
ND	fig|273384.16.peg.3439	BAURA63_03488	2	BAURA63	2638	CDS	FXYZ01000026	2853	2638	-3	-	216	Hypothetical protein	- none -
ND	fig|273384.16.peg.3616	BAURA63_03668	2	BAURA63	2939	CDS	FXYZ01000035	3529	2939	-1	-	591	Hypothetical protein	- none -
ND	fig|273384.16.peg.3274	BAURA63_03323	2	BAURA63	2944	CDS	FXYZ01000021	3720	2944	-3	-	777	Hypothetical protein	- none -
ND	fig|273384.16.peg.2526	BAURA63_02564	2	BAURA63	2995	CDS	FXYZ01000011	3933	2995	-3	-	939	Hypothetical protein	- none -
ND	fig|273384.16.peg.3440	BAURA63_03489	2	BAURA63	3111	CDS	FXYZ01000026	3323	3111	-2	-	213	Hypothetical protein	- none -
ND	fig|273384.16.peg.3688	BAURA63_03742	2	BAURA63	3458	CDS	FXYZ01000043	4954	3458	-1	-	1497	Hypothetical protein	- none -
ND	fig|273384.16.peg.3441	BAURA63_03490	2	BAURA63	3852	CDS	FXYZ01000026	3852	4568	3	+	717	Hypothetical protein	- none -
ND	fig|273384.16.peg.3727	BAURA63_03781	2	BAURA63	3954	CDS	FXYZ01000051	3954	4373	3	+	420	Hypothetical protein	- none -
ND	fig|273384.16.peg.2527	BAURA63_02565	2	BAURA63	4079	CDS	FXYZ01000011	4204	4079	-1	-	126	Hypothetical protein	- none -
ND	fig|273384.16.peg.3648	BAURA63_03700	2	BAURA63	4121	CDS	FXYZ01000038	4121	4744	2	+	624	Hypothetical protein	- none -
ND	fig|273384.16.peg.3081	BAURA63_03130	2	BAURA63	4256	CDS	FXYZ01000017	4256	6208	2	+	1953	Hypothetical protein	- none -
ND	fig|273384.16.peg.3442	BAURA63_03491	2	BAURA63	4670	CDS	FXYZ01000026	4918	4670	-1	-	249	Hypothetical protein	- none -
ND	fig|273384.16.peg.3649	BAURA63_03701	2	BAURA63	4885	CDS	FXYZ01000038	4885	5787	1	+	903	Hypothetical protein	- none -
ND	fig|273384.16.peg.3443	BAURA63_03492	2	BAURA63	5201	CDS	FXYZ01000026	5710	5201	-1	-	510	Hypothetical protein	- none -
ND	fig|273384.16.peg.3444	BAURA63_03493	2	BAURA63	5707	CDS	FXYZ01000026	6159	5707	-3	-	453	Hypothetical protein	- none -
ND	fig|273384.16.peg.3650	BAURA63_03702	2	BAURA63	5787	CDS	FXYZ01000038	5787	6617	3	+	831	Hypothetical protein	- none -
ND	fig|273384.16.peg.2529	BAURA63_02567	2	BAURA63	5899	CDS	FXYZ01000011	7626	5899	-3	-	1728	Hypothetical protein	- none -
ND	fig|273384.16.peg.3082	BAURA63_03131	2	BAURA63	6205	CDS	FXYZ01000017	6771	6205	-3	-	567	Hypothetical protein	- none -
ND	fig|273384.16.peg.3446	BAURA63_03495	2	BAURA63	7452	CDS	FXYZ01000026	7452	8093	3	+	642	Hypothetical protein	- none -
ND	fig|273384.16.peg.3610	BAURA63_03662	2	BAURA63	7493	CDS	FXYZ01000034	9595	7493	-1	-	2103	Hypothetical protein	- none -
ND	fig|273384.16.peg.3447	BAURA63_03496	2	BAURA63	8150	CDS	FXYZ01000026	8353	8150	-1	-	204	Hypothetical protein	- none -
ND	fig|273384.16.peg.3277	BAURA63_03326	2	BAURA63	8360	CDS	FXYZ01000021	8752	8360	-1	-	393	Hypothetical protein	- none -
ND	fig|273384.16.peg.3448	BAURA63_03497	2	BAURA63	8696	CDS	FXYZ01000026	8932	8696	-1	-	237	Hypothetical protein	- none -
ND	fig|273384.16.peg.3278	BAURA63_03327	2	BAURA63	8755	CDS	FXYZ01000021	9060	8755	-3	-	306	Hypothetical protein	- none -
ND	fig|273384.16.peg.3449	BAURA63_03498	2	BAURA63	9196	CDS	FXYZ01000026	9522	9196	-3	-	327	Hypothetical protein	- none -
ND	fig|273384.16.peg.3450	BAURA63_03499	2	BAURA63	9582	CDS	FXYZ01000026	10070	9582	-2	-	489	Hypothetical protein	- none -
ND	fig|273384.16.peg.3611	BAURA63_03663	2	BAURA63	9592	CDS	FXYZ01000034	11415	9592	-3	-	1824	Hypothetical protein	- none -
ND	fig|273384.16.peg.3232	BAURA63_03281	2	BAURA63	9604	CDS	FXYZ01000020	9798	9604	-3	-	195	Hypothetical protein	- none -
ND	fig|273384.16.peg.3451	BAURA63_03500	2	BAURA63	10235	CDS	FXYZ01000026	10235	10618	2	+	384	Hypothetical protein	- none -
ND	fig|273384.16.peg.2402	BAURA63_02436	2	BAURA63	10442	CDS	FXYZ01000010	10960	10442	-1	-	519	Hypothetical protein	- none -
ND	fig|273384.16.peg.3452	BAURA63_03501	2	BAURA63	10746	CDS	FXYZ01000026	11102	10746	-2	-	357	Hypothetical protein	- none -
ND	fig|273384.16.peg.2403	BAURA63_02437	2	BAURA63	11002	CDS	FXYZ01000010	11002	11139	1	+	138	Hypothetical protein	- none -
ND	fig|273384.16.peg.3453	BAURA63_03502	2	BAURA63	11134	CDS	FXYZ01000026	12864	11134	-3	-	1731	Hypothetical protein	- none -
ND	fig|273384.16.peg.3454	BAURA63_03503	2	BAURA63	13144	CDS	FXYZ01000026	13476	13144	-3	-	333	Hypothetical protein	- none -
ND	fig|273384.16.peg.3530	BAURA63_03579	2	BAURA63	13422	CDS	FXYZ01000029	14024	13422	-2	-	603	Hypothetical protein	- none -
ND	fig|273384.16.peg.3455	BAURA63_03504	2	BAURA63	13570	CDS	FXYZ01000026	13965	13570	-3	-	396	Hypothetical protein	- none -
ND	fig|273384.16.peg.2407	BAURA63_02441	2	BAURA63	13665	CDS	FXYZ01000010	13665	13931	3	+	267	Hypothetical protein	- none -
ND	fig|273384.16.peg.3456	BAURA63_03505	2	BAURA63	14086	CDS	FXYZ01000026	14400	14086	-3	-	315	Hypothetical protein	- none -
ND	fig|273384.16.peg.3457	BAURA63_03506	2	BAURA63	14459	CDS	FXYZ01000026	14815	14459	-1	-	357	Hypothetical protein	- none -
ND	fig|273384.16.peg.3458	BAURA63_03507	2	BAURA63	14941	CDS	FXYZ01000026	15144	14941	-3	-	204	Hypothetical protein	- none -
ND	fig|273384.16.peg.3459	BAURA63_03508	2	BAURA63	15227	CDS	FXYZ01000026	15502	15227	-1	-	276	Hypothetical protein	- none -
ND	fig|273384.16.peg.3460	BAURA63_03509	2	BAURA63	15663	CDS	FXYZ01000026	16106	15663	-2	-	444	Hypothetical protein	- none -
ND	fig|273384.16.peg.2538	BAURA63_02576	2	BAURA63	16959	CDS	FXYZ01000011	17600	16959	-2	-	642	Hypothetical protein	- none -
ND	fig|273384.16.peg.3463	BAURA63_03512	2	BAURA63	18094	CDS	FXYZ01000026	18366	18094	-3	-	273	Hypothetical protein	- none -
ND	fig|273384.16.peg.3464	BAURA63_03513	2	BAURA63	18370	CDS	FXYZ01000026	18618	18370	-3	-	249	Hypothetical protein	- none -
ND	fig|273384.16.peg.3559	BAURA63_03611	2	BAURA63	18392	CDS	FXYZ01000030	18392	18553	2	+	162	Hypothetical protein	- none -
ND	fig|273384.16.peg.3465	BAURA63_03514	2	BAURA63	18730	CDS	FXYZ01000026	19281	18730	-3	-	552	Hypothetical protein	- none -
ND	fig|273384.16.peg.3466	BAURA63_03515	2	BAURA63	19382	CDS	FXYZ01000026	19642	19382	-1	-	261	Hypothetical protein	- none -
ND	fig|273384.16.peg.3467	BAURA63_03516	2	BAURA63	19787	CDS	FXYZ01000026	20101	19787	-1	-	315	Hypothetical protein	- none -
ND	fig|273384.16.peg.3468	BAURA63_03517	2	BAURA63	20226	CDS	FXYZ01000026	20564	20226	-2	-	339	Hypothetical protein	- none -
ND	fig|273384.16.peg.524	BAURA63_00531	2	BAURA63	20265	CDS	FXYZ01000002	20441	20265	-2	-	177	Hypothetical protein	- none -
ND	fig|273384.16.peg.3469	BAURA63_03518	2	BAURA63	20623	CDS	FXYZ01000026	20967	20623	-3	-	345	Hypothetical protein	- none -
ND	fig|273384.16.peg.3470	BAURA63_03519	2	BAURA63	21150	CDS	FXYZ01000026	21512	21150	-2	-	363	Hypothetical protein	- none -
ND	fig|273384.16.peg.526	BAURA63_00533	2	BAURA63	21675	CDS	FXYZ01000002	22646	21675	-2	-	972	Hypothetical protein	- none -
ND	fig|273384.16.peg.3471	BAURA63_03520	2	BAURA63	21696	CDS	FXYZ01000026	22241	21696	-2	-	546	Hypothetical protein	- none -
ND	fig|273384.16.peg.3472	BAURA63_03521	2	BAURA63	22238	CDS	FXYZ01000026	22777	22238	-1	-	540	Hypothetical protein	- none -
ND	fig|273384.16.peg.3473	BAURA63_03522	2	BAURA63	22856	CDS	FXYZ01000026	23149	22856	-1	-	294	Hypothetical protein	- none -
ND	fig|273384.16.peg.3095	BAURA63_03144	2	BAURA63	23001	CDS	FXYZ01000017	23001	23522	3	+	522	Hypothetical protein	- none -
ND	fig|273384.16.peg.3474	BAURA63_03523	2	BAURA63	23302	CDS	FXYZ01000026	23580	23302	-3	-	279	Hypothetical protein	- none -
ND	fig|273384.16.peg.3096	BAURA63_03145	2	BAURA63	23558	CDS	FXYZ01000017	23797	23558	-1	-	240	Hypothetical protein	- none -
ND	fig|273384.16.peg.3475	BAURA63_03524	2	BAURA63	23698	CDS	FXYZ01000026	24243	23698	-3	-	546	Hypothetical protein	- none -
ND	fig|273384.16.peg.3097	BAURA63_03146	2	BAURA63	23794	CDS	FXYZ01000017	24018	23794	-3	-	225	Hypothetical protein	- none -
ND	fig|273384.16.peg.3098	BAURA63_03147	2	BAURA63	24015	CDS	FXYZ01000017	24950	24015	-2	-	936	Hypothetical protein	- none -
ND	fig|273384.16.peg.3476	BAURA63_03525	2	BAURA63	24420	CDS	FXYZ01000026	24842	24420	-2	-	423	Hypothetical protein	- none -
ND	fig|273384.16.peg.3477	BAURA63_03526	2	BAURA63	25016	CDS	FXYZ01000026	25360	25016	-1	-	345	Hypothetical protein	- none -
ND	fig|273384.16.peg.3478	BAURA63_03527	2	BAURA63	25403	CDS	FXYZ01000026	25954	25403	-1	-	552	Hypothetical protein	- none -
ND	fig|273384.16.peg.3100	BAURA63_03149	2	BAURA63	25949	CDS	FXYZ01000017	26500	25949	-1	-	552	Hypothetical protein	- none -
ND	fig|273384.16.peg.3479	BAURA63_03528	2	BAURA63	26221	CDS	FXYZ01000026	26221	26424	1	+	204	Hypothetical protein	- none -
ND	fig|273384.16.peg.3480	BAURA63_03529	2	BAURA63	26568	CDS	FXYZ01000026	26568	27038	3	+	471	Hypothetical protein	- none -
ND	fig|273384.16.peg.3102	BAURA63_03151	2	BAURA63	29331	CDS	FXYZ01000017	29774	29331	-2	-	444	Hypothetical protein	- none -
ND	fig|273384.16.peg.3105	BAURA63_03154	2	BAURA63	30588	CDS	FXYZ01000017	30848	30588	-2	-	261	Hypothetical protein	- none -
ND	fig|273384.16.peg.3384	BAURA63_03433	2	BAURA63	34075	CDS	FXYZ01000023	34284	34075	-3	-	210	Hypothetical protein	- none -
ND	fig|273384.16.peg.3109	BAURA63_03158	2	BAURA63	34184	CDS	FXYZ01000017	35008	34184	-1	-	825	Hypothetical protein	- none -
ND	fig|273384.16.peg.3111	BAURA63_03160	2	BAURA63	35700	CDS	FXYZ01000017	36389	35700	-2	-	690	Hypothetical protein	- none -
ND	fig|273384.16.peg.3113	BAURA63_03162	2	BAURA63	37754	CDS	FXYZ01000017	38542	37754	-1	-	789	Hypothetical protein	- none -
ND	fig|273384.16.peg.3114	BAURA63_03163	2	BAURA63	38784	CDS	FXYZ01000017	38784	39119	3	+	336	Hypothetical protein	- none -
ND	fig|273384.16.peg.3116	BAURA63_03165	2	BAURA63	40262	CDS	FXYZ01000017	40262	40603	2	+	342	Hypothetical protein	- none -
ND	fig|273384.16.peg.3117	BAURA63_03166	2	BAURA63	40600	CDS	FXYZ01000017	40600	41193	1	+	594	Hypothetical protein	- none -
ND	fig|273384.16.peg.3118	BAURA63_03167	2	BAURA63	41197	CDS	FXYZ01000017	41197	43785	1	+	2589	Hypothetical protein	- none -
ND	fig|273384.16.peg.3121	BAURA63_03170	2	BAURA63	47106	CDS	FXYZ01000017	47106	47663	3	+	558	Hypothetical protein	- none -
ND	fig|273384.16.peg.3123	BAURA63_03172	2	BAURA63	50205	CDS	FXYZ01000017	50205	50441	3	+	237	Hypothetical protein	- none -
ND	fig|273384.16.peg.3124	BAURA63_03173	2	BAURA63	50444	CDS	FXYZ01000017	50444	50746	2	+	303	Hypothetical protein	- none -
ND	fig|273384.16.peg.3126	BAURA63_03175	2	BAURA63	51749	CDS	FXYZ01000017	52126	51749	-1	-	378	Hypothetical protein	- none -
ND	fig|273384.16.peg.3127	BAURA63_03176	2	BAURA63	52362	CDS	FXYZ01000017	52622	52362	-2	-	261	Hypothetical protein	- none -
ND	fig|273384.16.peg.3128	BAURA63_03177	2	BAURA63	52640	CDS	FXYZ01000017	53839	52640	-1	-	1200	Hypothetical protein	- none -
ND	fig|273384.16.peg.3129	BAURA63_03178	2	BAURA63	53856	CDS	FXYZ01000017	54239	53856	-2	-	384	Hypothetical protein	- none -
ND	fig|273384.16.peg.3131	BAURA63_03180	2	BAURA63	55325	CDS	FXYZ01000017	55501	55325	-1	-	177	Hypothetical protein	- none -
ND	fig|273384.16.peg.3132	BAURA63_03181	2	BAURA63	55498	CDS	FXYZ01000017	56034	55498	-3	-	537	Hypothetical protein	- none -
ND	fig|273384.16.peg.2609	BAURA63_02647	2	BAURA63	90406	CDS	FXYZ01000011	90406	90954	1	+	549	Hypothetical protein	- none -
ND	fig|273384.16.peg.2193	BAURA63_02224	2	BAURA63	94524	CDS	FXYZ01000008	94524	94787	3	+	264	Hypothetical protein	- none -
ND	fig|273384.16.peg.2840	BAURA63_02882	2	BAURA63	108823	CDS	FXYZ01000013	108823	109392	1	+	570	Hypothetical protein	- none -
ND	fig|273384.16.peg.1504	BAURA63_01529	2	BAURA63	113420	CDS	FXYZ01000005	113701	113420	-1	-	282	Hypothetical protein	- none -
ND	fig|273384.16.peg.2384	BAURA63_02418	2	BAURA63	129331	CDS	FXYZ01000009	130119	129331	-3	-	789	Hypothetical protein	- none -
ND	fig|273384.16.peg.2385	BAURA63_02419	2	BAURA63	130116	CDS	FXYZ01000009	130835	130116	-2	-	720	Hypothetical protein	- none -
ND	fig|273384.16.peg.1547	BAURA63_01572	2	BAURA63	155550	CDS	FXYZ01000005	155550	155846	3	+	297	Hypothetical protein	- none -
ND	fig|273384.16.peg.1277	BAURA63_01296	2	BAURA63	193019	CDS	FXYZ01000004	193019	193177	2	+	159	Hypothetical protein	- none -
ND	fig|273384.16.peg.1278	BAURA63_01297	2	BAURA63	193190	CDS	FXYZ01000004	193190	193642	2	+	453	Hypothetical protein	- none -
ND	fig|273384.16.peg.1279	BAURA63_01298	2	BAURA63	193632	CDS	FXYZ01000004	193632	193961	3	+	330	Hypothetical protein	- none -
ND	fig|273384.16.peg.1282	BAURA63_01301	2	BAURA63	196734	CDS	FXYZ01000004	196734	196874	3	+	141	Hypothetical protein	- none -
ND	fig|273384.16.peg.1283	BAURA63_01302	2	BAURA63	196895	CDS	FXYZ01000004	196895	197125	2	+	231	Hypothetical protein	- none -
ND	fig|273384.16.peg.1284	BAURA63_01303	2	BAURA63	197742	CDS	FXYZ01000004	198248	197742	-2	-	507	Hypothetical protein	- none -
ND	fig|273384.16.peg.987	BAURA63_01000	2	BAURA63	207928	CDS	FXYZ01000003	207928	208290	1	+	363	Hypothetical protein	- none -
ND	fig|273384.16.peg.991	BAURA63_01004	2	BAURA63	209923	CDS	FXYZ01000003	209923	210972	1	+	1050	Hypothetical protein	- none -
ND	fig|273384.16.peg.736	BAURA63_00747	2	BAURA63	257939	CDS	FXYZ01000002	257939	258973	2	+	1035	Hypothetical protein	- none -
ND	fig|273384.15.peg.4057	BAURA86_04114	6	BAURA86	1	CDS	FXZI01000079	228	1	-3	-	228	Hypothetical protein	- none -
ND	fig|273384.15.peg.4089	BAURA86_04146	6	BAURA86	1	CDS	FXZI01000096	135	1	-3	-	135	Hypothetical protein	- none -
ND	fig|273384.15.peg.4042	BAURA86_04099	6	BAURA86	1	CDS	FXZI01000072	453	1	-3	-	453	Hypothetical protein	- none -
ND	fig|273384.15.peg.4072	BAURA86_04129	6	BAURA86	1	CDS	FXZI01000086	228	1	-3	-	228	Hypothetical protein	- none -
ND	fig|273384.15.peg.4084	BAURA86_04141	6	BAURA86	1	CDS	FXZI01000093	1	630	1	+	630	Hypothetical protein	- none -
ND	fig|273384.15.peg.1840	BAURA86_01871	6	BAURA86	3	CDS	FXZI01000006	3	458	3	+	456	Hypothetical protein	- none -
ND	fig|273384.15.peg.4031	BAURA86_04088	6	BAURA86	3	CDS	FXZI01000067	152	3	-2	-	150	Hypothetical protein	- none -
ND	fig|273384.15.peg.4053	BAURA86_04110	6	BAURA86	3	CDS	FXZI01000077	3	599	3	+	597	Hypothetical protein	- none -
ND	fig|273384.15.peg.4070	BAURA86_04127	6	BAURA86	3	CDS	FXZI01000085	179	3	-2	-	177	Hypothetical protein	- none -
ND	fig|273384.15.peg.2441	BAURA86_02480	6	BAURA86	21	CDS	FXZI01000009	21	392	3	+	372	Hypothetical protein	- none -
ND	fig|273384.15.peg.4045	BAURA86_04102	6	BAURA86	171	CDS	FXZI01000073	308	171	-2	-	138	Hypothetical protein	- none -
ND	fig|273384.15.peg.2935	BAURA86_02979	6	BAURA86	208	CDS	FXZI01000012	345	208	-3	-	138	Hypothetical protein	- none -
ND	fig|273384.15.peg.4041	BAURA86_04098	6	BAURA86	265	CDS	FXZI01000071	265	1191	1	+	927	Hypothetical protein	- none -
ND	fig|273384.15.peg.4007	BAURA86_04064	6	BAURA86	355	CDS	FXZI01000055	945	355	-3	-	591	Hypothetical protein	- none -
ND	fig|273384.15.peg.2936	BAURA86_02980	6	BAURA86	365	CDS	FXZI01000012	514	365	-1	-	150	Hypothetical protein	- none -
ND	fig|273384.15.peg.1377	BAURA86_01398	6	BAURA86	457	CDS	FXZI01000004	666	457	-3	-	210	Hypothetical protein	- none -
ND	fig|273384.15.peg.4080	BAURA86_04137	6	BAURA86	539	CDS	FXZI01000090	1030	539	-1	-	492	Hypothetical protein	- none -
ND	fig|273384.15.peg.4043	BAURA86_04100	6	BAURA86	541	CDS	FXZI01000072	1173	541	-3	-	633	Hypothetical protein	- none -
ND	fig|273384.15.peg.3178	BAURA86_03222	6	BAURA86	634	CDS	FXZI01000014	634	963	1	+	330	Hypothetical protein	- none -
ND	fig|273384.15.peg.4085	BAURA86_04142	6	BAURA86	640	CDS	FXZI01000093	640	1020	1	+	381	Hypothetical protein	- none -
ND	fig|273384.15.peg.2613	BAURA86_02653	6	BAURA86	651	CDS	FXZI01000010	651	935	3	+	285	Hypothetical protein	- none -
ND	fig|273384.15.peg.4054	BAURA86_04111	6	BAURA86	678	CDS	FXZI01000077	1055	678	-2	-	378	Hypothetical protein	- none -
ND	fig|273384.15.peg.3973	BAURA86_04029	6	BAURA86	685	CDS	FXZI01000039	685	837	1	+	153	Hypothetical protein	- none -
ND	fig|273384.15.peg.3977	BAURA86_04034	6	BAURA86	708	CDS	FXZI01000040	1193	708	-2	-	486	Hypothetical protein	- none -
ND	fig|273384.15.peg.1378	BAURA86_01399	6	BAURA86	744	CDS	FXZI01000004	1520	744	-2	-	777	Hypothetical protein	- none -
ND	fig|273384.15.peg.4069	BAURA86_04126	6	BAURA86	822	CDS	FXZI01000084	1091	822	-2	-	270	Hypothetical protein	- none -
ND	fig|273384.15.peg.4088	BAURA86_04145	6	BAURA86	882	CDS	FXZI01000095	882	1010	3	+	129	Hypothetical protein	- none -
ND	fig|273384.15.peg.4060	BAURA86_04117	6	BAURA86	909	CDS	FXZI01000080	909	1097	3	+	189	Hypothetical protein	- none -
ND	fig|273384.15.peg.4063	BAURA86_04120	6	BAURA86	918	CDS	FXZI01000081	1097	918	-2	-	180	Hypothetical protein	- none -
ND	fig|273384.15.peg.3896	BAURA86_03949	6	BAURA86	1357	CDS	FXZI01000028	1815	1357	-3	-	459	Hypothetical protein	- none -
ND	fig|273384.15.peg.1379	BAURA86_01400	6	BAURA86	1675	CDS	FXZI01000004	2247	1675	-3	-	573	Hypothetical protein	- none -
ND	fig|273384.15.peg.3979	BAURA86_04036	6	BAURA86	2134	CDS	FXZI01000040	2559	2134	-3	-	426	Hypothetical protein	- none -
ND	fig|273384.15.peg.3914	BAURA86_03967	6	BAURA86	2508	CDS	FXZI01000029	2508	2732	3	+	225	Hypothetical protein	- none -
ND	fig|273384.15.peg.1381	BAURA86_01402	6	BAURA86	3185	CDS	FXZI01000004	3185	3436	2	+	252	Hypothetical protein	- none -
ND	fig|273384.15.peg.3863	BAURA86_03916	6	BAURA86	3517	CDS	FXZI01000026	3517	4767	1	+	1251	Hypothetical protein	- none -
ND	fig|273384.15.peg.1382	BAURA86_01403	6	BAURA86	3629	CDS	FXZI01000004	4156	3629	-1	-	528	Hypothetical protein	- none -
ND	fig|273384.15.peg.1844	BAURA86_01875	6	BAURA86	3767	CDS	FXZI01000006	4090	3767	-1	-	324	Hypothetical protein	- none -
ND	fig|273384.15.peg.3936	BAURA86_03989	6	BAURA86	3954	CDS	FXZI01000030	3954	4088	3	+	135	Hypothetical protein	- none -
ND	fig|273384.15.peg.3592	BAURA86_03641	6	BAURA86	4565	CDS	FXZI01000019	4729	4565	-1	-	165	Hypothetical protein	- none -
ND	fig|273384.15.peg.3394	BAURA86_03441	6	BAURA86	4795	CDS	FXZI01000016	4795	5349	1	+	555	Hypothetical protein	- none -
ND	fig|273384.15.peg.2780	BAURA86_02820	6	BAURA86	5504	CDS	FXZI01000011	5668	5504	-1	-	165	Hypothetical protein	- none -
ND	fig|273384.15.peg.2446	BAURA86_02485	6	BAURA86	5669	CDS	FXZI01000009	6862	5669	-1	-	1194	Hypothetical protein	- none -
ND	fig|273384.15.peg.2781	BAURA86_02821	6	BAURA86	5784	CDS	FXZI01000011	5784	6050	3	+	267	Hypothetical protein	- none -
ND	fig|273384.15.peg.570	BAURA86_00582	6	BAURA86	5787	CDS	FXZI01000002	6335	5787	-2	-	549	Hypothetical protein	- none -
ND	fig|273384.15.peg.1385	BAURA86_01406	6	BAURA86	5816	CDS	FXZI01000004	5816	7045	2	+	1230	Hypothetical protein	- none -
ND	fig|273384.15.peg.3950	BAURA86_04003	6	BAURA86	5873	CDS	FXZI01000032	6142	5873	-1	-	270	Hypothetical protein	- none -
ND	fig|273384.15.peg.3881	BAURA86_03934	6	BAURA86	6204	CDS	FXZI01000027	6455	6204	-2	-	252	Hypothetical protein	- none -
ND	fig|273384.15.peg.3797	BAURA86_03847	6	BAURA86	6687	CDS	FXZI01000024	6687	7673	3	+	987	Hypothetical protein	- none -
ND	fig|273384.15.peg.2447	BAURA86_02486	6	BAURA86	6895	CDS	FXZI01000009	8193	6895	-3	-	1299	Hypothetical protein	- none -
ND	fig|273384.15.peg.3883	BAURA86_03936	6	BAURA86	7088	CDS	FXZI01000027	7282	7088	-1	-	195	Hypothetical protein	- none -
ND	fig|273384.15.peg.3884	BAURA86_03937	6	BAURA86	7279	CDS	FXZI01000027	7614	7279	-3	-	336	Hypothetical protein	- none -
ND	fig|273384.15.peg.2783	BAURA86_02823	6	BAURA86	7567	CDS	FXZI01000011	7989	7567	-3	-	423	Hypothetical protein	- none -
ND	fig|273384.15.peg.2449	BAURA86_02488	6	BAURA86	9012	CDS	FXZI01000009	10298	9012	-2	-	1287	Hypothetical protein	- none -
ND	fig|273384.15.peg.2450	BAURA86_02489	6	BAURA86	10315	CDS	FXZI01000009	11220	10315	-3	-	906	Hypothetical protein	- none -
ND	fig|273384.15.peg.1390	BAURA86_01411	6	BAURA86	11153	CDS	FXZI01000004	11153	11701	2	+	549	Hypothetical protein	- none -
ND	fig|273384.15.peg.2451	BAURA86_02490	6	BAURA86	11220	CDS	FXZI01000009	11396	11220	-2	-	177	Hypothetical protein	- none -
ND	fig|273384.15.peg.1391	BAURA86_01412	6	BAURA86	11970	CDS	FXZI01000004	11970	12515	3	+	546	Hypothetical protein	- none -
ND	fig|273384.15.peg.1392	BAURA86_01413	6	BAURA86	12617	CDS	FXZI01000004	13891	12617	-1	-	1275	Hypothetical protein	- none -
ND	fig|273384.15.peg.1393	BAURA86_01414	6	BAURA86	13888	CDS	FXZI01000004	14136	13888	-3	-	249	Hypothetical protein	- none -
ND	fig|273384.15.peg.1394	BAURA86_01415	6	BAURA86	14174	CDS	FXZI01000004	14215	14174	-1	-	42	Hypothetical protein	- none -
ND	fig|273384.15.peg.579	BAURA86_00591	6	BAURA86	14882	CDS	FXZI01000002	14882	15274	2	+	393	Hypothetical protein	- none -
ND	fig|273384.15.peg.3909	BAURA86_03962	6	BAURA86	15439	CDS	FXZI01000028	15439	15642	1	+	204	Hypothetical protein	- none -
ND	fig|273384.15.peg.3893	BAURA86_03946	6	BAURA86	16184	CDS	FXZI01000027	16816	16184	-1	-	633	Hypothetical protein	- none -
ND	fig|273384.15.peg.3894	BAURA86_03947	6	BAURA86	16983	CDS	FXZI01000027	16983	17426	3	+	444	Hypothetical protein	- none -
ND	fig|273384.15.peg.583	BAURA86_00595	6	BAURA86	18150	CDS	FXZI01000002	18150	18803	3	+	654	Hypothetical protein	- none -
ND	fig|273384.15.peg.3846	BAURA86_03899	6	BAURA86	19255	CDS	FXZI01000025	19255	19497	1	+	243	Hypothetical protein	- none -
ND	fig|273384.15.peg.3848	BAURA86_03901	6	BAURA86	22761	CDS	FXZI01000025	22761	23132	3	+	372	Hypothetical protein	- none -
ND	fig|273384.15.peg.3849	BAURA86_03902	6	BAURA86	23158	CDS	FXZI01000025	23158	23502	1	+	345	Hypothetical protein	- none -
ND	fig|273384.15.peg.3850	BAURA86_03903	6	BAURA86	23789	CDS	FXZI01000025	23789	25231	2	+	1443	Hypothetical protein	- none -
ND	fig|273384.15.peg.2464	BAURA86_02503	6	BAURA86	24282	CDS	FXZI01000009	24497	24282	-2	-	216	Hypothetical protein	- none -
ND	fig|273384.15.peg.3852	BAURA86_03905	6	BAURA86	27114	CDS	FXZI01000025	27335	27114	-2	-	222	Hypothetical protein	- none -
ND	fig|273384.15.peg.3853	BAURA86_03906	6	BAURA86	27332	CDS	FXZI01000025	27679	27332	-1	-	348	Hypothetical protein	- none -
ND	fig|273384.15.peg.3855	BAURA86_03908	6	BAURA86	28516	CDS	FXZI01000025	28516	28824	1	+	309	Hypothetical protein	- none -
ND	fig|273384.15.peg.3857	BAURA86_03910	6	BAURA86	29557	CDS	FXZI01000025	29557	29718	1	+	162	Hypothetical protein	- none -
ND	fig|273384.15.peg.3611	BAURA86_03660	6	BAURA86	34134	CDS	FXZI01000019	34134	35357	3	+	1224	Hypothetical protein	- none -
ND	fig|273384.15.peg.3657	BAURA86_03706	6	BAURA86	46397	CDS	FXZI01000020	46837	46397	-1	-	441	Hypothetical protein	- none -
ND	fig|273384.15.peg.630	BAURA86_00642	6	BAURA86	68259	CDS	FXZI01000002	68606	68259	-2	-	348	Hypothetical protein	- none -
ND	fig|273384.15.peg.631	BAURA86_00643	6	BAURA86	68798	CDS	FXZI01000002	68798	69310	2	+	513	Hypothetical protein	- none -
ND	fig|273384.15.peg.658	BAURA86_00670	6	BAURA86	95135	CDS	FXZI01000002	95135	95299	2	+	165	Hypothetical protein	- none -
ND	fig|273384.15.peg.3389	BAURA86_03436	6	BAURA86	102404	CDS	FXZI01000015	102404	102607	2	+	204	Hypothetical protein	- none -
ND	fig|273384.15.peg.2344	BAURA86_02383	6	BAURA86	107748	CDS	FXZI01000008	108326	107748	-2	-	579	Hypothetical protein	- none -
ND	fig|273384.15.peg.2347	BAURA86_02386	6	BAURA86	111545	CDS	FXZI01000008	111545	111691	2	+	147	Hypothetical protein	- none -
ND	fig|273384.15.peg.1738	BAURA86_01766	6	BAURA86	129650	CDS	FXZI01000005	130042	129650	-1	-	393	Hypothetical protein	- none -
ND	fig|273384.15.peg.1741	BAURA86_01769	6	BAURA86	132083	CDS	FXZI01000005	132955	132083	-1	-	873	Hypothetical protein	- none -
ND	fig|273384.15.peg.1743	BAURA86_01771	6	BAURA86	134906	CDS	FXZI01000005	135289	134906	-1	-	384	Hypothetical protein	- none -
ND	fig|273384.15.peg.2910	BAURA86_02954	6	BAURA86	146374	CDS	FXZI01000011	146374	146661	1	+	288	Hypothetical protein	- none -
ND	fig|273384.15.peg.1754	BAURA86_01782	6	BAURA86	148696	CDS	FXZI01000005	149175	148696	-3	-	480	Hypothetical protein	- none -
ND	fig|273384.15.peg.1755	BAURA86_01783	6	BAURA86	149172	CDS	FXZI01000005	149828	149172	-2	-	657	Hypothetical protein	- none -
ND	fig|273384.15.peg.1757	BAURA86_01785	6	BAURA86	150666	CDS	FXZI01000005	151016	150666	-2	-	351	Hypothetical protein	- none -
ND	fig|273384.15.peg.1764	BAURA86_01792	6	BAURA86	156357	CDS	FXZI01000005	156357	156740	3	+	384	Hypothetical protein	- none -
ND	fig|273384.15.peg.1520	BAURA86_01547	6	BAURA86	156855	CDS	FXZI01000004	156855	157502	3	+	648	Hypothetical protein	- none -
ND	fig|273384.15.peg.1773	BAURA86_01801	6	BAURA86	164805	CDS	FXZI01000005	164805	165581	3	+	777	Hypothetical protein	- none -
ND	fig|273384.15.peg.1775	BAURA86_01803	6	BAURA86	167082	CDS	FXZI01000005	167082	167639	3	+	558	Hypothetical protein	- none -
ND	fig|273384.15.peg.1778	BAURA86_01806	6	BAURA86	170006	CDS	FXZI01000005	170006	170602	2	+	597	Hypothetical protein	- none -
ND	fig|273384.15.peg.1779	BAURA86_01807	6	BAURA86	170613	CDS	FXZI01000005	170613	170813	3	+	201	Hypothetical protein	- none -
ND	fig|273384.15.peg.2016	BAURA86_02050	6	BAURA86	187816	CDS	FXZI01000006	187816	188820	1	+	1005	Hypothetical protein	- none -
ND	fig|273384.15.peg.2020	BAURA86_02054	6	BAURA86	191346	CDS	FXZI01000006	191346	192860	3	+	1515	Hypothetical protein	- none -
ND	fig|273384.15.peg.1595	BAURA86_01622	6	BAURA86	222175	CDS	FXZI01000004	222175	222321	1	+	147	Hypothetical protein	- none -
ND	fig|273384.15.peg.1830	BAURA86_01861	6	BAURA86	232687	CDS	FXZI01000005	232687	233139	1	+	453	Hypothetical protein	- none -
ND	fig|273384.15.peg.2056	BAURA86_02090	6	BAURA86	232993	CDS	FXZI01000006	232993	233964	1	+	972	Hypothetical protein	- none -
ND	fig|273384.15.peg.1831	BAURA86_01862	6	BAURA86	233160	CDS	FXZI01000005	233160	233537	3	+	378	Hypothetical protein	- none -
ND	fig|273384.15.peg.1610	BAURA86_01637	6	BAURA86	234957	CDS	FXZI01000004	234957	235712	3	+	756	Hypothetical protein	- none -
ND	fig|273384.15.peg.1612	BAURA86_01639	6	BAURA86	237997	CDS	FXZI01000004	237997	238146	1	+	150	Hypothetical protein	- none -
ND	fig|273384.15.peg.1837	BAURA86_01868	6	BAURA86	238610	CDS	FXZI01000005	239707	238610	-1	-	1098	Hypothetical protein	- none -
ND	fig|273384.15.peg.1838	BAURA86_01869	6	BAURA86	240239	CDS	FXZI01000005	240239	241102	2	+	864	Hypothetical protein	- none -
ND	fig|273384.15.peg.1614	BAURA86_01641	6	BAURA86	241296	CDS	FXZI01000004	241296	241811	3	+	516	Hypothetical protein	- none -
ND	fig|273384.15.peg.1615	BAURA86_01642	6	BAURA86	241786	CDS	FXZI01000004	241786	242643	1	+	858	Hypothetical protein	- none -
ND	fig|273384.15.peg.1616	BAURA86_01643	6	BAURA86	242640	CDS	FXZI01000004	242640	243326	3	+	687	Hypothetical protein	- none -
ND	fig|273384.15.peg.1618	BAURA86_01645	6	BAURA86	245788	CDS	FXZI01000004	246483	245788	-3	-	696	Hypothetical protein	- none -
ND	fig|273384.15.peg.1620	BAURA86_01647	6	BAURA86	247950	CDS	FXZI01000004	247950	248519	3	+	570	Hypothetical protein	- none -
ND	fig|273384.15.peg.862	BAURA86_00877	6	BAURA86	312701	CDS	FXZI01000002	312904	312701	-1	-	204	Hypothetical protein	- none -
ND	fig|273384.15.peg.864	BAURA86_00879	6	BAURA86	313539	CDS	FXZI01000002	314000	313539	-2	-	462	Hypothetical protein	- none -
ND	fig|273384.15.peg.866	BAURA86_00881	6	BAURA86	315856	CDS	FXZI01000002	316389	315856	-3	-	534	Hypothetical protein	- none -
ND	fig|273384.15.peg.868	BAURA86_00883	6	BAURA86	317876	CDS	FXZI01000002	318700	317876	-1	-	825	Hypothetical protein	- none -
ND	fig|273384.15.peg.869	BAURA86_00884	6	BAURA86	318905	CDS	FXZI01000002	319843	318905	-1	-	939	Hypothetical protein	- none -
ND	fig|273384.15.peg.876	BAURA86_00891	6	BAURA86	325479	CDS	FXZI01000002	326168	325479	-2	-	690	Hypothetical protein	- none -
ND	fig|273384.15.peg.879	BAURA86_00894	6	BAURA86	328201	CDS	FXZI01000002	328605	328201	-3	-	405	Hypothetical protein	- none -
ND	fig|273384.15.peg.1367	BAURA86_01388	6	BAURA86	335701	CDS	FXZI01000003	335701	336633	1	+	933	Hypothetical protein	- none -
ND	fig|273384.15.peg.890	BAURA86_00905	6	BAURA86	338921	CDS	FXZI01000002	339457	338921	-1	-	537	Hypothetical protein	- none -
ND	fig|273384.15.peg.1370	BAURA86_01391	6	BAURA86	338978	CDS	FXZI01000003	339157	338978	-1	-	180	Hypothetical protein	- none -
ND	fig|273384.15.peg.1372	BAURA86_01393	6	BAURA86	340127	CDS	FXZI01000003	341107	340127	-1	-	981	Hypothetical protein	- none -
ND	fig|273384.15.peg.1373	BAURA86_01394	6	BAURA86	341168	CDS	FXZI01000003	341593	341168	-1	-	426	Hypothetical protein	- none -
ND	fig|273384.15.peg.1375	BAURA86_01396	6	BAURA86	342466	CDS	FXZI01000003	343050	342466	-3	-	585	Hypothetical protein	- none -
ND	fig|273384.15.peg.899	BAURA86_00914	6	BAURA86	349325	CDS	FXZI01000002	349325	350167	2	+	843	Hypothetical protein	- none -
ND	fig|273384.15.peg.902	BAURA86_00917	6	BAURA86	352247	CDS	FXZI01000002	352247	353704	2	+	1458	Hypothetical protein	- none -
ND	fig|273384.15.peg.903	BAURA86_00918	6	BAURA86	353783	CDS	FXZI01000002	354157	353783	-1	-	375	Hypothetical protein	- none -
ND	fig|273384.15.peg.904	BAURA86_00919	6	BAURA86	354289	CDS	FXZI01000002	354289	354672	1	+	384	Hypothetical protein	- none -
ND	fig|273384.15.peg.905	BAURA86_00920	6	BAURA86	354672	CDS	FXZI01000002	354672	355073	3	+	402	Hypothetical protein	- none -
ND	fig|273384.15.peg.907	BAURA86_00922	6	BAURA86	356173	CDS	FXZI01000002	356514	356173	-3	-	342	Hypothetical protein	- none -
ND	fig|273384.15.peg.404	BAURA86_00413	6	BAURA86	455795	CDS	FXZI01000001	455795	456007	2	+	213	Hypothetical protein	- none -
ND	fig|273384.15.peg.406	BAURA86_00415	6	BAURA86	456252	CDS	FXZI01000001	456252	458504	3	+	2253	Hypothetical protein	- none -
ND	fig|273384.15.peg.409	BAURA86_00418	6	BAURA86	460863	CDS	FXZI01000001	461204	460863	-2	-	342	Hypothetical protein	- none -
ND	fig|273384.15.peg.410	BAURA86_00419	6	BAURA86	461621	CDS	FXZI01000001	462235	461621	-1	-	615	Hypothetical protein	- none -
ND	fig|273384.15.peg.440	BAURA86_00451	6	BAURA86	490737	CDS	FXZI01000001	491945	490737	-2	-	1209	Hypothetical protein	- none -
ND	fig|273384.15.peg.458	BAURA86_00469	6	BAURA86	511898	CDS	FXZI01000001	511898	512197	2	+	300	Hypothetical protein	- none -
ND	fig|273384.15.peg.460	BAURA86_00471	6	BAURA86	513423	CDS	FXZI01000001	513423	513776	3	+	354	Hypothetical protein	- none -
ND	fig|273384.15.peg.461	BAURA86_00472	6	BAURA86	513878	CDS	FXZI01000001	514816	513878	-1	-	939	Hypothetical protein	- none -
ND	fig|273384.15.peg.462	BAURA86_00473	6	BAURA86	514803	CDS	FXZI01000001	515672	514803	-2	-	870	Hypothetical protein	- none -
ND	fig|273384.15.peg.465	BAURA86_00476	6	BAURA86	521246	CDS	FXZI01000001	521246	521785	2	+	540	Hypothetical protein	- none -
ND	fig|273384.15.peg.476	BAURA86_00487	6	BAURA86	533406	CDS	FXZI01000001	533406	533867	3	+	462	Hypothetical protein	- none -
ND	fig|273384.15.peg.479	BAURA86_00490	6	BAURA86	535822	CDS	FXZI01000001	535822	536547	1	+	726	Hypothetical protein	- none -
ND	fig|273384.15.peg.485	BAURA86_00496	6	BAURA86	541831	CDS	FXZI01000001	541831	542631	1	+	801	Hypothetical protein	- none -
ND	fig|273384.15.peg.487	BAURA86_00498	6	BAURA86	544127	CDS	FXZI01000001	544127	544579	2	+	453	Hypothetical protein	- none -
ND	fig|273384.15.peg.488	BAURA86_00499	6	BAURA86	544660	CDS	FXZI01000001	544660	545130	1	+	471	Hypothetical protein	- none -
ND	fig|273384.15.peg.1066	BAURA86_01084	6	BAURA86	546066	CDS	FXZI01000002	546066	546683	3	+	618	Hypothetical protein	- none -
ND	fig|273384.15.peg.490	BAURA86_00501	6	BAURA86	547139	CDS	FXZI01000001	547139	547687	2	+	549	Hypothetical protein	- none -
ND	fig|273384.15.peg.492	BAURA86_00503	6	BAURA86	552843	CDS	FXZI01000001	552843	553343	3	+	501	Hypothetical protein	- none -
ND	fig|273384.15.peg.495	BAURA86_00506	6	BAURA86	554914	CDS	FXZI01000001	554914	555330	1	+	417	Hypothetical protein	- none -
ND	fig|273384.15.peg.551	BAURA86_00563	6	BAURA86	616213	CDS	FXZI01000001	616213	616338	1	+	126	Hypothetical protein	- none -
ND	fig|273384.15.peg.564	BAURA86_00576	6	BAURA86	627293	CDS	FXZI01000001	627448	627293	-1	-	156	Hypothetical protein	- none -
ND	fig|1703.41.peg.270	BLSMQ_RS01415	0	BLSMQ	297410	CDS	NZ_CP017150	297410	302176	2	+	4767	Hypothetical protein	- none -
ND	fig|1703.41.peg.275	BLSMQ_RS01440	0	BLSMQ	307790	CDS	NZ_CP017150	307790	309640	2	+	1851	Hypothetical protein	- none -
ND	fig|1703.41.peg.282	BLSMQ_RS01465	0	BLSMQ	319529	CDS	NZ_CP017150	319529	321100	2	+	1572	Hypothetical protein	- none -
ND	fig|1703.41.peg.285	BLSMQ_RS01480	0	BLSMQ	325231	CDS	NZ_CP017150	325231	325974	1	+	744	Hypothetical protein	- none -
ND	fig|1703.41.peg.362	BLSMQ_RS01890	0	BLSMQ	424375	CDS	NZ_CP017150	424375	425031	1	+	657	Hypothetical protein	- none -
ND	fig|1703.41.peg.363	BLSMQ_RS01895	0	BLSMQ	425047	CDS	NZ_CP017150	425256	425047	-3	-	210	Hypothetical protein	- none -
ND	fig|1703.41.peg.364	BLSMQ_RS01900	0	BLSMQ	425321	CDS	NZ_CP017150	425758	425321	-1	-	438	Hypothetical protein	- none -
ND	fig|1703.41.peg.366	BLSMQ_RS19280	0	BLSMQ	427822	CDS	NZ_CP017150	428022	427822	-3	-	201	Hypothetical protein	- none -
ND	fig|1703.41.peg.462	BLSMQ_RS19305	0	BLSMQ	542463	CDS	NZ_CP017150	542463	543887	3	+	1425	Hypothetical protein	- none -
ND	fig|1703.41.peg.463	BLSMQ_RS02410	0	BLSMQ	545744	CDS	NZ_CP017150	546040	545744	-1	-	297	Hypothetical protein	- none -
ND	fig|1703.41.peg.468	BLSMQ_RS02435	0	BLSMQ	552452	CDS	NZ_CP017150	552661	552452	-1	-	210	Hypothetical protein	- none -
ND	fig|1703.41.peg.469	BLSMQ_RS19315	0	BLSMQ	553213	CDS	NZ_CP017150	553401	553213	-3	-	189	Hypothetical protein	- none -
ND	fig|1703.41.peg.472	BLSMQ_RS02455	0	BLSMQ	555555	CDS	NZ_CP017150	555555	556307	3	+	753	Hypothetical protein	- none -
ND	fig|1703.41.peg.473	BLSMQ_RS19320	0	BLSMQ	556304	CDS	NZ_CP017150	556304	558235	2	+	1932	Hypothetical protein	- none -
ND	fig|1703.41.peg.474	BLSMQ_RS02475	0	BLSMQ	559773	CDS	NZ_CP017150	559773	559982	3	+	210	Hypothetical protein	- none -
ND	fig|1703.41.peg.504	BLSMQ_RS02635	0	BLSMQ	589270	CDS	NZ_CP017150	590112	589270	-3	-	843	Hypothetical protein	- none -
ND	fig|1703.41.peg.808	BLSMQ_RS04215	0	BLSMQ	940879	CDS	NZ_CP017150	941247	940879	-3	-	369	Hypothetical protein	- none -
ND	fig|1703.41.peg.912	BLSMQ_RS04755	0	BLSMQ	1047887	CDS	NZ_CP017150	1048228	1047887	-1	-	342	Hypothetical protein	- none -
ND	fig|1703.41.peg.1350	BLSMQ_RS07005	0	BLSMQ	1520723	CDS	NZ_CP017150	1520723	1521322	2	+	600	Hypothetical protein	- none -
ND	fig|1703.41.peg.1364	BLSMQ_RS07075	0	BLSMQ	1536898	CDS	NZ_CP017150	1536898	1537632	1	+	735	Hypothetical protein	- none -
ND	fig|1703.41.peg.1371	BLSMQ_RS19470	0	BLSMQ	1543979	CDS	NZ_CP017150	1543979	1544371	2	+	393	Hypothetical protein	- none -
ND	fig|1703.41.peg.1376	BLSMQ_RS19475	0	BLSMQ	1548407	CDS	NZ_CP017150	1548796	1548407	-1	-	390	Hypothetical protein	- none -
ND	fig|1703.41.peg.1787	BLSMQ_RS09260	0	BLSMQ	2009924	CDS	NZ_CP017150	2010415	2009924	-1	-	492	Hypothetical protein	- none -
ND	fig|1703.41.peg.1890	BLSMQ_RS09815	0	BLSMQ	2123584	CDS	NZ_CP017150	2124750	2123584	-3	-	1167	Hypothetical protein	- none -
ND	fig|1703.41.peg.1892	BLSMQ_RS09825	0	BLSMQ	2125140	CDS	NZ_CP017150	2125478	2125140	-2	-	339	Hypothetical protein	- none -
ND	fig|1703.41.peg.1893	BLSMQ_RS09830	0	BLSMQ	2125480	CDS	NZ_CP017150	2125668	2125480	-3	-	189	Hypothetical protein	- none -
ND	fig|1703.41.peg.1894	BLSMQ_RS09835	0	BLSMQ	2125665	CDS	NZ_CP017150	2125862	2125665	-2	-	198	Hypothetical protein	- none -
ND	fig|1703.41.peg.1895	BLSMQ_RS09840	0	BLSMQ	2125965	CDS	NZ_CP017150	2125965	2126375	3	+	411	Hypothetical protein	- none -
ND	fig|1703.41.peg.1952	BLSMQ_RS10125	0	BLSMQ	2186054	CDS	NZ_CP017150	2186308	2186054	-1	-	255	Hypothetical protein	- none -
ND	fig|1703.41.peg.1956	BLSMQ_RS10165	0	BLSMQ	2190417	CDS	NZ_CP017150	2190417	2190977	3	+	561	Hypothetical protein	- none -
ND	fig|1703.41.peg.1959	BLSMQ_RS10185	0	BLSMQ	2193645	CDS	NZ_CP017150	2193645	2193857	3	+	213	Hypothetical protein	- none -
ND	fig|1703.41.peg.1960	BLSMQ_RS10190	0	BLSMQ	2193915	CDS	NZ_CP017150	2194289	2193915	-2	-	375	Hypothetical protein	- none -
ND	fig|1703.41.peg.1966	BLSMQ_RS10240	0	BLSMQ	2202922	CDS	NZ_CP017150	2202922	2203164	1	+	243	Hypothetical protein	- none -
ND	fig|1703.41.peg.1971	BLSMQ_RS10270	0	BLSMQ	2209000	CDS	NZ_CP017150	2209311	2209000	-3	-	312	Hypothetical protein	- none -
ND	fig|1703.41.peg.1975	BLSMQ_RS10290	0	BLSMQ	2212658	CDS	NZ_CP017150	2213476	2212658	-1	-	819	Hypothetical protein	- none -
ND	fig|1703.41.peg.2332	BLSMQ_RS12130	0	BLSMQ	2624554	CDS	NZ_CP017150	2624554	2625219	1	+	666	Hypothetical protein	- none -
ND	fig|1703.41.peg.2354	BLSMQ_RS12260	0	BLSMQ	2660087	CDS	NZ_CP017150	2660087	2660551	2	+	465	Hypothetical protein	- none -
ND	fig|1703.41.peg.2366	BLSMQ_RS12315	0	BLSMQ	2670594	CDS	NZ_CP017150	2670594	2671316	3	+	723	Hypothetical protein	- none -
ND	fig|1703.41.peg.2380	BLSMQ_RS12390	0	BLSMQ	2693351	CDS	NZ_CP017150	2693351	2694004	2	+	654	Hypothetical protein	- none -
ND	fig|1703.41.peg.2652	BLSMQ_RS13795	0	BLSMQ	3002784	CDS	NZ_CP017150	3003050	3002784	-2	-	267	Hypothetical protein	- none -
ND	fig|1703.41.peg.2659	BLSMQ_RS13830	0	BLSMQ	3011392	CDS	NZ_CP017150	3011392	3012774	1	+	1383	Hypothetical protein	- none -
ND	fig|1703.41.peg.2660	BLSMQ_RS13835	0	BLSMQ	3012983	CDS	NZ_CP017150	3013525	3012983	-1	-	543	Hypothetical protein	- none -
ND	fig|1703.41.peg.2663	BLSMQ_RS13855	0	BLSMQ	3021006	CDS	NZ_CP017150	3021398	3021006	-2	-	393	Hypothetical protein	- none -
ND	fig|1703.41.peg.2664	BLSMQ_RS13860	0	BLSMQ	3021395	CDS	NZ_CP017150	3022372	3021395	-1	-	978	Hypothetical protein	- none -
ND	fig|1703.41.peg.2666	BLSMQ_RS13870	0	BLSMQ	3025973	CDS	NZ_CP017150	3025973	3026590	2	+	618	Hypothetical protein	- none -
ND	fig|1703.41.peg.2668	BLSMQ_RS13880	0	BLSMQ	3028025	CDS	NZ_CP017150	3028025	3028216	2	+	192	Hypothetical protein	- none -
ND	fig|1703.41.peg.2671	BLSMQ_RS13895	0	BLSMQ	3030008	CDS	NZ_CP017150	3031489	3030008	-1	-	1482	Hypothetical protein	- none -
ND	fig|1703.41.peg.2673	BLSMQ_RS13905	0	BLSMQ	3033340	CDS	NZ_CP017150	3035091	3033340	-3	-	1752	Hypothetical protein	- none -
ND	fig|1703.41.peg.2674	BLSMQ_RS13910	0	BLSMQ	3035088	CDS	NZ_CP017150	3036053	3035088	-2	-	966	Hypothetical protein	- none -
ND	fig|1703.41.peg.2675	BLSMQ_RS13915	0	BLSMQ	3036065	CDS	NZ_CP017150	3036532	3036065	-1	-	468	Hypothetical protein	- none -
ND	fig|1703.41.peg.2676	BLSMQ_RS13920	0	BLSMQ	3036561	CDS	NZ_CP017150	3037139	3036561	-2	-	579	Hypothetical protein	- none -
ND	fig|1703.41.peg.2677	BLSMQ_RS13925	0	BLSMQ	3037340	CDS	NZ_CP017150	3037696	3037340	-1	-	357	Hypothetical protein	- none -
ND	fig|1703.41.peg.2679	BLSMQ_RS13935	0	BLSMQ	3043413	CDS	NZ_CP017150	3043413	3044045	3	+	633	Hypothetical protein	- none -
ND	fig|1703.41.peg.2683	BLSMQ_RS13955	0	BLSMQ	3047514	CDS	NZ_CP017150	3047514	3047714	3	+	201	Hypothetical protein	- none -
ND	fig|1703.41.peg.2684	BLSMQ_RS13960	0	BLSMQ	3047721	CDS	NZ_CP017150	3047721	3048056	3	+	336	Hypothetical protein	- none -
ND	fig|1703.41.peg.2686	BLSMQ_RS13970	0	BLSMQ	3049542	CDS	NZ_CP017150	3049542	3050489	3	+	948	Hypothetical protein	- none -
ND	fig|1703.41.peg.2687	BLSMQ_RS13975	0	BLSMQ	3050529	CDS	NZ_CP017150	3050529	3051620	3	+	1092	Hypothetical protein	- none -
ND	fig|1703.41.peg.2688	BLSMQ_RS13980	0	BLSMQ	3051665	CDS	NZ_CP017150	3051665	3052702	2	+	1038	Hypothetical protein	- none -
ND	fig|1703.41.peg.2689	BLSMQ_RS13985	0	BLSMQ	3052753	CDS	NZ_CP017150	3052753	3053718	1	+	966	Hypothetical protein	- none -
ND	fig|1703.41.peg.2690	BLSMQ_RS14000	0	BLSMQ	3055416	CDS	NZ_CP017150	3055416	3056333	3	+	918	Hypothetical protein	- none -
ND	fig|1703.41.peg.2691	BLSMQ_RS14005	0	BLSMQ	3056690	CDS	NZ_CP017150	3056690	3057205	2	+	516	Hypothetical protein	- none -
ND	fig|1703.41.peg.2758	BLSMQ_RS14355	0	BLSMQ	3124348	CDS	NZ_CP017150	3124348	3124656	1	+	309	Hypothetical protein	- none -
ND	fig|1703.41.peg.2762	BLSMQ_RS14380	0	BLSMQ	3128472	CDS	NZ_CP017150	3128472	3128684	3	+	213	Hypothetical protein	- none -
ND	fig|1703.41.peg.2801	BLSMQ_RS14585	0	BLSMQ	3169316	CDS	NZ_CP017150	3169513	3169316	-1	-	198	Hypothetical protein	- none -
ND	fig|1703.41.peg.2802	BLSMQ_RS14590	0	BLSMQ	3169539	CDS	NZ_CP017150	3169539	3169964	3	+	426	Hypothetical protein	- none -
ND	fig|1703.41.peg.2815	BLSMQ_RS14660	0	BLSMQ	3184804	CDS	NZ_CP017150	3184804	3185262	1	+	459	Hypothetical protein	- none -
ND	fig|1703.41.peg.2955	BLSMQ_RS15370	0	BLSMQ	3351215	CDS	NZ_CP017150	3351889	3351215	-1	-	675	Hypothetical protein	- none -
ND	fig|1703.41.peg.2961	BLSMQ_RS15395	0	BLSMQ	3354974	CDS	NZ_CP017150	3354974	3355987	2	+	1014	Hypothetical protein	- none -
ND	fig|1703.41.peg.2967	BLSMQ_RS15425	0	BLSMQ	3361149	CDS	NZ_CP017150	3361580	3361149	-2	-	432	Hypothetical protein	- none -
ND	fig|1703.41.peg.3230	BLSMQ_RS16770	0	BLSMQ	3642514	CDS	NZ_CP017150	3642867	3642514	-3	-	354	Hypothetical protein	- none -
ND	fig|1703.46.peg.1548	CIK79_RS08090	9	CIK79	65101	CDS	NZ_NRGX01000001	1824316	1824546	1	+	231	Hypothetical protein	- none -
ND	fig|1703.46.peg.1552	CIK79_RS08115	9	CIK79	69748	CDS	NZ_NRGX01000001	1829343	1828963	-3	-	381	Hypothetical protein	- none -
ND	fig|1703.46.peg.1553	CIK79_RS08120	9	CIK79	70612	CDS	NZ_NRGX01000001	1829827	1830450	1	+	624	Hypothetical protein	- none -
ND	fig|1703.46.peg.1554	CIK79_RS08125	9	CIK79	71269	CDS	NZ_NRGX01000001	1830484	1830873	1	+	390	Hypothetical protein	- none -
ND	fig|1703.46.peg.1555	CIK79_RS08130	9	CIK79	71651	CDS	NZ_NRGX01000001	1830866	1831330	2	+	465	Hypothetical protein	- none -
ND	fig|1703.46.peg.1556	CIK79_RS08135	9	CIK79	72138	CDS	NZ_NRGX01000001	1831353	1831772	3	+	420	Hypothetical protein	- none -
ND	fig|1703.46.peg.1628	CIK79_RS08510	9	CIK79	152445	CDS	NZ_NRGX01000001	1911902	1911660	-2	-	243	Hypothetical protein	- none -
ND	fig|1703.46.peg.1629	CIK79_RS08515	9	CIK79	152677	CDS	NZ_NRGX01000001	1912551	1911892	-3	-	660	Hypothetical protein	- none -
ND	fig|1703.46.peg.1630	CIK79_RS08520	9	CIK79	153448	CDS	NZ_NRGX01000001	1913154	1912663	-3	-	492	Hypothetical protein	- none -
ND	fig|1703.46.peg.1632	CIK79_RS08530	9	CIK79	155848	CDS	NZ_NRGX01000001	1915599	1915063	-3	-	537	Hypothetical protein	- none -
ND	fig|1703.46.peg.1633	CIK79_RS08535	9	CIK79	156449	CDS	NZ_NRGX01000001	1916128	1915664	-1	-	465	Hypothetical protein	- none -
ND	fig|1703.46.peg.1640	CIK79_RS08570	9	CIK79	163756	CDS	NZ_NRGX01000001	1922971	1923303	1	+	333	Hypothetical protein	- none -
ND	fig|1703.46.peg.1641	CIK79_RS08575	9	CIK79	164152	CDS	NZ_NRGX01000001	1923663	1923367	-3	-	297	Hypothetical protein	- none -
ND	fig|1703.46.peg.1643	CIK79_RS08585	9	CIK79	165711	CDS	NZ_NRGX01000001	1925606	1924926	-2	-	681	Hypothetical protein	- none -
ND	fig|1703.46.peg.1644	CIK79_RS08590	9	CIK79	166501	CDS	NZ_NRGX01000001	1926195	1925716	-3	-	480	Hypothetical protein	- none -
ND	fig|1703.46.peg.1646	CIK79_RS08600	9	CIK79	168052	CDS	NZ_NRGX01000001	1928109	1927267	-3	-	843	Hypothetical protein	- none -
ND	fig|1703.46.peg.1647	CIK79_RS08605	9	CIK79	169177	CDS	NZ_NRGX01000001	1928811	1928392	-3	-	420	Hypothetical protein	- none -
ND	fig|1703.46.peg.1648	CIK79_RS08610	9	CIK79	169589	CDS	NZ_NRGX01000001	1929049	1928804	-1	-	246	Hypothetical protein	- none -
ND	fig|1703.46.peg.1651	CIK79_RS08625	9	CIK79	171306	CDS	NZ_NRGX01000001	1930700	1930521	-2	-	180	Hypothetical protein	- none -
ND	fig|1703.46.peg.1686	CIK79_RS08805	9	CIK79	206890	CDS	NZ_NRGX01000001	1967376	1966105	-3	-	1272	Hypothetical protein	- none -
ND	fig|1703.46.peg.1687	CIK79_RS08825	9	CIK79	209739	CDS	NZ_NRGX01000001	1969448	1968954	-2	-	495	Hypothetical protein	- none -
ND	fig|1703.46.peg.1695	CIK79_RS08865	9	CIK79	218335	CDS	NZ_NRGX01000001	1978233	1977550	-3	-	684	Hypothetical protein	- none -
ND	fig|1703.46.peg.1697	CIK79_RS08875	9	CIK79	220134	CDS	NZ_NRGX01000001	1979645	1979349	-2	-	297	Hypothetical protein	- none -
ND	fig|1703.46.peg.1753	CIK79_RS09155	9	CIK79	277677	CDS	NZ_NRGX01000001	2036892	2037254	3	+	363	Hypothetical protein	- none -
ND	fig|1703.46.peg.1900	CIK79_RS09910	9	CIK79	451877	CDS	NZ_NRGX01000001	2211514	2211092	-1	-	423	Hypothetical protein	- none -
ND	fig|1703.46.peg.1950	CIK79_RS10160	9	CIK79	507465	CDS	NZ_NRGX01000001	2267423	2266680	-2	-	744	Hypothetical protein	- none -
ND	fig|1703.46.peg.2243	CIK79_RS11705	9	CIK79	855716	CDS	NZ_NRGX01000001	2614931	2615263	2	+	333	Hypothetical protein	- none -
ND	fig|1703.46.peg.2890	CIK79_RS15100	9	CIK79	1573574	CDS	NZ_NRGX01000001	3333019	3332789	-1	-	231	Hypothetical protein	- none -
ND	fig|1703.46.peg.2892	CIK79_RS15110	9	CIK79	1575501	CDS	NZ_NRGX01000001	3335399	3334716	-2	-	684	Hypothetical protein	- none -
ND	fig|1703.46.peg.3102	CIK79_RS16180	9	CIK79	1799278	CDS	NZ_NRGX01000001	3558493	3558867	1	+	375	Hypothetical protein	- none -
ND	fig|1703.46.peg.3119	CIK79_RS16270	9	CIK79	1816789	CDS	NZ_NRGX01000001	3576387	3576004	-3	-	384	Hypothetical protein	- none -
ND	fig|1703.46.peg.3311	CIK79_RS17270	9	CIK79	2039413	CDS	NZ_NRGX01000001	3798628	3798879	1	+	252	Hypothetical protein	- none -
ND	fig|1703.46.peg.19	CIK79_RS00095	9	CIK79	2585522	CDS	NZ_NRGX01000001	34123	34218	1	+	96	Hypothetical protein	- none -
ND	fig|1703.46.peg.22	CIK79_RS00110	9	CIK79	2588223	CDS	NZ_NRGX01000001	37222	36824	-1	-	399	Hypothetical protein	- none -
ND	fig|1703.46.peg.24	CIK79_RS00120	9	CIK79	2589226	CDS	NZ_NRGX01000001	38399	37827	-2	-	573	Hypothetical protein	- none -
ND	fig|1703.46.peg.26	CIK79_RS00130	9	CIK79	2590629	CDS	NZ_NRGX01000001	39230	39592	2	+	363	Hypothetical protein	- none -
ND	fig|1703.46.peg.27	CIK79_RS00135	9	CIK79	2591150	CDS	NZ_NRGX01000001	39751	40539	1	+	789	Hypothetical protein	- none -
ND	fig|1703.46.peg.29	CIK79_RS00145	9	CIK79	2593156	CDS	NZ_NRGX01000001	41757	42125	3	+	369	Hypothetical protein	- none -
ND	fig|1703.46.peg.34	CIK79_RS00170	9	CIK79	2598934	CDS	NZ_NRGX01000001	48077	47535	-2	-	543	Hypothetical protein	- none -
ND	fig|1703.46.peg.35	CIK79_RS00175	9	CIK79	2599800	CDS	NZ_NRGX01000001	48401	48898	2	+	498	Hypothetical protein	- none -
ND	fig|1703.46.peg.36	CIK79_RS00180	9	CIK79	2600334	CDS	NZ_NRGX01000001	49216	48935	-1	-	282	Hypothetical protein	- none -
ND	fig|1703.46.peg.38	CIK79_RS00190	9	CIK79	2601866	CDS	NZ_NRGX01000001	51156	50467	-3	-	690	Hypothetical protein	- none -
ND	fig|1703.46.peg.39	CIK79_RS00195	9	CIK79	2602641	CDS	NZ_NRGX01000001	51985	51242	-1	-	744	Hypothetical protein	- none -
ND	fig|1703.46.peg.40	CIK79_RS00200	9	CIK79	2603514	CDS	NZ_NRGX01000001	52534	52115	-1	-	420	Hypothetical protein	- none -
ND	fig|1703.46.peg.42	CIK79_RS00210	9	CIK79	2605170	CDS	NZ_NRGX01000001	54601	53771	-1	-	831	Hypothetical protein	- none -
ND	fig|1703.46.peg.43	CIK79_RS00215	9	CIK79	2606193	CDS	NZ_NRGX01000001	55207	54794	-1	-	414	Hypothetical protein	- none -
ND	fig|1703.46.peg.47	CIK79_RS00235	9	CIK79	2611093	CDS	NZ_NRGX01000001	59694	59951	3	+	258	Hypothetical protein	- none -
ND	fig|1703.46.peg.48	CIK79_RS00240	9	CIK79	2611365	CDS	NZ_NRGX01000001	59966	60388	2	+	423	Hypothetical protein	- none -
ND	fig|1703.46.peg.52	CIK79_RS00260	9	CIK79	2615944	CDS	NZ_NRGX01000001	65558	64545	-2	-	1014	Hypothetical protein	- none -
ND	fig|1703.46.peg.53	CIK79_RS00265	9	CIK79	2617111	CDS	NZ_NRGX01000001	67145	65712	-2	-	1434	Hypothetical protein	- none -
ND	fig|1703.46.peg.54	CIK79_RS00270	9	CIK79	2618634	CDS	NZ_NRGX01000001	67678	67235	-1	-	444	Hypothetical protein	- none -
ND	fig|1703.46.peg.56	CIK79_RS00280	9	CIK79	2621008	CDS	NZ_NRGX01000001	69609	70109	3	+	501	Hypothetical protein	- none -
ND	fig|1703.46.peg.59	CIK79_RS00295	9	CIK79	2624757	CDS	NZ_NRGX01000001	73933	73358	-1	-	576	Hypothetical protein	- none -
ND	fig|1703.46.peg.62	CIK79_RS00310	9	CIK79	2627195	CDS	NZ_NRGX01000001	75796	76284	1	+	489	Hypothetical protein	- none -
ND	fig|1703.46.peg.64	CIK79_RS00320	9	CIK79	2631833	CDS	NZ_NRGX01000001	80434	80754	1	+	321	Hypothetical protein	- none -
ND	fig|1703.46.peg.65	CIK79_RS00330	9	CIK79	2633206	CDS	NZ_NRGX01000001	82580	81807	-2	-	774	Hypothetical protein	- none -
ND	fig|1703.46.peg.67	CIK79_RS00340	9	CIK79	2634998	CDS	NZ_NRGX01000001	83994	83599	-3	-	396	Hypothetical protein	- none -
ND	fig|1703.46.peg.152	CIK79_RS00810	9	CIK79	2750035	CDS	NZ_NRGX01000001	198827	198636	-2	-	192	Hypothetical protein	- none -
ND	fig|1703.46.peg.153	CIK79_RS00815	9	CIK79	2750661	CDS	NZ_NRGX01000001	199510	199262	-1	-	249	Hypothetical protein	- none -
ND	fig|1703.46.peg.157	CIK79_RS00835	9	CIK79	2754005	CDS	NZ_NRGX01000001	202606	202848	1	+	243	Hypothetical protein	- none -
ND	fig|1703.46.peg.160	CIK79_RS00850	9	CIK79	2756986	CDS	NZ_NRGX01000001	207920	205587	-2	-	2334	Hypothetical protein	- none -
ND	fig|1703.46.peg.163	CIK79_RS00865	9	CIK79	2765983	CDS	NZ_NRGX01000001	215141	214584	-2	-	558	Hypothetical protein	- none -
ND	fig|1703.46.peg.164	CIK79_RS00870	9	CIK79	2766537	CDS	NZ_NRGX01000001	215863	215138	-1	-	726	Hypothetical protein	- none -
ND	fig|1703.46.peg.381	CIK79_RS02010	9	CIK79	3011280	CDS	NZ_NRGX01000001	459881	460069	2	+	189	Hypothetical protein	- none -
ND	fig|1703.46.peg.385	CIK79_RS02040	9	CIK79	3015279	CDS	NZ_NRGX01000001	463880	464068	2	+	189	Hypothetical protein	- none -
ND	fig|1703.46.peg.389	CIK79_RS02060	9	CIK79	3019215	CDS	NZ_NRGX01000001	467816	468046	2	+	231	Hypothetical protein	- none -
ND	fig|1703.46.peg.671	CIK79_RS03510	9	CIK79	3349404	CDS	NZ_NRGX01000001	798005	798967	2	+	963	Hypothetical protein	- none -
ND	fig|1703.46.peg.676	CIK79_RS03535	9	CIK79	3353915	CDS	NZ_NRGX01000001	802516	802809	1	+	294	Hypothetical protein	- none -
ND	fig|1703.46.peg.960	CIK79_RS05015	9	CIK79	3673327	CDS	NZ_NRGX01000001	1121928	1122137	3	+	210	Hypothetical protein	- none -
ND	fig|1703.46.peg.1100	CIK79_RS05745	9	CIK79	3838280	CDS	NZ_NRGX01000001	1287369	1286881	-3	-	489	Hypothetical protein	- none -
ND	fig|1703.46.peg.1101	CIK79_RS05750	9	CIK79	3838772	CDS	NZ_NRGX01000001	1287660	1287373	-3	-	288	Hypothetical protein	- none -
ND	fig|1703.46.peg.1197	CIK79_RS06255	9	CIK79	3957027	CDS	NZ_NRGX01000001	1405628	1405867	2	+	240	Hypothetical protein	- none -
ND	fig|1703.46.peg.1213	CIK79_RS06340	9	CIK79	3979582	CDS	NZ_NRGX01000001	1429634	1428183	-2	-	1452	Hypothetical protein	- none -
ND	fig|1703.46.peg.1216	CIK79_RS06355	9	CIK79	3983894	CDS	NZ_NRGX01000001	1433856	1432495	-3	-	1362	Hypothetical protein	- none -
ND	fig|273384.26.peg.218	CXR23_01170	10	CXR23	246429	CDS	CP025330	246429	246677	3	+	249	Hypothetical protein	- none -
ND	fig|273384.26.peg.282	CXR23_01495	10	CXR23	313662	CDS	CP025330	313662	315152	3	+	1491	Hypothetical protein	- none -
ND	fig|273384.26.peg.283	CXR23_01500	10	CXR23	315409	CDS	CP025330	315409	315597	1	+	189	Hypothetical protein	- none -
ND	fig|273384.26.peg.285	CXR23_01510	10	CXR23	317306	CDS	CP025330	317306	317584	2	+	279	Hypothetical protein	- none -
ND	fig|273384.26.peg.292	CXR23_01565	10	CXR23	325913	CDS	CP025330	325913	327022	2	+	1110	Hypothetical protein	- none -
ND	fig|273384.26.peg.386	CXR23_02050	10	CXR23	442492	CDS	CP025330	443727	442492	-3	-	1236	Hypothetical protein	- none -
ND	fig|273384.26.peg.390	CXR23_02070	10	CXR23	447116	CDS	CP025330	447116	447508	2	+	393	Hypothetical protein	- none -
ND	fig|273384.26.peg.391	CXR23_02075	10	CXR23	447505	CDS	CP025330	447505	448350	1	+	846	Hypothetical protein	- none -
ND	fig|273384.26.peg.424	CXR23_02255	10	CXR23	487954	CDS	CP025330	488286	487954	-3	-	333	Hypothetical protein	- none -
ND	fig|273384.26.peg.480	CXR23_02540	10	CXR23	559558	CDS	CP025330	560121	559558	-3	-	564	Hypothetical protein	- none -
ND	fig|273384.26.peg.535	CXR23_02830	10	CXR23	630411	CDS	CP025330	631694	630411	-2	-	1284	Hypothetical protein	- none -
ND	fig|273384.26.peg.536	CXR23_02835	10	CXR23	631760	CDS	CP025330	632494	631760	-1	-	735	Hypothetical protein	- none -
ND	fig|273384.26.peg.545	CXR23_02880	10	CXR23	643049	CDS	CP025330	644944	643049	-1	-	1896	Hypothetical protein	- none -
ND	fig|273384.26.peg.903	CXR23_04805	10	CXR23	1055306	CDS	CP025330	1055770	1055306	-1	-	465	Hypothetical protein	- none -
ND	fig|273384.26.peg.925	CXR23_04920	10	CXR23	1080475	CDS	CP025330	1081029	1080475	-3	-	555	Hypothetical protein	- none -
ND	fig|273384.26.peg.954	CXR23_05065	10	CXR23	1116665	CDS	CP025330	1117435	1116665	-1	-	771	Hypothetical protein	- none -
ND	fig|273384.26.peg.980	CXR23_05200	10	CXR23	1145296	CDS	CP025330	1145296	1145520	1	+	225	Hypothetical protein	- none -
ND	fig|273384.26.peg.1126	CXR23_06005	10	CXR23	1291397	CDS	CP025330	1291921	1291397	-1	-	525	Hypothetical protein	- none -
ND	fig|273384.26.peg.1135	CXR23_06060	10	CXR23	1300960	CDS	CP025330	1300960	1301199	1	+	240	Hypothetical protein	- none -
ND	fig|273384.26.peg.1318	CXR23_07035	10	CXR23	1496650	CDS	CP025330	1497075	1496650	-3	-	426	Hypothetical protein	- none -
ND	fig|273384.26.peg.1319	CXR23_07040	10	CXR23	1497644	CDS	CP025330	1497644	1498144	2	+	501	Hypothetical protein	- none -
ND	fig|273384.26.peg.1320	CXR23_07045	10	CXR23	1498163	CDS	CP025330	1498393	1498163	-1	-	231	Hypothetical protein	- none -
ND	fig|273384.26.peg.1321	CXR23_07050	10	CXR23	1498606	CDS	CP025330	1499376	1498606	-3	-	771	Hypothetical protein	- none -
ND	fig|273384.26.peg.1322	CXR23_07055	10	CXR23	1499632	CDS	CP025330	1499632	1500156	1	+	525	Hypothetical protein	- none -
ND	fig|273384.26.peg.1335	CXR23_07130	10	CXR23	1518076	CDS	CP025330	1518450	1518076	-3	-	375	Hypothetical protein	- none -
ND	fig|273384.26.peg.1336	CXR23_07135	10	CXR23	1518875	CDS	CP025330	1519414	1518875	-1	-	540	Hypothetical protein	- none -
ND	fig|273384.26.peg.1341	CXR23_07160	10	CXR23	1525152	CDS	CP025330	1525152	1526210	3	+	1059	Hypothetical protein	- none -
ND	fig|273384.26.peg.1344	CXR23_07175	10	CXR23	1528801	CDS	CP025330	1528801	1530042	1	+	1242	Hypothetical protein	- none -
ND	fig|273384.26.peg.1347	CXR23_07190	10	CXR23	1533400	CDS	CP025330	1533400	1534737	1	+	1338	Hypothetical protein	- none -
ND	fig|273384.26.peg.1348	CXR23_07200	10	CXR23	1535143	CDS	CP025330	1535337	1535143	-3	-	195	Hypothetical protein	- none -
ND	fig|273384.26.peg.1349	CXR23_07205	10	CXR23	1535511	CDS	CP025330	1535783	1535511	-2	-	273	Hypothetical protein	- none -
ND	fig|273384.26.peg.1415	CXR23_07540	10	CXR23	1613971	CDS	CP025330	1614732	1613971	-3	-	762	Hypothetical protein	- none -
ND	fig|273384.26.peg.1428	CXR23_07605	10	CXR23	1625388	CDS	CP025330	1625618	1625388	-2	-	231	Hypothetical protein	- none -
ND	fig|273384.26.peg.1466	CXR23_07815	10	CXR23	1669450	CDS	CP025330	1670181	1669450	-3	-	732	Hypothetical protein	- none -
ND	fig|273384.26.peg.1468	CXR23_07825	10	CXR23	1671223	CDS	CP025330	1671223	1672290	1	+	1068	Hypothetical protein	- none -
ND	fig|273384.26.peg.1472	CXR23_07845	10	CXR23	1675564	CDS	CP025330	1675785	1675564	-3	-	222	Hypothetical protein	- none -
ND	fig|273384.26.peg.1678	CXR23_08930	10	CXR23	1902942	CDS	CP025330	1903325	1902942	-2	-	384	Hypothetical protein	- none -
ND	fig|273384.26.peg.2417	CXR23_12860	10	CXR23	2762658	CDS	CP025330	2762658	2765744	3	+	3087	Hypothetical protein	- none -
ND	fig|273384.26.peg.2429	CXR23_12935	10	CXR23	2785738	CDS	CP025330	2785738	2787576	1	+	1839	Hypothetical protein	- none -
ND	fig|273384.26.peg.2644	CXR23_14060	10	CXR23	3029661	CDS	CP025330	3029661	3030329	3	+	669	Hypothetical protein	- none -
ND	fig|273384.26.peg.2647	CXR23_14075	10	CXR23	3032056	CDS	CP025330	3032056	3032571	1	+	516	Hypothetical protein	- none -
ND	fig|273384.26.peg.2649	CXR23_14085	10	CXR23	3033217	CDS	CP025330	3034188	3033217	-3	-	972	Hypothetical protein	- none -
ND	fig|273384.26.peg.2769	CXR23_14720	10	CXR23	3171888	CDS	CP025330	3174455	3171888	-2	-	2568	Hypothetical protein	- none -
ND	fig|273384.26.peg.2770	CXR23_14725	10	CXR23	3174452	CDS	CP025330	3176392	3174452	-1	-	1941	Hypothetical protein	- none -
ND	fig|273384.26.peg.2771	CXR23_14730	10	CXR23	3177418	CDS	CP025330	3178032	3177418	-3	-	615	Hypothetical protein	- none -
ND	fig|273384.26.peg.2772	CXR23_14735	10	CXR23	3178402	CDS	CP025330	3178402	3178707	1	+	306	Hypothetical protein	- none -
ND	fig|273384.26.peg.2780	CXR23_14775	10	CXR23	3189578	CDS	CP025330	3190492	3189578	-1	-	915	Hypothetical protein	- none -
ND	fig|273384.26.peg.2782	CXR23_14785	10	CXR23	3193265	CDS	CP025330	3193265	3193399	2	+	135	Hypothetical protein	- none -
ND	fig|273384.26.peg.2784	CXR23_14795	10	CXR23	3196993	CDS	CP025330	3197289	3196993	-3	-	297	Hypothetical protein	- none -
ND	fig|273384.26.peg.2786	CXR23_14805	10	CXR23	3201184	CDS	CP025330	3201819	3201184	-3	-	636	Hypothetical protein	- none -
ND	fig|273384.26.peg.2796	CXR23_14865	10	CXR23	3213123	CDS	CP025330	3213123	3213653	3	+	531	Hypothetical protein	- none -
ND	fig|273384.26.peg.2801	CXR23_14890	10	CXR23	3218642	CDS	CP025330	3219349	3218642	-1	-	708	Hypothetical protein	- none -
ND	fig|273384.26.peg.2810	CXR23_14935	10	CXR23	3229051	CDS	CP025330	3229051	3229557	1	+	507	Hypothetical protein	- none -
ND	fig|273384.26.peg.2813	CXR23_14950	10	CXR23	3231570	CDS	CP025330	3231570	3232304	3	+	735	Hypothetical protein	- none -
ND	fig|273384.26.peg.2818	CXR23_14980	10	CXR23	3237788	CDS	CP025330	3238246	3237788	-1	-	459	Hypothetical protein	- none -
ND	fig|273384.26.peg.2823	CXR23_15005	10	CXR23	3242251	CDS	CP025330	3242251	3243105	1	+	855	Hypothetical protein	- none -
ND	fig|273384.26.peg.2829	CXR23_15035	10	CXR23	3248658	CDS	CP025330	3248903	3248658	-2	-	246	Hypothetical protein	- none -
ND	fig|273384.26.peg.2832	CXR23_15050	10	CXR23	3250999	CDS	CP025330	3250999	3251532	1	+	534	Hypothetical protein	- none -
ND	fig|273384.26.peg.2840	CXR23_15090	10	CXR23	3261373	CDS	CP025330	3261585	3261373	-3	-	213	Hypothetical protein	- none -
ND	fig|273384.26.peg.2841	CXR23_15100	10	CXR23	3262420	CDS	CP025330	3262420	3262770	1	+	351	Hypothetical protein	- none -
ND	fig|273384.26.peg.2842	CXR23_15105	10	CXR23	3262827	CDS	CP025330	3263033	3262827	-2	-	207	Hypothetical protein	- none -
ND	fig|273384.26.peg.3052	CXR23_16200	10	CXR23	3517808	CDS	CP025330	3517808	3518770	2	+	963	Hypothetical protein	- none -
ND	fig|273384.26.peg.3316	CXR23_17565	10	CXR23	3811237	CDS	CP025330	3811488	3811237	-3	-	252	Hypothetical protein	- none -
ND	fig|273384.26.peg.3326	CXR23_17620	10	CXR23	3820930	CDS	CP025330	3821415	3820930	-3	-	486	Hypothetical protein	- none -
ND	fig|273384.26.peg.3327	CXR23_17625	10	CXR23	3821549	CDS	CP025330	3822517	3821549	-1	-	969	Hypothetical protein	- none -
ND	fig|273384.26.peg.3336	CXR23_17670	10	CXR23	3830716	CDS	CP025330	3831108	3830716	-3	-	393	Hypothetical protein	- none -
ND	fig|273384.26.peg.3343	CXR23_17705	10	CXR23	3838035	CDS	CP025330	3838304	3838035	-2	-	270	Hypothetical protein	- none -
ND	fig|273384.26.peg.3351	CXR23_17745	10	CXR23	3847057	CDS	CP025330	3847057	3847512	1	+	456	Hypothetical protein	- none -
ND	fig|273384.26.peg.3356	CXR23_17775	10	CXR23	3851960	CDS	CP025330	3852322	3851960	-1	-	363	Hypothetical protein	- none -
ND	fig|273384.26.peg.3364	CXR23_17815	10	CXR23	3858710	CDS	CP025330	3858710	3859231	2	+	522	Hypothetical protein	- none -
ND	fig|273384.26.peg.3368	CXR23_17835	10	CXR23	3862552	CDS	CP025330	3863172	3862552	-3	-	621	Hypothetical protein	- none -
ND	fig|273384.26.peg.3374	CXR23_17870	10	CXR23	3871235	CDS	CP025330	3871235	3871444	2	+	210	Hypothetical protein	- none -
ND	fig|273384.26.peg.3375	CXR23_17875	10	CXR23	3871574	CDS	CP025330	3871574	3871882	2	+	309	Hypothetical protein	- none -
ND	fig|273384.26.peg.3376	CXR23_17880	10	CXR23	3872030	CDS	CP025330	3872030	3872719	2	+	690	Hypothetical protein	- none -
ND	fig|273384.26.peg.3379	CXR23_17895	10	CXR23	3876905	CDS	CP025330	3877231	3876905	-1	-	327	Hypothetical protein	- none -
ND	fig|273384.26.peg.3480	CXR23_18450	10	CXR23	4008261	CDS	CP025330	4008261	4008593	3	+	333	Hypothetical protein	- none -
ND	fig|273384.26.peg.3549	CXR23_18800	10	CXR23	4092723	CDS	CP025330	4092723	4093169	3	+	447	Hypothetical protein	- none -
ND	fig|273384.22.peg.355	CXR24_01870	3	CXR24	406916	CDS	CP025331	406916	407125	2	+	210	Hypothetical protein	- none -
ND	fig|273384.22.peg.416	CXR24_02180	3	CXR24	478044	CDS	CP025331	478823	478044	-2	-	780	Hypothetical protein	- none -
ND	fig|273384.22.peg.472	CXR24_02470	3	CXR24	545933	CDS	CP025331	548344	545933	-1	-	2412	Hypothetical protein	- none -
ND	fig|273384.22.peg.473	CXR24_02475	3	CXR24	548619	CDS	CP025331	548619	553166	3	+	4548	Hypothetical protein	- none -
ND	fig|273384.22.peg.497	CXR24_02610	3	CXR24	588522	CDS	CP025331	589517	588522	-2	-	996	Hypothetical protein	- none -
ND	fig|273384.22.peg.499	CXR24_02620	3	CXR24	591089	CDS	CP025331	591592	591089	-1	-	504	Hypothetical protein	- none -
ND	fig|273384.22.peg.503	CXR24_02645	3	CXR24	599276	CDS	CP025331	599518	599276	-1	-	243	Hypothetical protein	- none -
ND	fig|273384.22.peg.507	CXR24_02665	3	CXR24	604005	CDS	CP025331	604005	604532	3	+	528	Hypothetical protein	- none -
ND	fig|273384.22.peg.508	CXR24_02670	3	CXR24	604529	CDS	CP025331	604529	605173	2	+	645	Hypothetical protein	- none -
ND	fig|273384.22.peg.509	CXR24_02675	3	CXR24	605245	CDS	CP025331	605245	605454	1	+	210	Hypothetical protein	- none -
ND	fig|273384.22.peg.515	CXR24_02705	3	CXR24	612542	CDS	CP025331	612542	613240	2	+	699	Hypothetical protein	- none -
ND	fig|273384.22.peg.809	CXR24_04240	3	CXR24	951042	CDS	CP025331	951042	951200	3	+	159	Hypothetical protein	- none -
ND	fig|273384.22.peg.1489	CXR24_07810	3	CXR24	1705824	CDS	CP025331	1706039	1705824	-2	-	216	Hypothetical protein	- none -
ND	fig|273384.22.peg.1569	CXR24_08235	3	CXR24	1780066	CDS	CP025331	1780500	1780066	-3	-	435	Hypothetical protein	- none -
ND	fig|273384.22.peg.1710	CXR24_08970	3	CXR24	1934239	CDS	CP025331	1934523	1934239	-3	-	285	Hypothetical protein	- none -
ND	fig|273384.22.peg.2274	CXR24_11950	3	CXR24	2591887	CDS	CP025331	2592573	2591887	-3	-	687	Hypothetical protein	- none -
ND	fig|273384.22.peg.2293	CXR24_12055	3	CXR24	2626579	CDS	CP025331	2626758	2626579	-3	-	180	Hypothetical protein	- none -
ND	fig|273384.22.peg.2294	CXR24_12060	3	CXR24	2626872	CDS	CP025331	2626872	2627060	3	+	189	Hypothetical protein	- none -
ND	fig|273384.22.peg.2812	CXR24_14745	3	CXR24	3218825	CDS	CP025331	3219103	3218825	-1	-	279	Hypothetical protein	- none -
ND	fig|273384.22.peg.2814	CXR24_14755	3	CXR24	3219747	CDS	CP025331	3219977	3219747	-2	-	231	Hypothetical protein	- none -
ND	fig|273384.22.peg.3194	CXR24_16735	3	CXR24	3651946	CDS	CP025331	3651946	3653295	1	+	1350	Hypothetical protein	- none -
ND	fig|273384.22.peg.3274	CXR24_17140	3	CXR24	3750744	CDS	CP025331	3750744	3751262	3	+	519	Hypothetical protein	- none -
ND	fig|273384.22.peg.3312	CXR24_17360	3	CXR24	3799369	CDS	CP025331	3800463	3799369	-3	-	1095	Hypothetical protein	- none -
ND	fig|273384.22.peg.3533	CXR24_18490	3	CXR24	4057060	CDS	CP025331	4057060	4058775	1	+	1716	Hypothetical protein	- none -
ND	fig|273384.20.peg.215	CXR25_01135	7	CXR25	235925	CDS	CP025333	236239	235925	-1	-	315	Hypothetical protein	- none -
ND	fig|273384.20.peg.216	CXR25_01140	7	CXR25	236289	CDS	CP025333	236501	236289	-2	-	213	Hypothetical protein	- none -
ND	fig|273384.20.peg.219	CXR25_01155	7	CXR25	239491	CDS	CP025333	239491	239985	1	+	495	Hypothetical protein	- none -
ND	fig|273384.20.peg.306	CXR25_01620	7	CXR25	342035	CDS	CP025333	342292	342035	-1	-	258	Hypothetical protein	- none -
ND	fig|273384.20.peg.467	CXR25_02430	7	CXR25	531369	CDS	CP025333	531369	532247	3	+	879	Hypothetical protein	- none -
ND	fig|273384.20.peg.468	CXR25_02435	7	CXR25	532702	CDS	CP025333	532702	534609	1	+	1908	Hypothetical protein	- none -
ND	fig|273384.20.peg.470	CXR25_02445	7	CXR25	537448	CDS	CP025333	537448	539502	1	+	2055	Hypothetical protein	- none -
ND	fig|273384.20.peg.473	CXR25_02465	7	CXR25	543841	CDS	CP025333	545238	543841	-3	-	1398	Hypothetical protein	- none -
ND	fig|273384.20.peg.683	CXR25_03590	7	CXR25	782046	CDS	CP025333	782369	782046	-2	-	324	Hypothetical protein	- none -
ND	fig|273384.20.peg.690	CXR25_03625	7	CXR25	789123	CDS	CP025333	789770	789123	-2	-	648	Hypothetical protein	- none -
ND	fig|273384.20.peg.1059	CXR25_05580	7	CXR25	1199118	CDS	CP025333	1199118	1199297	3	+	180	Hypothetical protein	- none -
ND	fig|273384.20.peg.1065	CXR25_05615	7	CXR25	1207007	CDS	CP025333	1207007	1207117	2	+	111	Hypothetical protein	- none -
ND	fig|273384.20.peg.1759	CXR25_09205	7	CXR25	1971383	CDS	CP025333	1971940	1971383	-1	-	558	Hypothetical protein	- none -
ND	fig|273384.20.peg.1760	CXR25_09210	7	CXR25	1972210	CDS	CP025333	1973157	1972210	-3	-	948	Hypothetical protein	- none -
ND	fig|273384.20.peg.2238	CXR25_11725	7	CXR25	2526249	CDS	CP025333	2526249	2526545	3	+	297	Hypothetical protein	- none -
ND	fig|273384.20.peg.2246	CXR25_11765	7	CXR25	2542429	CDS	CP025333	2543049	2542429	-3	-	621	Hypothetical protein	- none -
ND	fig|273384.20.peg.2254	CXR25_11815	7	CXR25	2553762	CDS	CP025333	2553762	2553992	3	+	231	Hypothetical protein	- none -
ND	fig|273384.20.peg.2612	CXR25_13680	7	CXR25	2954853	CDS	CP025333	2955548	2954853	-2	-	696	Hypothetical protein	- none -
ND	fig|273384.20.peg.2613	CXR25_13685	7	CXR25	2955653	CDS	CP025333	2955653	2955859	2	+	207	Hypothetical protein	- none -
ND	fig|273384.20.peg.2614	CXR25_13690	7	CXR25	2955852	CDS	CP025333	2955852	2956079	3	+	228	Hypothetical protein	- none -
ND	fig|273384.20.peg.2615	CXR25_13695	7	CXR25	2956268	CDS	CP025333	2956268	2956744	2	+	477	Hypothetical protein	- none -
ND	fig|273384.20.peg.2616	CXR25_13700	7	CXR25	2956741	CDS	CP025333	2956741	2957133	1	+	393	Hypothetical protein	- none -
ND	fig|273384.20.peg.2617	CXR25_13705	7	CXR25	2957309	CDS	CP025333	2957309	2957542	2	+	234	Hypothetical protein	- none -
ND	fig|273384.20.peg.2618	CXR25_13710	7	CXR25	2957544	CDS	CP025333	2957544	2957876	3	+	333	Hypothetical protein	- none -
ND	fig|273384.20.peg.2619	CXR25_13715	7	CXR25	2957869	CDS	CP025333	2957869	2958225	1	+	357	Hypothetical protein	- none -
ND	fig|273384.20.peg.2621	CXR25_13725	7	CXR25	2960129	CDS	CP025333	2960129	2960446	2	+	318	Hypothetical protein	- none -
ND	fig|273384.20.peg.2622	CXR25_13730	7	CXR25	2960863	CDS	CP025333	2960863	2961330	1	+	468	Hypothetical protein	- none -
ND	fig|273384.20.peg.2624	CXR25_13740	7	CXR25	2961834	CDS	CP025333	2961834	2962145	3	+	312	Hypothetical protein	- none -
ND	fig|273384.20.peg.2625	CXR25_13745	7	CXR25	2962168	CDS	CP025333	2962168	2962407	1	+	240	Hypothetical protein	- none -
ND	fig|273384.20.peg.2626	CXR25_13750	7	CXR25	2962434	CDS	CP025333	2962434	2963171	3	+	738	Hypothetical protein	- none -
ND	fig|273384.20.peg.2628	CXR25_13760	7	CXR25	2965820	CDS	CP025333	2966365	2965820	-1	-	546	Hypothetical protein	- none -
ND	fig|273384.20.peg.2631	CXR25_13780	7	CXR25	2969606	CDS	CP025333	2969606	2970448	2	+	843	Hypothetical protein	- none -
ND	fig|273384.20.peg.2633	CXR25_13790	7	CXR25	2971021	CDS	CP025333	2971296	2971021	-3	-	276	Hypothetical protein	- none -
ND	fig|273384.20.peg.2634	CXR25_13795	7	CXR25	2971305	CDS	CP025333	2971305	2971841	3	+	537	Hypothetical protein	- none -
ND	fig|273384.20.peg.2635	CXR25_13800	7	CXR25	2972249	CDS	CP025333	2972443	2972249	-1	-	195	Hypothetical protein	- none -
ND	fig|273384.20.peg.2636	CXR25_13805	7	CXR25	2972445	CDS	CP025333	2972798	2972445	-2	-	354	Hypothetical protein	- none -
ND	fig|273384.20.peg.2637	CXR25_13810	7	CXR25	2972802	CDS	CP025333	2973836	2972802	-2	-	1035	Hypothetical protein	- none -
ND	fig|273384.20.peg.2639	CXR25_13820	7	CXR25	2974618	CDS	CP025333	2974863	2974618	-3	-	246	Hypothetical protein	- none -
ND	fig|273384.20.peg.2641	CXR25_13830	7	CXR25	2975755	CDS	CP025333	2979249	2975755	-3	-	3495	Hypothetical protein	- none -
ND	fig|273384.20.peg.2642	CXR25_13835	7	CXR25	2979246	CDS	CP025333	2980343	2979246	-2	-	1098	Hypothetical protein	- none -
ND	fig|273384.20.peg.2643	CXR25_13840	7	CXR25	2980352	CDS	CP025333	2981404	2980352	-1	-	1053	Hypothetical protein	- none -
ND	fig|273384.20.peg.2644	CXR25_13845	7	CXR25	2981407	CDS	CP025333	2982288	2981407	-3	-	882	Hypothetical protein	- none -
ND	fig|273384.20.peg.2646	CXR25_13855	7	CXR25	2987463	CDS	CP025333	2987723	2987463	-2	-	261	Hypothetical protein	- none -
ND	fig|273384.20.peg.2647	CXR25_13860	7	CXR25	2987768	CDS	CP025333	2988415	2987768	-1	-	648	Hypothetical protein	- none -
ND	fig|273384.20.peg.2648	CXR25_13865	7	CXR25	2988515	CDS	CP025333	2989045	2988515	-1	-	531	Hypothetical protein	- none -
ND	fig|273384.20.peg.2649	CXR25_13870	7	CXR25	2989051	CDS	CP025333	2989245	2989051	-3	-	195	Hypothetical protein	- none -
ND	fig|273384.20.peg.2650	CXR25_13875	7	CXR25	2989322	CDS	CP025333	2989726	2989322	-1	-	405	Hypothetical protein	- none -
ND	fig|273384.20.peg.2651	CXR25_13880	7	CXR25	2989726	CDS	CP025333	2990079	2989726	-3	-	354	Hypothetical protein	- none -
ND	fig|273384.20.peg.2652	CXR25_13885	7	CXR25	2990076	CDS	CP025333	2990525	2990076	-2	-	450	Hypothetical protein	- none -
ND	fig|273384.20.peg.2653	CXR25_13890	7	CXR25	2990522	CDS	CP025333	2990890	2990522	-1	-	369	Hypothetical protein	- none -
ND	fig|273384.20.peg.2655	CXR25_13900	7	CXR25	2992073	CDS	CP025333	2992420	2992073	-1	-	348	Hypothetical protein	- none -
ND	fig|273384.20.peg.2656	CXR25_13905	7	CXR25	2992423	CDS	CP025333	2993610	2992423	-3	-	1188	Hypothetical protein	- none -
ND	fig|273384.20.peg.2657	CXR25_13910	7	CXR25	2993607	CDS	CP025333	2994665	2993607	-2	-	1059	Hypothetical protein	- none -
ND	fig|273384.20.peg.2658	CXR25_13915	7	CXR25	2994703	CDS	CP025333	2996253	2994703	-3	-	1551	Hypothetical protein	- none -
ND	fig|273384.20.peg.2660	CXR25_13925	7	CXR25	2997764	CDS	CP025333	2997970	2997764	-1	-	207	Hypothetical protein	- none -
ND	fig|273384.20.peg.2661	CXR25_13930	7	CXR25	2998201	CDS	CP025333	2998935	2998201	-3	-	735	Hypothetical protein	- none -
ND	fig|273384.20.peg.2662	CXR25_13935	7	CXR25	2998928	CDS	CP025333	2999188	2998928	-1	-	261	Hypothetical protein	- none -
ND	fig|273384.20.peg.2663	CXR25_13940	7	CXR25	2999185	CDS	CP025333	2999481	2999185	-3	-	297	Hypothetical protein	- none -
ND	fig|273384.20.peg.2664	CXR25_13945	7	CXR25	2999478	CDS	CP025333	2999792	2999478	-2	-	315	Hypothetical protein	- none -
ND	fig|273384.20.peg.2665	CXR25_13950	7	CXR25	2999789	CDS	CP025333	3000049	2999789	-1	-	261	Hypothetical protein	- none -
ND	fig|273384.20.peg.2666	CXR25_13955	7	CXR25	3000046	CDS	CP025333	3000672	3000046	-3	-	627	Hypothetical protein	- none -
ND	fig|273384.20.peg.2667	CXR25_13960	7	CXR25	3000672	CDS	CP025333	3000884	3000672	-2	-	213	Hypothetical protein	- none -
ND	fig|273384.20.peg.2668	CXR25_13965	7	CXR25	3000970	CDS	CP025333	3000970	3001557	1	+	588	Hypothetical protein	- none -
ND	fig|273384.20.peg.2669	CXR25_13970	7	CXR25	3001624	CDS	CP025333	3002271	3001624	-3	-	648	Hypothetical protein	- none -
ND	fig|273384.20.peg.2670	CXR25_13975	7	CXR25	3002360	CDS	CP025333	3002360	3002554	2	+	195	Hypothetical protein	- none -
ND	fig|273384.20.peg.2671	CXR25_13980	7	CXR25	3002551	CDS	CP025333	3002736	3002551	-3	-	186	Hypothetical protein	- none -
ND	fig|273384.20.peg.2672	CXR25_13985	7	CXR25	3002891	CDS	CP025333	3003136	3002891	-1	-	246	Hypothetical protein	- none -
ND	fig|273384.20.peg.2673	CXR25_13990	7	CXR25	3003133	CDS	CP025333	3003417	3003133	-3	-	285	Hypothetical protein	- none -
ND	fig|273384.20.peg.2674	CXR25_13995	7	CXR25	3003620	CDS	CP025333	3004033	3003620	-1	-	414	Hypothetical protein	- none -
ND	fig|273384.20.peg.2675	CXR25_14005	7	CXR25	3004938	CDS	CP025333	3005129	3004938	-2	-	192	Hypothetical protein	- none -
ND	fig|273384.20.peg.2676	CXR25_14010	7	CXR25	3005139	CDS	CP025333	3005522	3005139	-2	-	384	Hypothetical protein	- none -
ND	fig|273384.20.peg.2677	CXR25_14015	7	CXR25	3005519	CDS	CP025333	3005872	3005519	-1	-	354	Hypothetical protein	- none -
ND	fig|273384.20.peg.2680	CXR25_14030	7	CXR25	3007805	CDS	CP025333	3008401	3007805	-1	-	597	Hypothetical protein	- none -
ND	fig|273384.20.peg.2685	CXR25_14055	7	CXR25	3011209	CDS	CP025333	3011394	3011209	-3	-	186	Hypothetical protein	- none -
ND	fig|273384.20.peg.2686	CXR25_14060	7	CXR25	3011394	CDS	CP025333	3011606	3011394	-2	-	213	Hypothetical protein	- none -
ND	fig|273384.20.peg.2687	CXR25_14065	7	CXR25	3011603	CDS	CP025333	3011794	3011603	-1	-	192	Hypothetical protein	- none -
ND	fig|273384.20.peg.2688	CXR25_14070	7	CXR25	3011925	CDS	CP025333	3012191	3011925	-2	-	267	Hypothetical protein	- none -
ND	fig|273384.20.peg.2690	CXR25_14080	7	CXR25	3013054	CDS	CP025333	3013371	3013054	-3	-	318	Hypothetical protein	- none -
ND	fig|273384.20.peg.2691	CXR25_14085	7	CXR25	3013513	CDS	CP025333	3013513	3014127	1	+	615	Hypothetical protein	- none -
ND	fig|273384.20.peg.2692	CXR25_14090	7	CXR25	3014124	CDS	CP025333	3014124	3014780	3	+	657	Hypothetical protein	- none -
ND	fig|273384.20.peg.2837	CXR25_14820	7	CXR25	3190028	CDS	CP025333	3190666	3190028	-1	-	639	Hypothetical protein	- none -
ND	fig|273384.20.peg.2863	CXR25_14950	7	CXR25	3224215	CDS	CP025333	3224403	3224215	-3	-	189	Hypothetical protein	- none -
ND	fig|273384.20.peg.3538	CXR25_18445	7	CXR25	3990718	CDS	CP025333	3990718	3991119	1	+	402	Hypothetical protein	- none -
ND	fig|273384.21.peg.166	CXR26_00895	4	CXR26	192721	CDS	CP025332	193134	192721	-3	-	414	Hypothetical protein	- none -
ND	fig|273384.21.peg.241	CXR26_01280	4	CXR26	270559	CDS	CP025332	270559	271329	1	+	771	Hypothetical protein	- none -
ND	fig|273384.21.peg.249	CXR26_01325	4	CXR26	279326	CDS	CP025332	279326	279526	2	+	201	Hypothetical protein	- none -
ND	fig|273384.21.peg.424	CXR26_02220	4	CXR26	486921	CDS	CP025332	487412	486921	-2	-	492	Hypothetical protein	- none -
ND	fig|273384.21.peg.425	CXR26_02225	4	CXR26	487409	CDS	CP025332	488275	487409	-1	-	867	Hypothetical protein	- none -
ND	fig|273384.21.peg.426	CXR26_02230	4	CXR26	489026	CDS	CP025332	489026	489535	2	+	510	Hypothetical protein	- none -
ND	fig|273384.21.peg.861	CXR26_04515	4	CXR26	976219	CDS	CP025332	976686	976219	-3	-	468	Hypothetical protein	- none -
ND	fig|273384.21.peg.862	CXR26_04520	4	CXR26	976688	CDS	CP025332	976688	978013	2	+	1326	Hypothetical protein	- none -
ND	fig|273384.21.peg.863	CXR26_04525	4	CXR26	978062	CDS	CP025332	978062	981832	2	+	3771	Hypothetical protein	- none -
ND	fig|273384.21.peg.864	CXR26_04530	4	CXR26	981996	CDS	CP025332	981996	982250	3	+	255	Hypothetical protein	- none -
ND	fig|273384.21.peg.867	CXR26_04545	4	CXR26	984494	CDS	CP025332	984494	984742	2	+	249	Hypothetical protein	- none -
ND	fig|273384.21.peg.870	CXR26_04560	4	CXR26	985650	CDS	CP025332	986177	985650	-2	-	528	Hypothetical protein	- none -
ND	fig|273384.21.peg.1281	CXR26_06725	4	CXR26	1440313	CDS	CP025332	1440663	1440313	-3	-	351	Hypothetical protein	- none -
ND	fig|273384.21.peg.1644	CXR26_08655	4	CXR26	1843518	CDS	CP025332	1843518	1844183	3	+	666	Hypothetical protein	- none -
ND	fig|273384.21.peg.2532	CXR26_13300	4	CXR26	2863998	CDS	CP025332	2863998	2865146	3	+	1149	Hypothetical protein	- none -
ND	fig|273384.21.peg.2535	CXR26_13315	4	CXR26	2868093	CDS	CP025332	2868093	2869460	3	+	1368	Hypothetical protein	- none -
ND	fig|273384.21.peg.2536	CXR26_13320	4	CXR26	2869769	CDS	CP025332	2870389	2869769	-1	-	621	Hypothetical protein	- none -
ND	fig|273384.21.peg.2540	CXR26_13340	4	CXR26	2874178	CDS	CP025332	2874783	2874178	-3	-	606	Hypothetical protein	- none -
ND	fig|273384.21.peg.2542	CXR26_13350	4	CXR26	2876331	CDS	CP025332	2876648	2876331	-2	-	318	Hypothetical protein	- none -
ND	fig|273384.21.peg.2554	CXR26_13415	4	CXR26	2892884	CDS	CP025332	2894215	2892884	-1	-	1332	Hypothetical protein	- none -
ND	fig|273384.21.peg.2561	CXR26_13455	4	CXR26	2906145	CDS	CP025332	2906462	2906145	-2	-	318	Hypothetical protein	- none -
ND	fig|273384.21.peg.2562	CXR26_13460	4	CXR26	2906718	CDS	CP025332	2907245	2906718	-2	-	528	Hypothetical protein	- none -
ND	fig|273384.21.peg.2563	CXR26_13465	4	CXR26	2907238	CDS	CP025332	2908134	2907238	-3	-	897	Hypothetical protein	- none -
ND	fig|273384.21.peg.2565	CXR26_13475	4	CXR26	2908740	CDS	CP025332	2908952	2908740	-2	-	213	Hypothetical protein	- none -
ND	fig|273384.21.peg.2566	CXR26_13480	4	CXR26	2908949	CDS	CP025332	2909323	2908949	-1	-	375	Hypothetical protein	- none -
ND	fig|273384.21.peg.2567	CXR26_13485	4	CXR26	2909479	CDS	CP025332	2910231	2909479	-3	-	753	Hypothetical protein	- none -
ND	fig|273384.21.peg.2568	CXR26_13490	4	CXR26	2910883	CDS	CP025332	2910883	2911062	1	+	180	Hypothetical protein	- none -
ND	fig|273384.21.peg.2963	CXR26_15540	4	CXR26	3360485	CDS	CP025332	3360485	3360961	2	+	477	Hypothetical protein	- none -
ND	fig|273384.21.peg.2964	CXR26_15545	4	CXR26	3361034	CDS	CP025332	3361034	3361495	2	+	462	Hypothetical protein	- none -
ND	fig|273384.21.peg.2965	CXR26_15550	4	CXR26	3361496	CDS	CP025332	3361496	3361738	2	+	243	Hypothetical protein	- none -
ND	fig|273384.21.peg.3049	CXR26_16000	4	CXR26	3452851	CDS	CP025332	3453261	3452851	-3	-	411	Hypothetical protein	- none -
ND	fig|273384.21.peg.3054	CXR26_16025	4	CXR26	3455718	CDS	CP025332	3455718	3455939	3	+	222	Hypothetical protein	- none -
ND	fig|273384.21.peg.3147	CXR26_16505	4	CXR26	3566066	CDS	CP025332	3566066	3566479	2	+	414	Hypothetical protein	- none -
ND	fig|273384.21.peg.3149	CXR26_16515	4	CXR26	3568009	CDS	CP025332	3568009	3568413	1	+	405	Hypothetical protein	- none -
ND	fig|273384.21.peg.3169	CXR26_16620	4	CXR26	3590217	CDS	CP025332	3590217	3590729	3	+	513	Hypothetical protein	- none -
ND	fig|273384.25.peg.296	CXR27_01545	5	CXR27	331999	CDS	CP025334	332454	331999	-3	-	456	Hypothetical protein	- none -
ND	fig|273384.25.peg.369	CXR27_01920	5	CXR27	415206	CDS	CP025334	415868	415206	-2	-	663	Hypothetical protein	- none -
ND	fig|273384.25.peg.457	CXR27_02370	5	CXR27	519316	CDS	CP025334	519846	519316	-3	-	531	Hypothetical protein	- none -
ND	fig|273384.25.peg.527	CXR27_02755	5	CXR27	619968	CDS	CP025334	619968	620186	3	+	219	Hypothetical protein	- none -
ND	fig|273384.25.peg.528	CXR27_02760	5	CXR27	620733	CDS	CP025334	620733	620930	3	+	198	Hypothetical protein	- none -
ND	fig|273384.25.peg.1058	CXR27_05545	5	CXR27	1221375	CDS	CP025334	1221725	1221375	-2	-	351	Hypothetical protein	- none -
ND	fig|273384.25.peg.1532	CXR27_08065	5	CXR27	1764252	CDS	CP025334	1764677	1764252	-2	-	426	Hypothetical protein	- none -
ND	fig|273384.25.peg.1538	CXR27_08095	5	CXR27	1769077	CDS	CP025334	1769400	1769077	-3	-	324	Hypothetical protein	- none -
ND	fig|273384.25.peg.1540	CXR27_08105	5	CXR27	1770071	CDS	CP025334	1770403	1770071	-1	-	333	Hypothetical protein	- none -
ND	fig|273384.25.peg.1542	CXR27_08115	5	CXR27	1773422	CDS	CP025334	1773718	1773422	-1	-	297	Hypothetical protein	- none -
ND	fig|273384.25.peg.1872	CXR27_09870	5	CXR27	2131610	CDS	CP025334	2133052	2131610	-1	-	1443	Hypothetical protein	- none -
ND	fig|273384.25.peg.2281	CXR27_12010	5	CXR27	2595322	CDS	CP025334	2595579	2595322	-3	-	258	Hypothetical protein	- none -
ND	fig|273384.25.peg.2285	CXR27_12030	5	CXR27	2599531	CDS	CP025334	2600595	2599531	-3	-	1065	Hypothetical protein	- none -
ND	fig|273384.25.peg.2289	CXR27_12050	5	CXR27	2603542	CDS	CP025334	2603542	2604330	1	+	789	Hypothetical protein	- none -
ND	fig|273384.25.peg.2362	CXR27_12455	5	CXR27	2708246	CDS	CP025334	2709391	2708246	-1	-	1146	Hypothetical protein	- none -
ND	fig|273384.25.peg.2369	CXR27_12495	5	CXR27	2723332	CDS	CP025334	2723332	2724537	1	+	1206	Hypothetical protein	- none -
ND	fig|273384.25.peg.2370	CXR27_12500	5	CXR27	2724534	CDS	CP025334	2724534	2725256	3	+	723	Hypothetical protein	- none -
ND	fig|273384.25.peg.2371	CXR27_12505	5	CXR27	2725708	CDS	CP025334	2728113	2725708	-3	-	2406	Hypothetical protein	- none -
ND	fig|273384.25.peg.2375	CXR27_12525	5	CXR27	2736662	CDS	CP025334	2736662	2737969	2	+	1308	Hypothetical protein	- none -
ND	fig|273384.25.peg.2382	CXR27_12560	5	CXR27	2747303	CDS	CP025334	2747303	2748130	2	+	828	Hypothetical protein	- none -
ND	fig|273384.25.peg.2712	CXR27_14295	5	CXR27	3124270	CDS	CP025334	3124270	3124557	1	+	288	Hypothetical protein	- none -
ND	fig|273384.25.peg.2758	CXR27_14545	5	CXR27	3180296	CDS	CP025334	3180296	3181111	2	+	816	Hypothetical protein	- none -
ND	fig|273384.25.peg.2761	CXR27_14560	5	CXR27	3185773	CDS	CP025334	3185773	3186408	1	+	636	Hypothetical protein	- none -
ND	fig|273384.25.peg.2762	CXR27_14565	5	CXR27	3186528	CDS	CP025334	3186528	3187310	3	+	783	Hypothetical protein	- none -
ND	fig|273384.25.peg.2768	CXR27_14595	5	CXR27	3191083	CDS	CP025334	3191910	3191083	-3	-	828	Hypothetical protein	- none -
ND	fig|273384.25.peg.2775	CXR27_14630	5	CXR27	3200599	CDS	CP025334	3200829	3200599	-3	-	231	Hypothetical protein	- none -
ND	fig|273384.25.peg.2778	CXR27_14645	5	CXR27	3202009	CDS	CP025334	3202009	3202317	1	+	309	Hypothetical protein	- none -
ND	fig|273384.25.peg.2784	CXR27_14685	5	CXR27	3209705	CDS	CP025334	3209705	3209929	2	+	225	Hypothetical protein	- none -
ND	fig|273384.25.peg.2789	CXR27_14710	5	CXR27	3216553	CDS	CP025334	3216553	3217461	1	+	909	Hypothetical protein	- none -
ND	fig|273384.25.peg.2791	CXR27_14720	5	CXR27	3218132	CDS	CP025334	3218132	3218557	2	+	426	Hypothetical protein	- none -
ND	fig|273384.25.peg.2792	CXR27_14725	5	CXR27	3218636	CDS	CP025334	3218636	3219505	2	+	870	Hypothetical protein	- none -
ND	fig|273384.25.peg.2794	CXR27_14735	5	CXR27	3220655	CDS	CP025334	3220655	3221350	2	+	696	Hypothetical protein	- none -
ND	fig|273384.25.peg.2800	CXR27_14765	5	CXR27	3226490	CDS	CP025334	3226490	3227272	2	+	783	Hypothetical protein	- none -
ND	fig|273384.25.peg.2804	CXR27_14785	5	CXR27	3233274	CDS	CP025334	3233274	3233768	3	+	495	Hypothetical protein	- none -
ND	fig|273384.25.peg.2807	CXR27_14800	5	CXR27	3236122	CDS	CP025334	3236122	3236709	1	+	588	Hypothetical protein	- none -
ND	fig|273384.25.peg.2995	CXR27_15790	5	CXR27	3458923	CDS	CP025334	3459219	3458923	-3	-	297	Hypothetical protein	- none -
ND	fig|273384.25.peg.2996	CXR27_15795	5	CXR27	3459256	CDS	CP025334	3459256	3459558	1	+	303	Hypothetical protein	- none -
ND	fig|273384.25.peg.3662	CXR27_19305	5	CXR27	4239612	CDS	CP025334	4239612	4239923	3	+	312	Hypothetical protein	- none -
ND	fig|273384.19.peg.3566	BAUR9175_03616	1	BAUR9175	16551	CDS	FXZB01000039	16967	16551	-2	-	417	Hypothetical protein PA1329	- none -
ND	fig|273384.25.peg.2765	CXR27_14580	5	CXR27	3189039	CDS	CP025334	3189039	3189890	3	+	852	HYPOTHETICAL TRANSMEMBRANE PROTEIN	- none -
ND	fig|273384.16.peg.3790	BAURA63_03847	2	BAURA63	3	CDS	FXYZ01000077	3	689	3	+	687	Insertion element conserved hypothetical protein	- none -
ND	fig|273384.16.peg.2270	BAURA63_02301	2	BAURA63	158238	CDS	FXYZ01000008	159242	158238	-2	-	1005	Integral membrane protein	- none -
ND	fig|273384.15.peg.470	BAURA86_00481	6	BAURA86	524743	CDS	FXZI01000001	526245	524743	-3	-	1503	Integral membrane protein	- none -
ND	fig|273384.21.peg.45	CXR26_00255	4	CXR26	54304	CDS	CP025332	54304	54789	1	+	486	Integral-membrane protein	- none -
ND	fig|273384.19.peg.3033	BAUR9175_03078	1	BAUR9175	57034	CDS	FXZB01000023	58119	57034	-3	-	1086	Integrase	- none -
ND	fig|273384.19.peg.2423	BAUR9175_02454	1	BAUR9175	94113	CDS	FXZB01000016	94113	95039	3	+	927	Integrase	- none -
ND	fig|273384.17.peg.3532	BAUR920_03582	8	BAUR920	638	CDS	FXZG01000042	638	1684	2	+	1047	Integrase	- none -
ND	fig|273384.17.peg.289	BAUR920_00295	8	BAUR920	324596	CDS	FXZG01000001	324596	325423	2	+	828	Integrase	- none -
ND	fig|1703.41.peg.2764	BLSMQ_RS14390	0	BLSMQ	3131260	CDS	NZ_CP017150	3131260	3131997	1	+	738	Integrase	- none -
ND	fig|1703.41.peg.2767	BLSMQ_RS14405	0	BLSMQ	3134578	CDS	NZ_CP017150	3134578	3134943	1	+	366	Integrase	- none -
ND	fig|273384.20.peg.691	CXR25_03630	7	CXR25	789845	CDS	CP025333	789845	790708	2	+	864	Integrase	- none -
ND	fig|273384.16.peg.3612	BAURA63_03664	2	BAURA63	11412	CDS	FXYZ01000034	12824	11412	-2	-	1413	Integrase homolog, putative	- none -
ND	fig|273384.15.peg.894	BAURA86_00909	6	BAURA86	341804	CDS	FXZI01000002	341804	342598	2	+	795	Integrase/recombinase	- none -
ND	fig|273384.26.peg.2805	CXR23_14910	10	CXR23	3223376	CDS	CP025330	3223376	3224581	2	+	1206	Integrins alpha chain precursor	- none -
ND	fig|273384.16.peg.3623	BAURA63_03675	2	BAURA63	10795	CDS	FXYZ01000035	11130	10795	-3	-	336	Iron utilization protein	- none -
ND	fig|273384.17.peg.1146	BAUR920_01171	8	BAUR920	85592	CDS	FXZG01000005	86473	85592	-1	-	882	iron-chelator utilization protein	- none -
ND	fig|273384.15.peg.3867	BAURA86_03920	6	BAURA86	11459	CDS	FXZI01000026	11459	13324	2	+	1866	iron-chelator utilization protein	- none -
ND	fig|273384.16.peg.2838	BAURA63_02880	2	BAURA63	107556	CDS	FXYZ01000013	107556	108101	3	+	546	Kinesin-related protein K4	- none -
ND	fig|273384.15.peg.3876	BAURA86_03929	6	BAURA86	391	CDS	FXZI01000027	822	391	-3	-	432	Lactoylglutathione lyase and related lyases	- none -
ND	fig|273384.26.peg.392	CXR23_02080	10	CXR23	448542	CDS	CP025330	450191	448542	-2	-	1650	L-aspartate beta-decarboxylase (EC 4.1.1.12)	- none -
ND	fig|273384.15.peg.2444	BAURA86_02483	6	BAURA86	1994	CDS	FXZI01000009	3886	1994	-1	-	1893	Lipid A export ATP-binding/permease protein MsbA	- none -
ND	fig|273384.15.peg.2445	BAURA86_02484	6	BAURA86	3883	CDS	FXZI01000009	5622	3883	-3	-	1740	Lipid A export ATP-binding/permease protein MsbA	- none -
ND	fig|1703.46.peg.1221	CIK79_RS06380	9	CIK79	3989462	CDS	NZ_NRGX01000001	1439286	1438063	-3	-	1224	Lipopolysaccharide biosynthesis protein RffA	- none -
ND	fig|273384.20.peg.2866	CXR25_14970	7	CXR25	3226156	CDS	CP025333	3227574	3226156	-3	-	1419	LmbE-like protein / Methyltransferase type 12	- none -
ND	fig|273384.17.peg.1842	BAUR920_01870	8	BAUR920	150352	CDS	FXZG01000009	152826	150352	-3	-	2475	LPXTG-motif cell wall anchor domain-containing protein	- none -
ND	fig|1703.46.peg.37	CIK79_RS00185	9	CIK79	2600669	CDS	NZ_NRGX01000001	50448	49270	-3	-	1179	LysM domain / Lipoprotein NlpD	Stationary phase repair cluster
ND	fig|273384.26.peg.2793	CXR23_14850	10	CXR23	3210254	CDS	CP025330	3210254	3211486	2	+	1233	Lysophospholipid acyltransferase	- none -
ND	fig|273384.26.peg.3347	CXR23_17725	10	CXR23	3841936	CDS	CP025330	3843495	3841936	-3	-	1560	Major facilitator superfamily MFS_1	- none -
ND	fig|1703.41.peg.2964	BLSMQ_RS15410	0	BLSMQ	3358013	CDS	NZ_CP017150	3358408	3358013	-1	-	396	Malonate transporter, MadL subunit	- none -
ND	fig|1703.41.peg.2963	BLSMQ_RS15405	0	BLSMQ	3357252	CDS	NZ_CP017150	3358013	3357252	-2	-	762	Malonate transporter, MadM subunit	- none -
ND	fig|273384.19.peg.2335	BAUR9175_02366	1	BAUR9175	123239	CDS	FXZB01000015	123239	123997	2	+	759	Maltose O-acetyltransferase (EC 2.3.1.79)	- none -
ND	fig|273384.17.peg.3335	BAUR920_03382	8	BAUR920	16849	CDS	FXZG01000030	16849	17355	1	+	507	MaoC family protein	- none -
ND	fig|273384.17.peg.391	BAUR920_00401	8	BAUR920	110154	CDS	FXZG01000002	110154	110660	3	+	507	MaoC-related acyl dehydratase	- none -
ND	fig|1703.46.peg.2068	CIK79_RS10775	9	CIK79	648441	CDS	NZ_NRGX01000001	2407656	2409332	3	+	1677	Medium-chain-fatty-acid--CoA ligase (EC 6.2.1.-)	- none -
ND	fig|273384.21.peg.2165	CXR26_11375	4	CXR26	2438363	CDS	CP025332	2438363	2438857	2	+	495	Membrane glycoprotein	- none -
ND	fig|273384.21.peg.3253	CXR26_17065	4	CXR26	3690128	CDS	CP025332	3690316	3690128	-1	-	189	Membrane protein involved in the export of O-antigen, teichoic acid lipoteichoic acids	- none -
ND	fig|273384.21.peg.3254	CXR26_17070	4	CXR26	3690334	CDS	CP025332	3690984	3690334	-3	-	651	Membrane protein involved in the export of O-antigen, teichoic acid lipoteichoic acids	- none -
ND	fig|273384.16.peg.3120	BAURA63_03169	2	BAURA63	45897	CDS	FXYZ01000017	45897	47012	3	+	1116	Membrane proteins related to metalloendopeptidases	- none -
ND	fig|273384.26.peg.3370	CXR23_17845	10	CXR23	3864218	CDS	CP025330	3864218	3864580	2	+	363	MerR-family transcriptional regulator	- none -
ND	fig|273384.17.peg.2558	BAUR920_02599	8	BAUR920	17243	CDS	FXZG01000016	17243	18574	2	+	1332	Metabolite-proton symporter	- none -
ND	fig|273384.26.peg.2831	CXR23_15045	10	CXR23	3250080	CDS	CP025330	3250080	3250841	3	+	762	Methyltransferase (EC 2.1.1.-)	- none -
ND	fig|273384.17.peg.1360	BAUR920_01387	8	BAUR920	120894	CDS	FXZG01000006	121421	120894	-2	-	528	MFS general substrate transporter	- none -
ND	fig|273384.17.peg.1361	BAUR920_01388	8	BAUR920	121360	CDS	FXZG01000006	122073	121360	-3	-	714	MFS general substrate transporter	- none -
ND	fig|273384.25.peg.2283	CXR27_12020	5	CXR27	2596464	CDS	CP025334	2597630	2596464	-2	-	1167	MFS transporter, DHA1 family	- none -
ND	fig|1703.46.peg.3028	CIK79_RS15805	9	CIK79	1736673	CDS	NZ_NRGX01000001	3495888	3496937	3	+	1050	Microcin C7 self-immunity protein mccF	- none -
ND	fig|273384.17.peg.282	BAUR920_00288	8	BAUR920	316172	CDS	FXZG01000001	317098	316172	-1	-	927	MJ0042 family finger-like protein	- none -
ND	fig|273384.15.peg.545	BAURA86_00557	6	BAURA86	610757	CDS	FXZI01000001	611365	610757	-1	-	609	MobC protein	- none -
ND	fig|273384.19.peg.3605	BAUR9175_03655	1	BAUR9175	138	CDS	FXZB01000042	138	509	3	+	372	Mobile element protein	- none -
ND	fig|273384.19.peg.3654	BAUR9175_03704	1	BAUR9175	6558	CDS	FXZB01000044	7250	6558	-2	-	693	Mobile element protein	- none -
ND	fig|273384.19.peg.3100	BAUR9175_03145	1	BAUR9175	10416	CDS	FXZB01000025	11441	10416	-2	-	1026	Mobile element protein	- none -
ND	fig|273384.19.peg.336	BAUR9175_00343	1	BAUR9175	24953	CDS	FXZB01000002	24953	26263	2	+	1311	Mobile element protein	- none -
ND	fig|273384.19.peg.3140	BAUR9175_03185	1	BAUR9175	54386	CDS	FXZB01000025	54386	54673	2	+	288	Mobile element protein	- none -
ND	fig|273384.17.peg.3573	BAUR920_03627	8	BAUR920	222	CDS	FXZG01000050	222	1550	3	+	1329	Mobile element protein	- none -
ND	fig|273384.17.peg.3579	BAUR920_03633	8	BAUR920	1030	CDS	FXZG01000053	1677	1030	-3	-	648	Mobile element protein	- none -
ND	fig|273384.17.peg.3574	BAUR920_03628	8	BAUR920	1580	CDS	FXZG01000050	1580	2530	2	+	951	Mobile element protein	- none -
ND	fig|273384.17.peg.3580	BAUR920_03634	8	BAUR920	1677	CDS	FXZG01000053	1967	1677	-2	-	291	Mobile element protein	- none -
ND	fig|273384.17.peg.3338	BAUR920_03385	8	BAUR920	20441	CDS	FXZG01000030	20761	20441	-1	-	321	Mobile element protein	- none -
ND	fig|273384.17.peg.2537	BAUR920_02578	8	BAUR920	102990	CDS	FXZG01000015	103373	102990	-2	-	384	Mobile element protein	- none -
ND	fig|273384.17.peg.2323	BAUR920_02363	8	BAUR920	133819	CDS	FXZG01000013	133819	134271	1	+	453	Mobile element protein	- none -
ND	fig|273384.16.peg.3310	BAURA63_03359	2	BAURA63	315	CDS	FXYZ01000022	677	315	-2	-	363	Mobile element protein	- none -
ND	fig|273384.16.peg.3760	BAURA63_03816	2	BAURA63	506	CDS	FXYZ01000061	506	1066	2	+	561	Mobile element protein	- none -
ND	fig|273384.16.peg.3785	BAURA63_03842	2	BAURA63	621	CDS	FXYZ01000074	621	869	3	+	249	Mobile element protein	- none -
ND	fig|273384.16.peg.3811	BAURA63_03868	2	BAURA63	655	CDS	FXYZ01000088	655	1050	1	+	396	Mobile element protein	- none -
ND	fig|273384.16.peg.3782	BAURA63_03839	2	BAURA63	828	CDS	FXYZ01000073	1148	828	-2	-	321	Mobile element protein	- none -
ND	fig|273384.16.peg.3783	BAURA63_03840	2	BAURA63	1148	CDS	FXYZ01000073	1384	1148	-1	-	237	Mobile element protein	- none -
ND	fig|273384.16.peg.3747	BAURA63_03803	2	BAURA63	1666	CDS	FXYZ01000057	1872	1666	-3	-	207	Mobile element protein	- none -
ND	fig|273384.16.peg.3762	BAURA63_03818	2	BAURA63	1994	CDS	FXYZ01000061	1994	2329	2	+	336	Mobile element protein	- none -
ND	fig|273384.16.peg.3741	BAURA63_03795	2	BAURA63	3367	CDS	FXYZ01000054	3367	3501	1	+	135	Mobile element protein	- none -
ND	fig|273384.16.peg.3689	BAURA63_03743	2	BAURA63	4911	CDS	FXYZ01000043	5315	4911	-2	-	405	Mobile element protein	- none -
ND	fig|273384.16.peg.816	BAURA63_00829	2	BAURA63	7086	CDS	FXYZ01000003	7086	7973	3	+	888	Mobile element protein	- none -
ND	fig|273384.16.peg.584	BAURA63_00591	2	BAURA63	87319	CDS	FXYZ01000002	87319	87981	1	+	663	Mobile element protein	- none -
ND	fig|273384.16.peg.735	BAURA63_00746	2	BAURA63	256646	CDS	FXYZ01000002	256646	257827	2	+	1182	Mobile element protein	- none -
ND	fig|273384.16.peg.1664	BAURA63_01691	2	BAURA63	287537	CDS	FXYZ01000005	287537	287671	2	+	135	Mobile element protein	- none -
ND	fig|273384.15.peg.3998	BAURA86_04055	6	BAURA86	1	CDS	FXZI01000049	1086	1	-3	-	1086	Mobile element protein	- none -
ND	fig|273384.15.peg.3974	BAURA86_04030	6	BAURA86	830	CDS	FXZI01000039	1429	830	-1	-	600	Mobile element protein	- none -
ND	fig|273384.15.peg.3978	BAURA86_04035	6	BAURA86	1499	CDS	FXZI01000040	1499	1771	2	+	273	Mobile element protein	- none -
ND	fig|273384.15.peg.3975	BAURA86_04031	6	BAURA86	1768	CDS	FXZI01000039	2814	1768	-3	-	1047	Mobile element protein	- none -
ND	fig|273384.15.peg.3793	BAURA86_03843	6	BAURA86	3417	CDS	FXZI01000024	3417	4208	3	+	792	Mobile element protein	- none -
ND	fig|273384.15.peg.1388	BAURA86_01409	6	BAURA86	9321	CDS	FXZI01000004	9321	10079	3	+	759	Mobile element protein	- none -
ND	fig|273384.15.peg.2453	BAURA86_02492	6	BAURA86	11898	CDS	FXZI01000009	12116	11898	-2	-	219	Mobile element protein	- none -
ND	fig|273384.15.peg.3906	BAURA86_03959	6	BAURA86	12384	CDS	FXZI01000028	13760	12384	-2	-	1377	Mobile element protein	- none -
ND	fig|273384.15.peg.3907	BAURA86_03960	6	BAURA86	13811	CDS	FXZI01000028	14107	13811	-1	-	297	Mobile element protein	- none -
ND	fig|273384.15.peg.3699	BAURA86_03749	6	BAURA86	42196	CDS	FXZI01000021	43035	42196	-3	-	840	Mobile element protein	- none -
ND	fig|273384.15.peg.1834	BAURA86_01865	6	BAURA86	235357	CDS	FXZI01000005	235357	237030	1	+	1674	Mobile element protein	- none -
ND	fig|273384.15.peg.1368	BAURA86_01389	6	BAURA86	336693	CDS	FXZI01000003	336693	338105	3	+	1413	Mobile element protein	- none -
ND	fig|273384.15.peg.892	BAURA86_00907	6	BAURA86	339947	CDS	FXZI01000002	339947	340885	2	+	939	Mobile element protein	- none -
ND	fig|273384.15.peg.893	BAURA86_00908	6	BAURA86	340882	CDS	FXZI01000002	340882	341811	1	+	930	Mobile element protein	- none -
ND	fig|273384.15.peg.895	BAURA86_00910	6	BAURA86	342595	CDS	FXZI01000002	342595	342798	1	+	204	Mobile element protein	- none -
ND	fig|273384.15.peg.547	BAURA86_00559	6	BAURA86	612710	CDS	FXZI01000001	613042	612710	-1	-	333	Mobile element protein	- none -
ND	fig|273384.15.peg.548	BAURA86_00560	6	BAURA86	613140	CDS	FXZI01000001	613745	613140	-2	-	606	Mobile element protein	- none -
ND	fig|273384.15.peg.552	BAURA86_00564	6	BAURA86	616387	CDS	FXZI01000001	616836	616387	-3	-	450	Mobile element protein	- none -
ND	fig|273384.15.peg.555	BAURA86_00567	6	BAURA86	618090	CDS	FXZI01000001	619364	618090	-2	-	1275	Mobile element protein	- none -
ND	fig|1703.41.peg.288	BLSMQ_RS01495	0	BLSMQ	332020	CDS	NZ_CP017150	332217	332020	-3	-	198	Mobile element protein	- none -
ND	fig|1703.41.peg.1961	BLSMQ_RS10195	0	BLSMQ	2194326	CDS	NZ_CP017150	2194326	2195477	3	+	1152	Mobile element protein	- none -
ND	fig|1703.41.peg.1968	BLSMQ_RS10250	0	BLSMQ	2203528	CDS	NZ_CP017150	2203528	2204238	1	+	711	Mobile element protein	- none -
ND	fig|1703.41.peg.2952	BLSMQ_RS15355	0	BLSMQ	3348353	CDS	NZ_CP017150	3349246	3348353	-1	-	894	Mobile element protein	- none -
ND	fig|1703.41.peg.2953	BLSMQ_RS15360	0	BLSMQ	3349213	CDS	NZ_CP017150	3349647	3349213	-3	-	435	Mobile element protein	- none -
ND	fig|1703.46.peg.2019	CIK79_RS10520	9	CIK79	595125	CDS	NZ_NRGX01000001	2354340	2354669	3	+	330	Mobile element protein	- none -
ND	fig|273384.26.peg.288	CXR23_01535	10	CXR23	322517	CDS	CP025330	323857	322517	-1	-	1341	Mobile element protein	- none -
ND	fig|273384.26.peg.387	CXR23_02055	10	CXR23	443975	CDS	CP025330	445315	443975	-1	-	1341	Mobile element protein	- none -
ND	fig|273384.26.peg.389	CXR23_02065	10	CXR23	445870	CDS	CP025330	447092	445870	-2	-	1224	Mobile element protein	- none -
ND	fig|273384.26.peg.402	CXR23_02135	10	CXR23	461706	CDS	CP025330	461706	461888	3	+	183	Mobile element protein	- none -
ND	fig|273384.26.peg.890	CXR23_04740	10	CXR23	1041274	CDS	CP025330	1042614	1041274	-3	-	1341	Mobile element protein	- none -
ND	fig|273384.26.peg.1086	CXR23_05765	10	CXR23	1248350	CDS	CP025330	1249690	1248350	-1	-	1341	Mobile element protein	- none -
ND	fig|273384.26.peg.1153	CXR23_06160	10	CXR23	1319910	CDS	CP025330	1319910	1321250	3	+	1341	Mobile element protein	- none -
ND	fig|273384.26.peg.1332	CXR23_07115	10	CXR23	1511836	CDS	CP025330	1512180	1511836	-3	-	345	Mobile element protein	- none -
ND	fig|273384.26.peg.1337	CXR23_07140	10	CXR23	1519549	CDS	CP025330	1520106	1519549	-3	-	558	Mobile element protein	- none -
ND	fig|273384.26.peg.2426	CXR23_12920	10	CXR23	2782314	CDS	CP025330	2782314	2783654	3	+	1341	Mobile element protein	- none -
ND	fig|273384.26.peg.2724	CXR23_14490	10	CXR23	3120931	CDS	CP025330	3120931	3122271	1	+	1341	Mobile element protein	- none -
ND	fig|273384.26.peg.2791	CXR23_14835	10	CXR23	3206660	CDS	CP025330	3206660	3207706	2	+	1047	Mobile element protein	- none -
ND	fig|273384.26.peg.3550	CXR23_18805	10	CXR23	4093172	CDS	CP025330	4093172	4094188	2	+	1017	Mobile element protein	- none -
ND	fig|273384.22.peg.491	CXR24_02580	3	CXR24	579957	CDS	CP025331	579957	580133	3	+	177	Mobile element protein	- none -
ND	fig|273384.21.peg.1179	CXR26_06195	4	CXR26	1318021	CDS	CP025332	1318021	1319328	1	+	1308	Mobile element protein	- none -
ND	fig|273384.21.peg.1309	CXR26_06875	4	CXR26	1467525	CDS	CP025332	1468832	1467525	-2	-	1308	Mobile element protein	- none -
ND	fig|273384.21.peg.2204	CXR26_11590	4	CXR26	2501676	CDS	CP025332	2502983	2501676	-2	-	1308	Mobile element protein	- none -
ND	fig|273384.21.peg.2975	CXR26_15600	4	CXR26	3368910	CDS	CP025332	3370217	3368910	-2	-	1308	Mobile element protein	- none -
ND	fig|273384.21.peg.3216	CXR26_16855	4	CXR26	3645222	CDS	CP025332	3645222	3646529	3	+	1308	Mobile element protein	- none -
ND	fig|273384.25.peg.2782	CXR27_14675	5	CXR27	3206955	CDS	CP025334	3208064	3206955	-2	-	1110	Mobile element protein	- none -
ND	fig|273384.25.peg.1537	CXR27_08090	5	CXR27	1767842	CDS	CP025334	1769080	1767842	-1	-	1239	Mobilization protein	- none -
ND	fig|273384.15.peg.650	BAURA86_00662	6	BAURA86	87153	CDS	FXZI01000002	87770	87153	-2	-	618	Monooxygenase, putative	- none -
ND	fig|273384.15.peg.651	BAURA86_00663	6	BAURA86	87790	CDS	FXZI01000002	88212	87790	-3	-	423	Monooxygenase, putative	- none -
ND	fig|1703.41.peg.2667	BLSMQ_RS13875	0	BLSMQ	3026625	CDS	NZ_CP017150	3027737	3026625	-2	-	1113	MoxR-like ATPases	- none -
ND	fig|273384.16.peg.2387	BAURA63_02421	2	BAURA63	134833	CDS	FXYZ01000009	135774	134833	-3	-	942	Mrr restriction system protein	- none -
ND	fig|1703.46.peg.71	CIK79_RS00360	9	CIK79	2638278	CDS	NZ_NRGX01000001	86879	87667	2	+	789	Multidrug ABC transporter permease	- none -
ND	fig|273384.17.peg.2630	BAUR920_02671	8	BAUR920	63	CDS	FXZG01000017	1067	63	-2	-	1005	Multidrug resistance ABC transporter ATP-binding and permease protein	- none -
ND	fig|273384.17.peg.3055	BAUR920_03101	8	BAUR920	141	CDS	FXZG01000023	141	965	3	+	825	Multidrug resistance ABC transporter ATP-binding and permease protein	- none -
ND	fig|273384.19.peg.2743	BAUR9175_02779	1	BAUR9175	84637	CDS	FXZB01000019	86115	84637	-3	-	1479	N-acyl-D-aspartate/D-glutamate deacylase	- none -
ND	fig|273384.26.peg.2948	CXR23_15665	10	CXR23	3391321	CDS	CP025330	3391321	3392859	1	+	1539	N-acyl-D-aspartate/D-glutamate deacylase	- none -
ND	fig|273384.15.peg.2448	BAURA86_02487	6	BAURA86	8183	CDS	FXZI01000009	8998	8183	-1	-	816	NADH oxidase	- none -
ND	fig|273384.15.peg.472	BAURA86_00483	6	BAURA86	527215	CDS	FXZI01000001	527215	530373	1	+	3159	NADPH-cytochrome P450 reductase	- none -
ND	fig|273384.15.peg.873	BAURA86_00888	6	BAURA86	323109	CDS	FXZI01000002	323109	323519	3	+	411	NUDIX hydrolase	- none -
ND	fig|273384.26.peg.403	CXR23_02145	10	CXR23	462533	CDS	CP025330	462533	463336	2	+	804	Oleate hydratase (EC 4.2.1.53)	- none -
ND	fig|273384.15.peg.494	BAURA86_00505	6	BAURA86	554014	CDS	FXZI01000001	554727	554014	-3	-	714	ORF55	- none -
ND	fig|273384.26.peg.2839	CXR23_15085	10	CXR23	3261051	CDS	CP025330	3261389	3261051	-2	-	339	ORF55	- none -
ND	fig|273384.22.peg.3320	CXR24_17400	3	CXR24	3810727	CDS	CP025331	3811971	3810727	-3	-	1245	Orn/DAP/Arg decarboxylase family protein	- none -
ND	fig|273384.15.peg.884	BAURA86_00899	6	BAURA86	332619	CDS	FXZI01000002	333446	332619	-2	-	828	Oxidoreductase	- none -
ND	fig|1703.46.peg.58	CIK79_RS00290	9	CIK79	2623914	CDS	NZ_NRGX01000001	73324	72515	-1	-	810	Oxidoreductase	- none -
ND	fig|273384.26.peg.3362	CXR23_17805	10	CXR23	3856940	CDS	CP025330	3857902	3856940	-1	-	963	Oxidoreductase	- none -
ND	fig|273384.26.peg.1965	CXR23_10480	10	CXR23	2229837	CDS	CP025330	2230094	2229837	-2	-	258	Oxidoreductase, molybdopterin-binding	- none -
ND	fig|273384.25.peg.2773	CXR27_14620	5	CXR27	3198394	CDS	CP025334	3198394	3199212	1	+	819	Peptidase M48, Ste24p precursor	- none -
ND	fig|273384.22.peg.2863	CXR24_15000	3	CXR24	3276439	CDS	CP025331	3276439	3276951	1	+	513	Periplasmic aromatic aldehyde oxidoreductase, iron-sulfur subunit YagT	- none -
ND	fig|273384.16.peg.3761	BAURA63_03817	2	BAURA63	1163	CDS	FXYZ01000061	1163	1582	2	+	420	Permease of the major facilitator superfamily	- none -
ND	fig|273384.17.peg.3208	BAUR920_03255	8	BAUR920	21751	CDS	FXZG01000026	21751	23073	1	+	1323	Permeases of the major facilitator superfamily	- none -
ND	fig|273384.26.peg.1396	CXR23_07445	10	CXR23	1592784	CDS	CP025330	1593257	1592784	-2	-	474	Permeases of the major facilitator superfamily	- none -
ND	fig|273384.20.peg.2689	CXR25_14075	7	CXR25	3012188	CDS	CP025333	3013045	3012188	-1	-	858	Phage antirepressor protein	- none -
ND	fig|273384.15.peg.1763	BAURA86_01791	6	BAURA86	155521	CDS	FXZI01000005	155521	156360	1	+	840	Phage excisionase	- none -
ND	fig|273384.15.peg.880	BAURA86_00895	6	BAURA86	328602	CDS	FXZI01000002	329306	328602	-2	-	705	Phage excisionase	- none -
ND	fig|273384.15.peg.475	BAURA86_00486	6	BAURA86	532744	CDS	FXZI01000001	532744	533409	1	+	666	Phage excisionase	- none -
ND	fig|273384.26.peg.2809	CXR23_14930	10	CXR23	3228233	CDS	CP025330	3228233	3229054	2	+	822	Phage excisionase	- none -
ND	fig|273384.15.peg.2908	BAURA86_02952	6	BAURA86	145295	CDS	FXZI01000011	145295	145708	2	+	414	Phage excisionase # putative	- none -
ND	fig|1703.46.peg.44	CIK79_RS00220	9	CIK79	2606603	CDS	NZ_NRGX01000001	55947	55204	-3	-	744	Phage excisionase # putative	- none -
ND	fig|273384.25.peg.2790	CXR27_14715	5	CXR27	3217503	CDS	CP025334	3217503	3218135	3	+	633	Phage excisionase # putative	- none -
ND	fig|1703.41.peg.1896	BLSMQ_RS09845	0	BLSMQ	2126512	CDS	NZ_CP017150	2126512	2127441	1	+	930	Phage integrase family protein	- none -
ND	fig|273384.15.peg.3845	BAURA86_03898	6	BAURA86	18476	CDS	FXZI01000025	19090	18476	-1	-	615	Phage protein	- none -
ND	fig|273384.15.peg.463	BAURA86_00474	6	BAURA86	515669	CDS	FXZI01000001	517207	515669	-1	-	1539	Phage protein	- none -
ND	fig|273384.26.peg.2340	CXR23_12440	10	CXR23	2662734	CDS	CP025330	2663609	2662734	-2	-	876	Phage protein	- none -
ND	fig|273384.15.peg.1742	BAURA86_01770	6	BAURA86	132945	CDS	FXZI01000005	134699	132945	-2	-	1755	Phage T7 exclusion protein	CBSS-159087.4.peg.2189
ND	fig|273384.15.peg.898	BAURA86_00913	6	BAURA86	347401	CDS	FXZI01000002	347401	349335	1	+	1935	Phage T7 exclusion protein	CBSS-159087.4.peg.2189
ND	fig|273384.20.peg.2682	CXR25_14040	7	CXR25	3008666	CDS	CP025333	3009511	3008666	-1	-	846	Phage virulence-associated protein	- none -
ND	fig|273384.20.peg.689	CXR25_03620	7	CXR25	787942	CDS	CP025333	787942	788835	1	+	894	Phage-associated homing endonuclease	- none -
ND	fig|273384.20.peg.2684	CXR25_14050	7	CXR25	3010017	CDS	CP025333	3011042	3010017	-2	-	1026	Phage-related protein	- none -
ND	fig|273384.16.peg.627	BAURA63_00634	2	BAURA63	136888	CDS	FXYZ01000002	136888	137283	1	+	396	Phenazine biosynthesis protein PhzF like	- none -
ND	fig|273384.15.peg.544	BAURA86_00556	6	BAURA86	609954	CDS	FXZI01000001	610760	609954	-2	-	807	Phenylacetic acid degradation operon negative regulatory protein paaX	- none -
ND	fig|273384.17.peg.3342	BAUR920_03389	8	BAUR920	23210	CDS	FXZG01000030	23377	23210	-1	-	168	Phosphoglycerate mutase family protein	- none -
ND	fig|273384.16.peg.3518	BAURA63_03567	2	BAURA63	19233	CDS	FXYZ01000028	21437	19233	-2	-	2205	Phosphopantothenoylcysteine synthetase/decarboxylase	- none -
ND	fig|273384.15.peg.411	BAURA86_00420	6	BAURA86	462466	CDS	FXZI01000001	463086	462466	-3	-	621	Phosphoserine phosphatase	- none -
ND	fig|273384.16.peg.2371	BAURA63_02405	2	BAURA63	118764	CDS	FXYZ01000009	119606	118764	-2	-	843	Phosphosulfolactate synthase (EC 4.4.1.19)	- none -
ND	fig|273384.26.peg.2422	CXR23_12900	10	CXR23	2771392	CDS	CP025330	2774016	2771392	-3	-	2625	PHP N-terminal domain protein	- none -
ND	fig|273384.17.peg.3339	BAUR920_03386	8	BAUR920	20932	CDS	FXZG01000030	20932	21324	1	+	393	PIN domain-containing protein	- none -
ND	fig|273384.19.peg.3216	BAUR9175_03261	1	BAUR9175	28749	CDS	FXZB01000027	28749	30722	3	+	1974	Plasmid-related protein	- none -
ND	fig|273384.17.peg.393	BAUR920_00403	8	BAUR920	111623	CDS	FXZG01000002	112498	111623	-1	-	876	Polar amino acid ABC transporter, inner membrane subunit	- none -
ND	fig|273384.22.peg.2840	CXR24_14885	3	CXR24	3251977	CDS	CP025331	3253794	3251977	-3	-	1818	Poly(glycerol-phosphate) alpha-glucosyltransferase (EC 2.4.1.52)	- none -
ND	fig|273384.26.peg.1340	CXR23_07155	10	CXR23	1524311	CDS	CP025330	1524311	1525165	2	+	855	Polysaccharide deacetylase	- none -
ND	fig|273384.20.peg.469	CXR25_02440	7	CXR25	534606	CDS	CP025333	534606	537680	3	+	3075	Polysaccharide pyruvyl transferase	- none -
ND	fig|273384.21.peg.1319	CXR26_06925	4	CXR26	1481870	CDS	CP025332	1482082	1481870	-1	-	213	Possible integral membrane protein	- none -
ND	fig|273384.22.peg.1542	CXR24_08090	3	CXR24	1752455	CDS	CP025331	1752455	1753732	2	+	1278	Possible oxidoreductase (EC 1.-.-.-)	- none -
ND	fig|273384.25.peg.2364	CXR27_12465	5	CXR27	2713097	CDS	CP025334	2717083	2713097	-1	-	3987	Possible restriction /modification enzyme	- none -
ND	fig|273384.26.peg.3487	CXR23_18485	10	CXR23	4018097	CDS	CP025330	4018813	4018097	-1	-	717	Possible transcriptional regulatory protein	- none -
ND	fig|273384.21.peg.2530	CXR26_13285	4	CXR26	2861242	CDS	CP025332	2862111	2861242	-3	-	870	Possible transcriptional regulatory protein	- none -
ND	fig|273384.21.peg.2537	CXR26_13325	4	CXR26	2870382	CDS	CP025332	2871488	2870382	-2	-	1107	Possible transposase	- none -
ND	fig|273384.16.peg.2079	BAURA63_02109	2	BAURA63	186555	CDS	FXYZ01000007	186555	187265	3	+	711	Predicted dinucleotide-binding enzymes	- none -
ND	fig|1703.46.peg.70	CIK79_RS00355	9	CIK79	2637295	CDS	NZ_NRGX01000001	85896	86870	3	+	975	Probable ABC transporter, ATP-binding component	- none -
ND	fig|273384.15.peg.4016	BAURA86_04073	6	BAURA86	932	CDS	FXZI01000059	932	1111	2	+	180	Probable cell wall-binding protein	- none -
ND	fig|273384.15.peg.4017	BAURA86_04074	6	BAURA86	1077	CDS	FXZI01000059	1077	1316	3	+	240	Probable cell wall-binding protein	- none -
ND	fig|273384.15.peg.580	BAURA86_00592	6	BAURA86	15427	CDS	FXZI01000002	16773	15427	-3	-	1347	Probable conserved integral membrane protein	- none -
ND	fig|273384.15.peg.584	BAURA86_00596	6	BAURA86	18807	CDS	FXZI01000002	18807	20033	3	+	1227	Probable conserved transmembrane protein	- none -
ND	fig|273384.15.peg.585	BAURA86_00597	6	BAURA86	20035	CDS	FXZI01000002	20035	20568	1	+	534	Probable conserved transmembrane protein	- none -
ND	fig|273384.16.peg.3647	BAURA63_03699	2	BAURA63	2100	CDS	FXYZ01000038	2100	4124	3	+	2025	Probable glycosyl transferase	- none -
ND	fig|1703.41.peg.2974	BLSMQ_RS15465	0	BLSMQ	3370824	CDS	NZ_CP017150	3370824	3372749	3	+	1926	Probable glycosyl transferase	- none -
ND	fig|273384.26.peg.3058	CXR23_16230	10	CXR23	3528750	CDS	CP025330	3528750	3530630	3	+	1881	Probable glycosyl transferase	- none -
ND	fig|1703.46.peg.49	CIK79_RS00245	9	CIK79	2611777	CDS	NZ_NRGX01000001	60378	61190	3	+	813	Probable methyltransferase	- none -
ND	fig|273384.26.peg.3350	CXR23_17740	10	CXR23	3845553	CDS	CP025330	3846872	3845553	-2	-	1320	Probable NreB protein	- none -
ND	fig|273384.21.peg.2569	CXR26_13495	4	CXR26	2911092	CDS	CP025332	2912933	2911092	-2	-	1842	Probable phiRv1 integrase	- none -
ND	fig|273384.15.peg.2463	BAURA86_02502	6	BAURA86	23665	CDS	FXZI01000009	23665	23835	1	+	171	PROBABLE TETRONASIN-TRANSPORT INTEGRAL MEMBRANE PROTEIN ABC TRANSPORTER	- none -
ND	fig|273384.15.peg.2040	BAURA86_02074	6	BAURA86	214259	CDS	FXZI01000006	215206	214259	-1	-	948	Probable transcriptional regulator, LysR family	- none -
ND	fig|273384.17.peg.3526	BAUR920_03576	8	BAUR920	1637	CDS	FXZG01000041	2944	1637	-1	-	1308	Probable transmembrane protein	- none -
ND	fig|273384.15.peg.467	BAURA86_00478	6	BAURA86	522661	CDS	FXZI01000001	523293	522661	-3	-	633	Probable transmembrane protein	- none -
ND	fig|1703.41.peg.1962	BLSMQ_RS10210	0	BLSMQ	2197470	CDS	NZ_CP017150	2198105	2197470	-2	-	636	Probable transmembrane protein	- none -
ND	fig|273384.26.peg.2799	CXR23_14880	10	CXR23	3215714	CDS	CP025330	3215714	3217132	2	+	1419	Probable transmembrane transport protein	- none -
ND	fig|273384.26.peg.388	CXR23_02060	10	CXR23	445411	CDS	CP025330	445411	445680	1	+	270	PROBABLE TRANSPOSASE	- none -
ND	fig|1703.41.peg.305	BLSMQ_RS01590	0	BLSMQ	349254	CDS	NZ_CP017150	350480	349254	-2	-	1227	Prolidase (EC 3.4.13.9)	- none -
ND	fig|1703.41.peg.307	BLSMQ_RS01600	0	BLSMQ	351497	CDS	NZ_CP017150	351497	352927	2	+	1431	Proline,Na+ Cotransport	- none -
ND	fig|273384.15.peg.474	BAURA86_00485	6	BAURA86	531779	CDS	FXZI01000001	531779	532744	2	+	966	Prophage Lp4 protein 7, DNA replication	- none -
ND	fig|273384.26.peg.2808	CXR23_14925	10	CXR23	3227268	CDS	CP025330	3227268	3228200	3	+	933	Prophage Lp4 protein 7, DNA replication	- none -
ND	fig|1703.46.peg.784	CIK79_RS04100	9	CIK79	3488959	CDS	NZ_NRGX01000001	937560	939425	3	+	1866	Protease II	- none -
ND	fig|273384.15.peg.4006	BAURA86_04063	6	BAURA86	991	CDS	FXZI01000054	1410	991	-3	-	420	Protease II (EC 3.4.21.83)	- none -
ND	fig|273384.26.peg.2777	CXR23_14760	10	CXR23	3186030	CDS	CP025330	3186030	3187886	3	+	1857	Protease II (EC 3.4.21.83)	- none -
ND	fig|1703.46.peg.50	CIK79_RS00250	9	CIK79	2612627	CDS	NZ_NRGX01000001	63432	61228	-3	-	2205	Protein export cytoplasm protein SecA ATPase RNA helicase (TC 3.A.5.1.1)	- none -
ND	fig|273384.16.peg.3795	BAURA63_03852	2	BAURA63	3	CDS	FXYZ01000080	230	3	-2	-	228	Protein of unknown function (DUF4231)	- none -
ND	fig|273384.26.peg.2427	CXR23_12925	10	CXR23	2783963	CDS	CP025330	2783963	2784391	2	+	429	Protein of unknown function DUF1524 RloF	- none -
ND	fig|273384.25.peg.2381	CXR27_12555	5	CXR27	2743264	CDS	CP025334	2745363	2743264	-3	-	2100	Protein of unknown function DUF1524 RloF	- none -
ND	fig|1703.41.peg.1324	BLSMQ_RS06870	0	BLSMQ	1492361	CDS	NZ_CP017150	1492732	1492361	-1	-	372	Protein of unknown function DUF1696	- none -
ND	fig|273384.26.peg.3352	CXR23_17750	10	CXR23	3847621	CDS	CP025330	3847621	3848211	1	+	591	Protein of unknown function DUF305	- none -
ND	fig|273384.20.peg.2693	CXR25_14095	7	CXR25	3015046	CDS	CP025333	3015046	3015378	1	+	333	Protein of unknown function DUF955	- none -
ND	fig|273384.15.peg.1069	BAURA86_01087	6	BAURA86	548619	CDS	FXZI01000002	548619	549896	3	+	1278	Proton/glutamate symport protein @ Sodium/glutamate symport protein	- none -
ND	fig|273384.16.peg.737	BAURA63_00748	2	BAURA63	259065	CDS	FXYZ01000002	259065	259673	3	+	609	puromycin N-acetyltransferase, putative	- none -
ND	fig|273384.16.peg.3619	BAURA63_03671	2	BAURA63	5399	CDS	FXYZ01000035	7126	5399	-1	-	1728	Putative ABC iron siderophore transporter, fused permease and ATPase domains	- none -
ND	fig|273384.19.peg.3143	BAUR9175_03188	1	BAUR9175	527	CDS	FXZB01000026	1333	527	-1	-	807	Putative ABC transporter ATP-binding protein	- none -
ND	fig|273384.15.peg.3701	BAURA86_03751	6	BAURA86	44124	CDS	FXZI01000021	44124	44906	3	+	783	Putative ABC transporter ATP-binding protein	- none -
ND	fig|273384.15.peg.639	BAURA86_00651	6	BAURA86	76123	CDS	FXZI01000002	76123	76959	1	+	837	Putative ABC transporter ATP-binding protein	- none -
ND	fig|273384.15.peg.1748	BAURA86_01776	6	BAURA86	141974	CDS	FXZI01000005	141974	142681	2	+	708	Putative ABC transporter ATP-binding protein	- none -
ND	fig|273384.15.peg.1832	BAURA86_01863	6	BAURA86	233591	CDS	FXZI01000005	233591	234532	2	+	942	Putative ABC transporter ATP-binding protein	- none -
ND	fig|273384.22.peg.3558	CXR24_18645	3	CXR24	4094251	CDS	CP025331	4095099	4094251	-3	-	849	Putative ABC transporter ATP-binding protein	- none -
ND	fig|273384.17.peg.3057	BAUR920_03103	8	BAUR920	1766	CDS	FXZG01000023	1766	3700	2	+	1935	Putative ABC transporter integral membrane protein	- none -
ND	fig|273384.15.peg.3702	BAURA86_03752	6	BAURA86	44903	CDS	FXZI01000021	44903	45715	2	+	813	Putative ABC transporter membrane protein	- none -
ND	fig|273384.15.peg.3997	BAURA86_04054	6	BAURA86	1020	CDS	FXZI01000048	1568	1020	-2	-	549	Putative ABC transporter permease	- none -
ND	fig|273384.15.peg.636	BAURA86_00648	6	BAURA86	72866	CDS	FXZI01000002	72866	73576	2	+	711	Putative ABC transporter permease	- none -
ND	fig|1703.41.peg.1979	BLSMQ_RS10315	0	BLSMQ	2218818	CDS	NZ_CP017150	2219372	2218818	-2	-	555	Putative acyltransferase	- none -
ND	fig|273384.15.peg.4071	BAURA86_04128	6	BAURA86	205	CDS	FXZI01000085	1056	205	-3	-	852	Putative aldose-1-epimerase	- none -
ND	fig|273384.16.peg.3099	BAURA63_03148	2	BAURA63	24990	CDS	FXYZ01000017	25955	24990	-2	-	966	Putative ATP/GTP-binding protein	- none -
ND	fig|1703.46.peg.28	CIK79_RS00140	9	CIK79	2592053	CDS	NZ_NRGX01000001	40654	41628	1	+	975	Putative ATP:scyllo-inosamine phosphotransferase	- none -
ND	fig|273384.15.peg.871	BAURA86_00886	6	BAURA86	321301	CDS	FXZI01000002	322650	321301	-3	-	1350	Putative ATP-binding protein	- none -
ND	fig|1703.46.peg.1638	CIK79_RS08560	9	CIK79	161705	CDS	NZ_NRGX01000001	1922419	1920920	-1	-	1500	Putative ATP-binding protein	- none -
ND	fig|1703.46.peg.32	CIK79_RS00160	9	CIK79	2596619	CDS	NZ_NRGX01000001	46821	45220	-3	-	1602	Putative ATP-binding protein	- none -
ND	fig|273384.25.peg.2798	CXR27_14755	5	CXR27	3223621	CDS	CP025334	3223621	3225000	1	+	1380	Putative ATP-binding protein	- none -
ND	fig|1703.46.peg.159	CIK79_RS00845	9	CIK79	2754932	CDS	NZ_NRGX01000001	205578	203533	-3	-	2046	Putative ATP-dependent protease	- none -
ND	fig|273384.16.peg.1276	BAURA63_01295	2	BAURA63	189463	CDS	FXYZ01000004	189463	193029	1	+	3567	Putative autotransporter protein	- none -
ND	fig|273384.15.peg.3880	BAURA86_03933	6	BAURA86	5731	CDS	FXZI01000027	6210	5731	-3	-	480	Putative bacteriophage T7-related protein	- none -
ND	fig|273384.16.peg.3525	BAURA63_03574	2	BAURA63	3377	CDS	FXYZ01000029	5869	3377	-1	-	2493	Putative cytoplasmic protein	- none -
ND	fig|273384.20.peg.2242	CXR25_11745	7	CXR25	2532283	CDS	CP025333	2534778	2532283	-3	-	2496	Putative cytoplasmic protein	- none -
ND	fig|273384.19.peg.2753	BAUR9175_02789	1	BAUR9175	98381	CDS	FXZB01000019	98381	100099	2	+	1719	Putative DNA-binding protein	- none -
ND	fig|273384.26.peg.2798	CXR23_14875	10	CXR23	3214728	CDS	CP025330	3215612	3214728	-2	-	885	Putative DNA-binding protein	- none -
ND	fig|273384.26.peg.2800	CXR23_14885	10	CXR23	3217607	CDS	CP025330	3218473	3217607	-1	-	867	Putative DNA-binding protein	- none -
ND	fig|273384.26.peg.2803	CXR23_14900	10	CXR23	3221032	CDS	CP025330	3221907	3221032	-3	-	876	Putative DNA-binding protein	- none -
ND	fig|273384.21.peg.452	CXR26_02370	4	CXR26	515208	CDS	CP025332	515208	516569	3	+	1362	Putative DNA-binding protein	- none -
ND	fig|273384.25.peg.2288	CXR27_12045	5	CXR27	2602495	CDS	CP025334	2602495	2603349	1	+	855	Putative DNA-binding protein	- none -
ND	fig|273384.25.peg.2776	CXR27_14635	5	CXR27	3200826	CDS	CP025334	3201389	3200826	-2	-	564	Putative Dyp-type peroxidase, associated with bacterial analog of Cox17 protein	- none -
ND	fig|273384.19.peg.3564	BAUR9175_03614	1	BAUR9175	14140	CDS	FXZB01000039	15366	14140	-3	-	1227	Putative esterase	- none -
ND	fig|273384.17.peg.2720	BAUR920_02762	8	BAUR920	1613	CDS	FXZG01000018	2341	1613	-1	-	729	Putative esterase	- none -
ND	fig|273384.17.peg.1414	BAUR920_01441	8	BAUR920	178896	CDS	FXZG01000006	180218	178896	-2	-	1323	Putative esterase	- none -
ND	fig|273384.26.peg.3353	CXR23_17755	10	CXR23	3848284	CDS	CP025330	3848284	3848907	1	+	624	Putative exported protein	- none -
ND	fig|273384.19.peg.3702	BAUR9175_03752	1	BAUR9175	10308	CDS	FXZB01000047	10308	11483	3	+	1176	Putative glycosyltransferase	- none -
ND	fig|273384.15.peg.581	BAURA86_00593	6	BAURA86	16799	CDS	FXZI01000002	16799	17479	2	+	681	Putative glycosyltransferase	- none -
ND	fig|273384.15.peg.2043	BAURA86_02077	6	BAURA86	218192	CDS	FXZI01000006	218192	219097	2	+	906	Putative hydrolase	- none -
ND	fig|273384.16.peg.3279	BAURA63_03328	2	BAURA63	9062	CDS	FXYZ01000021	9062	9898	2	+	837	Putative integral membrane protein	- none -
ND	fig|273384.16.peg.3106	BAURA63_03155	2	BAURA63	30959	CDS	FXYZ01000017	31840	30959	-1	-	882	Putative integral membrane protein	- none -
ND	fig|273384.16.peg.3107	BAURA63_03156	2	BAURA63	31837	CDS	FXYZ01000017	32673	31837	-3	-	837	Putative integral membrane protein	- none -
ND	fig|273384.16.peg.3119	BAURA63_03168	2	BAURA63	43788	CDS	FXYZ01000017	43788	45893	3	+	2106	Putative integral membrane protein	- none -
ND	fig|273384.15.peg.1749	BAURA86_01777	6	BAURA86	142678	CDS	FXZI01000005	142678	143406	1	+	729	Putative integral membrane protein	- none -
ND	fig|273384.15.peg.1750	BAURA86_01778	6	BAURA86	143403	CDS	FXZI01000005	143403	144161	3	+	759	Putative integral membrane protein	- none -
ND	fig|273384.15.peg.1756	BAURA86_01784	6	BAURA86	149920	CDS	FXZI01000005	150669	149920	-3	-	750	Putative integral membrane protein	- none -
ND	fig|1703.41.peg.2973	BLSMQ_RS15460	0	BLSMQ	3368786	CDS	NZ_CP017150	3368786	3370708	2	+	1923	Putative integral membrane protein	- none -
ND	fig|273384.26.peg.3054	CXR23_16210	10	CXR23	3520527	CDS	CP025330	3521777	3520527	-2	-	1251	Putative integral membrane protein	- none -
ND	fig|273384.26.peg.3055	CXR23_16215	10	CXR23	3521892	CDS	CP025330	3525461	3521892	-2	-	3570	Putative integral membrane protein	- none -
ND	fig|273384.15.peg.559	BAURA86_00571	6	BAURA86	622039	CDS	FXZI01000001	623538	622039	-3	-	1500	Putative integral membrane transport protein	- none -
ND	fig|273384.22.peg.516	CXR24_02710	3	CXR24	613237	CDS	CP025331	613237	615258	1	+	2022	Putative large ATP-binding protein	- none -
ND	fig|273384.16.peg.3101	BAURA63_03150	2	BAURA63	26512	CDS	FXYZ01000017	29334	26512	-3	-	2823	Putative large membrane protein	- none -
ND	fig|1703.41.peg.1354	BLSMQ_RS07025	0	BLSMQ	1525532	CDS	NZ_CP017150	1526437	1525532	-1	-	906	Putative LysR-family transcriptional regulator	- none -
ND	fig|273384.16.peg.3103	BAURA63_03152	2	BAURA63	29771	CDS	FXYZ01000017	30205	29771	-1	-	435	Putative membrane protein	- none -
ND	fig|273384.16.peg.3110	BAURA63_03159	2	BAURA63	35001	CDS	FXYZ01000017	35690	35001	-2	-	690	Putative membrane protein	- none -
ND	fig|273384.16.peg.3115	BAURA63_03164	2	BAURA63	39104	CDS	FXYZ01000017	39104	40246	2	+	1143	Putative membrane protein	- none -
ND	fig|1703.41.peg.53	BLSMQ_RS00285	0	BLSMQ	61984	CDS	NZ_CP017150	62436	61984	-3	-	453	Putative membrane protein	- none -
ND	fig|1703.41.peg.2670	BLSMQ_RS13890	0	BLSMQ	3029049	CDS	NZ_CP017150	3029049	3029843	3	+	795	Putative membrane protein	- none -
ND	fig|273384.26.peg.3365	CXR23_17820	10	CXR23	3859325	CDS	CP025330	3859325	3860299	2	+	975	Putative membrane protein	- none -
ND	fig|273384.16.peg.529	BAURA63_00536	2	BAURA63	26130	CDS	FXYZ01000002	27482	26130	-2	-	1353	Putative MFS Superfamily sugar transporter	- none -
ND	fig|273384.17.peg.865	BAUR920_00885	8	BAUR920	3526	CDS	FXZG01000004	3526	4950	1	+	1425	Putative minor silk ampullate protein	- none -
ND	fig|273384.19.peg.3562	BAUR9175_03612	1	BAUR9175	13038	CDS	FXZB01000039	13038	13805	3	+	768	Putative outer membrane or secreted lipoprotein	- none -
ND	fig|273384.15.peg.550	BAURA86_00562	6	BAURA86	614836	CDS	FXZI01000001	614836	615612	1	+	777	Putative oxidoreductase	- none -
ND	fig|273384.16.peg.3385	BAURA63_03434	2	BAURA63	34521	CDS	FXYZ01000023	35144	34521	-2	-	624	Putative peptidoglycan bound protein (LPXTG motif) Lmo1799 homolog	- none -
ND	fig|273384.19.peg.2163	BAUR9175_02193	1	BAUR9175	46856	CDS	FXZB01000014	46856	47764	2	+	909	Putative phosphatase	- none -
ND	fig|1703.46.peg.15	CIK79_RS00075	9	CIK79	2580971	CDS	NZ_NRGX01000001	29572	30750	1	+	1179	Putative reductoisomerase in siderophore biosynthesis gene cluster	- none -
ND	fig|273384.16.peg.3438	BAURA63_03487	2	BAURA63	2	CDS	FXYZ01000026	2545	2	-1	-	2544	Putative regulatory protein	- none -
ND	fig|273384.19.peg.3651	BAUR9175_03701	1	BAUR9175	704	CDS	FXZB01000044	2572	704	-1	-	1869	Putative restriction enzyme	- none -
ND	fig|273384.21.peg.397	CXR26_02075	4	CXR26	451115	CDS	CP025332	452026	451115	-1	-	912	Putative RNA polymerase sigma factor	- none -
ND	fig|273384.17.peg.280	BAUR920_00286	8	BAUR920	314829	CDS	FXZG01000001	315860	314829	-2	-	1032	Putative secreted protein	- none -
ND	fig|273384.16.peg.3130	BAURA63_03179	2	BAURA63	54431	CDS	FXYZ01000017	55309	54431	-1	-	879	Putative secreted protein	- none -
ND	fig|273384.15.peg.665	BAURA86_00677	6	BAURA86	100269	CDS	FXZI01000002	101090	100269	-2	-	822	Putative secreted protein	- none -
ND	fig|273384.26.peg.143	CXR23_00785	10	CXR23	164916	CDS	CP025330	165326	164916	-2	-	411	Putative sigma factor	- none -
ND	fig|273384.16.peg.3104	BAURA63_03153	2	BAURA63	30202	CDS	FXYZ01000017	30591	30202	-3	-	390	Putative TadE-like family protein	- none -
ND	fig|273384.15.peg.1619	BAURA86_01646	6	BAURA86	246587	CDS	FXZI01000004	246587	246877	2	+	291	Putative transcriptional regulator	- none -
ND	fig|1703.46.peg.1223	CIK79_RS06390	9	CIK79	3992842	CDS	NZ_NRGX01000001	1444130	1441443	-2	-	2688	Putative transcriptional regulator	- none -
ND	fig|273384.22.peg.3319	CXR24_17395	3	CXR24	3807801	CDS	CP025331	3810485	3807801	-2	-	2685	Putative transcriptional regulator	- none -
ND	fig|273384.26.peg.1334	CXR23_07125	10	CXR23	1514701	CDS	CP025330	1517355	1514701	-3	-	2655	Putative transcriptional regulatory protein	- none -
ND	fig|273384.19.peg.393	BAUR9175_00400	1	BAUR9175	87868	CDS	FXZB01000002	89091	87868	-3	-	1224	Putative transmembrane efflux protein	- none -
ND	fig|273384.26.peg.2804	CXR23_14905	10	CXR23	3222140	CDS	CP025330	3222140	3223351	2	+	1212	Putative transmembrane efflux protein	- none -
ND	fig|273384.26.peg.393	CXR23_02085	10	CXR23	450222	CDS	CP025330	451928	450222	-2	-	1707	Putative transport protein	- none -
ND	fig|273384.26.peg.395	CXR23_02095	10	CXR23	453634	CDS	CP025330	455250	453634	-3	-	1617	Putative transport protein	- none -
ND	fig|273384.16.peg.525	BAURA63_00532	2	BAURA63	20446	CDS	FXYZ01000002	21675	20446	-3	-	1230	Putative transporter	- none -
ND	fig|273384.17.peg.1830	BAUR920_01858	8	BAUR920	138721	CDS	FXZG01000009	139470	138721	-3	-	750	Putative transporter, trans-membrane domain bacteriocin immunity protein	- none -
ND	fig|273384.15.peg.3115	BAURA86_03159	6	BAURA86	67175	CDS	FXZI01000013	67175	67813	2	+	639	Putative tricarboxylic transport TctC	CBSS-49338.1.peg.459
ND	fig|1703.46.peg.779	CIK79_RS04075	9	CIK79	3482043	CDS	NZ_NRGX01000001	931213	930644	-1	-	570	Putative two-component system response regulator	- none -
ND	fig|273384.17.peg.1833	BAUR920_01861	8	BAUR920	141157	CDS	FXZG01000009	142392	141157	-3	-	1236	Putative two-component system sensor kinase	- none -
ND	fig|1703.46.peg.780	CIK79_RS04080	9	CIK79	3482678	CDS	NZ_NRGX01000001	932517	931279	-3	-	1239	Putative two-component system sensor kinase	- none -
ND	fig|273384.16.peg.3526	BAURA63_03575	2	BAURA63	5862	CDS	FXYZ01000029	7886	5862	-2	-	2025	Putative type II restriction enzyme methylase subunit	- none -
ND	fig|273384.16.peg.3706	BAURA63_03760	2	BAURA63	921	CDS	FXYZ01000047	1355	921	-2	-	435	Putative type IV peptidase	- none -
ND	fig|1703.46.peg.45	CIK79_RS00225	9	CIK79	2607343	CDS	NZ_NRGX01000001	56840	55944	-2	-	897	Putative uncharacterized protein ps609	- none -
ND	fig|273384.22.peg.2868	CXR24_15025	3	CXR24	3281993	CDS	CP025331	3282931	3281993	-1	-	939	Putative zinc-binding oxidoreductase	- none -
ND	fig|1703.41.peg.1577	BLSMQ_RS19500	0	BLSMQ	1767503	CDS	NZ_CP017150	1767503	1767982	2	+	480	PxORF73 peptide	- none -
ND	fig|273384.25.peg.1533	CXR27_08070	5	CXR27	1764796	CDS	CP025334	1764796	1766352	1	+	1557	Recombinase	- none -
ND	fig|273384.25.peg.2808	CXR27_14805	5	CXR27	3236824	CDS	CP025334	3238347	3236824	-3	-	1524	Recombinase	- none -
ND	fig|273384.20.peg.210	CXR25_01110	7	CXR25	228565	CDS	CP025333	228565	229083	1	+	519	Regulator of polyketide synthase expression	- none -
ND	fig|273384.17.peg.2563	BAUR920_02604	8	BAUR920	23147	CDS	FXZG01000016	23147	24049	2	+	903	Regulatory protein, LuxR	- none -
ND	fig|273384.15.peg.3856	BAURA86_03909	6	BAURA86	28802	CDS	FXZI01000025	29470	28802	-1	-	669	Regulatory protein, MerR	- none -
ND	fig|273384.20.peg.217	CXR25_01145	7	CXR25	236813	CDS	CP025333	236813	237163	2	+	351	Regulatory protein, MerR	- none -
ND	fig|273384.15.peg.4032	BAURA86_04089	6	BAURA86	331	CDS	FXZI01000067	331	1269	1	+	939	Relaxase TrwC / Conjugal transfer protein TraA / DNA primase (EC 2.7.7.-), conjugative	- none -
ND	fig|273384.19.peg.2417	BAUR9175_02448	1	BAUR9175	89888	CDS	FXZB01000016	89888	90964	2	+	1077	Replication initiator protein	- none -
ND	fig|273384.17.peg.3019	BAUR920_03063	8	BAUR920	25171	CDS	FXZG01000022	26592	25171	-3	-	1422	Replication protein	- none -
ND	fig|273384.15.peg.3935	BAURA86_03988	6	BAURA86	3076	CDS	FXZI01000030	3615	3076	-3	-	540	Replication region DNA-binding N-term	- none -
ND	fig|273384.15.peg.1374	BAURA86_01395	6	BAURA86	341673	CDS	FXZI01000003	342218	341673	-2	-	546	Replication region DNA-binding N-term	- none -
ND	fig|273384.15.peg.4056	BAURA86_04113	6	BAURA86	242	CDS	FXZI01000078	1045	242	-1	-	804	Response regulator receiver:Transcriptional regulatory protein, C- terminal	- none -
ND	fig|273384.21.peg.2960	CXR26_15525	4	CXR26	3357632	CDS	CP025332	3358267	3357632	-1	-	636	RhtB family transporter	- none -
ND	fig|273384.26.peg.1458	CXR23_07775	10	CXR23	1660522	CDS	CP025330	1660522	1661250	1	+	729	RloF	- none -
ND	fig|273384.15.peg.3862	BAURA86_03915	6	BAURA86	2466	CDS	FXZI01000026	2466	3461	3	+	996	Rossmann fold nucleotide-binding protein Smf possibly involved in DNA uptake	CBSS-272943.3.peg.1367; <br>Conserved gene cluster associated with Met-tRNA formyltransferase
ND	fig|273384.15.peg.1744	BAURA86_01772	6	BAURA86	135501	CDS	FXZI01000005	135501	136505	3	+	1005	Rossmann fold nucleotide-binding protein Smf possibly involved in DNA uptake	CBSS-272943.3.peg.1367; <br>Conserved gene cluster associated with Met-tRNA formyltransferase
ND	fig|273384.15.peg.906	BAURA86_00921	6	BAURA86	355115	CDS	FXZI01000002	356116	355115	-1	-	1002	Rossmann fold nucleotide-binding protein Smf possibly involved in DNA uptake	CBSS-272943.3.peg.1367; <br>Conserved gene cluster associated with Met-tRNA formyltransferase
ND	fig|1703.46.peg.1696	CIK79_RS08870	9	CIK79	219047	CDS	NZ_NRGX01000001	1979272	1978262	-1	-	1011	Rossmann fold nucleotide-binding protein Smf possibly involved in DNA uptake	CBSS-272943.3.peg.1367; <br>Conserved gene cluster associated with Met-tRNA formyltransferase
ND	fig|273384.26.peg.3373	CXR23_17860	10	CXR23	3869640	CDS	CP025330	3870647	3869640	-2	-	1008	Rossmann fold nucleotide-binding protein Smf possibly involved in DNA uptake	CBSS-272943.3.peg.1367; <br>Conserved gene cluster associated with Met-tRNA formyltransferase
ND	fig|273384.25.peg.2802	CXR27_14775	5	CXR27	3228907	CDS	CP025334	3228907	3229941	1	+	1035	Rossmann fold nucleotide-binding protein Smf possibly involved in DNA uptake	CBSS-272943.3.peg.1367; <br>Conserved gene cluster associated with Met-tRNA formyltransferase
ND	fig|273384.15.peg.2452	BAURA86_02491	6	BAURA86	11563	CDS	FXZI01000009	11563	11763	1	+	201	Rv3128c-like protein	- none -
ND	fig|273384.15.peg.1364	BAURA86_01385	6	BAURA86	329945	CDS	FXZI01000003	331162	329945	-1	-	1218	Rv3128c-like protein	- none -
ND	fig|273384.22.peg.514	CXR24_02700	3	CXR24	611109	CDS	CP025331	612299	611109	-2	-	1191	Rv3128c-like protein	- none -
ND	fig|273384.21.peg.3037	CXR26_15930	4	CXR26	3438914	CDS	CP025332	3439729	3438914	-1	-	816	SAM-dependent methyltransferase DSY4148 (UbiE paralog)	- none -
ND	fig|273384.26.peg.3378	CXR23_17890	10	CXR23	3874734	CDS	CP025330	3874734	3876719	3	+	1986	SCE2.16, unknown, len: 706aa	- none -
ND	fig|273384.22.peg.517	CXR24_02715	3	CXR24	615355	CDS	CP025331	615355	617496	1	+	2142	SCE2.16, unknown, len: 706aa	- none -
ND	fig|273384.15.peg.1369	BAURA86_01390	6	BAURA86	338541	CDS	FXZI01000003	338906	338541	-2	-	366	SCP1.182, unknown, len: 251aa	- none -
ND	fig|273384.15.peg.466	BAURA86_00477	6	BAURA86	521782	CDS	FXZI01000001	521782	522657	1	+	876	Secreted peptidase	- none -
ND	fig|273384.26.peg.3345	CXR23_17715	10	CXR23	3840661	CDS	CP025330	3841662	3840661	-3	-	1002	Secreted protein	- none -
ND	fig|273384.25.peg.380	CXR27_01975	5	CXR27	430422	CDS	CP025334	431363	430422	-2	-	942	Short-chain dehydrogenase/reductase SDR	Transcription repair cluster
ND	fig|1703.46.peg.14	CIK79_RS00070	9	CIK79	2575557	CDS	NZ_NRGX01000001	24158	29644	2	+	5487	Siderophore biosynthesis non-ribosomal peptide synthetase modules	- none -
ND	fig|273384.26.peg.2837	CXR23_15075	10	CXR23	3259913	CDS	CP025330	3259913	3260377	2	+	465	Single-strand binding protein/Primosomal replication protein n	- none -
ND	fig|273384.26.peg.3318	CXR23_17575	10	CXR23	3812115	CDS	CP025330	3812576	3812115	-2	-	462	Single-strand binding protein/Primosomal replication protein n	- none -
ND	fig|273384.25.peg.2806	CXR27_14795	5	CXR27	3235627	CDS	CP025334	3235627	3236091	1	+	465	Single-strand binding protein/Primosomal replication protein n	- none -
ND	fig|1703.46.peg.1	CIK79_RS00005	9	CIK79	2551400	CDS	NZ_NRGX01000001	628	1	-1	-	628	Single-stranded DNA-binding protein	- none -
ND	fig|273384.19.peg.2935	BAUR9175_02975	1	BAUR9175	27646	CDS	FXZB01000022	28224	27646	-3	-	579	Site-specific recombinase	- none -
ND	fig|1703.46.peg.1627	CIK79_RS08505	9	CIK79	150452	CDS	NZ_NRGX01000001	1911613	1909667	-1	-	1947	Site-specific recombinase for integration and excision	- none -
ND	fig|273384.15.peg.1611	BAURA86_01638	6	BAURA86	235949	CDS	FXZI01000004	235949	237502	2	+	1554	Site-specific recombinases, DNA invertase Pin homologs	- none -
ND	fig|1703.46.peg.2017	CIK79_RS10505	9	CIK79	591071	CDS	NZ_NRGX01000001	2350286	2352319	2	+	2034	Sll0625 protein	- none -
ND	fig|1703.41.peg.2661	BLSMQ_RS13840	0	BLSMQ	3013541	CDS	NZ_CP017150	3017242	3013541	-1	-	3702	Snf2 family protein	- none -
ND	fig|273384.17.peg.3334	BAUR920_03381	8	BAUR920	16658	CDS	FXZG01000030	16658	16852	2	+	195	Sodium/proline symporter	- none -
ND	fig|273384.17.peg.1613	BAUR920_01641	8	BAUR920	27850	CDS	FXZG01000008	27850	29355	1	+	1506	Sodium-solute symporter, putative	- none -
ND	fig|273384.19.peg.3558	BAUR9175_03608	1	BAUR9175	8477	CDS	FXZB01000039	9850	8477	-1	-	1374	Succinate-semialdehyde dehydrogenase [NAD] (EC 1.2.1.24); Succinate-semialdehyde dehydrogenase [NAD(P)+] (EC 1.2.1.16)	- none -
ND	fig|273384.15.peg.2039	BAURA86_02073	6	BAURA86	213306	CDS	FXZI01000006	214262	213306	-2	-	957	Sulfatase modifying factor 1 precursor (C-alpha-formyglycine- generating enzyme 1)	Sulfatases and sulfatase modifying factor 1
ND	fig|1703.41.peg.271	BLSMQ_RS01420	0	BLSMQ	302166	CDS	NZ_CP017150	302166	302741	3	+	576	Superfamily II DNA and RNA helicase	- none -
ND	fig|1703.41.peg.274	BLSMQ_RS01435	0	BLSMQ	305323	CDS	NZ_CP017150	305323	307836	1	+	2514	Superfamily II DNA and RNA helicase	- none -
ND	fig|273384.15.peg.888	BAURA86_00903	6	BAURA86	337639	CDS	FXZI01000002	337639	338199	1	+	561	SWF/SNF family helicase	- none -
ND	fig|273384.22.peg.492	CXR24_02585	3	CXR24	580445	CDS	CP025331	581461	580445	-1	-	1017	Teichuronopeptide biosynthesis	- none -
ND	fig|1703.46.peg.16	CIK79_RS00080	9	CIK79	2582203	CDS	NZ_NRGX01000001	30804	31559	3	+	756	Thioesterase in siderophore biosynthesis gene cluster	- none -
ND	fig|1703.41.peg.1969	BLSMQ_RS10260	0	BLSMQ	2205933	CDS	NZ_CP017150	2206385	2205933	-2	-	453	Thiosulfate sulfurtransferase, rhodanese (EC 2.8.1.1)	- none -
ND	fig|273384.16.peg.3672	BAURA63_03726	2	BAURA63	3	CDS	FXYZ01000041	3	254	3	+	252	Toxin 35	- none -
ND	fig|273384.26.peg.527	CXR23_02785	10	CXR23	619455	CDS	CP025330	619745	619455	-2	-	291	Transcriptional regulator	- none -
ND	fig|273384.25.peg.2763	CXR27_14570	5	CXR27	3187348	CDS	CP025334	3187348	3188451	1	+	1104	Transcriptional regulator	- none -
ND	fig|273384.19.peg.3524	BAUR9175_03574	1	BAUR9175	21444	CDS	FXZB01000037	21444	22361	3	+	918	Transcriptional regulator, AraC family	- none -
ND	fig|273384.17.peg.1152	BAUR920_01177	8	BAUR920	91159	CDS	FXZG01000005	91159	92385	1	+	1227	Transcriptional regulator, AraC family	- none -
ND	fig|273384.17.peg.1415	BAUR920_01442	8	BAUR920	180222	CDS	FXZG01000006	181067	180222	-2	-	846	Transcriptional regulator, AraC family	- none -
ND	fig|273384.15.peg.3866	BAURA86_03919	6	BAURA86	9751	CDS	FXZI01000026	11346	9751	-3	-	1596	Transcriptional regulator, AraC family	- none -
ND	fig|273384.15.peg.3874	BAURA86_03927	6	BAURA86	21009	CDS	FXZI01000026	21009	21983	3	+	975	Transcriptional regulator, AraC family	- none -
ND	fig|273384.15.peg.3560	BAURA86_03609	6	BAURA86	35494	CDS	FXZI01000018	35494	36066	1	+	573	Transcriptional regulator, AraC family	- none -
ND	fig|273384.15.peg.668	BAURA86_00680	6	BAURA86	103751	CDS	FXZI01000002	103751	104767	2	+	1017	Transcriptional regulator, AraC family	- none -
ND	fig|273384.15.peg.1751	BAURA86_01779	6	BAURA86	144264	CDS	FXZI01000005	144264	145211	3	+	948	Transcriptional regulator, AraC family	- none -
ND	fig|273384.15.peg.883	BAURA86_00898	6	BAURA86	331546	CDS	FXZI01000002	332460	331546	-3	-	915	Transcriptional regulator, AraC family	- none -
ND	fig|273384.15.peg.473	BAURA86_00484	6	BAURA86	530628	CDS	FXZI01000001	530628	531497	3	+	870	Transcriptional regulator, AraC family	- none -
ND	fig|1703.46.peg.57	CIK79_RS00285	9	CIK79	2622055	CDS	NZ_NRGX01000001	71771	70656	-2	-	1116	Transcriptional regulator, AraC family	- none -
ND	fig|273384.26.peg.2807	CXR23_14920	10	CXR23	3225984	CDS	CP025330	3225984	3226910	3	+	927	Transcriptional regulator, AraC family	- none -
ND	fig|273384.21.peg.3151	CXR26_16525	4	CXR26	3569976	CDS	CP025332	3569976	3570959	3	+	984	Transcriptional regulator, AraC family	- none -
ND	fig|273384.25.peg.2787	CXR27_14700	5	CXR27	3214303	CDS	CP025334	3214303	3215325	1	+	1023	Transcriptional regulator, AraC family	- none -
ND	fig|273384.17.peg.3016	BAUR920_03060	8	BAUR920	22431	CDS	FXZG01000022	22431	22748	3	+	318	Transcriptional regulator, ArsR family	- none -
ND	fig|273384.16.peg.3462	BAURA63_03511	2	BAURA63	17478	CDS	FXYZ01000026	17843	17478	-2	-	366	Transcriptional regulator, ArsR family	- none -
ND	fig|273384.15.peg.1829	BAURA86_01860	6	BAURA86	232320	CDS	FXZI01000005	232320	232700	3	+	381	Transcriptional regulator, ArsR family	CBSS-1085.1.peg.1363
ND	fig|273384.17.peg.3207	BAUR920_03254	8	BAUR920	20637	CDS	FXZG01000026	21542	20637	-2	-	906	Transcriptional regulator, AsnC family	- none -
ND	fig|273384.26.peg.2941	CXR23_15625	10	CXR23	3383906	CDS	CP025330	3384853	3383906	-1	-	948	Transcriptional regulator, AsnC family	- none -
ND	fig|273384.15.peg.3598	BAURA86_03647	6	BAURA86	12099	CDS	FXZI01000019	13784	12099	-2	-	1686	Transcriptional regulator, CdaR	- none -
ND	fig|273384.17.peg.1657	BAUR920_01685	8	BAUR920	91594	CDS	FXZG01000008	91594	92439	1	+	846	Transcriptional regulator, Cro/CI family	- none -
ND	fig|1703.46.peg.3022	CIK79_RS15775	9	CIK79	1732380	CDS	NZ_NRGX01000001	3491807	3491595	-2	-	213	Transcriptional regulator, Cro/CI family	- none -
ND	fig|273384.17.peg.2721	BAUR920_02763	8	BAUR920	2415	CDS	FXZG01000018	2415	3113	3	+	699	Transcriptional regulator, DeoR family	- none -
ND	fig|273384.15.peg.3879	BAURA86_03932	6	BAURA86	4660	CDS	FXZI01000027	4660	5646	1	+	987	Transcriptional regulator, DeoR family	- none -
ND	fig|273384.19.peg.388	BAUR9175_00395	1	BAUR9175	81115	CDS	FXZB01000002	81115	81798	1	+	684	Transcriptional regulator, GntR family	- none -
ND	fig|273384.17.peg.3320	BAUR920_03367	8	BAUR920	3514	CDS	FXZG01000030	4227	3514	-3	-	714	Transcriptional regulator, GntR family	- none -
ND	fig|273384.17.peg.3344	BAUR920_03391	8	BAUR920	25057	CDS	FXZG01000030	25057	25704	1	+	648	Transcriptional regulator, GntR family	- none -
ND	fig|273384.15.peg.2615	BAURA86_02655	6	BAURA86	1601	CDS	FXZI01000010	2365	1601	-1	-	765	Transcriptional regulator, GntR family	- none -
ND	fig|273384.15.peg.3601	BAURA86_03650	6	BAURA86	17277	CDS	FXZI01000019	17948	17277	-2	-	672	Transcriptional regulator, GntR family	- none -
ND	fig|273384.15.peg.634	BAURA86_00646	6	BAURA86	71509	CDS	FXZI01000002	71509	71955	1	+	447	Transcriptional regulator, GntR family	- none -
ND	fig|1703.41.peg.2949	BLSMQ_RS15340	0	BLSMQ	3344937	CDS	NZ_CP017150	3344937	3345731	3	+	795	Transcriptional regulator, GntR family	- none -
ND	fig|273384.22.peg.3535	CXR24_18500	3	CXR24	4060639	CDS	CP025331	4061295	4060639	-3	-	657	Transcriptional regulator, GntR family	- none -
ND	fig|273384.17.peg.3325	BAUR920_03372	8	BAUR920	8302	CDS	FXZG01000030	9090	8302	-3	-	789	Transcriptional regulator, IclR family	- none -
ND	fig|273384.22.peg.3554	CXR24_18600	3	CXR24	4086546	CDS	CP025331	4087259	4086546	-2	-	714	Transcriptional regulator, IclR family	- none -
ND	fig|273384.25.peg.374	CXR27_01945	5	CXR27	420657	CDS	CP025334	420657	423377	3	+	2721	Transcriptional regulator, LuxR family, putative	- none -
ND	fig|1703.46.peg.2803	CIK79_RS14650	9	CIK79	1467607	CDS	NZ_NRGX01000001	3226822	3227709	1	+	888	Transcriptional regulator, LysR family	- none -
ND	fig|273384.22.peg.3561	CXR24_18660	3	CXR24	4097169	CDS	CP025331	4097169	4098077	3	+	909	Transcriptional regulator, LysR family	- none -
ND	fig|273384.17.peg.1154	BAUR920_01179	8	BAUR920	93474	CDS	FXZG01000005	93474	94034	3	+	561	Transcriptional regulator, MarR family	- none -
ND	fig|273384.15.peg.1759	BAURA86_01787	6	BAURA86	151768	CDS	FXZI01000005	151768	152217	1	+	450	Transcriptional regulator, MarR family	- none -
ND	fig|273384.15.peg.886	BAURA86_00901	6	BAURA86	335199	CDS	FXZI01000002	335681	335199	-2	-	483	Transcriptional regulator, MarR family	- none -
ND	fig|1703.46.peg.1636	CIK79_RS08550	9	CIK79	159488	CDS	NZ_NRGX01000001	1919230	1918703	-1	-	528	Transcriptional regulator, MarR family	- none -
ND	fig|273384.26.peg.2817	CXR23_14975	10	CXR23	3237322	CDS	CP025330	3237807	3237322	-3	-	486	Transcriptional regulator, MarR family	- none -
ND	fig|273384.25.peg.2772	CXR27_14615	5	CXR27	3198008	CDS	CP025334	3198008	3198385	2	+	378	Transcriptional regulator, MecI family	- none -
ND	fig|273384.25.peg.2777	CXR27_14640	5	CXR27	3201568	CDS	CP025334	3201951	3201568	-3	-	384	Transcriptional regulator, MecI family	- none -
ND	fig|273384.19.peg.2742	BAUR9175_02778	1	BAUR9175	84081	CDS	FXZB01000019	84443	84081	-2	-	363	Transcriptional regulator, MerR family	- none -
ND	fig|273384.15.peg.891	BAURA86_00906	6	BAURA86	339480	CDS	FXZI01000002	339842	339480	-2	-	363	Transcriptional regulator, PadR family	CBSS-1352.1.peg.856
ND	fig|273384.16.peg.2536	BAURA63_02574	2	BAURA63	14881	CDS	FXYZ01000011	14881	15729	1	+	849	Transcriptional regulator, RpiR family	- none -
ND	fig|1703.41.peg.306	BLSMQ_RS01595	0	BLSMQ	350551	CDS	NZ_CP017150	350551	351408	1	+	858	Transcriptional regulator, RpiR family	- none -
ND	fig|273384.17.peg.3373	BAUR920_03421	8	BAUR920	116	CDS	FXZG01000032	520	116	-1	-	405	Transcriptional regulator, TetR family	- none -
ND	fig|273384.17.peg.388	BAUR920_00398	8	BAUR920	107434	CDS	FXZG01000002	107434	108072	1	+	639	Transcriptional regulator, TetR family	- none -
ND	fig|273384.16.peg.3618	BAURA63_03670	2	BAURA63	4501	CDS	FXYZ01000035	4501	5145	1	+	645	Transcriptional regulator, TetR family	- none -
ND	fig|273384.16.peg.3624	BAURA63_03676	2	BAURA63	11130	CDS	FXYZ01000035	11819	11130	-2	-	690	Transcriptional regulator, TetR family	- none -
ND	fig|273384.16.peg.527	BAURA63_00534	2	BAURA63	22787	CDS	FXYZ01000002	22787	23380	2	+	594	Transcriptional regulator, TetR family	- none -
ND	fig|273384.15.peg.1383	BAURA86_01404	6	BAURA86	4217	CDS	FXZI01000004	4217	4819	2	+	603	Transcriptional regulator, TetR family	- none -
ND	fig|273384.15.peg.1384	BAURA86_01405	6	BAURA86	4971	CDS	FXZI01000004	5729	4971	-2	-	759	Transcriptional regulator, TetR family	- none -
ND	fig|273384.15.peg.1389	BAURA86_01410	6	BAURA86	10587	CDS	FXZI01000004	10587	11156	3	+	570	Transcriptional regulator, TetR family	- none -
ND	fig|273384.15.peg.3700	BAURA86_03750	6	BAURA86	43292	CDS	FXZI01000021	44062	43292	-1	-	771	Transcriptional regulator, TetR family	- none -
ND	fig|273384.15.peg.644	BAURA86_00656	6	BAURA86	82202	CDS	FXZI01000002	82202	82816	2	+	615	Transcriptional regulator, TetR family	- none -
ND	fig|273384.15.peg.469	BAURA86_00480	6	BAURA86	524115	CDS	FXZI01000001	524687	524115	-2	-	573	Transcriptional regulator, TetR family	- none -
ND	fig|273384.15.peg.471	BAURA86_00482	6	BAURA86	526362	CDS	FXZI01000001	527003	526362	-2	-	642	Transcriptional regulator, TetR family	- none -
ND	fig|273384.15.peg.549	BAURA86_00561	6	BAURA86	614243	CDS	FXZI01000001	614243	614839	2	+	597	Transcriptional regulator, TetR family	- none -
ND	fig|1703.41.peg.54	BLSMQ_RS00290	0	BLSMQ	62519	CDS	NZ_CP017150	62519	63109	2	+	591	Transcriptional regulator, TetR family	- none -
ND	fig|1703.46.peg.1688	CIK79_RS08830	9	CIK79	210305	CDS	NZ_NRGX01000001	1969520	1970245	2	+	726	Transcriptional regulator, TetR family	- none -
ND	fig|1703.46.peg.1694	CIK79_RS08860	9	CIK79	217134	CDS	NZ_NRGX01000001	1976349	1977080	3	+	732	Transcriptional regulator, TetR family	- none -
ND	fig|1703.46.peg.51	CIK79_RS00255	9	CIK79	2615203	CDS	NZ_NRGX01000001	63804	64439	3	+	636	Transcriptional regulator, TetR family	- none -
ND	fig|1703.46.peg.61	CIK79_RS00305	9	CIK79	2626360	CDS	NZ_NRGX01000001	74961	75560	3	+	600	Transcriptional regulator, TetR family	- none -
ND	fig|273384.26.peg.2779	CXR23_14770	10	CXR23	3188871	CDS	CP025330	3188871	3189590	3	+	720	Transcriptional regulator, TetR family	- none -
ND	fig|273384.26.peg.3363	CXR23_17810	10	CXR23	3858039	CDS	CP025330	3858635	3858039	-2	-	597	Transcriptional regulator, TetR family	- none -
ND	fig|273384.22.peg.1541	CXR24_08085	3	CXR24	1751686	CDS	CP025331	1752594	1751686	-3	-	909	Transcriptional regulator, TetR family	- none -
ND	fig|1703.41.peg.2680	BLSMQ_RS13940	0	BLSMQ	3044110	CDS	NZ_CP017150	3044110	3044724	1	+	615	Transcriptional regulator, XRE family	- none -
ND	fig|273384.16.peg.3609	BAURA63_03661	2	BAURA63	7084	CDS	FXYZ01000034	7500	7084	-3	-	417	Transcriptional regulators	- none -
ND	fig|273384.19.peg.3037	BAUR9175_03082	1	BAUR9175	58730	CDS	FXZB01000023	60265	58730	-1	-	1536	Transfer protein traSA	- none -
ND	fig|273384.19.peg.2421	BAUR9175_02452	1	BAUR9175	92220	CDS	FXZB01000016	92220	93710	3	+	1491	Transfer protein traSA	- none -
ND	fig|273384.21.peg.2181	CXR26_11470	4	CXR26	2462578	CDS	CP025332	2462578	2464884	1	+	2307	Translation-disabling ACNase RloC	- none -
ND	fig|273384.15.peg.3878	BAURA86_03931	6	BAURA86	3108	CDS	FXZI01000027	4586	3108	-2	-	1479	Transmembrane efflux protein	- none -
ND	fig|273384.15.peg.885	BAURA86_00900	6	BAURA86	333715	CDS	FXZI01000002	333715	335172	1	+	1458	Transmembrane efflux protein	- none -
ND	fig|273384.17.peg.3540	BAUR920_03591	8	BAUR920	2192	CDS	FXZG01000043	2192	2449	2	+	258	Transposase	- none -
ND	fig|273384.21.peg.2541	CXR26_13345	4	CXR26	2875479	CDS	CP025332	2876258	2875479	-2	-	780	Transposase A from transposon Tn554	- none -
ND	fig|273384.21.peg.1633	CXR26_08600	4	CXR26	1836472	CDS	CP025332	1836472	1836687	1	+	216	Transposase for IS3510b	- none -
ND	fig|273384.17.peg.3528	BAUR920_03578	8	BAUR920	5386	CDS	FXZG01000041	5386	5976	1	+	591	Transposon Tn21 resolvase	- none -
ND	fig|273384.15.peg.637	BAURA86_00649	6	BAURA86	73695	CDS	FXZI01000002	73695	75218	3	+	1524	Two-component system sensor kinase	- none -
ND	fig|273384.15.peg.1747	BAURA86_01775	6	BAURA86	140975	CDS	FXZI01000005	141841	140975	-1	-	867	Two-component system sensor kinase	- none -
ND	fig|273384.26.peg.3361	CXR23_17800	10	CXR23	3855633	CDS	CP025330	3856922	3855633	-2	-	1290	Two-component system sensor kinase	- none -
ND	fig|1703.46.peg.161	CIK79_RS00855	9	CIK79	2759316	CDS	NZ_NRGX01000001	211129	207917	-1	-	3213	Type II restriction enzyme, methylase subunits	- none -
ND	fig|273384.17.peg.1143	BAUR920_01168	8	BAUR920	81957	CDS	FXZG01000005	82649	81957	-2	-	693	Type IV pilus biogenesis protein PilO	- none -
ND	fig|273384.16.peg.407	BAURA63_00413	2	BAURA63	456415	CDS	FXYZ01000001	457278	456415	-3	-	864	Type IV pilus biogenesis protein PilO	- none -
ND	fig|273384.22.peg.3316	CXR24_17380	3	CXR24	3804050	CDS	CP025331	3805702	3804050	-1	-	1653	Tyrosine-protein kinase EpsD (EC 2.7.10.2)	- none -
ND	fig|273384.15.peg.4044	BAURA86_04101	6	BAURA86	1	CDS	FXZI01000073	174	1	-3	-	174	Ubiquinone biosynthesis protein	- none -
ND	fig|273384.25.peg.2774	CXR27_14625	5	CXR27	3199292	CDS	CP025334	3200602	3199292	-1	-	1311	UDP-glucose dehydrogenase (EC 1.1.1.22)	- none -
ND	fig|273384.19.peg.3507	BAUR9175_03557	1	BAUR9175	177	CDS	FXZB01000037	177	1286	3	+	1110	UL36 very large tegument protein	- none -
ND	fig|273384.19.peg.3652	BAUR9175_03702	1	BAUR9175	2573	CDS	FXZB01000044	3265	2573	-1	-	693	Ulcer associated adenine specific DNA methyltransferase	- none -
ND	fig|273384.16.peg.3280	BAURA63_03329	2	BAURA63	10104	CDS	FXYZ01000021	10104	11609	3	+	1506	Uncharacterized iron-regulated membrane protein; Iron-uptake factor PiuB	- none -
ND	fig|273384.26.peg.1339	CXR23_07150	10	CXR23	1522639	CDS	CP025330	1522639	1524192	1	+	1554	Undecaprenyl-phosphate galactosephosphotransferase (EC 2.7.8.6)	- none -
ND	fig|273384.19.peg.3526	BAUR9175_03576	1	BAUR9175	23326	CDS	FXZB01000037	23326	23688	1	+	363	Unknown	- none -
ND	fig|273384.19.peg.2910	BAUR9175_02949	1	BAUR9175	78950	CDS	FXZB01000021	78950	80554	2	+	1605	Unknown	- none -
ND	fig|273384.17.peg.1656	BAUR920_01684	8	BAUR920	90591	CDS	FXZG01000008	90591	91445	3	+	855	Unknown	- none -
ND	fig|273384.26.peg.2767	CXR23_14710	10	CXR23	3167431	CDS	CP025330	3167431	3168105	1	+	675	VrlR-like protein	- none -
ND	fig|273384.19.peg.3426	BAUR9175_03471	1	BAUR9175	962	CDS	FXZB01000034	1573	962	-1	-	612	XcbB	- none -
ND	fig|273384.15.peg.3622	BAURA86_03671	6	BAURA86	54160	CDS	FXZI01000019	54160	55245	1	+	1086	XcbB	- none -
ND	fig|1703.41.peg.2351	BLSMQ_RS12245	0	BLSMQ	2653884	CDS	NZ_CP017150	2655074	2653884	-2	-	1191	YeeC-like protein	CBSS-316273.3.peg.2378
Nitrogen Metabolism	fig|273384.22.peg.2813	CXR24_14750	3	CXR24	3219212	CDS	CP025331	3219607	3219212	-1	-	396	Assimilatory nitrate reductase large subunit (EC:1.7.99.4)	Nitrate and nitrite ammonification
Nitrogen Metabolism	fig|273384.26.peg.3482	CXR23_18460	10	CXR23	4009815	CDS	CP025330	4009815	4010996	3	+	1182	Nitrate/nitrite transporter	Nitrate and nitrite ammonification
Nitrogen Metabolism	fig|273384.26.peg.3484	CXR23_18470	10	CXR23	4014849	CDS	CP025330	4014849	4016504	3	+	1656	Respiratory nitrate reductase beta chain (EC 1.7.99.4)	Denitrifying reductase gene clusters; <br>Nitrate and nitrite ammonification
Nitrogen Metabolism	fig|273384.26.peg.3485	CXR23_18475	10	CXR23	4016506	CDS	CP025330	4016506	4017375	1	+	870	Respiratory nitrate reductase delta chain (EC 1.7.99.4)	Denitrifying reductase gene clusters; <br>Nitrate and nitrite ammonification
Nitrogen Metabolism	fig|273384.26.peg.3486	CXR23_18480	10	CXR23	4017372	CDS	CP025330	4017372	4018103	3	+	732	Respiratory nitrate reductase gamma chain (EC 1.7.99.4)	Denitrifying reductase gene clusters; <br>Nitrate and nitrite ammonification
Nucleosides and Nucleotides	fig|273384.26.peg.994	CXR23_05270	10	CXR23	1156170	CDS	CP025330	1156170	1157114	3	+	945	2,3;-cyclic-nucleotide 2&#39;-phosphodiesterase (EC 3.1.4.16)	Purine conversions; <br>pyrimidine conversions
Nucleosides and Nucleotides	fig|273384.16.peg.1112	BAURA63_01128	2	BAURA63	6794	CDS	FXYZ01000004	9271	6794	-1	-	2478	5-nucleotidase (EC 3.1.3.5)	Purine conversions; <br>pyrimidine conversions
Nucleosides and Nucleotides	fig|273384.19.peg.122	BAUR9175_00124	1	BAUR9175	136967	CDS	FXZB01000001	136967	137407	2	+	441	ADP-ribose pyrophosphatase (EC 3.6.1.13)	CBSS-216591.1.peg.168; <br>NAD and NADP cofactor biosynthesis global; <br>Nudix proteins (nucleoside triphosphate hydrolases); <br>Ribosome post-transcriptional modification and chromosomal segregation cluster
Nucleosides and Nucleotides	fig|273384.15.peg.2562	BAURA86_02601	6	BAURA86	129127	CDS	FXZI01000009	129909	129127	-3	-	783	Deoxycytidine triphosphate deaminase (EC 3.5.4.30) (dUMP-forming)	pyrimidine conversions
Nucleosides and Nucleotides	fig|273384.17.peg.3319	BAUR920_03366	8	BAUR920	2126	CDS	FXZG01000030	3517	2126	-1	-	1392	Dihydropyrimidinase (EC 3.5.2.2)	Hydantoin metabolism
Nucleosides and Nucleotides	fig|273384.16.peg.3125	BAURA63_03174	2	BAURA63	50821	CDS	FXYZ01000017	50821	51072	1	+	252	Glutaredoxin-like protein NrdH, required for reduction of Ribonucleotide reductase class Ib	Glutaredoxins; <br>Glutathione: Redox cycle; <br>Ribonucleotide reduction
Nucleosides and Nucleotides	fig|273384.22.peg.2864	CXR24_15005	3	CXR24	3276948	CDS	CP025331	3276948	3277982	3	+	1035	Periplasmic aromatic aldehyde oxidoreductase, FAD binding subunit YagS @ 4-hydroxybenzoyl-CoA reductase, beta subunit (EC 1.3.99.20)	Purine Utilization
Nucleosides and Nucleotides	fig|273384.15.peg.4021	BAURA86_04078	6	BAURA86	391	CDS	FXZI01000061	391	1311	1	+	921	Thymidylate kinase (EC 2.7.4.9)	pyrimidine conversions
Nucleosides and Nucleotides	fig|273384.22.peg.2867	CXR24_15020	3	CXR24	3280725	CDS	CP025331	3281888	3280725	-2	-	1164	Xanthine and CO dehydrogenases maturation factor, XdhC/CoxF family	Carbon monoxide oxidation; <br>Molybdenum cofactor biosynthesis; <br>Purine Utilization
Phages, Prophages, Transposable elements, Plasmids	fig|273384.15.peg.1762	BAURA86_01790	6	BAURA86	154598	CDS	FXZI01000005	154598	155524	2	+	927	Phage replication protein # ACLAME 208	Phage replication
Phosphorus Metabolism	fig|1703.41.peg.367	BLSMQ_RS01915	0	BLSMQ	429478	CDS	NZ_CP017150	429894	429478	-3	-	417	PhnB protein; putative DNA binding 3-demethylubiquinone-9 3-methyltransferase domain protein	Alkylphosphonate utilization
Protein Metabolism	fig|273384.19.peg.2749	BAUR9175_02785	1	BAUR9175	92403	CDS	FXZB01000019	92403	94340	3	+	1938	Acylamino-acid-releasing enzyme (EC 3.4.19.1)	Omega peptidases (EC 3.4.19.-)
Protein Metabolism	fig|273384.15.peg.4082	BAURA86_04139	6	BAURA86	2	CDS	FXZI01000092	2	448	2	+	447	Arginyl-tRNA synthetase (EC 6.1.1.19)	tRNA aminoacylation, Arg
Protein Metabolism	fig|1703.41.peg.915	BLSMQ_RS04770	0	BLSMQ	1050545	CDS	NZ_CP017150	1052185	1050545	-1	-	1641	Arginyl-tRNA synthetase (EC 6.1.1.19)	tRNA aminoacylation, Arg
Protein Metabolism	fig|1703.41.peg.2685	BLSMQ_RS13965	0	BLSMQ	3048123	CDS	NZ_CP017150	3048123	3049505	3	+	1383	Chaperone protein DnaJ	GroEL GroES; <br>Heat shock dnaK gene cluster extended; <br>Protein chaperones
Protein Metabolism	fig|273384.17.peg.2772	BAUR920_02814	8	BAUR920	58559	CDS	FXZG01000018	58559	60157	2	+	1599	Chaperone protein DnaK	GroEL GroES; <br>Heat shock dnaK gene cluster extended; <br>Protein chaperones
Protein Metabolism	fig|1703.41.peg.1974	BLSMQ_RS10285	0	BLSMQ	2210757	CDS	NZ_CP017150	2212622	2210757	-2	-	1866	Chaperone protein DnaK	GroEL GroES; <br>Heat shock dnaK gene cluster extended; <br>Protein chaperones
Protein Metabolism	fig|1703.41.peg.1970	BLSMQ_RS10265	0	BLSMQ	2206382	CDS	NZ_CP017150	2209009	2206382	-1	-	2628	ClpB protein	Protein chaperones; <br>Proteolysis in bacteria, ATP-dependent
Protein Metabolism	fig|273384.19.peg.3315	BAUR9175_03360	1	BAUR9175	5530	CDS	FXZB01000030	5530	6309	1	+	780	Cytochrome c-type biogenesis protein CcdA (DsbD analog)	Biogenesis of c-type cytochromes; <br>CBSS-196164.1.peg.461; <br>Periplasmic disulfide interchange
Protein Metabolism	fig|273384.21.peg.2974	CXR26_15595	4	CXR26	3368531	CDS	CP025332	3368531	3368953	2	+	423	Cytochrome c-type biogenesis protein CcdA (DsbD analog)	Biogenesis of c-type cytochromes; <br>CBSS-196164.1.peg.461; <br>Periplasmic disulfide interchange
Protein Metabolism	fig|1703.41.peg.1972	BLSMQ_RS10275	0	BLSMQ	2209308	CDS	NZ_CP017150	2210195	2209308	-2	-	888	DnaJ-class molecular chaperone CbpA	Protein chaperones
Protein Metabolism	fig|1703.41.peg.1973	BLSMQ_RS10280	0	BLSMQ	2210199	CDS	NZ_CP017150	2210738	2210199	-2	-	540	Heat shock protein GrpE	GroEL GroES; <br>Heat shock dnaK gene cluster extended; <br>Protein chaperones
Protein Metabolism	fig|1703.46.peg.1217	CIK79_RS06360	9	CIK79	3985242	CDS	NZ_NRGX01000001	1434526	1433843	-1	-	684	Lipid carrier : UDP-N-acetylgalactosaminyltransferase (EC 2.4.1.-)	N-linked Glycosylation in Bacteria
Protein Metabolism	fig|273384.22.peg.3318	CXR24_17390	3	CXR24	3806501	CDS	CP025331	3807595	3806501	-1	-	1095	Lipid carrier : UDP-N-acetylgalactosaminyltransferase (EC 2.4.1.-)	N-linked Glycosylation in Bacteria
Protein Metabolism	fig|273384.26.peg.1342	CXR23_07165	10	CXR23	1526250	CDS	CP025330	1526789	1526250	-2	-	540	Low molecular weight protein tyrosine phosphatase (EC 3.1.3.48)	LMPTP YfkJ cluster; <br>Protein deglycation
Protein Metabolism	fig|273384.26.peg.3321	CXR23_17595	10	CXR23	3815793	CDS	CP025330	3816497	3815793	-2	-	705	Periplasmic thiol:disulfide interchange protein DsbA	Biogenesis of c-type cytochromes; <br>Periplasmic disulfide interchange
Protein Metabolism	fig|273384.17.peg.1615	BAUR920_01643	8	BAUR920	31099	CDS	FXZG01000008	31099	32040	1	+	942	Putative metal chaperone, involved in Zn homeostasis, GTPase of COG0523 family	G3E family of P-loop GTPases (metallocenter biosynthesis); <br>Zinc regulated enzymes
Protein Metabolism	fig|273384.26.peg.3476	CXR23_18425	10	CXR23	4002647	CDS	CP025330	4003771	4002647	-1	-	1125	Putative metal chaperone, involved in Zn homeostasis, GTPase of COG0523 family	G3E family of P-loop GTPases (metallocenter biosynthesis); <br>Zinc regulated enzymes
Protein Metabolism	fig|1703.46.peg.1222	CIK79_RS06385	9	CIK79	3990682	CDS	NZ_NRGX01000001	1441391	1439283	-2	-	2109	UDP-N-acetylglucosamine 4,6-dehydratase (EC 4.2.1.-)	N-linked Glycosylation in Bacteria
Protein Metabolism	fig|273384.22.peg.3309	CXR24_17345	3	CXR24	3794985	CDS	CP025331	3796928	3794985	-2	-	1944	UDP-N-acetylglucosamine 4,6-dehydratase (EC 4.2.1.-)	N-linked Glycosylation in Bacteria
Regulation and Cell sigNDling	fig|273384.15.peg.4050	BAURA86_04107	6	BAURA86	276	CDS	FXZI01000075	276	1148	3	+	873	Adenylate cyclase (EC 4.6.1.1)	cAMP signaling in bacteria
Regulation and Cell sigNDling	fig|273384.26.peg.1447	CXR23_07705	10	CXR23	1647003	CDS	CP025330	1648718	1647003	-2	-	1716	Adenylate cyclase (EC 4.6.1.1)	cAMP signaling in bacteria
Regulation and Cell sigNDling	fig|273384.22.peg.3307	CXR24_17335	3	CXR24	3792893	CDS	CP025331	3793858	3792893	-1	-	966	Cell envelope-associated transcriptional attenuator LytR-CpsA-Psr, subfamily A1 (as in PMID19099556)	Cell envelope-associated LytR-CpsA-Psr transcriptional attenuators
Regulation and Cell sigNDling	fig|273384.20.peg.2654	CXR25_13895	7	CXR25	2990971	CDS	CP025333	2992044	2990971	-3	-	1074	Prophage Clp protease-like protein	cAMP signaling in bacteria
Respiration	fig|273384.15.peg.653	BAURA86_00665	6	BAURA86	88684	CDS	FXZI01000002	89685	88684	-3	-	1002	Arsenate reductase (EC 1.20.4.1)	Anaerobic respiratory reductases; <br>Arsenic resistance; <br>Transcription repair cluster
Respiration	fig|273384.26.peg.2797	CXR23_14870	10	CXR23	3213671	CDS	CP025330	3213671	3214600	2	+	930	Coenzyme F420-dependent oxidoreductase	Anaerobic respiratory reductases
Respiration	fig|273384.22.peg.2866	CXR24_15015	3	CXR24	3280070	CDS	CP025331	3280070	3280759	2	+	690	CTP:molybdopterin cytidylyltransferase	Carbon monoxide oxidation
Respiration	fig|273384.19.peg.387	BAUR9175_00394	1	BAUR9175	79468	CDS	FXZB01000002	79468	80946	1	+	1479	Fumarate reductase flavoprotein subunit (EC 1.3.99.1)	Succinate dehydrogenase
Respiration	fig|273384.17.peg.3317	BAUR920_03364	8	BAUR920	57	CDS	FXZG01000030	1421	57	-2	-	1365	Fumarate reductase flavoprotein subunit (EC 1.3.99.1)	Succinate dehydrogenase
Respiration	fig|273384.19.peg.2706	BAUR9175_02742	1	BAUR9175	46763	CDS	FXZB01000019	46763	47452	2	+	690	Glucose-methanol-choline (GMC) oxidoreductase:NAD binding site	Respiratory dehydrogenases 1
Respiration	fig|273384.19.peg.2707	BAUR9175_02743	1	BAUR9175	47588	CDS	FXZB01000019	47588	48367	2	+	780	Glucose-methanol-choline (GMC) oxidoreductase:NAD binding site	Respiratory dehydrogenases 1
Respiration	fig|273384.17.peg.3328	BAUR920_03375	8	BAUR920	10527	CDS	FXZG01000030	12134	10527	-2	-	1608	Glucose-methanol-choline (GMC) oxidoreductase:NAD binding site	Respiratory dehydrogenases 1
Respiration	fig|273384.26.peg.2802	CXR23_14895	10	CXR23	3219376	CDS	CP025330	3220974	3219376	-3	-	1599	Glucose-methanol-choline (GMC) oxidoreductase:NAD binding site	Respiratory dehydrogenases 1
Respiration	fig|273384.15.peg.3655	BAURA86_03704	6	BAURA86	43839	CDS	FXZI01000020	43839	44798	3	+	960	Quinone oxidoreductase (EC 1.6.5.5)	Quinone oxidoreductase family
RND Metabolism	fig|273384.15.peg.4062	BAURA86_04119	6	BAURA86	206	CDS	FXZI01000081	844	206	-1	-	639	23S rRNA (guanine-N-2-) -methyltransferase rlmG (EC 2.1.1.-) ## LSU rRNA m2G1835	RNA methylation
RND Metabolism	fig|1703.41.peg.2385	BLSMQ_RS19590	0	BLSMQ	2700038	CDS	NZ_CP017150	2701414	2700038	-1	-	1377	Retron-type RNA-directed DNA polymerase (EC 2.7.7.49)	Group II intron-associated genes
RND Metabolism	fig|273384.15.peg.1793	BAURA86_01824	6	BAURA86	189890	CDS	FXZI01000005	189890	190048	2	+	159	Ribonuclease P protein component (EC 3.1.26.5)	tRNA processing
RND Metabolism	fig|273384.26.peg.1473	CXR23_07850	10	CXR23	1675782	CDS	CP025330	1676495	1675782	-2	-	714	RNA polymerase sigma-54 factor RpoN	Transcription initiation, bacterial sigma factors
RND Metabolism	fig|273384.19.peg.335	BAUR9175_00342	1	BAUR9175	23408	CDS	FXZB01000002	23408	24376	2	+	969	RNA polymerase sigma-70 factor	CBSS-313593.3.peg.2729; <br>Transcription initiation, bacterial sigma factors
Secondary Metabolism	fig|273384.17.peg.2633	BAUR920_02674	8	BAUR920	1643	CDS	FXZG01000017	4273	1643	-1	-	2631	Lanthionine biosynthesis protein LanL	Lanthionine Synthetases
Secondary Metabolism	fig|1703.46.peg.781	CIK79_RS04085	9	CIK79	3484066	CDS	NZ_NRGX01000001	932667	935162	3	+	2496	Lanthionine biosynthesis protein LanL	Lanthionine Synthetases
Secondary Metabolism	fig|273384.26.peg.2781	CXR23_14780	10	CXR23	3190655	CDS	CP025330	3190655	3193258	2	+	2604	Lanthionine biosynthesis protein LanL	Lanthionine Synthetases
Stress Response	fig|273384.17.peg.1148	BAUR920_01173	8	BAUR920	87413	CDS	FXZG01000005	88546	87413	-1	-	1134	ABC-type Fe3+-siderophore transport system, permease 2 component	Flavohaemoglobin
Stress Response	fig|273384.16.peg.3806	BAURA63_03863	2	BAURA63	3	CDS	FXYZ01000087	3	239	3	+	237	ABC-type Fe3+-siderophore transport system, permease 2 component	Flavohaemoglobin
Stress Response	fig|273384.15.peg.3870	BAURA86_03923	6	BAURA86	15439	CDS	FXZI01000026	15439	16530	1	+	1092	ABC-type Fe3+-siderophore transport system, permease 2 component	Flavohaemoglobin
Stress Response	fig|273384.15.peg.2041	BAURA86_02075	6	BAURA86	215313	CDS	FXZI01000006	215313	216746	3	+	1434	Choline-sulfatase (EC 3.1.6.6)	Choline and Betaine Uptake and Betaine Biosynthesis; <br>Sulfatases and sulfatase modifying factor 1
Stress Response	fig|273384.15.peg.4081	BAURA86_04138	6	BAURA86	135	CDS	FXZI01000091	135	1028	3	+	894	Diaminobutyrate-pyruvate aminotransferase (EC 2.6.1.46)	Ectoine biosynthesis and regulation
Sulfur Metabolism	fig|273384.15.peg.4064	BAURA86_04121	6	BAURA86	3	CDS	FXZI01000082	3	548	3	+	546	Thiol peroxidase, Tpx-type (EC 1.11.1.15)	Thioredoxin-disulfide reductase
Virulence, Disease and Defense	fig|273384.15.peg.653	BAURA86_00665	6	BAURA86	88684	CDS	FXZI01000002	89685	88684	-3	-	1002	Arsenate reductase (EC 1.20.4.1)	Anaerobic respiratory reductases; <br>Arsenic resistance; <br>Transcription repair cluster
Virulence, Disease and Defense	fig|273384.19.peg.2744	BAUR9175_02780	1	BAUR9175	86112	CDS	FXZB01000019	87587	86112	-2	-	1476	Beta-lactamase (EC 3.5.2.6)	Beta-lactamase
Virulence, Disease and Defense	fig|273384.19.peg.2746	BAUR9175_02782	1	BAUR9175	89250	CDS	FXZB01000019	90164	89250	-2	-	915	Beta-lactamase (EC 3.5.2.6)	Beta-lactamase
Virulence, Disease and Defense	fig|273384.15.peg.3851	BAURA86_03904	6	BAURA86	25248	CDS	FXZI01000025	25248	27038	3	+	1791	Beta-lactamase class C and other penicillin binding proteins	Beta-lactamase
Virulence, Disease and Defense	fig|273384.19.peg.1592	BAUR9175_01615	1	BAUR9175	146204	CDS	FXZB01000009	146677	146204	-1	-	474	Chromate transport protein ChrA	Resistance to chromium compounds
Virulence, Disease and Defense	fig|273384.16.peg.3461	BAURA63_03510	2	BAURA63	16472	CDS	FXYZ01000026	17398	16472	-1	-	927	Cobalt-zinc-cadmium resistance protein CzcD	Cobalt-zinc-cadmium resistance
Virulence, Disease and Defense	fig|273384.21.peg.2531	CXR26_13290	4	CXR26	2862029	CDS	CP025332	2862029	2862997	2	+	969	Cobalt-zinc-cadmium resistance protein CzcD	Cobalt-zinc-cadmium resistance
Virulence, Disease and Defense	fig|273384.26.peg.3346	CXR23_17720	10	CXR23	3841664	CDS	CP025330	3841876	3841664	-1	-	213	Copper chaperone	Copper homeostasis
Virulence, Disease and Defense	fig|273384.25.peg.2785	CXR27_14690	5	CXR27	3209944	CDS	CP025334	3209944	3211995	1	+	2052	Copper resistance protein D	Copper homeostasis; <br>Copper uptake system CopCD
Virulence, Disease and Defense	fig|273384.17.peg.1157	BAUR920_01182	8	BAUR920	96147	CDS	FXZG01000005	97274	96147	-2	-	1128	Cu(I)-responsive transcriptional regulator	Copper homeostasis
Virulence, Disease and Defense	fig|273384.26.peg.3344	CXR23_17710	10	CXR23	3838341	CDS	CP025330	3840671	3838341	-2	-	2331	Lead, cadmium, zinc and mercury transporting ATPase (EC 3.6.3.3) (EC 3.6.3.5); Copper-translocating P-type ATPase (EC 3.6.3.4)	Copper Transport System; <br>Copper homeostasis
Virulence, Disease and Defense	fig|273384.25.peg.2786	CXR27_14695	5	CXR27	3211992	CDS	CP025334	3211992	3214238	3	+	2247	Lead, cadmium, zinc and mercury transporting ATPase (EC 3.6.3.3) (EC 3.6.3.5); Copper-translocating P-type ATPase (EC 3.6.3.4)	Copper Transport System; <br>Copper homeostasis
Virulence, Disease and Defense	fig|273384.25.peg.1874	CXR27_09880	5	CXR27	2133759	CDS	CP025334	2133759	2135180	3	+	1422	Mercuric ion reductase (EC 1.16.1.1)	Mercuric reductase; <br>Mercury resistance operon
Virulence, Disease and Defense	fig|273384.25.peg.1873	CXR27_09875	5	CXR27	2133264	CDS	CP025334	2133653	2133264	-2	-	390	Mercuric resistance operon regulatory protein	Mercury resistance operon
Virulence, Disease and Defense	fig|273384.21.peg.2529	CXR26_13275	4	CXR26	2857314	CDS	CP025332	2860082	2857314	-2	-	2769	Multicopper oxidase	Copper homeostasis
Virulence, Disease and Defense	fig|273384.26.peg.3322	CXR23_17600	10	CXR23	3816541	CDS	CP025330	3816861	3816541	-3	-	321	Organomercurial lyase (EC 4.99.1.2)	Mercury resistance operon
Virulence, Disease and Defense	fig|273384.16.peg.2077	BAURA63_02107	2	BAURA63	185194	CDS	FXYZ01000007	185194	185577	1	+	384	Transcriptional regulator, MerR family	Cobalt-zinc-cadmium resistance
Virulence, Disease and Defense	fig|273384.15.peg.1387	BAURA86_01408	6	BAURA86	8502	CDS	FXZI01000004	9152	8502	-2	-	651	Transcriptional regulator, MerR family	Cobalt-zinc-cadmium resistance
Virulence, Disease and Defense	fig|1703.41.peg.1786	BLSMQ_RS09255	0	BLSMQ	2009580	CDS	NZ_CP017150	2009909	2009580	-2	-	330	Transcriptional regulator, MerR family	Cobalt-zinc-cadmium resistance
Virulence, Disease and Defense	fig|273384.26.peg.3354	CXR23_17765	10	CXR23	3850419	CDS	CP025330	3850419	3850835	3	+	417	Transcriptional regulator, MerR family	Cobalt-zinc-cadmium resistance

## Sheet: Supplementary Table S1 (B)
Supplementary Table S1 Functional classification of B. aurantiacum orphan genes. List of all orphan genes with genomes, locus tag identifiers, genomic positions, predicted function, and subsystem category assigned by RAST.
Supplementary Table S1 (B) ORFans analysis				Functionnal classification - RAST subsystem categories
									Orfans main RAST subsystem categories (gene count ≥5)
	Gene counts	Percentage		RAST subsystem category	RAST classification	Manual classification	Total
Total Orfans	1790	100		ND	1512				RAST subsystem category	Total gene count
Without RAST subsystem category	1511	84.4134		Membrane Transport	45	59	104		Phage and mobile element proteins	112
With RAST subsystem category	279	15.5866		DNA Metabolism	44	54	98		Membrane transport	104
		0		Amino Acids and Derivatives	37	5	42		DNA and RNA metabolism	99
Hypothetical protein	886	49.4972		Cell Wall and Capsule	21	0	21		Transcriptional regulators	83
Protein with putative function	125	6.98324		Virulence, Disease and Defense	20	6	26		Carbohydrates	46
Miscellaneous	100	5.97765		Carbohydrates	19	27	46		Amino acids and derivatives	42
		0		Protein Metabolism	19	10	29		Protein metabolism	29
ORFans with RAST subsystem category assigned manually	393	21.9553		Cell Division and Cell Cycle	13	5	18		Virulence, disease and defense	26
RAST classification + manual classification	679	37.933		Respiration	10	15	25		Respiration	25
				Nucleosides and Nucleotides	9	0	9		Cell wall and capsule	21
				Metabolism of Aromatic Compounds	7	0	7		Cell division and cell cycle	18
				Nitrogen Metabolism	5	0	5		Fatty acids, lipids and isoprenoids	10
				RNA Metabolism	5	1	6		Iron acquisition and metabolism	9
				Stress Response	5	2	7		Nucleosides and nucleotides	9
				Regulation and Cell signaling	4	4	8		Regulation and cell signaling	8
				Iron acquisition and metabolism	3	6	9		Metabolism of aromatic compounds	7
				Miscellaneous	3	0	3		Stress response	7
				Secondary Metabolism	3	0	3		Nitrogen metabolism	5
				Cofactors, Vitamins, Prosthetic Groups, Pigments	1	0	1
				Dormancy and Sporulation	1	0	1		Total	660
				Fatty Acids, Lipids, and Isoprenoids	1	9	10
				Phage and mobile element proteins	1	111	112
				Phosphorus Metabolism	1	1	2
				Sulfur Metabolism	1	3	4
				Transcriptional regulation	0	83	83
				Hypothetical protein			886
				Protein with putative function			125
				Miscellaneous			100
						Total	1790

## Sheet: Supplementary Table S1 (C)
Supplementary Table S1 Functional classification of B. aurantiacum orphan genes. List of all orphan genes with genomes, locus tag identifiers, genomic positions, predicted function, and subsystem category assigned by RAST.
Supplementary Table S1 (C) ORFans manual classification
RAST subsystem category	Feature.ID	Locus tag	V1	Genome	V4	Type	Contig	Start	Stop	Frame	Strand	Length..bp.	Function	Subsystem
Amino Acids and Derivatives	fig|273384.19.peg.2743	BAUR9175_02779	1	BAUR9175	84637	CDS	FXZB01000019	86115	84637	-3	-	1479	N-acyl-D-aspartate/D-glutamate deacylase	- none -
Amino Acids and Derivatives	fig|273384.26.peg.2948	CXR23_15665	10	CXR23	3391321	CDS	CP025330	3391321	3392859	1	+	1539	N-acyl-D-aspartate/D-glutamate deacylase	- none -
Amino Acids and Derivatives	fig|273384.15.peg.544	BAURA86_00556	6	BAURA86	609954	CDS	FXZI01000001	610760	609954	-2	-	807	Phenylacetic acid degradation operon negative regulatory protein paaX	- none -
Amino Acids and Derivatives	fig|273384.15.peg.411	BAURA86_00420	6	BAURA86	462466	CDS	FXZI01000001	463086	462466	-3	-	621	Phosphoserine phosphatase	- none -
Amino Acids and Derivatives	fig|1703.41.peg.307	BLSMQ_RS01600	0	BLSMQ	351497	CDS	NZ_CP017150	351497	352927	2	+	1431	Proline,Na+ Cotransport	- none -
Carbohydrates	fig|1703.46.peg.2016	CIK79_RS10500	9	CIK79	588954	CDS	NZ_NRGX01000001	2348169	2350250	3	+	2082	Beta-1,3-glucosyltransferase	- none -
Carbohydrates	fig|273384.21.peg.3250	CXR26_17050	4	CXR26	3688325	CDS	CP025332	3688867	3688325	-1	-	543	Beta-1,3-glucosyltransferase	- none -
Carbohydrates	fig|273384.17.peg.1358	BAUR920_01385	8	BAUR920	119391	CDS	FXZG01000006	120233	119391	-2	-	843	dTDP-4-dehydrorhamnose reductase (EC 1.1.1.133)	- none -
Carbohydrates	fig|273384.22.peg.3310	CXR24_17350	3	CXR24	3797285	CDS	CP025331	3797285	3798322	2	+	1038	Exopolysaccharide biosynthesis glycosyltransferase EpsF (EC 2.4.1.-)	- none -
Carbohydrates	fig|273384.16.peg.3507	BAURA63_03556	2	BAURA63	188	CDS	FXYZ01000028	188	400	2	+	213	Exopolysaccharide biosynthesis protein EpsI, predicted pyruvyl transferase	- none -
Carbohydrates	fig|273384.16.peg.3686	BAURA63_03740	2	BAURA63	1134	CDS	FXYZ01000043	1727	1134	-2	-	594	Exopolysaccharide biosynthesis protein EpsI, predicted pyruvyl transferase	- none -
Carbohydrates	fig|273384.19.peg.3701	BAUR9175_03751	1	BAUR9175	7468	CDS	FXZB01000047	7468	10308	1	+	2841	Glycosyl transferase	- none -
Carbohydrates	fig|1703.46.peg.3255	CIK79_RS16980	9	CIK79	1972297	CDS	NZ_NRGX01000001	3731512	3732426	1	+	915	Glycosyl transferase	- none -
Carbohydrates	fig|1703.46.peg.3254	CIK79_RS16975	9	CIK79	1971730	CDS	NZ_NRGX01000001	3730945	3731475	1	+	531	Glycosyl transferase, family 2	- none -
Carbohydrates	fig|273384.26.peg.518	CXR23_02740	10	CXR23	606470	CDS	CP025330	606470	608158	2	+	1689	Glycosyl transferase, family 2	- none -
Carbohydrates	fig|273384.21.peg.1643	CXR26_08650	4	CXR26	1842704	CDS	CP025332	1842704	1843555	2	+	852	Glycosyl transferase, family 2	- none -
Carbohydrates	fig|1703.41.peg.471	BLSMQ_RS02450	0	BLSMQ	554086	CDS	NZ_CP017150	554086	555171	1	+	1086	Glycosyl transferase, group 1	- none -
Carbohydrates	fig|273384.22.peg.2836	CXR24_14865	3	CXR24	3245993	CDS	CP025331	3247168	3245993	-1	-	1176	Glycosyl transferase, group 1	- none -
Carbohydrates	fig|273384.25.peg.522	CXR27_02700	5	CXR27	601955	CDS	CP025334	601955	604291	2	+	2337	Glycosyl transferase, group 1	- none -
Carbohydrates	fig|273384.16.peg.3519	BAURA63_03568	2	BAURA63	21872	CDS	FXYZ01000028	26488	21872	-1	-	4617	Glycosyl transferase, group 1 family protein	- none -
Carbohydrates	fig|273384.17.peg.1622	BAUR920_01650	8	BAUR920	40561	CDS	FXZG01000008	40561	41412	1	+	852	Glycosyltransferase	- none -
Carbohydrates	fig|273384.15.peg.3610	BAURA86_03659	6	BAURA86	31942	CDS	FXZI01000019	31942	34134	1	+	2193	Glycosyltransferase	- none -
Carbohydrates	fig|273384.22.peg.498	CXR24_02615	3	CXR24	589518	CDS	CP025331	591089	589518	-2	-	1572	Glycosyltransferase	- none -
Carbohydrates	fig|273384.16.peg.3508	BAURA63_03557	2	BAURA63	671	CDS	FXYZ01000028	671	4363	2	+	3693	Glycosyltransferase (EC 2.4.1.-)	- none -
Carbohydrates	fig|1703.41.peg.2975	BLSMQ_RS15470	0	BLSMQ	3372790	CDS	NZ_CP017150	3374628	3372790	-3	-	1839	Glycosyltransferase (EC 2.4.1.-)	- none -
Carbohydrates	fig|1703.46.peg.1215	CIK79_RS06350	9	CIK79	3982711	CDS	NZ_NRGX01000001	1432511	1431312	-2	-	1200	Glycosyltransferase (EC 2.4.1.-)	- none -
Carbohydrates	fig|273384.22.peg.2837	CXR24_14870	3	CXR24	3247165	CDS	CP025331	3250014	3247165	-3	-	2850	Glycosyltransferase (EC 2.4.1.-)	- none -
Carbohydrates	fig|273384.19.peg.2335	BAUR9175_02366	1	BAUR9175	123239	CDS	FXZB01000015	123239	123997	2	+	759	Maltose O-acetyltransferase (EC 2.3.1.79)	- none -
Carbohydrates	fig|273384.22.peg.2840	CXR24_14885	3	CXR24	3251977	CDS	CP025331	3253794	3251977	-3	-	1818	Poly(glycerol-phosphate) alpha-glucosyltransferase (EC 2.4.1.52)	- none -
Carbohydrates	fig|273384.26.peg.1340	CXR23_07155	10	CXR23	1524311	CDS	CP025330	1524311	1525165	2	+	855	Polysaccharide deacetylase	- none -
Carbohydrates	fig|273384.20.peg.469	CXR25_02440	7	CXR25	534606	CDS	CP025333	534606	537680	3	+	3075	Polysaccharide pyruvyl transferase	- none -
Carbohydrates	fig|273384.25.peg.2774	CXR27_14625	5	CXR27	3199292	CDS	CP025334	3200602	3199292	-1	-	1311	UDP-glucose dehydrogenase (EC 1.1.1.22)	- none -
Cell Division and Cell Cycle	fig|273384.19.peg.2915	BAUR9175_02954	1	BAUR9175	3077	CDS	FXZB01000022	3077	4567	2	+	1491	FtsK/SpoIIIE family protein	- none -
Cell Division and Cell Cycle	fig|273384.19.peg.2417	BAUR9175_02448	1	BAUR9175	89888	CDS	FXZB01000016	89888	90964	2	+	1077	Replication initiator protein	- none -
Cell Division and Cell Cycle	fig|273384.17.peg.3019	BAUR920_03063	8	BAUR920	25171	CDS	FXZG01000022	26592	25171	-3	-	1422	Replication protein	- none -
Cell Division and Cell Cycle	fig|273384.15.peg.3935	BAURA86_03988	6	BAURA86	3076	CDS	FXZI01000030	3615	3076	-3	-	540	Replication region DNA-binding N-term	- none -
Cell Division and Cell Cycle	fig|273384.15.peg.1374	BAURA86_01395	6	BAURA86	341673	CDS	FXZI01000003	342218	341673	-2	-	546	Replication region DNA-binding N-term	- none -
DNA Metabolism	fig|273384.21.peg.2533	CXR26_13305	4	CXR26	2865384	CDS	CP025332	2866274	2865384	-2	-	891	Adenine-specific DNA methyltransferase	- none -
DNA Metabolism	fig|1703.46.peg.1652	CIK79_RS08630	9	CIK79	171637	CDS	NZ_NRGX01000001	1931934	1930852	-3	-	1083	Adenine-specific methyltransferase (EC 2.1.1.72)	CBSS-257314.1.peg.752
DNA Metabolism	fig|1703.46.peg.55	CIK79_RS00275	9	CIK79	2619411	CDS	NZ_NRGX01000001	69043	68012	-1	-	1032	Adenine-specific methyltransferase (EC 2.1.1.72)	CBSS-257314.1.peg.752
DNA Metabolism	fig|273384.15.peg.4034	BAURA86_04091	6	BAURA86	552	CDS	FXZI01000068	552	1106	3	+	555	ATP-dependent DNA helicase RecG (EC 3.6.1.-)	- none -
DNA Metabolism	fig|1703.46.peg.2004	CIK79_RS10440	9	CIK79	571024	CDS	NZ_NRGX01000001	2331609	2330239	-3	-	1371	ATP-dependent DNA helicase RecG-related protein	- none -
DNA Metabolism	fig|273384.20.peg.218	CXR25_01150	7	CXR25	237270	CDS	CP025333	237270	239441	3	+	2172	ATP-dependent DNA helicase rep (EC 3.6.1.-)	- none -
DNA Metabolism	fig|273384.20.peg.2239	CXR25_11730	7	CXR25	2526869	CDS	CP025333	2528890	2526869	-1	-	2022	Bipolar DNA helicase HerA	Rad50-Mre11 DNA repair cluster
DNA Metabolism	fig|273384.20.peg.2679	CXR25_14025	7	CXR25	3006291	CDS	CP025333	3007808	3006291	-2	-	1518	C-5 cytosine-specific DNA methylase family protein	- none -
DNA Metabolism	fig|273384.16.peg.2530	BAURA63_02568	2	BAURA63	7700	CDS	FXYZ01000011	9223	7700	-1	-	1524	Carboxypeptidase-related protein	- none -
DNA Metabolism	fig|1703.46.peg.1635	CIK79_RS08545	9	CIK79	158731	CDS	NZ_NRGX01000001	1918710	1917946	-3	-	765	DNA alkylation repair enzyme	- none -
DNA Metabolism	fig|273384.22.peg.2263	CXR24_11890	3	CXR24	2578086	CDS	CP025331	2578086	2578850	3	+	765	DNA helicase related protein	- none -
DNA Metabolism	fig|273384.19.peg.2928	BAUR9175_02968	1	BAUR9175	21909	CDS	FXZB01000022	21909	23417	3	+	1509	DNA invertase	- none -
DNA Metabolism	fig|273384.20.peg.2620	CXR25_13720	7	CXR25	2958222	CDS	CP025333	2958222	2959853	3	+	1632	DNA primase (EC 2.7.7.-), phage-associated	- none -
DNA Metabolism	fig|273384.15.peg.1613	BAURA86_01640	6	BAURA86	238143	CDS	FXZI01000004	238143	241073	3	+	2931	DNA primase domain protein	- none -
DNA Metabolism	fig|273384.17.peg.1832	BAUR920_01860	8	BAUR920	140687	CDS	FXZG01000009	141160	140687	-1	-	474	DNA-binding response regulator, LuxR family	- none -
DNA Metabolism	fig|273384.15.peg.638	BAURA86_00650	6	BAURA86	75215	CDS	FXZI01000002	75215	76003	2	+	789	DNA-binding response regulator, LuxR family	- none -
DNA Metabolism	fig|273384.15.peg.1746	BAURA86_01774	6	BAURA86	140277	CDS	FXZI01000005	140978	140277	-2	-	702	DNA-binding response regulator, LuxR family	- none -
DNA Metabolism	fig|273384.15.peg.3847	BAURA86_03900	6	BAURA86	19626	CDS	FXZI01000025	19626	22751	3	+	3126	DNA-directed DNA polymerase	- none -
DNA Metabolism	fig|273384.15.peg.3882	BAURA86_03935	6	BAURA86	6448	CDS	FXZI01000027	7062	6448	-3	-	615	DNA-invertase	- none -
DNA Metabolism	fig|273384.20.peg.2694	CXR25_14100	7	CXR25	3015388	CDS	CP025333	3015388	3016803	1	+	1416	DNA-invertase	- none -
DNA Metabolism	fig|273384.17.peg.3205	BAUR920_03252	8	BAUR920	17006	CDS	FXZG01000026	17006	20134	2	+	3129	Endonuclease	- none -
DNA Metabolism	fig|1703.41.peg.284	BLSMQ_RS01475	0	BLSMQ	322112	CDS	NZ_CP017150	322112	325228	2	+	3117	Endonuclease	- none -
DNA Metabolism	fig|273384.22.peg.2285	CXR24_12015	3	CXR24	2612660	CDS	CP025331	2612660	2613160	2	+	501	Enzyme; Degradation of DNA	- none -
DNA Metabolism	fig|273384.19.peg.2906	BAUR9175_02945	1	BAUR9175	74716	CDS	FXZB01000021	75153	74716	-3	-	438	Exoenzymes regulatory protein AepA precursor	- none -
DNA Metabolism	fig|1703.41.peg.2361	BLSMQ_RS12290	0	BLSMQ	2665652	CDS	NZ_CP017150	2665879	2665652	-1	-	228	Exonuclease V subunit beta	- none -
DNA Metabolism	fig|1703.41.peg.2352	BLSMQ_RS12250	0	BLSMQ	2655067	CDS	NZ_CP017150	2657058	2655067	-3	-	1992	FIG006126: DNA helicase, restriction/modification system component YeeB	CBSS-316273.3.peg.2378
DNA Metabolism	fig|273384.17.peg.2850	BAUR920_02893	8	BAUR920	69912	CDS	FXZG01000019	69912	72710	3	+	2799	FIG045374: Type II restriction enzyme, methylase subunit YeeA	- none -
DNA Metabolism	fig|273384.16.peg.3076	BAURA63_03125	2	BAURA63	80	CDS	FXYZ01000017	1225	80	-1	-	1146	FIG045374: Type II restriction enzyme, methylase subunit YeeA	- none -
DNA Metabolism	fig|273384.16.peg.3481	BAURA63_03530	2	BAURA63	27140	CDS	FXYZ01000026	28762	27140	-1	-	1623	FIG045374: Type II restriction enzyme, methylase subunit YeeA	- none -
DNA Metabolism	fig|1703.41.peg.1977	BLSMQ_RS10300	0	BLSMQ	2214956	CDS	NZ_CP017150	2216599	2214956	-1	-	1644	FIG045374: Type II restriction enzyme, methylase subunit YeeA	CBSS-316273.3.peg.2378
DNA Metabolism	fig|1703.41.peg.1978	BLSMQ_RS10310	0	BLSMQ	2217600	CDS	NZ_CP017150	2218748	2217600	-2	-	1149	FIG045374: Type II restriction enzyme, methylase subunit YeeA	CBSS-316273.3.peg.2378
DNA Metabolism	fig|1703.41.peg.2353	BLSMQ_RS12255	0	BLSMQ	2657055	CDS	NZ_CP017150	2659772	2657055	-2	-	2718	FIG045374: Type II restriction enzyme, methylase subunit YeeA	CBSS-316273.3.peg.2378
DNA Metabolism	fig|273384.21.peg.2186	CXR26_11495	4	CXR26	2470958	CDS	CP025332	2473750	2470958	-1	-	2793	FIG045374: Type II restriction enzyme, methylase subunit YeeA	- none -
DNA Metabolism	fig|273384.21.peg.2534	CXR26_13310	4	CXR26	2866403	CDS	CP025332	2866403	2868115	2	+	1713	GTPase subunit of restriction endonuclease	- none -
DNA Metabolism	fig|273384.25.peg.2363	CXR27_12460	5	CXR27	2709633	CDS	CP025334	2713100	2709633	-2	-	3468	helicase, SNF2 family	- none -
DNA Metabolism	fig|273384.15.peg.887	BAURA86_00902	6	BAURA86	335759	CDS	FXZI01000002	335759	337639	2	+	1881	Helicase, SNF2/RAD54 family	- none -
DNA Metabolism	fig|273384.26.peg.420	CXR23_02235	10	CXR23	483670	CDS	CP025330	483670	485562	1	+	1893	Helicase, SNF2/RAD54 family	- none -
DNA Metabolism	fig|273384.17.peg.288	BAUR920_00294	8	BAUR920	324159	CDS	FXZG01000001	324515	324159	-2	-	357	HNH endonuclease family protein	- none -
DNA Metabolism	fig|273384.26.peg.2831	CXR23_15045	10	CXR23	3250080	CDS	CP025330	3250080	3250841	3	+	762	Methyltransferase (EC 2.1.1.-)	- none -
DNA Metabolism	fig|273384.25.peg.1533	CXR27_08070	5	CXR27	1764796	CDS	CP025334	1764796	1766352	1	+	1557	Recombinase	- none -
DNA Metabolism	fig|273384.25.peg.2808	CXR27_14805	5	CXR27	3236824	CDS	CP025334	3238347	3236824	-3	-	1524	Recombinase	- none -
DNA Metabolism	fig|273384.21.peg.3037	CXR26_15930	4	CXR26	3438914	CDS	CP025332	3439729	3438914	-1	-	816	SAM-dependent methyltransferase DSY4148 (UbiE paralog)	- none -
DNA Metabolism	fig|273384.26.peg.2837	CXR23_15075	10	CXR23	3259913	CDS	CP025330	3259913	3260377	2	+	465	Single-strand binding protein/Primosomal replication protein n	- none -
DNA Metabolism	fig|273384.26.peg.3318	CXR23_17575	10	CXR23	3812115	CDS	CP025330	3812576	3812115	-2	-	462	Single-strand binding protein/Primosomal replication protein n	- none -
DNA Metabolism	fig|273384.25.peg.2806	CXR27_14795	5	CXR27	3235627	CDS	CP025334	3235627	3236091	1	+	465	Single-strand binding protein/Primosomal replication protein n	- none -
DNA Metabolism	fig|1703.46.peg.1	CIK79_RS00005	9	CIK79	2551400	CDS	NZ_NRGX01000001	628	1	-1	-	628	Single-stranded DNA-binding protein	- none -
DNA Metabolism	fig|273384.19.peg.2935	BAUR9175_02975	1	BAUR9175	27646	CDS	FXZB01000022	28224	27646	-3	-	579	Site-specific recombinase	- none -
DNA Metabolism	fig|1703.46.peg.1627	CIK79_RS08505	9	CIK79	150452	CDS	NZ_NRGX01000001	1911613	1909667	-1	-	1947	Site-specific recombinase for integration and excision	- none -
DNA Metabolism	fig|273384.15.peg.1611	BAURA86_01638	6	BAURA86	235949	CDS	FXZI01000004	235949	237502	2	+	1554	Site-specific recombinases, DNA invertase Pin homologs	- none -
DNA Metabolism	fig|1703.41.peg.271	BLSMQ_RS01420	0	BLSMQ	302166	CDS	NZ_CP017150	302166	302741	3	+	576	Superfamily II DNA and RNA helicase	- none -
DNA Metabolism	fig|1703.41.peg.274	BLSMQ_RS01435	0	BLSMQ	305323	CDS	NZ_CP017150	305323	307836	1	+	2514	Superfamily II DNA and RNA helicase	- none -
DNA Metabolism	fig|273384.15.peg.888	BAURA86_00903	6	BAURA86	337639	CDS	FXZI01000002	337639	338199	1	+	561	SWF/SNF family helicase	- none -
DNA Metabolism	fig|1703.46.peg.161	CIK79_RS00855	9	CIK79	2759316	CDS	NZ_NRGX01000001	211129	207917	-1	-	3213	Type II restriction enzyme, methylase subunits	- none -
DNA Metabolism	fig|273384.19.peg.3652	BAUR9175_03702	1	BAUR9175	2573	CDS	FXZB01000044	3265	2573	-1	-	693	Ulcer associated adenine specific DNA methyltransferase	- none -
Fatty Acids, Lipids, and Isoprenoids	fig|273384.15.peg.2828	BAURA86_02868	6	BAURA86	61763	CDS	FXZI01000011	62704	61763	-1	-	942	Carboxylesterase	- none -
Fatty Acids, Lipids, and Isoprenoids	fig|273384.26.peg.2795	CXR23_14860	10	CXR23	3212281	CDS	CP025330	3212281	3213126	1	+	846	COG0657: Esterase/lipase	- none -
Fatty Acids, Lipids, and Isoprenoids	fig|273384.17.peg.3337	BAUR920_03384	8	BAUR920	19350	CDS	FXZG01000030	20270	19350	-2	-	921	Esterase/lipase	- none -
Fatty Acids, Lipids, and Isoprenoids	fig|273384.21.peg.293	CXR26_01550	4	CXR26	330311	CDS	CP025332	330311	331540	2	+	1230	Fatty-acid-CoA ligase FadD7	- none -
Fatty Acids, Lipids, and Isoprenoids	fig|1703.46.peg.1221	CIK79_RS06380	9	CIK79	3989462	CDS	NZ_NRGX01000001	1439286	1438063	-3	-	1224	Lipopolysaccharide biosynthesis protein RffA	- none -
Fatty Acids, Lipids, and Isoprenoids	fig|1703.46.peg.37	CIK79_RS00185	9	CIK79	2600669	CDS	NZ_NRGX01000001	50448	49270	-3	-	1179	LysM domain / Lipoprotein NlpD	Stationary phase repair cluster
Fatty Acids, Lipids, and Isoprenoids	fig|273384.26.peg.2793	CXR23_14850	10	CXR23	3210254	CDS	CP025330	3210254	3211486	2	+	1233	Lysophospholipid acyltransferase	- none -
Fatty Acids, Lipids, and Isoprenoids	fig|1703.46.peg.2068	CIK79_RS10775	9	CIK79	648441	CDS	NZ_NRGX01000001	2407656	2409332	3	+	1677	Medium-chain-fatty-acid--CoA ligase (EC 6.2.1.-)	- none -
Fatty Acids, Lipids, and Isoprenoids	fig|273384.26.peg.403	CXR23_02145	10	CXR23	462533	CDS	CP025330	462533	463336	2	+	804	Oleate hydratase (EC 4.2.1.53)	- none -
Hypothetical	fig|273384.15.peg.643	BAURA86_00655	6	BAURA86	81382	CDS	FXZI01000002	82089	81382	-3	-	708	COG2719: Uncharacterized conserved protein	- none -
Hypothetical	fig|273384.17.peg.3197	BAUR920_03244	8	BAUR920	2736	CDS	FXZG01000026	4640	2736	-2	-	1905	Conserved domain protein	- none -
Hypothetical	fig|273384.15.peg.881	BAURA86_00896	6	BAURA86	329303	CDS	FXZI01000002	330226	329303	-1	-	924	Conserved hypothetical protein 2SC10A7.05c	- none -
Hypothetical	fig|273384.17.peg.3527	BAUR920_03577	8	BAUR920	3489	CDS	FXZG01000041	5198	3489	-2	-	1710	Conserved hypothetical protein SC6F7.06c	- none -
Hypothetical	fig|273384.19.peg.2933	BAUR9175_02973	1	BAUR9175	26355	CDS	FXZB01000022	26355	26711	3	+	357	Conserved protein	- none -
Hypothetical	fig|273384.15.peg.556	BAURA86_00568	6	BAURA86	619474	CDS	FXZI01000001	619474	620463	1	+	990	DUF1526 domain-containing protein	- none -
Hypothetical	fig|273384.15.peg.459	BAURA86_00470	6	BAURA86	512301	CDS	FXZI01000001	512301	513326	3	+	1026	FIG00351855: Hypothetical protein	- none -
Hypothetical	fig|273384.26.peg.2833	CXR23_15055	10	CXR23	3251640	CDS	CP025330	3251640	3252218	3	+	579	FIG00447681: Hypothetical protein	- none -
Hypothetical	fig|273384.26.peg.3320	CXR23_17585	10	CXR23	3814438	CDS	CP025330	3814953	3814438	-3	-	516	FIG00447681: Hypothetical protein	- none -
Hypothetical	fig|273384.19.peg.1751	BAUR9175_01774	1	BAUR9175	27536	CDS	FXZB01000011	27922	27536	-1	-	387	FIG00447935: Hypothetical protein	- none -
Hypothetical	fig|1703.46.peg.2604	CIK79_RS13595	9	CIK79	1253421	CDS	NZ_NRGX01000001	3012636	3014030	3	+	1395	FIG00448179: Hypothetical protein	- none -
Hypothetical	fig|1703.46.peg.2622	CIK79_RS13695	9	CIK79	1273546	CDS	NZ_NRGX01000001	3034155	3032761	-3	-	1395	FIG00448179: Hypothetical protein	- none -
Hypothetical	fig|1703.46.peg.2891	CIK79_RS15105	9	CIK79	1573924	CDS	NZ_NRGX01000001	3334533	3333139	-3	-	1395	FIG00448179: Hypothetical protein	- none -
Hypothetical	fig|273384.15.peg.4010	BAURA86_04067	6	BAURA86	1143	CDS	FXZI01000056	1143	1379	3	+	237	FIG00448465: Hypothetical protein	- none -
Hypothetical	fig|273384.15.peg.4055	BAURA86_04112	6	BAURA86	3	CDS	FXZI01000078	245	3	-2	-	243	FIG00448603: Hypothetical protein	- none -
Hypothetical	fig|273384.26.peg.532	CXR23_02815	10	CXR23	625275	CDS	CP025330	626033	625275	-2	-	759	FIG00462249: Hypothetical protein	- none -
Hypothetical	fig|273384.26.peg.2768	CXR23_14715	10	CXR23	3168098	CDS	CP025330	3168098	3171598	2	+	3501	FIG00464231: Hypothetical protein	- none -
Hypothetical	fig|273384.25.peg.1875	CXR27_09885	5	CXR27	2135221	CDS	CP025334	2135221	2135532	1	+	312	FIG00548336: Hypothetical protein	- none -
Hypothetical	fig|273384.16.peg.3234	BAURA63_03283	2	BAURA63	10800	CDS	FXYZ01000020	10800	13388	3	+	2589	FIG00725033: Hypothetical protein	- none -
Hypothetical	fig|273384.17.peg.3210	BAUR920_03257	8	BAUR920	24762	CDS	FXZG01000026	24762	26345	3	+	1584	FIG00793576: Hypothetical protein	- none -
Hypothetical	fig|273384.16.peg.2078	BAURA63_02108	2	BAURA63	185701	CDS	FXYZ01000007	185701	186510	1	+	810	FIG00804569: Hypothetical protein	- none -
Hypothetical	fig|273384.21.peg.398	CXR26_02080	4	CXR26	452142	CDS	CP025332	452142	453461	3	+	1320	FIG00814202: Hypothetical protein	- none -
Hypothetical	fig|273384.15.peg.582	BAURA86_00594	6	BAURA86	17476	CDS	FXZI01000002	17476	18153	1	+	678	FIG00821404: Hypothetical protein	- none -
Hypothetical	fig|273384.16.peg.3792	BAURA63_03849	2	BAURA63	229	CDS	FXYZ01000078	229	1137	1	+	909	FIG00830864: Hypothetical protein	- none -
Hypothetical	fig|273384.15.peg.4004	BAURA86_04061	6	BAURA86	51	CDS	FXZI01000053	1304	51	-2	-	1254	FIG00830864: Hypothetical protein	- none -
Hypothetical	fig|273384.15.peg.3993	BAURA86_04050	6	BAURA86	374	CDS	FXZI01000045	374	1594	2	+	1221	FIG00830864: Hypothetical protein	- none -
Hypothetical	fig|273384.17.peg.1658	BAUR920_01686	8	BAUR920	92439	CDS	FXZG01000008	92439	93650	3	+	1212	FIG00866611: Hypothetical protein	- none -
Hypothetical	fig|273384.22.peg.2278	CXR24_11975	3	CXR24	2597368	CDS	CP025331	2597368	2600304	1	+	2937	FIG00897069: Hypothetical protein	- none -
Hypothetical	fig|273384.26.peg.3366	CXR23_17825	10	CXR23	3860345	CDS	CP025330	3861040	3860345	-1	-	696	FIG00986051: Hypothetical protein	- none -
Hypothetical	fig|273384.19.peg.3145	BAUR9175_03190	1	BAUR9175	2353	CDS	FXZB01000026	3270	2353	-3	-	918	FIG00987435: Hypothetical protein	- none -
Hypothetical	fig|1703.46.peg.3449	CIK79_RS18000	9	CIK79	2190202	CDS	NZ_NRGX01000001	3950736	3949417	-3	-	1320	FIG01001418: Hypothetical protein	- none -
Hypothetical	fig|273384.15.peg.1386	BAURA86_01407	6	BAURA86	7090	CDS	FXZI01000004	7090	7794	1	+	705	FIG01038085: Hypothetical protein	- none -
Hypothetical	fig|273384.25.peg.529	CXR27_02765	5	CXR27	621282	CDS	CP025334	621282	623063	3	+	1782	FIG01049960: Hypothetical protein	- none -
Hypothetical	fig|273384.15.peg.546	BAURA86_00558	6	BAURA86	611578	CDS	FXZI01000001	611578	612402	1	+	825	FIG01056462: Hypothetical protein	- none -
Hypothetical	fig|1703.46.peg.162	CIK79_RS00860	9	CIK79	2762531	CDS	NZ_NRGX01000001	214587	211132	-3	-	3456	FIG01059430: Hypothetical protein	- none -
Hypothetical	fig|273384.21.peg.2962	CXR26_15535	4	CXR26	3359566	CDS	CP025332	3359566	3360117	1	+	552	FIG01136303: Hypothetical protein	- none -
Hypothetical	fig|273384.15.peg.3605	BAURA86_03654	6	BAURA86	24542	CDS	FXZI01000019	24542	25870	2	+	1329	FIG01160564: Hypothetical protein	- none -
Hypothetical	fig|1703.41.peg.2669	BLSMQ_RS13885	0	BLSMQ	3028209	CDS	NZ_CP017150	3028964	3028209	-2	-	756	FIG01193130: Hypothetical protein	- none -
Hypothetical	fig|273384.15.peg.1740	BAURA86_01768	6	BAURA86	130797	CDS	FXZI01000005	132077	130797	-2	-	1281	FIG014574: Hypothetical protein	CBSS-159087.4.peg.2189
Hypothetical	fig|273384.15.peg.900	BAURA86_00915	6	BAURA86	350164	CDS	FXZI01000002	350164	351462	1	+	1299	FIG014574: Hypothetical protein	CBSS-159087.4.peg.2189
Hypothetical	fig|273384.20.peg.2240	CXR25_11735	7	CXR25	2528883	CDS	CP025333	2530148	2528883	-2	-	1266	FIG036446: Hypothetical protein	Rad50-Mre11 DNA repair cluster
Hypothetical	fig|273384.16.peg.3445	BAURA63_03494	2	BAURA63	6281	CDS	FXYZ01000026	7219	6281	-1	-	939	Hypothetical plasmid protein	- none -
Hypothetical	fig|273384.19.peg.3740	BAUR9175_03793	1	BAUR9175	1	CDS	FXZB01000054	1	276	1	+	276	Hypothetical protein	- none -
Hypothetical	fig|273384.19.peg.3650	BAUR9175_03700	1	BAUR9175	1	CDS	FXZB01000044	1	591	1	+	591	Hypothetical protein	- none -
Hypothetical	fig|273384.19.peg.3717	BAUR9175_03767	1	BAUR9175	3	CDS	FXZB01000050	452	3	-2	-	450	Hypothetical protein	- none -
Hypothetical	fig|273384.19.peg.3750	BAUR9175_03804	1	BAUR9175	3	CDS	FXZB01000057	3	1268	3	+	1266	Hypothetical protein	- none -
Hypothetical	fig|273384.19.peg.3401	BAUR9175_03446	1	BAUR9175	245	CDS	FXZB01000033	415	245	-1	-	171	Hypothetical protein	- none -
Hypothetical	fig|273384.19.peg.3751	BAUR9175_03805	1	BAUR9175	1341	CDS	FXZB01000057	1341	1922	3	+	582	Hypothetical protein	- none -
Hypothetical	fig|273384.19.peg.3737	BAUR9175_03790	1	BAUR9175	3544	CDS	FXZB01000053	3678	3544	-3	-	135	Hypothetical protein	- none -
Hypothetical	fig|273384.19.peg.3653	BAUR9175_03703	1	BAUR9175	3600	CDS	FXZB01000044	5315	3600	-2	-	1716	Hypothetical protein	- none -
Hypothetical	fig|273384.19.peg.3738	BAUR9175_03791	1	BAUR9175	3671	CDS	FXZB01000053	3937	3671	-1	-	267	Hypothetical protein	- none -
Hypothetical	fig|273384.19.peg.3229	BAUR9175_03274	1	BAUR9175	3769	CDS	FXZB01000028	3960	3769	-3	-	192	Hypothetical protein	- none -
Hypothetical	fig|273384.19.peg.3554	BAUR9175_03604	1	BAUR9175	4810	CDS	FXZB01000039	5448	4810	-3	-	639	Hypothetical protein	- none -
Hypothetical	fig|273384.19.peg.3149	BAUR9175_03194	1	BAUR9175	7093	CDS	FXZB01000026	7551	7093	-3	-	459	Hypothetical protein	- none -
Hypothetical	fig|273384.19.peg.3487	BAUR9175_03535	1	BAUR9175	7395	CDS	FXZB01000036	7395	7556	3	+	162	Hypothetical protein	- none -
Hypothetical	fig|273384.19.peg.320	BAUR9175_00327	1	BAUR9175	7874	CDS	FXZB01000002	8422	7874	-1	-	549	Hypothetical protein	- none -
Hypothetical	fig|273384.19.peg.321	BAUR9175_00328	1	BAUR9175	8440	CDS	FXZB01000002	8440	8595	1	+	156	Hypothetical protein	- none -
Hypothetical	fig|273384.19.peg.3559	BAUR9175_03609	1	BAUR9175	10148	CDS	FXZB01000039	10148	10435	2	+	288	Hypothetical protein	- none -
Hypothetical	fig|273384.19.peg.3101	BAUR9175_03146	1	BAUR9175	11634	CDS	FXZB01000025	11870	11634	-2	-	237	Hypothetical protein	- none -
Hypothetical	fig|273384.19.peg.3561	BAUR9175_03611	1	BAUR9175	12218	CDS	FXZB01000039	12218	12949	2	+	732	Hypothetical protein	- none -
Hypothetical	fig|273384.19.peg.3684	BAUR9175_03734	1	BAUR9175	13261	CDS	FXZB01000045	13671	13261	-3	-	411	Hypothetical protein	- none -
Hypothetical	fig|273384.19.peg.3563	BAUR9175_03613	1	BAUR9175	13792	CDS	FXZB01000039	14022	13792	-3	-	231	Hypothetical protein	- none -
Hypothetical	fig|273384.19.peg.3664	BAUR9175_03714	1	BAUR9175	16653	CDS	FXZB01000044	16653	16814	3	+	162	Hypothetical protein	- none -
Hypothetical	fig|273384.19.peg.3568	BAUR9175_03618	1	BAUR9175	19116	CDS	FXZB01000039	19529	19116	-2	-	414	Hypothetical protein	- none -
Hypothetical	fig|273384.19.peg.3388	BAUR9175_03433	1	BAUR9175	20832	CDS	FXZB01000032	20832	21134	3	+	303	Hypothetical protein	- none -
Hypothetical	fig|273384.19.peg.3243	BAUR9175_03288	1	BAUR9175	21525	CDS	FXZB01000028	21644	21525	-2	-	120	Hypothetical protein	- none -
Hypothetical	fig|273384.19.peg.3390	BAUR9175_03435	1	BAUR9175	23205	CDS	FXZB01000032	23205	23969	3	+	765	Hypothetical protein	- none -
Hypothetical	fig|273384.19.peg.2929	BAUR9175_02969	1	BAUR9175	23459	CDS	FXZB01000022	23459	23692	2	+	234	Hypothetical protein	- none -
Hypothetical	fig|273384.19.peg.2931	BAUR9175_02971	1	BAUR9175	24544	CDS	FXZB01000022	25557	24544	-3	-	1014	Hypothetical protein	- none -
Hypothetical	fig|273384.19.peg.2932	BAUR9175_02972	1	BAUR9175	25814	CDS	FXZB01000022	25814	26302	2	+	489	Hypothetical protein	- none -
Hypothetical	fig|273384.19.peg.337	BAUR9175_00344	1	BAUR9175	26319	CDS	FXZB01000002	26319	26897	3	+	579	Hypothetical protein	- none -
Hypothetical	fig|273384.19.peg.2934	BAUR9175_02974	1	BAUR9175	26712	CDS	FXZB01000022	26712	27362	3	+	651	Hypothetical protein	- none -
Hypothetical	fig|273384.19.peg.3215	BAUR9175_03260	1	BAUR9175	27071	CDS	FXZB01000027	27071	28261	2	+	1191	Hypothetical protein	- none -
Hypothetical	fig|273384.19.peg.2936	BAUR9175_02976	1	BAUR9175	28280	CDS	FXZB01000022	28280	28519	2	+	240	Hypothetical protein	- none -
Hypothetical	fig|273384.19.peg.2937	BAUR9175_02977	1	BAUR9175	28403	CDS	FXZB01000022	28972	28403	-1	-	570	Hypothetical protein	- none -
Hypothetical	fig|273384.19.peg.2938	BAUR9175_02978	1	BAUR9175	28939	CDS	FXZB01000022	30051	28939	-3	-	1113	Hypothetical protein	- none -
Hypothetical	fig|273384.19.peg.2690	BAUR9175_02726	1	BAUR9175	32438	CDS	FXZB01000019	32438	32959	2	+	522	Hypothetical protein	- none -
Hypothetical	fig|273384.19.peg.2942	BAUR9175_02982	1	BAUR9175	36259	CDS	FXZB01000022	36259	36570	1	+	312	Hypothetical protein	- none -
Hypothetical	fig|273384.19.peg.2943	BAUR9175_02983	1	BAUR9175	36834	CDS	FXZB01000022	36834	37502	3	+	669	Hypothetical protein	- none -
Hypothetical	fig|273384.19.peg.2944	BAUR9175_02984	1	BAUR9175	37603	CDS	FXZB01000022	37603	37911	1	+	309	Hypothetical protein	- none -
Hypothetical	fig|273384.19.peg.2946	BAUR9175_02986	1	BAUR9175	38839	CDS	FXZB01000022	38839	39021	1	+	183	Hypothetical protein	- none -
Hypothetical	fig|273384.19.peg.2947	BAUR9175_02987	1	BAUR9175	39024	CDS	FXZB01000022	39024	39263	3	+	240	Hypothetical protein	- none -
Hypothetical	fig|273384.19.peg.2949	BAUR9175_02989	1	BAUR9175	39606	CDS	FXZB01000022	39606	40559	3	+	954	Hypothetical protein	- none -
Hypothetical	fig|273384.19.peg.2951	BAUR9175_02991	1	BAUR9175	42411	CDS	FXZB01000022	43100	42411	-2	-	690	Hypothetical protein	- none -
Hypothetical	fig|273384.19.peg.2161	BAUR9175_02191	1	BAUR9175	45235	CDS	FXZB01000014	45235	45885	1	+	651	Hypothetical protein	- none -
Hypothetical	fig|273384.19.peg.2162	BAUR9175_02192	1	BAUR9175	45882	CDS	FXZB01000014	45882	46859	3	+	978	Hypothetical protein	- none -
Hypothetical	fig|273384.19.peg.2954	BAUR9175_02994	1	BAUR9175	46421	CDS	FXZB01000022	46741	46421	-1	-	321	Hypothetical protein	- none -
Hypothetical	fig|273384.19.peg.762	BAUR9175_00776	1	BAUR9175	49447	CDS	FXZB01000004	49447	49716	1	+	270	Hypothetical protein	- none -
Hypothetical	fig|273384.19.peg.3136	BAUR9175_03181	1	BAUR9175	52393	CDS	FXZB01000025	52671	52393	-3	-	279	Hypothetical protein	- none -
Hypothetical	fig|273384.19.peg.3034	BAUR9175_03079	1	BAUR9175	58119	CDS	FXZB01000023	58301	58119	-2	-	183	Hypothetical protein	- none -
Hypothetical	fig|273384.19.peg.3035	BAUR9175_03080	1	BAUR9175	58380	CDS	FXZB01000023	58541	58380	-2	-	162	Hypothetical protein	- none -
Hypothetical	fig|273384.19.peg.3036	BAUR9175_03081	1	BAUR9175	58534	CDS	FXZB01000023	58740	58534	-3	-	207	Hypothetical protein	- none -
Hypothetical	fig|273384.19.peg.3038	BAUR9175_03083	1	BAUR9175	60255	CDS	FXZB01000023	60569	60255	-2	-	315	Hypothetical protein	- none -
Hypothetical	fig|273384.19.peg.584	BAUR9175_00595	1	BAUR9175	66952	CDS	FXZB01000003	67191	66952	-3	-	240	Hypothetical protein	- none -
Hypothetical	fig|273384.19.peg.2904	BAUR9175_02943	1	BAUR9175	72085	CDS	FXZB01000021	72085	73227	1	+	1143	Hypothetical protein	- none -
Hypothetical	fig|273384.19.peg.2747	BAUR9175_02783	1	BAUR9175	90394	CDS	FXZB01000019	90394	91242	1	+	849	Hypothetical protein	- none -
Hypothetical	fig|273384.19.peg.2418	BAUR9175_02449	1	BAUR9175	91338	CDS	FXZB01000016	91338	91691	3	+	354	Hypothetical protein	- none -
Hypothetical	fig|273384.19.peg.2419	BAUR9175_02450	1	BAUR9175	91693	CDS	FXZB01000016	91693	92055	1	+	363	Hypothetical protein	- none -
Hypothetical	fig|273384.19.peg.2420	BAUR9175_02451	1	BAUR9175	92055	CDS	FXZB01000016	92055	92204	3	+	150	Hypothetical protein	- none -
Hypothetical	fig|273384.19.peg.2422	BAUR9175_02453	1	BAUR9175	93697	CDS	FXZB01000016	93697	93855	1	+	159	Hypothetical protein	- none -
Hypothetical	fig|273384.19.peg.2211	BAUR9175_02242	1	BAUR9175	108630	CDS	FXZB01000014	109289	108630	-2	-	660	Hypothetical protein	- none -
Hypothetical	fig|273384.19.peg.2212	BAUR9175_02243	1	BAUR9175	109489	CDS	FXZB01000014	109644	109489	-3	-	156	Hypothetical protein	- none -
Hypothetical	fig|273384.19.peg.2334	BAUR9175_02365	1	BAUR9175	120848	CDS	FXZB01000015	120848	123160	2	+	2313	Hypothetical protein	- none -
Hypothetical	fig|273384.19.peg.1004	BAUR9175_01021	1	BAUR9175	166088	CDS	FXZB01000005	166447	166088	-1	-	360	Hypothetical protein	- none -
Hypothetical	fig|273384.19.peg.1009	BAUR9175_01026	1	BAUR9175	169627	CDS	FXZB01000005	169627	169878	1	+	252	Hypothetical protein	- none -
Hypothetical	fig|273384.19.peg.709	BAUR9175_00722	1	BAUR9175	201266	CDS	FXZB01000003	201266	201949	2	+	684	Hypothetical protein	- none -
Hypothetical	fig|273384.19.peg.221	BAUR9175_00227	1	BAUR9175	252011	CDS	FXZB01000001	252011	252295	2	+	285	Hypothetical protein	- none -
Hypothetical	fig|273384.17.peg.3607	BAUR920_03662	8	BAUR920	181	CDS	FXZG01000071	570	181	-3	-	390	Hypothetical protein	- none -
Hypothetical	fig|273384.17.peg.3559	BAUR920_03613	8	BAUR920	200	CDS	FXZG01000047	200	439	2	+	240	Hypothetical protein	- none -
Hypothetical	fig|273384.17.peg.3524	BAUR920_03574	8	BAUR920	290	CDS	FXZG01000041	1027	290	-1	-	738	Hypothetical protein	- none -
Hypothetical	fig|273384.17.peg.3605	BAUR920_03660	8	BAUR920	440	CDS	FXZG01000070	440	850	2	+	411	Hypothetical protein	- none -
Hypothetical	fig|273384.17.peg.3227	BAUR920_03274	8	BAUR920	465	CDS	FXZG01000027	465	617	3	+	153	Hypothetical protein	- none -
Hypothetical	fig|273384.17.peg.3599	BAUR920_03654	8	BAUR920	677	CDS	FXZG01000065	1108	677	-1	-	432	Hypothetical protein	- none -
Hypothetical	fig|273384.17.peg.3608	BAUR920_03663	8	BAUR920	773	CDS	FXZG01000071	1105	773	-1	-	333	Hypothetical protein	- none -
Hypothetical	fig|273384.17.peg.3606	BAUR920_03661	8	BAUR920	878	CDS	FXZG01000070	878	1072	2	+	195	Hypothetical protein	- none -
Hypothetical	fig|273384.17.peg.3525	BAUR920_03575	8	BAUR920	1024	CDS	FXZG01000041	1581	1024	-3	-	558	Hypothetical protein	- none -
Hypothetical	fig|273384.17.peg.2631	BAUR920_02672	8	BAUR920	1170	CDS	FXZG01000017	1298	1170	-2	-	129	Hypothetical protein	- none -
Hypothetical	fig|273384.17.peg.2632	BAUR920_02673	8	BAUR920	1421	CDS	FXZG01000017	1549	1421	-1	-	129	Hypothetical protein	- none -
Hypothetical	fig|273384.17.peg.3584	BAUR920_03638	8	BAUR920	1644	CDS	FXZG01000055	1808	1644	-2	-	165	Hypothetical protein	- none -
Hypothetical	fig|273384.17.peg.3477	BAUR920_03525	8	BAUR920	2451	CDS	FXZG01000037	2451	2852	3	+	402	Hypothetical protein	- none -
Hypothetical	fig|273384.17.peg.3058	BAUR920_03104	8	BAUR920	4200	CDS	FXZG01000023	4200	4403	3	+	204	Hypothetical protein	- none -
Hypothetical	fig|273384.17.peg.2440	BAUR920_02481	8	BAUR920	5439	CDS	FXZG01000015	5439	5885	3	+	447	Hypothetical protein	- none -
Hypothetical	fig|273384.17.peg.3322	BAUR920_03369	8	BAUR920	5684	CDS	FXZG01000030	5887	5684	-1	-	204	Hypothetical protein	- none -
Hypothetical	fig|273384.17.peg.3529	BAUR920_03579	8	BAUR920	5915	CDS	FXZG01000041	5915	6565	2	+	651	Hypothetical protein	- none -
Hypothetical	fig|273384.17.peg.3530	BAUR920_03580	8	BAUR920	6694	CDS	FXZG01000041	6694	7554	1	+	861	Hypothetical protein	- none -
Hypothetical	fig|273384.17.peg.2442	BAUR920_02483	8	BAUR920	6888	CDS	FXZG01000015	7184	6888	-2	-	297	Hypothetical protein	- none -
Hypothetical	fig|273384.17.peg.3531	BAUR920_03581	8	BAUR920	7860	CDS	FXZG01000041	7860	8942	3	+	1083	Hypothetical protein	- none -
Hypothetical	fig|273384.17.peg.2550	BAUR920_02591	8	BAUR920	8538	CDS	FXZG01000016	8538	9095	3	+	558	Hypothetical protein	- none -
Hypothetical	fig|273384.17.peg.2445	BAUR920_02486	8	BAUR920	8790	CDS	FXZG01000015	9164	8790	-2	-	375	Hypothetical protein	- none -
Hypothetical	fig|273384.17.peg.3327	BAUR920_03374	8	BAUR920	10198	CDS	FXZG01000030	10533	10198	-3	-	336	Hypothetical protein	- none -
Hypothetical	fig|273384.17.peg.3329	BAUR920_03376	8	BAUR920	12134	CDS	FXZG01000030	12583	12134	-1	-	450	Hypothetical protein	- none -
Hypothetical	fig|273384.17.peg.2554	BAUR920_02595	8	BAUR920	12496	CDS	FXZG01000016	12669	12496	-3	-	174	Hypothetical protein	- none -
Hypothetical	fig|273384.17.peg.2449	BAUR920_02490	8	BAUR920	12978	CDS	FXZG01000015	13130	12978	-2	-	153	Hypothetical protein	- none -
Hypothetical	fig|273384.17.peg.2450	BAUR920_02491	8	BAUR920	13127	CDS	FXZG01000015	13285	13127	-1	-	159	Hypothetical protein	- none -
Hypothetical	fig|273384.17.peg.3488	BAUR920_03536	8	BAUR920	13569	CDS	FXZG01000037	13569	14276	3	+	708	Hypothetical protein	- none -
Hypothetical	fig|273384.17.peg.3489	BAUR920_03537	8	BAUR920	14279	CDS	FXZG01000037	14279	14608	2	+	330	Hypothetical protein	- none -
Hypothetical	fig|273384.17.peg.3203	BAUR920_03250	8	BAUR920	14404	CDS	FXZG01000026	14404	15987	1	+	1584	Hypothetical protein	- none -
Hypothetical	fig|273384.17.peg.3332	BAUR920_03379	8	BAUR920	15675	CDS	FXZG01000030	15675	15854	3	+	180	Hypothetical protein	- none -
Hypothetical	fig|273384.17.peg.3408	BAUR920_03456	8	BAUR920	19188	CDS	FXZG01000033	19188	19331	3	+	144	Hypothetical protein	- none -
Hypothetical	fig|273384.17.peg.3209	BAUR920_03256	8	BAUR920	23090	CDS	FXZG01000026	23090	24760	2	+	1671	Hypothetical protein	- none -
Hypothetical	fig|273384.17.peg.3020	BAUR920_03064	8	BAUR920	26576	CDS	FXZG01000022	26908	26576	-1	-	333	Hypothetical protein	- none -
Hypothetical	fig|273384.17.peg.3211	BAUR920_03258	8	BAUR920	26698	CDS	FXZG01000026	28020	26698	-3	-	1323	Hypothetical protein	- none -
Hypothetical	fig|273384.17.peg.3022	BAUR920_03066	8	BAUR920	27153	CDS	FXZG01000022	27365	27153	-2	-	213	Hypothetical protein	- none -
Hypothetical	fig|273384.17.peg.3212	BAUR920_03259	8	BAUR920	28017	CDS	FXZG01000026	29192	28017	-2	-	1176	Hypothetical protein	- none -
Hypothetical	fig|273384.17.peg.2351	BAUR920_02391	8	BAUR920	28508	CDS	FXZG01000014	28508	28825	2	+	318	Hypothetical protein	- none -
Hypothetical	fig|273384.17.peg.1616	BAUR920_01644	8	BAUR920	32125	CDS	FXZG01000008	32298	32125	-3	-	174	Hypothetical protein	- none -
Hypothetical	fig|273384.17.peg.2820	BAUR920_02863	8	BAUR920	39051	CDS	FXZG01000019	39236	39051	-2	-	186	Hypothetical protein	- none -
Hypothetical	fig|273384.17.peg.1621	BAUR920_01649	8	BAUR920	39340	CDS	FXZG01000008	39340	39846	1	+	507	Hypothetical protein	- none -
Hypothetical	fig|273384.17.peg.1623	BAUR920_01651	8	BAUR920	41412	CDS	FXZG01000008	41412	42407	3	+	996	Hypothetical protein	- none -
Hypothetical	fig|273384.17.peg.1755	BAUR920_01783	8	BAUR920	44355	CDS	FXZG01000009	44355	45743	3	+	1389	Hypothetical protein	- none -
Hypothetical	fig|273384.17.peg.1756	BAUR920_01784	8	BAUR920	45850	CDS	FXZG01000009	45850	48576	1	+	2727	Hypothetical protein	- none -
Hypothetical	fig|273384.17.peg.2484	BAUR920_02525	8	BAUR920	46637	CDS	FXZG01000015	46870	46637	-1	-	234	Hypothetical protein	- none -
Hypothetical	fig|273384.17.peg.1758	BAUR920_01786	8	BAUR920	50077	CDS	FXZG01000009	50077	51693	1	+	1617	Hypothetical protein	- none -
Hypothetical	fig|273384.17.peg.3047	BAUR920_03092	8	BAUR920	51202	CDS	FXZG01000022	51357	51202	-3	-	156	Hypothetical protein	- none -
Hypothetical	fig|273384.17.peg.3107	BAUR920_03154	8	BAUR920	56302	CDS	FXZG01000023	56658	56302	-3	-	357	Hypothetical protein	- none -
Hypothetical	fig|273384.17.peg.3054	BAUR920_03100	8	BAUR920	57573	CDS	FXZG01000022	57809	57573	-2	-	237	Hypothetical protein	- none -
Hypothetical	fig|273384.17.peg.2771	BAUR920_02813	8	BAUR920	57828	CDS	FXZG01000018	57828	58562	3	+	735	Hypothetical protein	- none -
Hypothetical	fig|273384.17.peg.2774	BAUR920_02816	8	BAUR920	62865	CDS	FXZG01000018	62865	64046	3	+	1182	Hypothetical protein	- none -
Hypothetical	fig|273384.17.peg.2775	BAUR920_02817	8	BAUR920	64056	CDS	FXZG01000018	64056	66137	3	+	2082	Hypothetical protein	- none -
Hypothetical	fig|273384.17.peg.2776	BAUR920_02818	8	BAUR920	66137	CDS	FXZG01000018	66137	67771	2	+	1635	Hypothetical protein	- none -
Hypothetical	fig|273384.17.peg.2777	BAUR920_02819	8	BAUR920	67768	CDS	FXZG01000018	67768	67992	1	+	225	Hypothetical protein	- none -
Hypothetical	fig|273384.17.peg.2778	BAUR920_02820	8	BAUR920	68000	CDS	FXZG01000018	68000	68848	2	+	849	Hypothetical protein	- none -
Hypothetical	fig|273384.17.peg.1151	BAUR920_01176	8	BAUR920	90691	CDS	FXZG01000005	91011	90691	-3	-	321	Hypothetical protein	- none -
Hypothetical	fig|273384.17.peg.1153	BAUR920_01178	8	BAUR920	92446	CDS	FXZG01000005	93387	92446	-3	-	942	Hypothetical protein	- none -
Hypothetical	fig|273384.17.peg.387	BAUR920_00397	8	BAUR920	106619	CDS	FXZG01000002	107392	106619	-1	-	774	Hypothetical protein	- none -
Hypothetical	fig|273384.17.peg.389	BAUR920_00399	8	BAUR920	108104	CDS	FXZG01000002	108643	108104	-1	-	540	Hypothetical protein	- none -
Hypothetical	fig|273384.17.peg.1363	BAUR920_01390	8	BAUR920	124041	CDS	FXZG01000006	124041	124619	3	+	579	Hypothetical protein	- none -
Hypothetical	fig|273384.17.peg.2318	BAUR920_02358	8	BAUR920	129448	CDS	FXZG01000013	129448	130299	1	+	852	Hypothetical protein	- none -
Hypothetical	fig|273384.17.peg.1957	BAUR920_01985	8	BAUR920	132153	CDS	FXZG01000010	132449	132153	-2	-	297	Hypothetical protein	- none -
Hypothetical	fig|273384.17.peg.1960	BAUR920_01988	8	BAUR920	135036	CDS	FXZG01000010	135242	135036	-2	-	207	Hypothetical protein	- none -
Hypothetical	fig|273384.17.peg.1829	BAUR920_01857	8	BAUR920	137950	CDS	FXZG01000009	138717	137950	-3	-	768	Hypothetical protein	- none -
Hypothetical	fig|273384.17.peg.1836	BAUR920_01864	8	BAUR920	145506	CDS	FXZG01000009	146183	145506	-2	-	678	Hypothetical protein	- none -
Hypothetical	fig|273384.17.peg.1221	BAUR920_01246	8	BAUR920	166019	CDS	FXZG01000005	167251	166019	-1	-	1233	Hypothetical protein	- none -
Hypothetical	fig|273384.17.peg.1222	BAUR920_01247	8	BAUR920	167254	CDS	FXZG01000005	168222	167254	-3	-	969	Hypothetical protein	- none -
Hypothetical	fig|273384.17.peg.1404	BAUR920_01431	8	BAUR920	167690	CDS	FXZG01000006	167690	168925	2	+	1236	Hypothetical protein	- none -
Hypothetical	fig|273384.17.peg.450	BAUR920_00460	8	BAUR920	173503	CDS	FXZG01000002	174393	173503	-3	-	891	Hypothetical protein	- none -
Hypothetical	fig|273384.17.peg.1413	BAUR920_01440	8	BAUR920	177504	CDS	FXZG01000006	177504	178349	3	+	846	Hypothetical protein	- none -
Hypothetical	fig|273384.17.peg.281	BAUR920_00287	8	BAUR920	315897	CDS	FXZG01000001	316073	315897	-2	-	177	Hypothetical protein	- none -
Hypothetical	fig|273384.17.peg.283	BAUR920_00289	8	BAUR920	317095	CDS	FXZG01000001	320406	317095	-3	-	3312	Hypothetical protein	- none -
Hypothetical	fig|273384.17.peg.284	BAUR920_00290	8	BAUR920	320406	CDS	FXZG01000001	321083	320406	-2	-	678	Hypothetical protein	- none -
Hypothetical	fig|273384.17.peg.285	BAUR920_00291	8	BAUR920	322044	CDS	FXZG01000001	322044	322220	3	+	177	Hypothetical protein	- none -
Hypothetical	fig|273384.17.peg.286	BAUR920_00292	8	BAUR920	322541	CDS	FXZG01000001	322541	323692	2	+	1152	Hypothetical protein	- none -
Hypothetical	fig|273384.17.peg.287	BAUR920_00293	8	BAUR920	323791	CDS	FXZG01000001	323791	324090	1	+	300	Hypothetical protein	- none -
Hypothetical	fig|273384.17.peg.597	BAUR920_00610	8	BAUR920	331807	CDS	FXZG01000002	331807	331941	1	+	135	Hypothetical protein	- none -
Hypothetical	fig|273384.17.peg.598	BAUR920_00611	8	BAUR920	331962	CDS	FXZG01000002	331962	332483	3	+	522	Hypothetical protein	- none -
Hypothetical	fig|273384.16.peg.3788	BAURA63_03845	2	BAURA63	1	CDS	FXYZ01000076	174	1	-3	-	174	Hypothetical protein	- none -
Hypothetical	fig|273384.16.peg.3812	BAURA63_03869	2	BAURA63	1	CDS	FXYZ01000089	1044	1	-3	-	1044	Hypothetical protein	- none -
Hypothetical	fig|273384.16.peg.3813	BAURA63_03870	2	BAURA63	2	CDS	FXYZ01000090	2	1036	2	+	1035	Hypothetical protein	- none -
Hypothetical	fig|273384.16.peg.3680	BAURA63_03734	2	BAURA63	2	CDS	FXYZ01000042	1966	2	-1	-	1965	Hypothetical protein	- none -
Hypothetical	fig|273384.16.peg.3773	BAURA63_03830	2	BAURA63	3	CDS	FXYZ01000069	3	146	3	+	144	Hypothetical protein	- none -
Hypothetical	fig|273384.16.peg.2272	BAURA63_02303	2	BAURA63	3	CDS	FXYZ01000009	152	3	-2	-	150	Hypothetical protein	- none -
Hypothetical	fig|273384.16.peg.3809	BAURA63_03866	2	BAURA63	3	CDS	FXYZ01000088	125	3	-2	-	123	Hypothetical protein	- none -
Hypothetical	fig|273384.16.peg.3781	BAURA63_03838	2	BAURA63	100	CDS	FXYZ01000073	100	624	1	+	525	Hypothetical protein	- none -
Hypothetical	fig|273384.16.peg.3769	BAURA63_03826	2	BAURA63	161	CDS	FXYZ01000067	161	382	2	+	222	Hypothetical protein	- none -
Hypothetical	fig|273384.16.peg.3810	BAURA63_03867	2	BAURA63	322	CDS	FXYZ01000088	522	322	-3	-	201	Hypothetical protein	- none -
Hypothetical	fig|273384.16.peg.3613	BAURA63_03665	2	BAURA63	485	CDS	FXYZ01000035	485	625	2	+	141	Hypothetical protein	- none -
Hypothetical	fig|273384.16.peg.3800	BAURA63_03857	2	BAURA63	547	CDS	FXYZ01000082	951	547	-3	-	405	Hypothetical protein	- none -
Hypothetical	fig|273384.16.peg.3789	BAURA63_03846	2	BAURA63	592	CDS	FXYZ01000076	1305	592	-3	-	714	Hypothetical protein	- none -
Hypothetical	fig|273384.16.peg.3804	BAURA63_03861	2	BAURA63	754	CDS	FXYZ01000085	1122	754	-3	-	369	Hypothetical protein	- none -
Hypothetical	fig|273384.16.peg.3786	BAURA63_03843	2	BAURA63	945	CDS	FXYZ01000074	945	1127	3	+	183	Hypothetical protein	- none -
Hypothetical	fig|273384.16.peg.3225	BAURA63_03274	2	BAURA63	1037	CDS	FXYZ01000020	1037	1405	2	+	369	Hypothetical protein	- none -
Hypothetical	fig|273384.16.peg.3794	BAURA63_03851	2	BAURA63	1053	CDS	FXYZ01000079	1247	1053	-2	-	195	Hypothetical protein	- none -
Hypothetical	fig|273384.16.peg.3645	BAURA63_03697	2	BAURA63	1218	CDS	FXYZ01000038	1218	1424	3	+	207	Hypothetical protein	- none -
Hypothetical	fig|273384.16.peg.3776	BAURA63_03833	2	BAURA63	1469	CDS	FXYZ01000069	1469	1621	2	+	153	Hypothetical protein	- none -
Hypothetical	fig|273384.16.peg.3707	BAURA63_03761	2	BAURA63	1568	CDS	FXYZ01000047	2146	1568	-1	-	579	Hypothetical protein	- none -
Hypothetical	fig|273384.16.peg.3606	BAURA63_03658	2	BAURA63	1663	CDS	FXYZ01000034	2898	1663	-3	-	1236	Hypothetical protein	- none -
Hypothetical	fig|273384.16.peg.3646	BAURA63_03698	2	BAURA63	1710	CDS	FXYZ01000038	1710	2096	3	+	387	Hypothetical protein	- none -
Hypothetical	fig|273384.16.peg.3687	BAURA63_03741	2	BAURA63	1740	CDS	FXYZ01000043	3368	1740	-2	-	1629	Hypothetical protein	- none -
Hypothetical	fig|273384.16.peg.2524	BAURA63_02562	2	BAURA63	1763	CDS	FXYZ01000011	1763	1954	2	+	192	Hypothetical protein	- none -
Hypothetical	fig|273384.16.peg.3358	BAURA63_03407	2	BAURA63	1861	CDS	FXYZ01000023	2040	1861	-3	-	180	Hypothetical protein	- none -
Hypothetical	fig|273384.16.peg.3703	BAURA63_03757	2	BAURA63	1885	CDS	FXYZ01000046	1885	2439	1	+	555	Hypothetical protein	- none -
Hypothetical	fig|273384.16.peg.3708	BAURA63_03762	2	BAURA63	2143	CDS	FXYZ01000047	4728	2143	-3	-	2586	Hypothetical protein	- none -
Hypothetical	fig|273384.16.peg.3722	BAURA63_03776	2	BAURA63	2422	CDS	FXYZ01000050	2422	3042	1	+	621	Hypothetical protein	- none -
Hypothetical	fig|273384.16.peg.2525	BAURA63_02563	2	BAURA63	2496	CDS	FXYZ01000011	3014	2496	-2	-	519	Hypothetical protein	- none -
Hypothetical	fig|273384.16.peg.3439	BAURA63_03488	2	BAURA63	2638	CDS	FXYZ01000026	2853	2638	-3	-	216	Hypothetical protein	- none -
Hypothetical	fig|273384.16.peg.3616	BAURA63_03668	2	BAURA63	2939	CDS	FXYZ01000035	3529	2939	-1	-	591	Hypothetical protein	- none -
Hypothetical	fig|273384.16.peg.3274	BAURA63_03323	2	BAURA63	2944	CDS	FXYZ01000021	3720	2944	-3	-	777	Hypothetical protein	- none -
Hypothetical	fig|273384.16.peg.2526	BAURA63_02564	2	BAURA63	2995	CDS	FXYZ01000011	3933	2995	-3	-	939	Hypothetical protein	- none -
Hypothetical	fig|273384.16.peg.3440	BAURA63_03489	2	BAURA63	3111	CDS	FXYZ01000026	3323	3111	-2	-	213	Hypothetical protein	- none -
Hypothetical	fig|273384.16.peg.3688	BAURA63_03742	2	BAURA63	3458	CDS	FXYZ01000043	4954	3458	-1	-	1497	Hypothetical protein	- none -
Hypothetical	fig|273384.16.peg.3441	BAURA63_03490	2	BAURA63	3852	CDS	FXYZ01000026	3852	4568	3	+	717	Hypothetical protein	- none -
Hypothetical	fig|273384.16.peg.3727	BAURA63_03781	2	BAURA63	3954	CDS	FXYZ01000051	3954	4373	3	+	420	Hypothetical protein	- none -
Hypothetical	fig|273384.16.peg.2527	BAURA63_02565	2	BAURA63	4079	CDS	FXYZ01000011	4204	4079	-1	-	126	Hypothetical protein	- none -
Hypothetical	fig|273384.16.peg.3648	BAURA63_03700	2	BAURA63	4121	CDS	FXYZ01000038	4121	4744	2	+	624	Hypothetical protein	- none -
Hypothetical	fig|273384.16.peg.3081	BAURA63_03130	2	BAURA63	4256	CDS	FXYZ01000017	4256	6208	2	+	1953	Hypothetical protein	- none -
Hypothetical	fig|273384.16.peg.3442	BAURA63_03491	2	BAURA63	4670	CDS	FXYZ01000026	4918	4670	-1	-	249	Hypothetical protein	- none -
Hypothetical	fig|273384.16.peg.3649	BAURA63_03701	2	BAURA63	4885	CDS	FXYZ01000038	4885	5787	1	+	903	Hypothetical protein	- none -
Hypothetical	fig|273384.16.peg.3443	BAURA63_03492	2	BAURA63	5201	CDS	FXYZ01000026	5710	5201	-1	-	510	Hypothetical protein	- none -
Hypothetical	fig|273384.16.peg.3444	BAURA63_03493	2	BAURA63	5707	CDS	FXYZ01000026	6159	5707	-3	-	453	Hypothetical protein	- none -
Hypothetical	fig|273384.16.peg.3650	BAURA63_03702	2	BAURA63	5787	CDS	FXYZ01000038	5787	6617	3	+	831	Hypothetical protein	- none -
Hypothetical	fig|273384.16.peg.2529	BAURA63_02567	2	BAURA63	5899	CDS	FXYZ01000011	7626	5899	-3	-	1728	Hypothetical protein	- none -
Hypothetical	fig|273384.16.peg.3082	BAURA63_03131	2	BAURA63	6205	CDS	FXYZ01000017	6771	6205	-3	-	567	Hypothetical protein	- none -
Hypothetical	fig|273384.16.peg.3446	BAURA63_03495	2	BAURA63	7452	CDS	FXYZ01000026	7452	8093	3	+	642	Hypothetical protein	- none -
Hypothetical	fig|273384.16.peg.3610	BAURA63_03662	2	BAURA63	7493	CDS	FXYZ01000034	9595	7493	-1	-	2103	Hypothetical protein	- none -
Hypothetical	fig|273384.16.peg.3447	BAURA63_03496	2	BAURA63	8150	CDS	FXYZ01000026	8353	8150	-1	-	204	Hypothetical protein	- none -
Hypothetical	fig|273384.16.peg.3277	BAURA63_03326	2	BAURA63	8360	CDS	FXYZ01000021	8752	8360	-1	-	393	Hypothetical protein	- none -
Hypothetical	fig|273384.16.peg.3448	BAURA63_03497	2	BAURA63	8696	CDS	FXYZ01000026	8932	8696	-1	-	237	Hypothetical protein	- none -
Hypothetical	fig|273384.16.peg.3278	BAURA63_03327	2	BAURA63	8755	CDS	FXYZ01000021	9060	8755	-3	-	306	Hypothetical protein	- none -
Hypothetical	fig|273384.16.peg.3449	BAURA63_03498	2	BAURA63	9196	CDS	FXYZ01000026	9522	9196	-3	-	327	Hypothetical protein	- none -
Hypothetical	fig|273384.16.peg.3450	BAURA63_03499	2	BAURA63	9582	CDS	FXYZ01000026	10070	9582	-2	-	489	Hypothetical protein	- none -
Hypothetical	fig|273384.16.peg.3611	BAURA63_03663	2	BAURA63	9592	CDS	FXYZ01000034	11415	9592	-3	-	1824	Hypothetical protein	- none -
Hypothetical	fig|273384.16.peg.3232	BAURA63_03281	2	BAURA63	9604	CDS	FXYZ01000020	9798	9604	-3	-	195	Hypothetical protein	- none -
Hypothetical	fig|273384.16.peg.3451	BAURA63_03500	2	BAURA63	10235	CDS	FXYZ01000026	10235	10618	2	+	384	Hypothetical protein	- none -
Hypothetical	fig|273384.16.peg.2402	BAURA63_02436	2	BAURA63	10442	CDS	FXYZ01000010	10960	10442	-1	-	519	Hypothetical protein	- none -
Hypothetical	fig|273384.16.peg.3452	BAURA63_03501	2	BAURA63	10746	CDS	FXYZ01000026	11102	10746	-2	-	357	Hypothetical protein	- none -
Hypothetical	fig|273384.16.peg.2403	BAURA63_02437	2	BAURA63	11002	CDS	FXYZ01000010	11002	11139	1	+	138	Hypothetical protein	- none -
Hypothetical	fig|273384.16.peg.3453	BAURA63_03502	2	BAURA63	11134	CDS	FXYZ01000026	12864	11134	-3	-	1731	Hypothetical protein	- none -
Hypothetical	fig|273384.16.peg.3454	BAURA63_03503	2	BAURA63	13144	CDS	FXYZ01000026	13476	13144	-3	-	333	Hypothetical protein	- none -
Hypothetical	fig|273384.16.peg.3530	BAURA63_03579	2	BAURA63	13422	CDS	FXYZ01000029	14024	13422	-2	-	603	Hypothetical protein	- none -
Hypothetical	fig|273384.16.peg.3455	BAURA63_03504	2	BAURA63	13570	CDS	FXYZ01000026	13965	13570	-3	-	396	Hypothetical protein	- none -
Hypothetical	fig|273384.16.peg.2407	BAURA63_02441	2	BAURA63	13665	CDS	FXYZ01000010	13665	13931	3	+	267	Hypothetical protein	- none -
Hypothetical	fig|273384.16.peg.3456	BAURA63_03505	2	BAURA63	14086	CDS	FXYZ01000026	14400	14086	-3	-	315	Hypothetical protein	- none -
Hypothetical	fig|273384.16.peg.3457	BAURA63_03506	2	BAURA63	14459	CDS	FXYZ01000026	14815	14459	-1	-	357	Hypothetical protein	- none -
Hypothetical	fig|273384.16.peg.3458	BAURA63_03507	2	BAURA63	14941	CDS	FXYZ01000026	15144	14941	-3	-	204	Hypothetical protein	- none -
Hypothetical	fig|273384.16.peg.3459	BAURA63_03508	2	BAURA63	15227	CDS	FXYZ01000026	15502	15227	-1	-	276	Hypothetical protein	- none -
Hypothetical	fig|273384.16.peg.3460	BAURA63_03509	2	BAURA63	15663	CDS	FXYZ01000026	16106	15663	-2	-	444	Hypothetical protein	- none -
Hypothetical	fig|273384.16.peg.2538	BAURA63_02576	2	BAURA63	16959	CDS	FXYZ01000011	17600	16959	-2	-	642	Hypothetical protein	- none -
Hypothetical	fig|273384.16.peg.3463	BAURA63_03512	2	BAURA63	18094	CDS	FXYZ01000026	18366	18094	-3	-	273	Hypothetical protein	- none -
Hypothetical	fig|273384.16.peg.3464	BAURA63_03513	2	BAURA63	18370	CDS	FXYZ01000026	18618	18370	-3	-	249	Hypothetical protein	- none -
Hypothetical	fig|273384.16.peg.3559	BAURA63_03611	2	BAURA63	18392	CDS	FXYZ01000030	18392	18553	2	+	162	Hypothetical protein	- none -
Hypothetical	fig|273384.16.peg.3465	BAURA63_03514	2	BAURA63	18730	CDS	FXYZ01000026	19281	18730	-3	-	552	Hypothetical protein	- none -
Hypothetical	fig|273384.16.peg.3466	BAURA63_03515	2	BAURA63	19382	CDS	FXYZ01000026	19642	19382	-1	-	261	Hypothetical protein	- none -
Hypothetical	fig|273384.16.peg.3467	BAURA63_03516	2	BAURA63	19787	CDS	FXYZ01000026	20101	19787	-1	-	315	Hypothetical protein	- none -
Hypothetical	fig|273384.16.peg.3468	BAURA63_03517	2	BAURA63	20226	CDS	FXYZ01000026	20564	20226	-2	-	339	Hypothetical protein	- none -
Hypothetical	fig|273384.16.peg.524	BAURA63_00531	2	BAURA63	20265	CDS	FXYZ01000002	20441	20265	-2	-	177	Hypothetical protein	- none -
Hypothetical	fig|273384.16.peg.3469	BAURA63_03518	2	BAURA63	20623	CDS	FXYZ01000026	20967	20623	-3	-	345	Hypothetical protein	- none -
Hypothetical	fig|273384.16.peg.3470	BAURA63_03519	2	BAURA63	21150	CDS	FXYZ01000026	21512	21150	-2	-	363	Hypothetical protein	- none -
Hypothetical	fig|273384.16.peg.526	BAURA63_00533	2	BAURA63	21675	CDS	FXYZ01000002	22646	21675	-2	-	972	Hypothetical protein	- none -
Hypothetical	fig|273384.16.peg.3471	BAURA63_03520	2	BAURA63	21696	CDS	FXYZ01000026	22241	21696	-2	-	546	Hypothetical protein	- none -
Hypothetical	fig|273384.16.peg.3472	BAURA63_03521	2	BAURA63	22238	CDS	FXYZ01000026	22777	22238	-1	-	540	Hypothetical protein	- none -
Hypothetical	fig|273384.16.peg.3473	BAURA63_03522	2	BAURA63	22856	CDS	FXYZ01000026	23149	22856	-1	-	294	Hypothetical protein	- none -
Hypothetical	fig|273384.16.peg.3095	BAURA63_03144	2	BAURA63	23001	CDS	FXYZ01000017	23001	23522	3	+	522	Hypothetical protein	- none -
Hypothetical	fig|273384.16.peg.3474	BAURA63_03523	2	BAURA63	23302	CDS	FXYZ01000026	23580	23302	-3	-	279	Hypothetical protein	- none -
Hypothetical	fig|273384.16.peg.3096	BAURA63_03145	2	BAURA63	23558	CDS	FXYZ01000017	23797	23558	-1	-	240	Hypothetical protein	- none -
Hypothetical	fig|273384.16.peg.3475	BAURA63_03524	2	BAURA63	23698	CDS	FXYZ01000026	24243	23698	-3	-	546	Hypothetical protein	- none -
Hypothetical	fig|273384.16.peg.3097	BAURA63_03146	2	BAURA63	23794	CDS	FXYZ01000017	24018	23794	-3	-	225	Hypothetical protein	- none -
Hypothetical	fig|273384.16.peg.3098	BAURA63_03147	2	BAURA63	24015	CDS	FXYZ01000017	24950	24015	-2	-	936	Hypothetical protein	- none -
Hypothetical	fig|273384.16.peg.3476	BAURA63_03525	2	BAURA63	24420	CDS	FXYZ01000026	24842	24420	-2	-	423	Hypothetical protein	- none -
Hypothetical	fig|273384.16.peg.3477	BAURA63_03526	2	BAURA63	25016	CDS	FXYZ01000026	25360	25016	-1	-	345	Hypothetical protein	- none -
Hypothetical	fig|273384.16.peg.3478	BAURA63_03527	2	BAURA63	25403	CDS	FXYZ01000026	25954	25403	-1	-	552	Hypothetical protein	- none -
Hypothetical	fig|273384.16.peg.3100	BAURA63_03149	2	BAURA63	25949	CDS	FXYZ01000017	26500	25949	-1	-	552	Hypothetical protein	- none -
Hypothetical	fig|273384.16.peg.3479	BAURA63_03528	2	BAURA63	26221	CDS	FXYZ01000026	26221	26424	1	+	204	Hypothetical protein	- none -
Hypothetical	fig|273384.16.peg.3480	BAURA63_03529	2	BAURA63	26568	CDS	FXYZ01000026	26568	27038	3	+	471	Hypothetical protein	- none -
Hypothetical	fig|273384.16.peg.3102	BAURA63_03151	2	BAURA63	29331	CDS	FXYZ01000017	29774	29331	-2	-	444	Hypothetical protein	- none -
Hypothetical	fig|273384.16.peg.3105	BAURA63_03154	2	BAURA63	30588	CDS	FXYZ01000017	30848	30588	-2	-	261	Hypothetical protein	- none -
Hypothetical	fig|273384.16.peg.3384	BAURA63_03433	2	BAURA63	34075	CDS	FXYZ01000023	34284	34075	-3	-	210	Hypothetical protein	- none -
Hypothetical	fig|273384.16.peg.3109	BAURA63_03158	2	BAURA63	34184	CDS	FXYZ01000017	35008	34184	-1	-	825	Hypothetical protein	- none -
Hypothetical	fig|273384.16.peg.3111	BAURA63_03160	2	BAURA63	35700	CDS	FXYZ01000017	36389	35700	-2	-	690	Hypothetical protein	- none -
Hypothetical	fig|273384.16.peg.3113	BAURA63_03162	2	BAURA63	37754	CDS	FXYZ01000017	38542	37754	-1	-	789	Hypothetical protein	- none -
Hypothetical	fig|273384.16.peg.3114	BAURA63_03163	2	BAURA63	38784	CDS	FXYZ01000017	38784	39119	3	+	336	Hypothetical protein	- none -
Hypothetical	fig|273384.16.peg.3116	BAURA63_03165	2	BAURA63	40262	CDS	FXYZ01000017	40262	40603	2	+	342	Hypothetical protein	- none -
Hypothetical	fig|273384.16.peg.3117	BAURA63_03166	2	BAURA63	40600	CDS	FXYZ01000017	40600	41193	1	+	594	Hypothetical protein	- none -
Hypothetical	fig|273384.16.peg.3118	BAURA63_03167	2	BAURA63	41197	CDS	FXYZ01000017	41197	43785	1	+	2589	Hypothetical protein	- none -
Hypothetical	fig|273384.16.peg.3121	BAURA63_03170	2	BAURA63	47106	CDS	FXYZ01000017	47106	47663	3	+	558	Hypothetical protein	- none -
Hypothetical	fig|273384.16.peg.3123	BAURA63_03172	2	BAURA63	50205	CDS	FXYZ01000017	50205	50441	3	+	237	Hypothetical protein	- none -
Hypothetical	fig|273384.16.peg.3124	BAURA63_03173	2	BAURA63	50444	CDS	FXYZ01000017	50444	50746	2	+	303	Hypothetical protein	- none -
Hypothetical	fig|273384.16.peg.3126	BAURA63_03175	2	BAURA63	51749	CDS	FXYZ01000017	52126	51749	-1	-	378	Hypothetical protein	- none -
Hypothetical	fig|273384.16.peg.3127	BAURA63_03176	2	BAURA63	52362	CDS	FXYZ01000017	52622	52362	-2	-	261	Hypothetical protein	- none -
Hypothetical	fig|273384.16.peg.3128	BAURA63_03177	2	BAURA63	52640	CDS	FXYZ01000017	53839	52640	-1	-	1200	Hypothetical protein	- none -
Hypothetical	fig|273384.16.peg.3129	BAURA63_03178	2	BAURA63	53856	CDS	FXYZ01000017	54239	53856	-2	-	384	Hypothetical protein	- none -
Hypothetical	fig|273384.16.peg.3131	BAURA63_03180	2	BAURA63	55325	CDS	FXYZ01000017	55501	55325	-1	-	177	Hypothetical protein	- none -
Hypothetical	fig|273384.16.peg.3132	BAURA63_03181	2	BAURA63	55498	CDS	FXYZ01000017	56034	55498	-3	-	537	Hypothetical protein	- none -
Hypothetical	fig|273384.16.peg.2609	BAURA63_02647	2	BAURA63	90406	CDS	FXYZ01000011	90406	90954	1	+	549	Hypothetical protein	- none -
Hypothetical	fig|273384.16.peg.2193	BAURA63_02224	2	BAURA63	94524	CDS	FXYZ01000008	94524	94787	3	+	264	Hypothetical protein	- none -
Hypothetical	fig|273384.16.peg.2840	BAURA63_02882	2	BAURA63	108823	CDS	FXYZ01000013	108823	109392	1	+	570	Hypothetical protein	- none -
Hypothetical	fig|273384.16.peg.1504	BAURA63_01529	2	BAURA63	113420	CDS	FXYZ01000005	113701	113420	-1	-	282	Hypothetical protein	- none -
Hypothetical	fig|273384.16.peg.2384	BAURA63_02418	2	BAURA63	129331	CDS	FXYZ01000009	130119	129331	-3	-	789	Hypothetical protein	- none -
Hypothetical	fig|273384.16.peg.2385	BAURA63_02419	2	BAURA63	130116	CDS	FXYZ01000009	130835	130116	-2	-	720	Hypothetical protein	- none -
Hypothetical	fig|273384.16.peg.1547	BAURA63_01572	2	BAURA63	155550	CDS	FXYZ01000005	155550	155846	3	+	297	Hypothetical protein	- none -
Hypothetical	fig|273384.16.peg.1277	BAURA63_01296	2	BAURA63	193019	CDS	FXYZ01000004	193019	193177	2	+	159	Hypothetical protein	- none -
Hypothetical	fig|273384.16.peg.1278	BAURA63_01297	2	BAURA63	193190	CDS	FXYZ01000004	193190	193642	2	+	453	Hypothetical protein	- none -
Hypothetical	fig|273384.16.peg.1279	BAURA63_01298	2	BAURA63	193632	CDS	FXYZ01000004	193632	193961	3	+	330	Hypothetical protein	- none -
Hypothetical	fig|273384.16.peg.1282	BAURA63_01301	2	BAURA63	196734	CDS	FXYZ01000004	196734	196874	3	+	141	Hypothetical protein	- none -
Hypothetical	fig|273384.16.peg.1283	BAURA63_01302	2	BAURA63	196895	CDS	FXYZ01000004	196895	197125	2	+	231	Hypothetical protein	- none -
Hypothetical	fig|273384.16.peg.1284	BAURA63_01303	2	BAURA63	197742	CDS	FXYZ01000004	198248	197742	-2	-	507	Hypothetical protein	- none -
Hypothetical	fig|273384.16.peg.987	BAURA63_01000	2	BAURA63	207928	CDS	FXYZ01000003	207928	208290	1	+	363	Hypothetical protein	- none -
Hypothetical	fig|273384.16.peg.991	BAURA63_01004	2	BAURA63	209923	CDS	FXYZ01000003	209923	210972	1	+	1050	Hypothetical protein	- none -
Hypothetical	fig|273384.16.peg.736	BAURA63_00747	2	BAURA63	257939	CDS	FXYZ01000002	257939	258973	2	+	1035	Hypothetical protein	- none -
Hypothetical	fig|273384.15.peg.4057	BAURA86_04114	6	BAURA86	1	CDS	FXZI01000079	228	1	-3	-	228	Hypothetical protein	- none -
Hypothetical	fig|273384.15.peg.4089	BAURA86_04146	6	BAURA86	1	CDS	FXZI01000096	135	1	-3	-	135	Hypothetical protein	- none -
Hypothetical	fig|273384.15.peg.4042	BAURA86_04099	6	BAURA86	1	CDS	FXZI01000072	453	1	-3	-	453	Hypothetical protein	- none -
Hypothetical	fig|273384.15.peg.4072	BAURA86_04129	6	BAURA86	1	CDS	FXZI01000086	228	1	-3	-	228	Hypothetical protein	- none -
Hypothetical	fig|273384.15.peg.4084	BAURA86_04141	6	BAURA86	1	CDS	FXZI01000093	1	630	1	+	630	Hypothetical protein	- none -
Hypothetical	fig|273384.15.peg.1840	BAURA86_01871	6	BAURA86	3	CDS	FXZI01000006	3	458	3	+	456	Hypothetical protein	- none -
Hypothetical	fig|273384.15.peg.4031	BAURA86_04088	6	BAURA86	3	CDS	FXZI01000067	152	3	-2	-	150	Hypothetical protein	- none -
Hypothetical	fig|273384.15.peg.4053	BAURA86_04110	6	BAURA86	3	CDS	FXZI01000077	3	599	3	+	597	Hypothetical protein	- none -
Hypothetical	fig|273384.15.peg.4070	BAURA86_04127	6	BAURA86	3	CDS	FXZI01000085	179	3	-2	-	177	Hypothetical protein	- none -
Hypothetical	fig|273384.15.peg.2441	BAURA86_02480	6	BAURA86	21	CDS	FXZI01000009	21	392	3	+	372	Hypothetical protein	- none -
Hypothetical	fig|273384.15.peg.4045	BAURA86_04102	6	BAURA86	171	CDS	FXZI01000073	308	171	-2	-	138	Hypothetical protein	- none -
Hypothetical	fig|273384.15.peg.2935	BAURA86_02979	6	BAURA86	208	CDS	FXZI01000012	345	208	-3	-	138	Hypothetical protein	- none -
Hypothetical	fig|273384.15.peg.4041	BAURA86_04098	6	BAURA86	265	CDS	FXZI01000071	265	1191	1	+	927	Hypothetical protein	- none -
Hypothetical	fig|273384.15.peg.4007	BAURA86_04064	6	BAURA86	355	CDS	FXZI01000055	945	355	-3	-	591	Hypothetical protein	- none -
Hypothetical	fig|273384.15.peg.2936	BAURA86_02980	6	BAURA86	365	CDS	FXZI01000012	514	365	-1	-	150	Hypothetical protein	- none -
Hypothetical	fig|273384.15.peg.1377	BAURA86_01398	6	BAURA86	457	CDS	FXZI01000004	666	457	-3	-	210	Hypothetical protein	- none -
Hypothetical	fig|273384.15.peg.4080	BAURA86_04137	6	BAURA86	539	CDS	FXZI01000090	1030	539	-1	-	492	Hypothetical protein	- none -
Hypothetical	fig|273384.15.peg.4043	BAURA86_04100	6	BAURA86	541	CDS	FXZI01000072	1173	541	-3	-	633	Hypothetical protein	- none -
Hypothetical	fig|273384.15.peg.3178	BAURA86_03222	6	BAURA86	634	CDS	FXZI01000014	634	963	1	+	330	Hypothetical protein	- none -
Hypothetical	fig|273384.15.peg.4085	BAURA86_04142	6	BAURA86	640	CDS	FXZI01000093	640	1020	1	+	381	Hypothetical protein	- none -
Hypothetical	fig|273384.15.peg.2613	BAURA86_02653	6	BAURA86	651	CDS	FXZI01000010	651	935	3	+	285	Hypothetical protein	- none -
Hypothetical	fig|273384.15.peg.4054	BAURA86_04111	6	BAURA86	678	CDS	FXZI01000077	1055	678	-2	-	378	Hypothetical protein	- none -
Hypothetical	fig|273384.15.peg.3973	BAURA86_04029	6	BAURA86	685	CDS	FXZI01000039	685	837	1	+	153	Hypothetical protein	- none -
Hypothetical	fig|273384.15.peg.3977	BAURA86_04034	6	BAURA86	708	CDS	FXZI01000040	1193	708	-2	-	486	Hypothetical protein	- none -
Hypothetical	fig|273384.15.peg.1378	BAURA86_01399	6	BAURA86	744	CDS	FXZI01000004	1520	744	-2	-	777	Hypothetical protein	- none -
Hypothetical	fig|273384.15.peg.4069	BAURA86_04126	6	BAURA86	822	CDS	FXZI01000084	1091	822	-2	-	270	Hypothetical protein	- none -
Hypothetical	fig|273384.15.peg.4088	BAURA86_04145	6	BAURA86	882	CDS	FXZI01000095	882	1010	3	+	129	Hypothetical protein	- none -
Hypothetical	fig|273384.15.peg.4060	BAURA86_04117	6	BAURA86	909	CDS	FXZI01000080	909	1097	3	+	189	Hypothetical protein	- none -
Hypothetical	fig|273384.15.peg.4063	BAURA86_04120	6	BAURA86	918	CDS	FXZI01000081	1097	918	-2	-	180	Hypothetical protein	- none -
Hypothetical	fig|273384.15.peg.3896	BAURA86_03949	6	BAURA86	1357	CDS	FXZI01000028	1815	1357	-3	-	459	Hypothetical protein	- none -
Hypothetical	fig|273384.15.peg.1379	BAURA86_01400	6	BAURA86	1675	CDS	FXZI01000004	2247	1675	-3	-	573	Hypothetical protein	- none -
Hypothetical	fig|273384.15.peg.3979	BAURA86_04036	6	BAURA86	2134	CDS	FXZI01000040	2559	2134	-3	-	426	Hypothetical protein	- none -
Hypothetical	fig|273384.15.peg.3914	BAURA86_03967	6	BAURA86	2508	CDS	FXZI01000029	2508	2732	3	+	225	Hypothetical protein	- none -
Hypothetical	fig|273384.15.peg.1381	BAURA86_01402	6	BAURA86	3185	CDS	FXZI01000004	3185	3436	2	+	252	Hypothetical protein	- none -
Hypothetical	fig|273384.15.peg.3863	BAURA86_03916	6	BAURA86	3517	CDS	FXZI01000026	3517	4767	1	+	1251	Hypothetical protein	- none -
Hypothetical	fig|273384.15.peg.1382	BAURA86_01403	6	BAURA86	3629	CDS	FXZI01000004	4156	3629	-1	-	528	Hypothetical protein	- none -
Hypothetical	fig|273384.15.peg.1844	BAURA86_01875	6	BAURA86	3767	CDS	FXZI01000006	4090	3767	-1	-	324	Hypothetical protein	- none -
Hypothetical	fig|273384.15.peg.3936	BAURA86_03989	6	BAURA86	3954	CDS	FXZI01000030	3954	4088	3	+	135	Hypothetical protein	- none -
Hypothetical	fig|273384.15.peg.3592	BAURA86_03641	6	BAURA86	4565	CDS	FXZI01000019	4729	4565	-1	-	165	Hypothetical protein	- none -
Hypothetical	fig|273384.15.peg.3394	BAURA86_03441	6	BAURA86	4795	CDS	FXZI01000016	4795	5349	1	+	555	Hypothetical protein	- none -
Hypothetical	fig|273384.15.peg.2780	BAURA86_02820	6	BAURA86	5504	CDS	FXZI01000011	5668	5504	-1	-	165	Hypothetical protein	- none -
Hypothetical	fig|273384.15.peg.2446	BAURA86_02485	6	BAURA86	5669	CDS	FXZI01000009	6862	5669	-1	-	1194	Hypothetical protein	- none -
Hypothetical	fig|273384.15.peg.2781	BAURA86_02821	6	BAURA86	5784	CDS	FXZI01000011	5784	6050	3	+	267	Hypothetical protein	- none -
Hypothetical	fig|273384.15.peg.570	BAURA86_00582	6	BAURA86	5787	CDS	FXZI01000002	6335	5787	-2	-	549	Hypothetical protein	- none -
Hypothetical	fig|273384.15.peg.1385	BAURA86_01406	6	BAURA86	5816	CDS	FXZI01000004	5816	7045	2	+	1230	Hypothetical protein	- none -
Hypothetical	fig|273384.15.peg.3950	BAURA86_04003	6	BAURA86	5873	CDS	FXZI01000032	6142	5873	-1	-	270	Hypothetical protein	- none -
Hypothetical	fig|273384.15.peg.3881	BAURA86_03934	6	BAURA86	6204	CDS	FXZI01000027	6455	6204	-2	-	252	Hypothetical protein	- none -
Hypothetical	fig|273384.15.peg.3797	BAURA86_03847	6	BAURA86	6687	CDS	FXZI01000024	6687	7673	3	+	987	Hypothetical protein	- none -
Hypothetical	fig|273384.15.peg.2447	BAURA86_02486	6	BAURA86	6895	CDS	FXZI01000009	8193	6895	-3	-	1299	Hypothetical protein	- none -
Hypothetical	fig|273384.15.peg.3883	BAURA86_03936	6	BAURA86	7088	CDS	FXZI01000027	7282	7088	-1	-	195	Hypothetical protein	- none -
Hypothetical	fig|273384.15.peg.3884	BAURA86_03937	6	BAURA86	7279	CDS	FXZI01000027	7614	7279	-3	-	336	Hypothetical protein	- none -
Hypothetical	fig|273384.15.peg.2783	BAURA86_02823	6	BAURA86	7567	CDS	FXZI01000011	7989	7567	-3	-	423	Hypothetical protein	- none -
Hypothetical	fig|273384.15.peg.2449	BAURA86_02488	6	BAURA86	9012	CDS	FXZI01000009	10298	9012	-2	-	1287	Hypothetical protein	- none -
Hypothetical	fig|273384.15.peg.2450	BAURA86_02489	6	BAURA86	10315	CDS	FXZI01000009	11220	10315	-3	-	906	Hypothetical protein	- none -
Hypothetical	fig|273384.15.peg.1390	BAURA86_01411	6	BAURA86	11153	CDS	FXZI01000004	11153	11701	2	+	549	Hypothetical protein	- none -
Hypothetical	fig|273384.15.peg.2451	BAURA86_02490	6	BAURA86	11220	CDS	FXZI01000009	11396	11220	-2	-	177	Hypothetical protein	- none -
Hypothetical	fig|273384.15.peg.1391	BAURA86_01412	6	BAURA86	11970	CDS	FXZI01000004	11970	12515	3	+	546	Hypothetical protein	- none -
Hypothetical	fig|273384.15.peg.1392	BAURA86_01413	6	BAURA86	12617	CDS	FXZI01000004	13891	12617	-1	-	1275	Hypothetical protein	- none -
Hypothetical	fig|273384.15.peg.1393	BAURA86_01414	6	BAURA86	13888	CDS	FXZI01000004	14136	13888	-3	-	249	Hypothetical protein	- none -
Hypothetical	fig|273384.15.peg.1394	BAURA86_01415	6	BAURA86	14174	CDS	FXZI01000004	14215	14174	-1	-	42	Hypothetical protein	- none -
Hypothetical	fig|273384.15.peg.579	BAURA86_00591	6	BAURA86	14882	CDS	FXZI01000002	14882	15274	2	+	393	Hypothetical protein	- none -
Hypothetical	fig|273384.15.peg.3909	BAURA86_03962	6	BAURA86	15439	CDS	FXZI01000028	15439	15642	1	+	204	Hypothetical protein	- none -
Hypothetical	fig|273384.15.peg.3893	BAURA86_03946	6	BAURA86	16184	CDS	FXZI01000027	16816	16184	-1	-	633	Hypothetical protein	- none -
Hypothetical	fig|273384.15.peg.3894	BAURA86_03947	6	BAURA86	16983	CDS	FXZI01000027	16983	17426	3	+	444	Hypothetical protein	- none -
Hypothetical	fig|273384.15.peg.583	BAURA86_00595	6	BAURA86	18150	CDS	FXZI01000002	18150	18803	3	+	654	Hypothetical protein	- none -
Hypothetical	fig|273384.15.peg.3846	BAURA86_03899	6	BAURA86	19255	CDS	FXZI01000025	19255	19497	1	+	243	Hypothetical protein	- none -
Hypothetical	fig|273384.15.peg.3848	BAURA86_03901	6	BAURA86	22761	CDS	FXZI01000025	22761	23132	3	+	372	Hypothetical protein	- none -
Hypothetical	fig|273384.15.peg.3849	BAURA86_03902	6	BAURA86	23158	CDS	FXZI01000025	23158	23502	1	+	345	Hypothetical protein	- none -
Hypothetical	fig|273384.15.peg.3850	BAURA86_03903	6	BAURA86	23789	CDS	FXZI01000025	23789	25231	2	+	1443	Hypothetical protein	- none -
Hypothetical	fig|273384.15.peg.2464	BAURA86_02503	6	BAURA86	24282	CDS	FXZI01000009	24497	24282	-2	-	216	Hypothetical protein	- none -
Hypothetical	fig|273384.15.peg.3852	BAURA86_03905	6	BAURA86	27114	CDS	FXZI01000025	27335	27114	-2	-	222	Hypothetical protein	- none -
Hypothetical	fig|273384.15.peg.3853	BAURA86_03906	6	BAURA86	27332	CDS	FXZI01000025	27679	27332	-1	-	348	Hypothetical protein	- none -
Hypothetical	fig|273384.15.peg.3855	BAURA86_03908	6	BAURA86	28516	CDS	FXZI01000025	28516	28824	1	+	309	Hypothetical protein	- none -
Hypothetical	fig|273384.15.peg.3857	BAURA86_03910	6	BAURA86	29557	CDS	FXZI01000025	29557	29718	1	+	162	Hypothetical protein	- none -
Hypothetical	fig|273384.15.peg.3611	BAURA86_03660	6	BAURA86	34134	CDS	FXZI01000019	34134	35357	3	+	1224	Hypothetical protein	- none -
Hypothetical	fig|273384.15.peg.3657	BAURA86_03706	6	BAURA86	46397	CDS	FXZI01000020	46837	46397	-1	-	441	Hypothetical protein	- none -
Hypothetical	fig|273384.15.peg.630	BAURA86_00642	6	BAURA86	68259	CDS	FXZI01000002	68606	68259	-2	-	348	Hypothetical protein	- none -
Hypothetical	fig|273384.15.peg.631	BAURA86_00643	6	BAURA86	68798	CDS	FXZI01000002	68798	69310	2	+	513	Hypothetical protein	- none -
Hypothetical	fig|273384.15.peg.658	BAURA86_00670	6	BAURA86	95135	CDS	FXZI01000002	95135	95299	2	+	165	Hypothetical protein	- none -
Hypothetical	fig|273384.15.peg.3389	BAURA86_03436	6	BAURA86	102404	CDS	FXZI01000015	102404	102607	2	+	204	Hypothetical protein	- none -
Hypothetical	fig|273384.15.peg.2344	BAURA86_02383	6	BAURA86	107748	CDS	FXZI01000008	108326	107748	-2	-	579	Hypothetical protein	- none -
Hypothetical	fig|273384.15.peg.2347	BAURA86_02386	6	BAURA86	111545	CDS	FXZI01000008	111545	111691	2	+	147	Hypothetical protein	- none -
Hypothetical	fig|273384.15.peg.1738	BAURA86_01766	6	BAURA86	129650	CDS	FXZI01000005	130042	129650	-1	-	393	Hypothetical protein	- none -
Hypothetical	fig|273384.15.peg.1741	BAURA86_01769	6	BAURA86	132083	CDS	FXZI01000005	132955	132083	-1	-	873	Hypothetical protein	- none -
Hypothetical	fig|273384.15.peg.1743	BAURA86_01771	6	BAURA86	134906	CDS	FXZI01000005	135289	134906	-1	-	384	Hypothetical protein	- none -
Hypothetical	fig|273384.15.peg.2910	BAURA86_02954	6	BAURA86	146374	CDS	FXZI01000011	146374	146661	1	+	288	Hypothetical protein	- none -
Hypothetical	fig|273384.15.peg.1754	BAURA86_01782	6	BAURA86	148696	CDS	FXZI01000005	149175	148696	-3	-	480	Hypothetical protein	- none -
Hypothetical	fig|273384.15.peg.1755	BAURA86_01783	6	BAURA86	149172	CDS	FXZI01000005	149828	149172	-2	-	657	Hypothetical protein	- none -
Hypothetical	fig|273384.15.peg.1757	BAURA86_01785	6	BAURA86	150666	CDS	FXZI01000005	151016	150666	-2	-	351	Hypothetical protein	- none -
Hypothetical	fig|273384.15.peg.1764	BAURA86_01792	6	BAURA86	156357	CDS	FXZI01000005	156357	156740	3	+	384	Hypothetical protein	- none -
Hypothetical	fig|273384.15.peg.1520	BAURA86_01547	6	BAURA86	156855	CDS	FXZI01000004	156855	157502	3	+	648	Hypothetical protein	- none -
Hypothetical	fig|273384.15.peg.1773	BAURA86_01801	6	BAURA86	164805	CDS	FXZI01000005	164805	165581	3	+	777	Hypothetical protein	- none -
Hypothetical	fig|273384.15.peg.1775	BAURA86_01803	6	BAURA86	167082	CDS	FXZI01000005	167082	167639	3	+	558	Hypothetical protein	- none -
Hypothetical	fig|273384.15.peg.1778	BAURA86_01806	6	BAURA86	170006	CDS	FXZI01000005	170006	170602	2	+	597	Hypothetical protein	- none -
Hypothetical	fig|273384.15.peg.1779	BAURA86_01807	6	BAURA86	170613	CDS	FXZI01000005	170613	170813	3	+	201	Hypothetical protein	- none -
Hypothetical	fig|273384.15.peg.2016	BAURA86_02050	6	BAURA86	187816	CDS	FXZI01000006	187816	188820	1	+	1005	Hypothetical protein	- none -
Hypothetical	fig|273384.15.peg.2020	BAURA86_02054	6	BAURA86	191346	CDS	FXZI01000006	191346	192860	3	+	1515	Hypothetical protein	- none -
Hypothetical	fig|273384.15.peg.1595	BAURA86_01622	6	BAURA86	222175	CDS	FXZI01000004	222175	222321	1	+	147	Hypothetical protein	- none -
Hypothetical	fig|273384.15.peg.1830	BAURA86_01861	6	BAURA86	232687	CDS	FXZI01000005	232687	233139	1	+	453	Hypothetical protein	- none -
Hypothetical	fig|273384.15.peg.2056	BAURA86_02090	6	BAURA86	232993	CDS	FXZI01000006	232993	233964	1	+	972	Hypothetical protein	- none -
Hypothetical	fig|273384.15.peg.1831	BAURA86_01862	6	BAURA86	233160	CDS	FXZI01000005	233160	233537	3	+	378	Hypothetical protein	- none -
Hypothetical	fig|273384.15.peg.1610	BAURA86_01637	6	BAURA86	234957	CDS	FXZI01000004	234957	235712	3	+	756	Hypothetical protein	- none -
Hypothetical	fig|273384.15.peg.1612	BAURA86_01639	6	BAURA86	237997	CDS	FXZI01000004	237997	238146	1	+	150	Hypothetical protein	- none -
Hypothetical	fig|273384.15.peg.1837	BAURA86_01868	6	BAURA86	238610	CDS	FXZI01000005	239707	238610	-1	-	1098	Hypothetical protein	- none -
Hypothetical	fig|273384.15.peg.1838	BAURA86_01869	6	BAURA86	240239	CDS	FXZI01000005	240239	241102	2	+	864	Hypothetical protein	- none -
Hypothetical	fig|273384.15.peg.1614	BAURA86_01641	6	BAURA86	241296	CDS	FXZI01000004	241296	241811	3	+	516	Hypothetical protein	- none -
Hypothetical	fig|273384.15.peg.1615	BAURA86_01642	6	BAURA86	241786	CDS	FXZI01000004	241786	242643	1	+	858	Hypothetical protein	- none -
Hypothetical	fig|273384.15.peg.1616	BAURA86_01643	6	BAURA86	242640	CDS	FXZI01000004	242640	243326	3	+	687	Hypothetical protein	- none -
Hypothetical	fig|273384.15.peg.1618	BAURA86_01645	6	BAURA86	245788	CDS	FXZI01000004	246483	245788	-3	-	696	Hypothetical protein	- none -
Hypothetical	fig|273384.15.peg.1620	BAURA86_01647	6	BAURA86	247950	CDS	FXZI01000004	247950	248519	3	+	570	Hypothetical protein	- none -
Hypothetical	fig|273384.15.peg.862	BAURA86_00877	6	BAURA86	312701	CDS	FXZI01000002	312904	312701	-1	-	204	Hypothetical protein	- none -
Hypothetical	fig|273384.15.peg.864	BAURA86_00879	6	BAURA86	313539	CDS	FXZI01000002	314000	313539	-2	-	462	Hypothetical protein	- none -
Hypothetical	fig|273384.15.peg.866	BAURA86_00881	6	BAURA86	315856	CDS	FXZI01000002	316389	315856	-3	-	534	Hypothetical protein	- none -
Hypothetical	fig|273384.15.peg.868	BAURA86_00883	6	BAURA86	317876	CDS	FXZI01000002	318700	317876	-1	-	825	Hypothetical protein	- none -
Hypothetical	fig|273384.15.peg.869	BAURA86_00884	6	BAURA86	318905	CDS	FXZI01000002	319843	318905	-1	-	939	Hypothetical protein	- none -
Hypothetical	fig|273384.15.peg.876	BAURA86_00891	6	BAURA86	325479	CDS	FXZI01000002	326168	325479	-2	-	690	Hypothetical protein	- none -
Hypothetical	fig|273384.15.peg.879	BAURA86_00894	6	BAURA86	328201	CDS	FXZI01000002	328605	328201	-3	-	405	Hypothetical protein	- none -
Hypothetical	fig|273384.15.peg.1367	BAURA86_01388	6	BAURA86	335701	CDS	FXZI01000003	335701	336633	1	+	933	Hypothetical protein	- none -
Hypothetical	fig|273384.15.peg.890	BAURA86_00905	6	BAURA86	338921	CDS	FXZI01000002	339457	338921	-1	-	537	Hypothetical protein	- none -
Hypothetical	fig|273384.15.peg.1370	BAURA86_01391	6	BAURA86	338978	CDS	FXZI01000003	339157	338978	-1	-	180	Hypothetical protein	- none -
Hypothetical	fig|273384.15.peg.1372	BAURA86_01393	6	BAURA86	340127	CDS	FXZI01000003	341107	340127	-1	-	981	Hypothetical protein	- none -
Hypothetical	fig|273384.15.peg.1373	BAURA86_01394	6	BAURA86	341168	CDS	FXZI01000003	341593	341168	-1	-	426	Hypothetical protein	- none -
Hypothetical	fig|273384.15.peg.1375	BAURA86_01396	6	BAURA86	342466	CDS	FXZI01000003	343050	342466	-3	-	585	Hypothetical protein	- none -
Hypothetical	fig|273384.15.peg.899	BAURA86_00914	6	BAURA86	349325	CDS	FXZI01000002	349325	350167	2	+	843	Hypothetical protein	- none -
Hypothetical	fig|273384.15.peg.902	BAURA86_00917	6	BAURA86	352247	CDS	FXZI01000002	352247	353704	2	+	1458	Hypothetical protein	- none -
Hypothetical	fig|273384.15.peg.903	BAURA86_00918	6	BAURA86	353783	CDS	FXZI01000002	354157	353783	-1	-	375	Hypothetical protein	- none -
Hypothetical	fig|273384.15.peg.904	BAURA86_00919	6	BAURA86	354289	CDS	FXZI01000002	354289	354672	1	+	384	Hypothetical protein	- none -
Hypothetical	fig|273384.15.peg.905	BAURA86_00920	6	BAURA86	354672	CDS	FXZI01000002	354672	355073	3	+	402	Hypothetical protein	- none -
Hypothetical	fig|273384.15.peg.907	BAURA86_00922	6	BAURA86	356173	CDS	FXZI01000002	356514	356173	-3	-	342	Hypothetical protein	- none -
Hypothetical	fig|273384.15.peg.404	BAURA86_00413	6	BAURA86	455795	CDS	FXZI01000001	455795	456007	2	+	213	Hypothetical protein	- none -
Hypothetical	fig|273384.15.peg.406	BAURA86_00415	6	BAURA86	456252	CDS	FXZI01000001	456252	458504	3	+	2253	Hypothetical protein	- none -
Hypothetical	fig|273384.15.peg.409	BAURA86_00418	6	BAURA86	460863	CDS	FXZI01000001	461204	460863	-2	-	342	Hypothetical protein	- none -
Hypothetical	fig|273384.15.peg.410	BAURA86_00419	6	BAURA86	461621	CDS	FXZI01000001	462235	461621	-1	-	615	Hypothetical protein	- none -
Hypothetical	fig|273384.15.peg.440	BAURA86_00451	6	BAURA86	490737	CDS	FXZI01000001	491945	490737	-2	-	1209	Hypothetical protein	- none -
Hypothetical	fig|273384.15.peg.458	BAURA86_00469	6	BAURA86	511898	CDS	FXZI01000001	511898	512197	2	+	300	Hypothetical protein	- none -
Hypothetical	fig|273384.15.peg.460	BAURA86_00471	6	BAURA86	513423	CDS	FXZI01000001	513423	513776	3	+	354	Hypothetical protein	- none -
Hypothetical	fig|273384.15.peg.461	BAURA86_00472	6	BAURA86	513878	CDS	FXZI01000001	514816	513878	-1	-	939	Hypothetical protein	- none -
Hypothetical	fig|273384.15.peg.462	BAURA86_00473	6	BAURA86	514803	CDS	FXZI01000001	515672	514803	-2	-	870	Hypothetical protein	- none -
Hypothetical	fig|273384.15.peg.465	BAURA86_00476	6	BAURA86	521246	CDS	FXZI01000001	521246	521785	2	+	540	Hypothetical protein	- none -
Hypothetical	fig|273384.15.peg.476	BAURA86_00487	6	BAURA86	533406	CDS	FXZI01000001	533406	533867	3	+	462	Hypothetical protein	- none -
Hypothetical	fig|273384.15.peg.479	BAURA86_00490	6	BAURA86	535822	CDS	FXZI01000001	535822	536547	1	+	726	Hypothetical protein	- none -
Hypothetical	fig|273384.15.peg.485	BAURA86_00496	6	BAURA86	541831	CDS	FXZI01000001	541831	542631	1	+	801	Hypothetical protein	- none -
Hypothetical	fig|273384.15.peg.487	BAURA86_00498	6	BAURA86	544127	CDS	FXZI01000001	544127	544579	2	+	453	Hypothetical protein	- none -
Hypothetical	fig|273384.15.peg.488	BAURA86_00499	6	BAURA86	544660	CDS	FXZI01000001	544660	545130	1	+	471	Hypothetical protein	- none -
Hypothetical	fig|273384.15.peg.1066	BAURA86_01084	6	BAURA86	546066	CDS	FXZI01000002	546066	546683	3	+	618	Hypothetical protein	- none -
Hypothetical	fig|273384.15.peg.490	BAURA86_00501	6	BAURA86	547139	CDS	FXZI01000001	547139	547687	2	+	549	Hypothetical protein	- none -
Hypothetical	fig|273384.15.peg.492	BAURA86_00503	6	BAURA86	552843	CDS	FXZI01000001	552843	553343	3	+	501	Hypothetical protein	- none -
Hypothetical	fig|273384.15.peg.495	BAURA86_00506	6	BAURA86	554914	CDS	FXZI01000001	554914	555330	1	+	417	Hypothetical protein	- none -
Hypothetical	fig|273384.15.peg.551	BAURA86_00563	6	BAURA86	616213	CDS	FXZI01000001	616213	616338	1	+	126	Hypothetical protein	- none -
Hypothetical	fig|273384.15.peg.564	BAURA86_00576	6	BAURA86	627293	CDS	FXZI01000001	627448	627293	-1	-	156	Hypothetical protein	- none -
Hypothetical	fig|1703.41.peg.270	BLSMQ_RS01415	0	BLSMQ	297410	CDS	NZ_CP017150	297410	302176	2	+	4767	Hypothetical protein	- none -
Hypothetical	fig|1703.41.peg.275	BLSMQ_RS01440	0	BLSMQ	307790	CDS	NZ_CP017150	307790	309640	2	+	1851	Hypothetical protein	- none -
Hypothetical	fig|1703.41.peg.282	BLSMQ_RS01465	0	BLSMQ	319529	CDS	NZ_CP017150	319529	321100	2	+	1572	Hypothetical protein	- none -
Hypothetical	fig|1703.41.peg.285	BLSMQ_RS01480	0	BLSMQ	325231	CDS	NZ_CP017150	325231	325974	1	+	744	Hypothetical protein	- none -
Hypothetical	fig|1703.41.peg.362	BLSMQ_RS01890	0	BLSMQ	424375	CDS	NZ_CP017150	424375	425031	1	+	657	Hypothetical protein	- none -
Hypothetical	fig|1703.41.peg.363	BLSMQ_RS01895	0	BLSMQ	425047	CDS	NZ_CP017150	425256	425047	-3	-	210	Hypothetical protein	- none -
Hypothetical	fig|1703.41.peg.364	BLSMQ_RS01900	0	BLSMQ	425321	CDS	NZ_CP017150	425758	425321	-1	-	438	Hypothetical protein	- none -
Hypothetical	fig|1703.41.peg.366	BLSMQ_RS19280	0	BLSMQ	427822	CDS	NZ_CP017150	428022	427822	-3	-	201	Hypothetical protein	- none -
Hypothetical	fig|1703.41.peg.462	BLSMQ_RS19305	0	BLSMQ	542463	CDS	NZ_CP017150	542463	543887	3	+	1425	Hypothetical protein	- none -
Hypothetical	fig|1703.41.peg.463	BLSMQ_RS02410	0	BLSMQ	545744	CDS	NZ_CP017150	546040	545744	-1	-	297	Hypothetical protein	- none -
Hypothetical	fig|1703.41.peg.468	BLSMQ_RS02435	0	BLSMQ	552452	CDS	NZ_CP017150	552661	552452	-1	-	210	Hypothetical protein	- none -
Hypothetical	fig|1703.41.peg.469	BLSMQ_RS19315	0	BLSMQ	553213	CDS	NZ_CP017150	553401	553213	-3	-	189	Hypothetical protein	- none -
Hypothetical	fig|1703.41.peg.472	BLSMQ_RS02455	0	BLSMQ	555555	CDS	NZ_CP017150	555555	556307	3	+	753	Hypothetical protein	- none -
Hypothetical	fig|1703.41.peg.473	BLSMQ_RS19320	0	BLSMQ	556304	CDS	NZ_CP017150	556304	558235	2	+	1932	Hypothetical protein	- none -
Hypothetical	fig|1703.41.peg.474	BLSMQ_RS02475	0	BLSMQ	559773	CDS	NZ_CP017150	559773	559982	3	+	210	Hypothetical protein	- none -
Hypothetical	fig|1703.41.peg.504	BLSMQ_RS02635	0	BLSMQ	589270	CDS	NZ_CP017150	590112	589270	-3	-	843	Hypothetical protein	- none -
Hypothetical	fig|1703.41.peg.808	BLSMQ_RS04215	0	BLSMQ	940879	CDS	NZ_CP017150	941247	940879	-3	-	369	Hypothetical protein	- none -
Hypothetical	fig|1703.41.peg.912	BLSMQ_RS04755	0	BLSMQ	1047887	CDS	NZ_CP017150	1048228	1047887	-1	-	342	Hypothetical protein	- none -
Hypothetical	fig|1703.41.peg.1350	BLSMQ_RS07005	0	BLSMQ	1520723	CDS	NZ_CP017150	1520723	1521322	2	+	600	Hypothetical protein	- none -
Hypothetical	fig|1703.41.peg.1364	BLSMQ_RS07075	0	BLSMQ	1536898	CDS	NZ_CP017150	1536898	1537632	1	+	735	Hypothetical protein	- none -
Hypothetical	fig|1703.41.peg.1371	BLSMQ_RS19470	0	BLSMQ	1543979	CDS	NZ_CP017150	1543979	1544371	2	+	393	Hypothetical protein	- none -
Hypothetical	fig|1703.41.peg.1376	BLSMQ_RS19475	0	BLSMQ	1548407	CDS	NZ_CP017150	1548796	1548407	-1	-	390	Hypothetical protein	- none -
Hypothetical	fig|1703.41.peg.1787	BLSMQ_RS09260	0	BLSMQ	2009924	CDS	NZ_CP017150	2010415	2009924	-1	-	492	Hypothetical protein	- none -
Hypothetical	fig|1703.41.peg.1890	BLSMQ_RS09815	0	BLSMQ	2123584	CDS	NZ_CP017150	2124750	2123584	-3	-	1167	Hypothetical protein	- none -
Hypothetical	fig|1703.41.peg.1892	BLSMQ_RS09825	0	BLSMQ	2125140	CDS	NZ_CP017150	2125478	2125140	-2	-	339	Hypothetical protein	- none -
Hypothetical	fig|1703.41.peg.1893	BLSMQ_RS09830	0	BLSMQ	2125480	CDS	NZ_CP017150	2125668	2125480	-3	-	189	Hypothetical protein	- none -
Hypothetical	fig|1703.41.peg.1894	BLSMQ_RS09835	0	BLSMQ	2125665	CDS	NZ_CP017150	2125862	2125665	-2	-	198	Hypothetical protein	- none -
Hypothetical	fig|1703.41.peg.1895	BLSMQ_RS09840	0	BLSMQ	2125965	CDS	NZ_CP017150	2125965	2126375	3	+	411	Hypothetical protein	- none -
Hypothetical	fig|1703.41.peg.1952	BLSMQ_RS10125	0	BLSMQ	2186054	CDS	NZ_CP017150	2186308	2186054	-1	-	255	Hypothetical protein	- none -
Hypothetical	fig|1703.41.peg.1956	BLSMQ_RS10165	0	BLSMQ	2190417	CDS	NZ_CP017150	2190417	2190977	3	+	561	Hypothetical protein	- none -
Hypothetical	fig|1703.41.peg.1959	BLSMQ_RS10185	0	BLSMQ	2193645	CDS	NZ_CP017150	2193645	2193857	3	+	213	Hypothetical protein	- none -
Hypothetical	fig|1703.41.peg.1960	BLSMQ_RS10190	0	BLSMQ	2193915	CDS	NZ_CP017150	2194289	2193915	-2	-	375	Hypothetical protein	- none -
Hypothetical	fig|1703.41.peg.1966	BLSMQ_RS10240	0	BLSMQ	2202922	CDS	NZ_CP017150	2202922	2203164	1	+	243	Hypothetical protein	- none -
Hypothetical	fig|1703.41.peg.1971	BLSMQ_RS10270	0	BLSMQ	2209000	CDS	NZ_CP017150	2209311	2209000	-3	-	312	Hypothetical protein	- none -
Hypothetical	fig|1703.41.peg.1975	BLSMQ_RS10290	0	BLSMQ	2212658	CDS	NZ_CP017150	2213476	2212658	-1	-	819	Hypothetical protein	- none -
Hypothetical	fig|1703.41.peg.2332	BLSMQ_RS12130	0	BLSMQ	2624554	CDS	NZ_CP017150	2624554	2625219	1	+	666	Hypothetical protein	- none -
Hypothetical	fig|1703.41.peg.2354	BLSMQ_RS12260	0	BLSMQ	2660087	CDS	NZ_CP017150	2660087	2660551	2	+	465	Hypothetical protein	- none -
Hypothetical	fig|1703.41.peg.2366	BLSMQ_RS12315	0	BLSMQ	2670594	CDS	NZ_CP017150	2670594	2671316	3	+	723	Hypothetical protein	- none -
Hypothetical	fig|1703.41.peg.2380	BLSMQ_RS12390	0	BLSMQ	2693351	CDS	NZ_CP017150	2693351	2694004	2	+	654	Hypothetical protein	- none -
Hypothetical	fig|1703.41.peg.2652	BLSMQ_RS13795	0	BLSMQ	3002784	CDS	NZ_CP017150	3003050	3002784	-2	-	267	Hypothetical protein	- none -
Hypothetical	fig|1703.41.peg.2659	BLSMQ_RS13830	0	BLSMQ	3011392	CDS	NZ_CP017150	3011392	3012774	1	+	1383	Hypothetical protein	- none -
Hypothetical	fig|1703.41.peg.2660	BLSMQ_RS13835	0	BLSMQ	3012983	CDS	NZ_CP017150	3013525	3012983	-1	-	543	Hypothetical protein	- none -
Hypothetical	fig|1703.41.peg.2663	BLSMQ_RS13855	0	BLSMQ	3021006	CDS	NZ_CP017150	3021398	3021006	-2	-	393	Hypothetical protein	- none -
Hypothetical	fig|1703.41.peg.2664	BLSMQ_RS13860	0	BLSMQ	3021395	CDS	NZ_CP017150	3022372	3021395	-1	-	978	Hypothetical protein	- none -
Hypothetical	fig|1703.41.peg.2666	BLSMQ_RS13870	0	BLSMQ	3025973	CDS	NZ_CP017150	3025973	3026590	2	+	618	Hypothetical protein	- none -
Hypothetical	fig|1703.41.peg.2668	BLSMQ_RS13880	0	BLSMQ	3028025	CDS	NZ_CP017150	3028025	3028216	2	+	192	Hypothetical protein	- none -
Hypothetical	fig|1703.41.peg.2671	BLSMQ_RS13895	0	BLSMQ	3030008	CDS	NZ_CP017150	3031489	3030008	-1	-	1482	Hypothetical protein	- none -
Hypothetical	fig|1703.41.peg.2673	BLSMQ_RS13905	0	BLSMQ	3033340	CDS	NZ_CP017150	3035091	3033340	-3	-	1752	Hypothetical protein	- none -
Hypothetical	fig|1703.41.peg.2674	BLSMQ_RS13910	0	BLSMQ	3035088	CDS	NZ_CP017150	3036053	3035088	-2	-	966	Hypothetical protein	- none -
Hypothetical	fig|1703.41.peg.2675	BLSMQ_RS13915	0	BLSMQ	3036065	CDS	NZ_CP017150	3036532	3036065	-1	-	468	Hypothetical protein	- none -
Hypothetical	fig|1703.41.peg.2676	BLSMQ_RS13920	0	BLSMQ	3036561	CDS	NZ_CP017150	3037139	3036561	-2	-	579	Hypothetical protein	- none -
Hypothetical	fig|1703.41.peg.2677	BLSMQ_RS13925	0	BLSMQ	3037340	CDS	NZ_CP017150	3037696	3037340	-1	-	357	Hypothetical protein	- none -
Hypothetical	fig|1703.41.peg.2679	BLSMQ_RS13935	0	BLSMQ	3043413	CDS	NZ_CP017150	3043413	3044045	3	+	633	Hypothetical protein	- none -
Hypothetical	fig|1703.41.peg.2683	BLSMQ_RS13955	0	BLSMQ	3047514	CDS	NZ_CP017150	3047514	3047714	3	+	201	Hypothetical protein	- none -
Hypothetical	fig|1703.41.peg.2684	BLSMQ_RS13960	0	BLSMQ	3047721	CDS	NZ_CP017150	3047721	3048056	3	+	336	Hypothetical protein	- none -
Hypothetical	fig|1703.41.peg.2686	BLSMQ_RS13970	0	BLSMQ	3049542	CDS	NZ_CP017150	3049542	3050489	3	+	948	Hypothetical protein	- none -
Hypothetical	fig|1703.41.peg.2687	BLSMQ_RS13975	0	BLSMQ	3050529	CDS	NZ_CP017150	3050529	3051620	3	+	1092	Hypothetical protein	- none -
Hypothetical	fig|1703.41.peg.2688	BLSMQ_RS13980	0	BLSMQ	3051665	CDS	NZ_CP017150	3051665	3052702	2	+	1038	Hypothetical protein	- none -
Hypothetical	fig|1703.41.peg.2689	BLSMQ_RS13985	0	BLSMQ	3052753	CDS	NZ_CP017150	3052753	3053718	1	+	966	Hypothetical protein	- none -
Hypothetical	fig|1703.41.peg.2690	BLSMQ_RS14000	0	BLSMQ	3055416	CDS	NZ_CP017150	3055416	3056333	3	+	918	Hypothetical protein	- none -
Hypothetical	fig|1703.41.peg.2691	BLSMQ_RS14005	0	BLSMQ	3056690	CDS	NZ_CP017150	3056690	3057205	2	+	516	Hypothetical protein	- none -
Hypothetical	fig|1703.41.peg.2758	BLSMQ_RS14355	0	BLSMQ	3124348	CDS	NZ_CP017150	3124348	3124656	1	+	309	Hypothetical protein	- none -
Hypothetical	fig|1703.41.peg.2762	BLSMQ_RS14380	0	BLSMQ	3128472	CDS	NZ_CP017150	3128472	3128684	3	+	213	Hypothetical protein	- none -
Hypothetical	fig|1703.41.peg.2801	BLSMQ_RS14585	0	BLSMQ	3169316	CDS	NZ_CP017150	3169513	3169316	-1	-	198	Hypothetical protein	- none -
Hypothetical	fig|1703.41.peg.2802	BLSMQ_RS14590	0	BLSMQ	3169539	CDS	NZ_CP017150	3169539	3169964	3	+	426	Hypothetical protein	- none -
Hypothetical	fig|1703.41.peg.2815	BLSMQ_RS14660	0	BLSMQ	3184804	CDS	NZ_CP017150	3184804	3185262	1	+	459	Hypothetical protein	- none -
Hypothetical	fig|1703.41.peg.2955	BLSMQ_RS15370	0	BLSMQ	3351215	CDS	NZ_CP017150	3351889	3351215	-1	-	675	Hypothetical protein	- none -
Hypothetical	fig|1703.41.peg.2961	BLSMQ_RS15395	0	BLSMQ	3354974	CDS	NZ_CP017150	3354974	3355987	2	+	1014	Hypothetical protein	- none -
Hypothetical	fig|1703.41.peg.2967	BLSMQ_RS15425	0	BLSMQ	3361149	CDS	NZ_CP017150	3361580	3361149	-2	-	432	Hypothetical protein	- none -
Hypothetical	fig|1703.41.peg.3230	BLSMQ_RS16770	0	BLSMQ	3642514	CDS	NZ_CP017150	3642867	3642514	-3	-	354	Hypothetical protein	- none -
Hypothetical	fig|1703.46.peg.1548	CIK79_RS08090	9	CIK79	65101	CDS	NZ_NRGX01000001	1824316	1824546	1	+	231	Hypothetical protein	- none -
Hypothetical	fig|1703.46.peg.1552	CIK79_RS08115	9	CIK79	69748	CDS	NZ_NRGX01000001	1829343	1828963	-3	-	381	Hypothetical protein	- none -
Hypothetical	fig|1703.46.peg.1553	CIK79_RS08120	9	CIK79	70612	CDS	NZ_NRGX01000001	1829827	1830450	1	+	624	Hypothetical protein	- none -
Hypothetical	fig|1703.46.peg.1554	CIK79_RS08125	9	CIK79	71269	CDS	NZ_NRGX01000001	1830484	1830873	1	+	390	Hypothetical protein	- none -
Hypothetical	fig|1703.46.peg.1555	CIK79_RS08130	9	CIK79	71651	CDS	NZ_NRGX01000001	1830866	1831330	2	+	465	Hypothetical protein	- none -
Hypothetical	fig|1703.46.peg.1556	CIK79_RS08135	9	CIK79	72138	CDS	NZ_NRGX01000001	1831353	1831772	3	+	420	Hypothetical protein	- none -
Hypothetical	fig|1703.46.peg.1628	CIK79_RS08510	9	CIK79	152445	CDS	NZ_NRGX01000001	1911902	1911660	-2	-	243	Hypothetical protein	- none -
Hypothetical	fig|1703.46.peg.1629	CIK79_RS08515	9	CIK79	152677	CDS	NZ_NRGX01000001	1912551	1911892	-3	-	660	Hypothetical protein	- none -
Hypothetical	fig|1703.46.peg.1630	CIK79_RS08520	9	CIK79	153448	CDS	NZ_NRGX01000001	1913154	1912663	-3	-	492	Hypothetical protein	- none -
Hypothetical	fig|1703.46.peg.1632	CIK79_RS08530	9	CIK79	155848	CDS	NZ_NRGX01000001	1915599	1915063	-3	-	537	Hypothetical protein	- none -
Hypothetical	fig|1703.46.peg.1633	CIK79_RS08535	9	CIK79	156449	CDS	NZ_NRGX01000001	1916128	1915664	-1	-	465	Hypothetical protein	- none -
Hypothetical	fig|1703.46.peg.1640	CIK79_RS08570	9	CIK79	163756	CDS	NZ_NRGX01000001	1922971	1923303	1	+	333	Hypothetical protein	- none -
Hypothetical	fig|1703.46.peg.1641	CIK79_RS08575	9	CIK79	164152	CDS	NZ_NRGX01000001	1923663	1923367	-3	-	297	Hypothetical protein	- none -
Hypothetical	fig|1703.46.peg.1643	CIK79_RS08585	9	CIK79	165711	CDS	NZ_NRGX01000001	1925606	1924926	-2	-	681	Hypothetical protein	- none -
Hypothetical	fig|1703.46.peg.1644	CIK79_RS08590	9	CIK79	166501	CDS	NZ_NRGX01000001	1926195	1925716	-3	-	480	Hypothetical protein	- none -
Hypothetical	fig|1703.46.peg.1646	CIK79_RS08600	9	CIK79	168052	CDS	NZ_NRGX01000001	1928109	1927267	-3	-	843	Hypothetical protein	- none -
Hypothetical	fig|1703.46.peg.1647	CIK79_RS08605	9	CIK79	169177	CDS	NZ_NRGX01000001	1928811	1928392	-3	-	420	Hypothetical protein	- none -
Hypothetical	fig|1703.46.peg.1648	CIK79_RS08610	9	CIK79	169589	CDS	NZ_NRGX01000001	1929049	1928804	-1	-	246	Hypothetical protein	- none -
Hypothetical	fig|1703.46.peg.1651	CIK79_RS08625	9	CIK79	171306	CDS	NZ_NRGX01000001	1930700	1930521	-2	-	180	Hypothetical protein	- none -
Hypothetical	fig|1703.46.peg.1686	CIK79_RS08805	9	CIK79	206890	CDS	NZ_NRGX01000001	1967376	1966105	-3	-	1272	Hypothetical protein	- none -
Hypothetical	fig|1703.46.peg.1687	CIK79_RS08825	9	CIK79	209739	CDS	NZ_NRGX01000001	1969448	1968954	-2	-	495	Hypothetical protein	- none -
Hypothetical	fig|1703.46.peg.1695	CIK79_RS08865	9	CIK79	218335	CDS	NZ_NRGX01000001	1978233	1977550	-3	-	684	Hypothetical protein	- none -
Hypothetical	fig|1703.46.peg.1697	CIK79_RS08875	9	CIK79	220134	CDS	NZ_NRGX01000001	1979645	1979349	-2	-	297	Hypothetical protein	- none -
Hypothetical	fig|1703.46.peg.1753	CIK79_RS09155	9	CIK79	277677	CDS	NZ_NRGX01000001	2036892	2037254	3	+	363	Hypothetical protein	- none -
Hypothetical	fig|1703.46.peg.1900	CIK79_RS09910	9	CIK79	451877	CDS	NZ_NRGX01000001	2211514	2211092	-1	-	423	Hypothetical protein	- none -
Hypothetical	fig|1703.46.peg.1950	CIK79_RS10160	9	CIK79	507465	CDS	NZ_NRGX01000001	2267423	2266680	-2	-	744	Hypothetical protein	- none -
Hypothetical	fig|1703.46.peg.2243	CIK79_RS11705	9	CIK79	855716	CDS	NZ_NRGX01000001	2614931	2615263	2	+	333	Hypothetical protein	- none -
Hypothetical	fig|1703.46.peg.2890	CIK79_RS15100	9	CIK79	1573574	CDS	NZ_NRGX01000001	3333019	3332789	-1	-	231	Hypothetical protein	- none -
Hypothetical	fig|1703.46.peg.2892	CIK79_RS15110	9	CIK79	1575501	CDS	NZ_NRGX01000001	3335399	3334716	-2	-	684	Hypothetical protein	- none -
Hypothetical	fig|1703.46.peg.3102	CIK79_RS16180	9	CIK79	1799278	CDS	NZ_NRGX01000001	3558493	3558867	1	+	375	Hypothetical protein	- none -
Hypothetical	fig|1703.46.peg.3119	CIK79_RS16270	9	CIK79	1816789	CDS	NZ_NRGX01000001	3576387	3576004	-3	-	384	Hypothetical protein	- none -
Hypothetical	fig|1703.46.peg.3311	CIK79_RS17270	9	CIK79	2039413	CDS	NZ_NRGX01000001	3798628	3798879	1	+	252	Hypothetical protein	- none -
Hypothetical	fig|1703.46.peg.19	CIK79_RS00095	9	CIK79	2585522	CDS	NZ_NRGX01000001	34123	34218	1	+	96	Hypothetical protein	- none -
Hypothetical	fig|1703.46.peg.22	CIK79_RS00110	9	CIK79	2588223	CDS	NZ_NRGX01000001	37222	36824	-1	-	399	Hypothetical protein	- none -
Hypothetical	fig|1703.46.peg.24	CIK79_RS00120	9	CIK79	2589226	CDS	NZ_NRGX01000001	38399	37827	-2	-	573	Hypothetical protein	- none -
Hypothetical	fig|1703.46.peg.26	CIK79_RS00130	9	CIK79	2590629	CDS	NZ_NRGX01000001	39230	39592	2	+	363	Hypothetical protein	- none -
Hypothetical	fig|1703.46.peg.27	CIK79_RS00135	9	CIK79	2591150	CDS	NZ_NRGX01000001	39751	40539	1	+	789	Hypothetical protein	- none -
Hypothetical	fig|1703.46.peg.29	CIK79_RS00145	9	CIK79	2593156	CDS	NZ_NRGX01000001	41757	42125	3	+	369	Hypothetical protein	- none -
Hypothetical	fig|1703.46.peg.34	CIK79_RS00170	9	CIK79	2598934	CDS	NZ_NRGX01000001	48077	47535	-2	-	543	Hypothetical protein	- none -
Hypothetical	fig|1703.46.peg.35	CIK79_RS00175	9	CIK79	2599800	CDS	NZ_NRGX01000001	48401	48898	2	+	498	Hypothetical protein	- none -
Hypothetical	fig|1703.46.peg.36	CIK79_RS00180	9	CIK79	2600334	CDS	NZ_NRGX01000001	49216	48935	-1	-	282	Hypothetical protein	- none -
Hypothetical	fig|1703.46.peg.38	CIK79_RS00190	9	CIK79	2601866	CDS	NZ_NRGX01000001	51156	50467	-3	-	690	Hypothetical protein	- none -
Hypothetical	fig|1703.46.peg.39	CIK79_RS00195	9	CIK79	2602641	CDS	NZ_NRGX01000001	51985	51242	-1	-	744	Hypothetical protein	- none -
Hypothetical	fig|1703.46.peg.40	CIK79_RS00200	9	CIK79	2603514	CDS	NZ_NRGX01000001	52534	52115	-1	-	420	Hypothetical protein	- none -
Hypothetical	fig|1703.46.peg.42	CIK79_RS00210	9	CIK79	2605170	CDS	NZ_NRGX01000001	54601	53771	-1	-	831	Hypothetical protein	- none -
Hypothetical	fig|1703.46.peg.43	CIK79_RS00215	9	CIK79	2606193	CDS	NZ_NRGX01000001	55207	54794	-1	-	414	Hypothetical protein	- none -
Hypothetical	fig|1703.46.peg.47	CIK79_RS00235	9	CIK79	2611093	CDS	NZ_NRGX01000001	59694	59951	3	+	258	Hypothetical protein	- none -
Hypothetical	fig|1703.46.peg.48	CIK79_RS00240	9	CIK79	2611365	CDS	NZ_NRGX01000001	59966	60388	2	+	423	Hypothetical protein	- none -
Hypothetical	fig|1703.46.peg.52	CIK79_RS00260	9	CIK79	2615944	CDS	NZ_NRGX01000001	65558	64545	-2	-	1014	Hypothetical protein	- none -
Hypothetical	fig|1703.46.peg.53	CIK79_RS00265	9	CIK79	2617111	CDS	NZ_NRGX01000001	67145	65712	-2	-	1434	Hypothetical protein	- none -
Hypothetical	fig|1703.46.peg.54	CIK79_RS00270	9	CIK79	2618634	CDS	NZ_NRGX01000001	67678	67235	-1	-	444	Hypothetical protein	- none -
Hypothetical	fig|1703.46.peg.56	CIK79_RS00280	9	CIK79	2621008	CDS	NZ_NRGX01000001	69609	70109	3	+	501	Hypothetical protein	- none -
Hypothetical	fig|1703.46.peg.59	CIK79_RS00295	9	CIK79	2624757	CDS	NZ_NRGX01000001	73933	73358	-1	-	576	Hypothetical protein	- none -
Hypothetical	fig|1703.46.peg.62	CIK79_RS00310	9	CIK79	2627195	CDS	NZ_NRGX01000001	75796	76284	1	+	489	Hypothetical protein	- none -
Hypothetical	fig|1703.46.peg.64	CIK79_RS00320	9	CIK79	2631833	CDS	NZ_NRGX01000001	80434	80754	1	+	321	Hypothetical protein	- none -
Hypothetical	fig|1703.46.peg.65	CIK79_RS00330	9	CIK79	2633206	CDS	NZ_NRGX01000001	82580	81807	-2	-	774	Hypothetical protein	- none -
Hypothetical	fig|1703.46.peg.67	CIK79_RS00340	9	CIK79	2634998	CDS	NZ_NRGX01000001	83994	83599	-3	-	396	Hypothetical protein	- none -
Hypothetical	fig|1703.46.peg.152	CIK79_RS00810	9	CIK79	2750035	CDS	NZ_NRGX01000001	198827	198636	-2	-	192	Hypothetical protein	- none -
Hypothetical	fig|1703.46.peg.153	CIK79_RS00815	9	CIK79	2750661	CDS	NZ_NRGX01000001	199510	199262	-1	-	249	Hypothetical protein	- none -
Hypothetical	fig|1703.46.peg.157	CIK79_RS00835	9	CIK79	2754005	CDS	NZ_NRGX01000001	202606	202848	1	+	243	Hypothetical protein	- none -
Hypothetical	fig|1703.46.peg.160	CIK79_RS00850	9	CIK79	2756986	CDS	NZ_NRGX01000001	207920	205587	-2	-	2334	Hypothetical protein	- none -
Hypothetical	fig|1703.46.peg.163	CIK79_RS00865	9	CIK79	2765983	CDS	NZ_NRGX01000001	215141	214584	-2	-	558	Hypothetical protein	- none -
Hypothetical	fig|1703.46.peg.164	CIK79_RS00870	9	CIK79	2766537	CDS	NZ_NRGX01000001	215863	215138	-1	-	726	Hypothetical protein	- none -
Hypothetical	fig|1703.46.peg.381	CIK79_RS02010	9	CIK79	3011280	CDS	NZ_NRGX01000001	459881	460069	2	+	189	Hypothetical protein	- none -
Hypothetical	fig|1703.46.peg.385	CIK79_RS02040	9	CIK79	3015279	CDS	NZ_NRGX01000001	463880	464068	2	+	189	Hypothetical protein	- none -
Hypothetical	fig|1703.46.peg.389	CIK79_RS02060	9	CIK79	3019215	CDS	NZ_NRGX01000001	467816	468046	2	+	231	Hypothetical protein	- none -
Hypothetical	fig|1703.46.peg.671	CIK79_RS03510	9	CIK79	3349404	CDS	NZ_NRGX01000001	798005	798967	2	+	963	Hypothetical protein	- none -
Hypothetical	fig|1703.46.peg.676	CIK79_RS03535	9	CIK79	3353915	CDS	NZ_NRGX01000001	802516	802809	1	+	294	Hypothetical protein	- none -
Hypothetical	fig|1703.46.peg.960	CIK79_RS05015	9	CIK79	3673327	CDS	NZ_NRGX01000001	1121928	1122137	3	+	210	Hypothetical protein	- none -
Hypothetical	fig|1703.46.peg.1100	CIK79_RS05745	9	CIK79	3838280	CDS	NZ_NRGX01000001	1287369	1286881	-3	-	489	Hypothetical protein	- none -
Hypothetical	fig|1703.46.peg.1101	CIK79_RS05750	9	CIK79	3838772	CDS	NZ_NRGX01000001	1287660	1287373	-3	-	288	Hypothetical protein	- none -
Hypothetical	fig|1703.46.peg.1197	CIK79_RS06255	9	CIK79	3957027	CDS	NZ_NRGX01000001	1405628	1405867	2	+	240	Hypothetical protein	- none -
Hypothetical	fig|1703.46.peg.1213	CIK79_RS06340	9	CIK79	3979582	CDS	NZ_NRGX01000001	1429634	1428183	-2	-	1452	Hypothetical protein	- none -
Hypothetical	fig|1703.46.peg.1216	CIK79_RS06355	9	CIK79	3983894	CDS	NZ_NRGX01000001	1433856	1432495	-3	-	1362	Hypothetical protein	- none -
Hypothetical	fig|273384.26.peg.218	CXR23_01170	10	CXR23	246429	CDS	CP025330	246429	246677	3	+	249	Hypothetical protein	- none -
Hypothetical	fig|273384.26.peg.282	CXR23_01495	10	CXR23	313662	CDS	CP025330	313662	315152	3	+	1491	Hypothetical protein	- none -
Hypothetical	fig|273384.26.peg.283	CXR23_01500	10	CXR23	315409	CDS	CP025330	315409	315597	1	+	189	Hypothetical protein	- none -
Hypothetical	fig|273384.26.peg.285	CXR23_01510	10	CXR23	317306	CDS	CP025330	317306	317584	2	+	279	Hypothetical protein	- none -
Hypothetical	fig|273384.26.peg.292	CXR23_01565	10	CXR23	325913	CDS	CP025330	325913	327022	2	+	1110	Hypothetical protein	- none -
Hypothetical	fig|273384.26.peg.386	CXR23_02050	10	CXR23	442492	CDS	CP025330	443727	442492	-3	-	1236	Hypothetical protein	- none -
Hypothetical	fig|273384.26.peg.390	CXR23_02070	10	CXR23	447116	CDS	CP025330	447116	447508	2	+	393	Hypothetical protein	- none -
Hypothetical	fig|273384.26.peg.391	CXR23_02075	10	CXR23	447505	CDS	CP025330	447505	448350	1	+	846	Hypothetical protein	- none -
Hypothetical	fig|273384.26.peg.424	CXR23_02255	10	CXR23	487954	CDS	CP025330	488286	487954	-3	-	333	Hypothetical protein	- none -
Hypothetical	fig|273384.26.peg.480	CXR23_02540	10	CXR23	559558	CDS	CP025330	560121	559558	-3	-	564	Hypothetical protein	- none -
Hypothetical	fig|273384.26.peg.535	CXR23_02830	10	CXR23	630411	CDS	CP025330	631694	630411	-2	-	1284	Hypothetical protein	- none -
Hypothetical	fig|273384.26.peg.536	CXR23_02835	10	CXR23	631760	CDS	CP025330	632494	631760	-1	-	735	Hypothetical protein	- none -
Hypothetical	fig|273384.26.peg.545	CXR23_02880	10	CXR23	643049	CDS	CP025330	644944	643049	-1	-	1896	Hypothetical protein	- none -
Hypothetical	fig|273384.26.peg.903	CXR23_04805	10	CXR23	1055306	CDS	CP025330	1055770	1055306	-1	-	465	Hypothetical protein	- none -
Hypothetical	fig|273384.26.peg.925	CXR23_04920	10	CXR23	1080475	CDS	CP025330	1081029	1080475	-3	-	555	Hypothetical protein	- none -
Hypothetical	fig|273384.26.peg.954	CXR23_05065	10	CXR23	1116665	CDS	CP025330	1117435	1116665	-1	-	771	Hypothetical protein	- none -
Hypothetical	fig|273384.26.peg.980	CXR23_05200	10	CXR23	1145296	CDS	CP025330	1145296	1145520	1	+	225	Hypothetical protein	- none -
Hypothetical	fig|273384.26.peg.1126	CXR23_06005	10	CXR23	1291397	CDS	CP025330	1291921	1291397	-1	-	525	Hypothetical protein	- none -
Hypothetical	fig|273384.26.peg.1135	CXR23_06060	10	CXR23	1300960	CDS	CP025330	1300960	1301199	1	+	240	Hypothetical protein	- none -
Hypothetical	fig|273384.26.peg.1318	CXR23_07035	10	CXR23	1496650	CDS	CP025330	1497075	1496650	-3	-	426	Hypothetical protein	- none -
Hypothetical	fig|273384.26.peg.1319	CXR23_07040	10	CXR23	1497644	CDS	CP025330	1497644	1498144	2	+	501	Hypothetical protein	- none -
Hypothetical	fig|273384.26.peg.1320	CXR23_07045	10	CXR23	1498163	CDS	CP025330	1498393	1498163	-1	-	231	Hypothetical protein	- none -
Hypothetical	fig|273384.26.peg.1321	CXR23_07050	10	CXR23	1498606	CDS	CP025330	1499376	1498606	-3	-	771	Hypothetical protein	- none -
Hypothetical	fig|273384.26.peg.1322	CXR23_07055	10	CXR23	1499632	CDS	CP025330	1499632	1500156	1	+	525	Hypothetical protein	- none -
Hypothetical	fig|273384.26.peg.1335	CXR23_07130	10	CXR23	1518076	CDS	CP025330	1518450	1518076	-3	-	375	Hypothetical protein	- none -
Hypothetical	fig|273384.26.peg.1336	CXR23_07135	10	CXR23	1518875	CDS	CP025330	1519414	1518875	-1	-	540	Hypothetical protein	- none -
Hypothetical	fig|273384.26.peg.1341	CXR23_07160	10	CXR23	1525152	CDS	CP025330	1525152	1526210	3	+	1059	Hypothetical protein	- none -
Hypothetical	fig|273384.26.peg.1344	CXR23_07175	10	CXR23	1528801	CDS	CP025330	1528801	1530042	1	+	1242	Hypothetical protein	- none -
Hypothetical	fig|273384.26.peg.1347	CXR23_07190	10	CXR23	1533400	CDS	CP025330	1533400	1534737	1	+	1338	Hypothetical protein	- none -
Hypothetical	fig|273384.26.peg.1348	CXR23_07200	10	CXR23	1535143	CDS	CP025330	1535337	1535143	-3	-	195	Hypothetical protein	- none -
Hypothetical	fig|273384.26.peg.1349	CXR23_07205	10	CXR23	1535511	CDS	CP025330	1535783	1535511	-2	-	273	Hypothetical protein	- none -
Hypothetical	fig|273384.26.peg.1415	CXR23_07540	10	CXR23	1613971	CDS	CP025330	1614732	1613971	-3	-	762	Hypothetical protein	- none -
Hypothetical	fig|273384.26.peg.1428	CXR23_07605	10	CXR23	1625388	CDS	CP025330	1625618	1625388	-2	-	231	Hypothetical protein	- none -
Hypothetical	fig|273384.26.peg.1466	CXR23_07815	10	CXR23	1669450	CDS	CP025330	1670181	1669450	-3	-	732	Hypothetical protein	- none -
Hypothetical	fig|273384.26.peg.1468	CXR23_07825	10	CXR23	1671223	CDS	CP025330	1671223	1672290	1	+	1068	Hypothetical protein	- none -
Hypothetical	fig|273384.26.peg.1472	CXR23_07845	10	CXR23	1675564	CDS	CP025330	1675785	1675564	-3	-	222	Hypothetical protein	- none -
Hypothetical	fig|273384.26.peg.1678	CXR23_08930	10	CXR23	1902942	CDS	CP025330	1903325	1902942	-2	-	384	Hypothetical protein	- none -
Hypothetical	fig|273384.26.peg.2417	CXR23_12860	10	CXR23	2762658	CDS	CP025330	2762658	2765744	3	+	3087	Hypothetical protein	- none -
Hypothetical	fig|273384.26.peg.2429	CXR23_12935	10	CXR23	2785738	CDS	CP025330	2785738	2787576	1	+	1839	Hypothetical protein	- none -
Hypothetical	fig|273384.26.peg.2644	CXR23_14060	10	CXR23	3029661	CDS	CP025330	3029661	3030329	3	+	669	Hypothetical protein	- none -
Hypothetical	fig|273384.26.peg.2647	CXR23_14075	10	CXR23	3032056	CDS	CP025330	3032056	3032571	1	+	516	Hypothetical protein	- none -
Hypothetical	fig|273384.26.peg.2649	CXR23_14085	10	CXR23	3033217	CDS	CP025330	3034188	3033217	-3	-	972	Hypothetical protein	- none -
Hypothetical	fig|273384.26.peg.2769	CXR23_14720	10	CXR23	3171888	CDS	CP025330	3174455	3171888	-2	-	2568	Hypothetical protein	- none -
Hypothetical	fig|273384.26.peg.2770	CXR23_14725	10	CXR23	3174452	CDS	CP025330	3176392	3174452	-1	-	1941	Hypothetical protein	- none -
Hypothetical	fig|273384.26.peg.2771	CXR23_14730	10	CXR23	3177418	CDS	CP025330	3178032	3177418	-3	-	615	Hypothetical protein	- none -
Hypothetical	fig|273384.26.peg.2772	CXR23_14735	10	CXR23	3178402	CDS	CP025330	3178402	3178707	1	+	306	Hypothetical protein	- none -
Hypothetical	fig|273384.26.peg.2780	CXR23_14775	10	CXR23	3189578	CDS	CP025330	3190492	3189578	-1	-	915	Hypothetical protein	- none -
Hypothetical	fig|273384.26.peg.2782	CXR23_14785	10	CXR23	3193265	CDS	CP025330	3193265	3193399	2	+	135	Hypothetical protein	- none -
Hypothetical	fig|273384.26.peg.2784	CXR23_14795	10	CXR23	3196993	CDS	CP025330	3197289	3196993	-3	-	297	Hypothetical protein	- none -
Hypothetical	fig|273384.26.peg.2786	CXR23_14805	10	CXR23	3201184	CDS	CP025330	3201819	3201184	-3	-	636	Hypothetical protein	- none -
Hypothetical	fig|273384.26.peg.2796	CXR23_14865	10	CXR23	3213123	CDS	CP025330	3213123	3213653	3	+	531	Hypothetical protein	- none -
Hypothetical	fig|273384.26.peg.2801	CXR23_14890	10	CXR23	3218642	CDS	CP025330	3219349	3218642	-1	-	708	Hypothetical protein	- none -
Hypothetical	fig|273384.26.peg.2810	CXR23_14935	10	CXR23	3229051	CDS	CP025330	3229051	3229557	1	+	507	Hypothetical protein	- none -
Hypothetical	fig|273384.26.peg.2813	CXR23_14950	10	CXR23	3231570	CDS	CP025330	3231570	3232304	3	+	735	Hypothetical protein	- none -
Hypothetical	fig|273384.26.peg.2818	CXR23_14980	10	CXR23	3237788	CDS	CP025330	3238246	3237788	-1	-	459	Hypothetical protein	- none -
Hypothetical	fig|273384.26.peg.2823	CXR23_15005	10	CXR23	3242251	CDS	CP025330	3242251	3243105	1	+	855	Hypothetical protein	- none -
Hypothetical	fig|273384.26.peg.2829	CXR23_15035	10	CXR23	3248658	CDS	CP025330	3248903	3248658	-2	-	246	Hypothetical protein	- none -
Hypothetical	fig|273384.26.peg.2832	CXR23_15050	10	CXR23	3250999	CDS	CP025330	3250999	3251532	1	+	534	Hypothetical protein	- none -
Hypothetical	fig|273384.26.peg.2840	CXR23_15090	10	CXR23	3261373	CDS	CP025330	3261585	3261373	-3	-	213	Hypothetical protein	- none -
Hypothetical	fig|273384.26.peg.2841	CXR23_15100	10	CXR23	3262420	CDS	CP025330	3262420	3262770	1	+	351	Hypothetical protein	- none -
Hypothetical	fig|273384.26.peg.2842	CXR23_15105	10	CXR23	3262827	CDS	CP025330	3263033	3262827	-2	-	207	Hypothetical protein	- none -
Hypothetical	fig|273384.26.peg.3052	CXR23_16200	10	CXR23	3517808	CDS	CP025330	3517808	3518770	2	+	963	Hypothetical protein	- none -
Hypothetical	fig|273384.26.peg.3316	CXR23_17565	10	CXR23	3811237	CDS	CP025330	3811488	3811237	-3	-	252	Hypothetical protein	- none -
Hypothetical	fig|273384.26.peg.3326	CXR23_17620	10	CXR23	3820930	CDS	CP025330	3821415	3820930	-3	-	486	Hypothetical protein	- none -
Hypothetical	fig|273384.26.peg.3327	CXR23_17625	10	CXR23	3821549	CDS	CP025330	3822517	3821549	-1	-	969	Hypothetical protein	- none -
Hypothetical	fig|273384.26.peg.3336	CXR23_17670	10	CXR23	3830716	CDS	CP025330	3831108	3830716	-3	-	393	Hypothetical protein	- none -
Hypothetical	fig|273384.26.peg.3343	CXR23_17705	10	CXR23	3838035	CDS	CP025330	3838304	3838035	-2	-	270	Hypothetical protein	- none -
Hypothetical	fig|273384.26.peg.3351	CXR23_17745	10	CXR23	3847057	CDS	CP025330	3847057	3847512	1	+	456	Hypothetical protein	- none -
Hypothetical	fig|273384.26.peg.3356	CXR23_17775	10	CXR23	3851960	CDS	CP025330	3852322	3851960	-1	-	363	Hypothetical protein	- none -
Hypothetical	fig|273384.26.peg.3364	CXR23_17815	10	CXR23	3858710	CDS	CP025330	3858710	3859231	2	+	522	Hypothetical protein	- none -
Hypothetical	fig|273384.26.peg.3368	CXR23_17835	10	CXR23	3862552	CDS	CP025330	3863172	3862552	-3	-	621	Hypothetical protein	- none -
Hypothetical	fig|273384.26.peg.3374	CXR23_17870	10	CXR23	3871235	CDS	CP025330	3871235	3871444	2	+	210	Hypothetical protein	- none -
Hypothetical	fig|273384.26.peg.3375	CXR23_17875	10	CXR23	3871574	CDS	CP025330	3871574	3871882	2	+	309	Hypothetical protein	- none -
Hypothetical	fig|273384.26.peg.3376	CXR23_17880	10	CXR23	3872030	CDS	CP025330	3872030	3872719	2	+	690	Hypothetical protein	- none -
Hypothetical	fig|273384.26.peg.3379	CXR23_17895	10	CXR23	3876905	CDS	CP025330	3877231	3876905	-1	-	327	Hypothetical protein	- none -
Hypothetical	fig|273384.26.peg.3480	CXR23_18450	10	CXR23	4008261	CDS	CP025330	4008261	4008593	3	+	333	Hypothetical protein	- none -
Hypothetical	fig|273384.26.peg.3549	CXR23_18800	10	CXR23	4092723	CDS	CP025330	4092723	4093169	3	+	447	Hypothetical protein	- none -
Hypothetical	fig|273384.22.peg.355	CXR24_01870	3	CXR24	406916	CDS	CP025331	406916	407125	2	+	210	Hypothetical protein	- none -
Hypothetical	fig|273384.22.peg.416	CXR24_02180	3	CXR24	478044	CDS	CP025331	478823	478044	-2	-	780	Hypothetical protein	- none -
Hypothetical	fig|273384.22.peg.472	CXR24_02470	3	CXR24	545933	CDS	CP025331	548344	545933	-1	-	2412	Hypothetical protein	- none -
Hypothetical	fig|273384.22.peg.473	CXR24_02475	3	CXR24	548619	CDS	CP025331	548619	553166	3	+	4548	Hypothetical protein	- none -
Hypothetical	fig|273384.22.peg.497	CXR24_02610	3	CXR24	588522	CDS	CP025331	589517	588522	-2	-	996	Hypothetical protein	- none -
Hypothetical	fig|273384.22.peg.499	CXR24_02620	3	CXR24	591089	CDS	CP025331	591592	591089	-1	-	504	Hypothetical protein	- none -
Hypothetical	fig|273384.22.peg.503	CXR24_02645	3	CXR24	599276	CDS	CP025331	599518	599276	-1	-	243	Hypothetical protein	- none -
Hypothetical	fig|273384.22.peg.507	CXR24_02665	3	CXR24	604005	CDS	CP025331	604005	604532	3	+	528	Hypothetical protein	- none -
Hypothetical	fig|273384.22.peg.508	CXR24_02670	3	CXR24	604529	CDS	CP025331	604529	605173	2	+	645	Hypothetical protein	- none -
Hypothetical	fig|273384.22.peg.509	CXR24_02675	3	CXR24	605245	CDS	CP025331	605245	605454	1	+	210	Hypothetical protein	- none -
Hypothetical	fig|273384.22.peg.515	CXR24_02705	3	CXR24	612542	CDS	CP025331	612542	613240	2	+	699	Hypothetical protein	- none -
Hypothetical	fig|273384.22.peg.809	CXR24_04240	3	CXR24	951042	CDS	CP025331	951042	951200	3	+	159	Hypothetical protein	- none -
Hypothetical	fig|273384.22.peg.1489	CXR24_07810	3	CXR24	1705824	CDS	CP025331	1706039	1705824	-2	-	216	Hypothetical protein	- none -
Hypothetical	fig|273384.22.peg.1569	CXR24_08235	3	CXR24	1780066	CDS	CP025331	1780500	1780066	-3	-	435	Hypothetical protein	- none -
Hypothetical	fig|273384.22.peg.1710	CXR24_08970	3	CXR24	1934239	CDS	CP025331	1934523	1934239	-3	-	285	Hypothetical protein	- none -
Hypothetical	fig|273384.22.peg.2274	CXR24_11950	3	CXR24	2591887	CDS	CP025331	2592573	2591887	-3	-	687	Hypothetical protein	- none -
Hypothetical	fig|273384.22.peg.2293	CXR24_12055	3	CXR24	2626579	CDS	CP025331	2626758	2626579	-3	-	180	Hypothetical protein	- none -
Hypothetical	fig|273384.22.peg.2294	CXR24_12060	3	CXR24	2626872	CDS	CP025331	2626872	2627060	3	+	189	Hypothetical protein	- none -
Hypothetical	fig|273384.22.peg.2812	CXR24_14745	3	CXR24	3218825	CDS	CP025331	3219103	3218825	-1	-	279	Hypothetical protein	- none -
Hypothetical	fig|273384.22.peg.2814	CXR24_14755	3	CXR24	3219747	CDS	CP025331	3219977	3219747	-2	-	231	Hypothetical protein	- none -
Hypothetical	fig|273384.22.peg.3194	CXR24_16735	3	CXR24	3651946	CDS	CP025331	3651946	3653295	1	+	1350	Hypothetical protein	- none -
Hypothetical	fig|273384.22.peg.3274	CXR24_17140	3	CXR24	3750744	CDS	CP025331	3750744	3751262	3	+	519	Hypothetical protein	- none -
Hypothetical	fig|273384.22.peg.3312	CXR24_17360	3	CXR24	3799369	CDS	CP025331	3800463	3799369	-3	-	1095	Hypothetical protein	- none -
Hypothetical	fig|273384.22.peg.3533	CXR24_18490	3	CXR24	4057060	CDS	CP025331	4057060	4058775	1	+	1716	Hypothetical protein	- none -
Hypothetical	fig|273384.20.peg.215	CXR25_01135	7	CXR25	235925	CDS	CP025333	236239	235925	-1	-	315	Hypothetical protein	- none -
Hypothetical	fig|273384.20.peg.216	CXR25_01140	7	CXR25	236289	CDS	CP025333	236501	236289	-2	-	213	Hypothetical protein	- none -
Hypothetical	fig|273384.20.peg.219	CXR25_01155	7	CXR25	239491	CDS	CP025333	239491	239985	1	+	495	Hypothetical protein	- none -
Hypothetical	fig|273384.20.peg.306	CXR25_01620	7	CXR25	342035	CDS	CP025333	342292	342035	-1	-	258	Hypothetical protein	- none -
Hypothetical	fig|273384.20.peg.467	CXR25_02430	7	CXR25	531369	CDS	CP025333	531369	532247	3	+	879	Hypothetical protein	- none -
Hypothetical	fig|273384.20.peg.468	CXR25_02435	7	CXR25	532702	CDS	CP025333	532702	534609	1	+	1908	Hypothetical protein	- none -
Hypothetical	fig|273384.20.peg.470	CXR25_02445	7	CXR25	537448	CDS	CP025333	537448	539502	1	+	2055	Hypothetical protein	- none -
Hypothetical	fig|273384.20.peg.473	CXR25_02465	7	CXR25	543841	CDS	CP025333	545238	543841	-3	-	1398	Hypothetical protein	- none -
Hypothetical	fig|273384.20.peg.683	CXR25_03590	7	CXR25	782046	CDS	CP025333	782369	782046	-2	-	324	Hypothetical protein	- none -
Hypothetical	fig|273384.20.peg.690	CXR25_03625	7	CXR25	789123	CDS	CP025333	789770	789123	-2	-	648	Hypothetical protein	- none -
Hypothetical	fig|273384.20.peg.1059	CXR25_05580	7	CXR25	1199118	CDS	CP025333	1199118	1199297	3	+	180	Hypothetical protein	- none -
Hypothetical	fig|273384.20.peg.1065	CXR25_05615	7	CXR25	1207007	CDS	CP025333	1207007	1207117	2	+	111	Hypothetical protein	- none -
Hypothetical	fig|273384.20.peg.1759	CXR25_09205	7	CXR25	1971383	CDS	CP025333	1971940	1971383	-1	-	558	Hypothetical protein	- none -
Hypothetical	fig|273384.20.peg.1760	CXR25_09210	7	CXR25	1972210	CDS	CP025333	1973157	1972210	-3	-	948	Hypothetical protein	- none -
Hypothetical	fig|273384.20.peg.2238	CXR25_11725	7	CXR25	2526249	CDS	CP025333	2526249	2526545	3	+	297	Hypothetical protein	- none -
Hypothetical	fig|273384.20.peg.2246	CXR25_11765	7	CXR25	2542429	CDS	CP025333	2543049	2542429	-3	-	621	Hypothetical protein	- none -
Hypothetical	fig|273384.20.peg.2254	CXR25_11815	7	CXR25	2553762	CDS	CP025333	2553762	2553992	3	+	231	Hypothetical protein	- none -
Hypothetical	fig|273384.20.peg.2612	CXR25_13680	7	CXR25	2954853	CDS	CP025333	2955548	2954853	-2	-	696	Hypothetical protein	- none -
Hypothetical	fig|273384.20.peg.2613	CXR25_13685	7	CXR25	2955653	CDS	CP025333	2955653	2955859	2	+	207	Hypothetical protein	- none -
Hypothetical	fig|273384.20.peg.2614	CXR25_13690	7	CXR25	2955852	CDS	CP025333	2955852	2956079	3	+	228	Hypothetical protein	- none -
Hypothetical	fig|273384.20.peg.2615	CXR25_13695	7	CXR25	2956268	CDS	CP025333	2956268	2956744	2	+	477	Hypothetical protein	- none -
Hypothetical	fig|273384.20.peg.2616	CXR25_13700	7	CXR25	2956741	CDS	CP025333	2956741	2957133	1	+	393	Hypothetical protein	- none -
Hypothetical	fig|273384.20.peg.2617	CXR25_13705	7	CXR25	2957309	CDS	CP025333	2957309	2957542	2	+	234	Hypothetical protein	- none -
Hypothetical	fig|273384.20.peg.2618	CXR25_13710	7	CXR25	2957544	CDS	CP025333	2957544	2957876	3	+	333	Hypothetical protein	- none -
Hypothetical	fig|273384.20.peg.2619	CXR25_13715	7	CXR25	2957869	CDS	CP025333	2957869	2958225	1	+	357	Hypothetical protein	- none -
Hypothetical	fig|273384.20.peg.2621	CXR25_13725	7	CXR25	2960129	CDS	CP025333	2960129	2960446	2	+	318	Hypothetical protein	- none -
Hypothetical	fig|273384.20.peg.2622	CXR25_13730	7	CXR25	2960863	CDS	CP025333	2960863	2961330	1	+	468	Hypothetical protein	- none -
Hypothetical	fig|273384.20.peg.2624	CXR25_13740	7	CXR25	2961834	CDS	CP025333	2961834	2962145	3	+	312	Hypothetical protein	- none -
Hypothetical	fig|273384.20.peg.2625	CXR25_13745	7	CXR25	2962168	CDS	CP025333	2962168	2962407	1	+	240	Hypothetical protein	- none -
Hypothetical	fig|273384.20.peg.2626	CXR25_13750	7	CXR25	2962434	CDS	CP025333	2962434	2963171	3	+	738	Hypothetical protein	- none -
Hypothetical	fig|273384.20.peg.2628	CXR25_13760	7	CXR25	2965820	CDS	CP025333	2966365	2965820	-1	-	546	Hypothetical protein	- none -
Hypothetical	fig|273384.20.peg.2631	CXR25_13780	7	CXR25	2969606	CDS	CP025333	2969606	2970448	2	+	843	Hypothetical protein	- none -
Hypothetical	fig|273384.20.peg.2633	CXR25_13790	7	CXR25	2971021	CDS	CP025333	2971296	2971021	-3	-	276	Hypothetical protein	- none -
Hypothetical	fig|273384.20.peg.2634	CXR25_13795	7	CXR25	2971305	CDS	CP025333	2971305	2971841	3	+	537	Hypothetical protein	- none -
Hypothetical	fig|273384.20.peg.2635	CXR25_13800	7	CXR25	2972249	CDS	CP025333	2972443	2972249	-1	-	195	Hypothetical protein	- none -
Hypothetical	fig|273384.20.peg.2636	CXR25_13805	7	CXR25	2972445	CDS	CP025333	2972798	2972445	-2	-	354	Hypothetical protein	- none -
Hypothetical	fig|273384.20.peg.2637	CXR25_13810	7	CXR25	2972802	CDS	CP025333	2973836	2972802	-2	-	1035	Hypothetical protein	- none -
Hypothetical	fig|273384.20.peg.2639	CXR25_13820	7	CXR25	2974618	CDS	CP025333	2974863	2974618	-3	-	246	Hypothetical protein	- none -
Hypothetical	fig|273384.20.peg.2641	CXR25_13830	7	CXR25	2975755	CDS	CP025333	2979249	2975755	-3	-	3495	Hypothetical protein	- none -
Hypothetical	fig|273384.20.peg.2642	CXR25_13835	7	CXR25	2979246	CDS	CP025333	2980343	2979246	-2	-	1098	Hypothetical protein	- none -
Hypothetical	fig|273384.20.peg.2643	CXR25_13840	7	CXR25	2980352	CDS	CP025333	2981404	2980352	-1	-	1053	Hypothetical protein	- none -
Hypothetical	fig|273384.20.peg.2644	CXR25_13845	7	CXR25	2981407	CDS	CP025333	2982288	2981407	-3	-	882	Hypothetical protein	- none -
Hypothetical	fig|273384.20.peg.2646	CXR25_13855	7	CXR25	2987463	CDS	CP025333	2987723	2987463	-2	-	261	Hypothetical protein	- none -
Hypothetical	fig|273384.20.peg.2647	CXR25_13860	7	CXR25	2987768	CDS	CP025333	2988415	2987768	-1	-	648	Hypothetical protein	- none -
Hypothetical	fig|273384.20.peg.2648	CXR25_13865	7	CXR25	2988515	CDS	CP025333	2989045	2988515	-1	-	531	Hypothetical protein	- none -
Hypothetical	fig|273384.20.peg.2649	CXR25_13870	7	CXR25	2989051	CDS	CP025333	2989245	2989051	-3	-	195	Hypothetical protein	- none -
Hypothetical	fig|273384.20.peg.2650	CXR25_13875	7	CXR25	2989322	CDS	CP025333	2989726	2989322	-1	-	405	Hypothetical protein	- none -
Hypothetical	fig|273384.20.peg.2651	CXR25_13880	7	CXR25	2989726	CDS	CP025333	2990079	2989726	-3	-	354	Hypothetical protein	- none -
Hypothetical	fig|273384.20.peg.2652	CXR25_13885	7	CXR25	2990076	CDS	CP025333	2990525	2990076	-2	-	450	Hypothetical protein	- none -
Hypothetical	fig|273384.20.peg.2653	CXR25_13890	7	CXR25	2990522	CDS	CP025333	2990890	2990522	-1	-	369	Hypothetical protein	- none -
Hypothetical	fig|273384.20.peg.2655	CXR25_13900	7	CXR25	2992073	CDS	CP025333	2992420	2992073	-1	-	348	Hypothetical protein	- none -
Hypothetical	fig|273384.20.peg.2656	CXR25_13905	7	CXR25	2992423	CDS	CP025333	2993610	2992423	-3	-	1188	Hypothetical protein	- none -
Hypothetical	fig|273384.20.peg.2657	CXR25_13910	7	CXR25	2993607	CDS	CP025333	2994665	2993607	-2	-	1059	Hypothetical protein	- none -
Hypothetical	fig|273384.20.peg.2658	CXR25_13915	7	CXR25	2994703	CDS	CP025333	2996253	2994703	-3	-	1551	Hypothetical protein	- none -
Hypothetical	fig|273384.20.peg.2660	CXR25_13925	7	CXR25	2997764	CDS	CP025333	2997970	2997764	-1	-	207	Hypothetical protein	- none -
Hypothetical	fig|273384.20.peg.2661	CXR25_13930	7	CXR25	2998201	CDS	CP025333	2998935	2998201	-3	-	735	Hypothetical protein	- none -
Hypothetical	fig|273384.20.peg.2662	CXR25_13935	7	CXR25	2998928	CDS	CP025333	2999188	2998928	-1	-	261	Hypothetical protein	- none -
Hypothetical	fig|273384.20.peg.2663	CXR25_13940	7	CXR25	2999185	CDS	CP025333	2999481	2999185	-3	-	297	Hypothetical protein	- none -
Hypothetical	fig|273384.20.peg.2664	CXR25_13945	7	CXR25	2999478	CDS	CP025333	2999792	2999478	-2	-	315	Hypothetical protein	- none -
Hypothetical	fig|273384.20.peg.2665	CXR25_13950	7	CXR25	2999789	CDS	CP025333	3000049	2999789	-1	-	261	Hypothetical protein	- none -
Hypothetical	fig|273384.20.peg.2666	CXR25_13955	7	CXR25	3000046	CDS	CP025333	3000672	3000046	-3	-	627	Hypothetical protein	- none -
Hypothetical	fig|273384.20.peg.2667	CXR25_13960	7	CXR25	3000672	CDS	CP025333	3000884	3000672	-2	-	213	Hypothetical protein	- none -
Hypothetical	fig|273384.20.peg.2668	CXR25_13965	7	CXR25	3000970	CDS	CP025333	3000970	3001557	1	+	588	Hypothetical protein	- none -
Hypothetical	fig|273384.20.peg.2669	CXR25_13970	7	CXR25	3001624	CDS	CP025333	3002271	3001624	-3	-	648	Hypothetical protein	- none -
Hypothetical	fig|273384.20.peg.2670	CXR25_13975	7	CXR25	3002360	CDS	CP025333	3002360	3002554	2	+	195	Hypothetical protein	- none -
Hypothetical	fig|273384.20.peg.2671	CXR25_13980	7	CXR25	3002551	CDS	CP025333	3002736	3002551	-3	-	186	Hypothetical protein	- none -
Hypothetical	fig|273384.20.peg.2672	CXR25_13985	7	CXR25	3002891	CDS	CP025333	3003136	3002891	-1	-	246	Hypothetical protein	- none -
Hypothetical	fig|273384.20.peg.2673	CXR25_13990	7	CXR25	3003133	CDS	CP025333	3003417	3003133	-3	-	285	Hypothetical protein	- none -
Hypothetical	fig|273384.20.peg.2674	CXR25_13995	7	CXR25	3003620	CDS	CP025333	3004033	3003620	-1	-	414	Hypothetical protein	- none -
Hypothetical	fig|273384.20.peg.2675	CXR25_14005	7	CXR25	3004938	CDS	CP025333	3005129	3004938	-2	-	192	Hypothetical protein	- none -
Hypothetical	fig|273384.20.peg.2676	CXR25_14010	7	CXR25	3005139	CDS	CP025333	3005522	3005139	-2	-	384	Hypothetical protein	- none -
Hypothetical	fig|273384.20.peg.2677	CXR25_14015	7	CXR25	3005519	CDS	CP025333	3005872	3005519	-1	-	354	Hypothetical protein	- none -
Hypothetical	fig|273384.20.peg.2680	CXR25_14030	7	CXR25	3007805	CDS	CP025333	3008401	3007805	-1	-	597	Hypothetical protein	- none -
Hypothetical	fig|273384.20.peg.2685	CXR25_14055	7	CXR25	3011209	CDS	CP025333	3011394	3011209	-3	-	186	Hypothetical protein	- none -
Hypothetical	fig|273384.20.peg.2686	CXR25_14060	7	CXR25	3011394	CDS	CP025333	3011606	3011394	-2	-	213	Hypothetical protein	- none -
Hypothetical	fig|273384.20.peg.2687	CXR25_14065	7	CXR25	3011603	CDS	CP025333	3011794	3011603	-1	-	192	Hypothetical protein	- none -
Hypothetical	fig|273384.20.peg.2688	CXR25_14070	7	CXR25	3011925	CDS	CP025333	3012191	3011925	-2	-	267	Hypothetical protein	- none -
Hypothetical	fig|273384.20.peg.2690	CXR25_14080	7	CXR25	3013054	CDS	CP025333	3013371	3013054	-3	-	318	Hypothetical protein	- none -
Hypothetical	fig|273384.20.peg.2691	CXR25_14085	7	CXR25	3013513	CDS	CP025333	3013513	3014127	1	+	615	Hypothetical protein	- none -
Hypothetical	fig|273384.20.peg.2692	CXR25_14090	7	CXR25	3014124	CDS	CP025333	3014124	3014780	3	+	657	Hypothetical protein	- none -
Hypothetical	fig|273384.20.peg.2837	CXR25_14820	7	CXR25	3190028	CDS	CP025333	3190666	3190028	-1	-	639	Hypothetical protein	- none -
Hypothetical	fig|273384.20.peg.2863	CXR25_14950	7	CXR25	3224215	CDS	CP025333	3224403	3224215	-3	-	189	Hypothetical protein	- none -
Hypothetical	fig|273384.20.peg.3538	CXR25_18445	7	CXR25	3990718	CDS	CP025333	3990718	3991119	1	+	402	Hypothetical protein	- none -
Hypothetical	fig|273384.21.peg.166	CXR26_00895	4	CXR26	192721	CDS	CP025332	193134	192721	-3	-	414	Hypothetical protein	- none -
Hypothetical	fig|273384.21.peg.241	CXR26_01280	4	CXR26	270559	CDS	CP025332	270559	271329	1	+	771	Hypothetical protein	- none -
Hypothetical	fig|273384.21.peg.249	CXR26_01325	4	CXR26	279326	CDS	CP025332	279326	279526	2	+	201	Hypothetical protein	- none -
Hypothetical	fig|273384.21.peg.424	CXR26_02220	4	CXR26	486921	CDS	CP025332	487412	486921	-2	-	492	Hypothetical protein	- none -
Hypothetical	fig|273384.21.peg.425	CXR26_02225	4	CXR26	487409	CDS	CP025332	488275	487409	-1	-	867	Hypothetical protein	- none -
Hypothetical	fig|273384.21.peg.426	CXR26_02230	4	CXR26	489026	CDS	CP025332	489026	489535	2	+	510	Hypothetical protein	- none -
Hypothetical	fig|273384.21.peg.861	CXR26_04515	4	CXR26	976219	CDS	CP025332	976686	976219	-3	-	468	Hypothetical protein	- none -
Hypothetical	fig|273384.21.peg.862	CXR26_04520	4	CXR26	976688	CDS	CP025332	976688	978013	2	+	1326	Hypothetical protein	- none -
Hypothetical	fig|273384.21.peg.863	CXR26_04525	4	CXR26	978062	CDS	CP025332	978062	981832	2	+	3771	Hypothetical protein	- none -
Hypothetical	fig|273384.21.peg.864	CXR26_04530	4	CXR26	981996	CDS	CP025332	981996	982250	3	+	255	Hypothetical protein	- none -
Hypothetical	fig|273384.21.peg.867	CXR26_04545	4	CXR26	984494	CDS	CP025332	984494	984742	2	+	249	Hypothetical protein	- none -
Hypothetical	fig|273384.21.peg.870	CXR26_04560	4	CXR26	985650	CDS	CP025332	986177	985650	-2	-	528	Hypothetical protein	- none -
Hypothetical	fig|273384.21.peg.1281	CXR26_06725	4	CXR26	1440313	CDS	CP025332	1440663	1440313	-3	-	351	Hypothetical protein	- none -
Hypothetical	fig|273384.21.peg.1644	CXR26_08655	4	CXR26	1843518	CDS	CP025332	1843518	1844183	3	+	666	Hypothetical protein	- none -
Hypothetical	fig|273384.21.peg.2532	CXR26_13300	4	CXR26	2863998	CDS	CP025332	2863998	2865146	3	+	1149	Hypothetical protein	- none -
Hypothetical	fig|273384.21.peg.2535	CXR26_13315	4	CXR26	2868093	CDS	CP025332	2868093	2869460	3	+	1368	Hypothetical protein	- none -
Hypothetical	fig|273384.21.peg.2536	CXR26_13320	4	CXR26	2869769	CDS	CP025332	2870389	2869769	-1	-	621	Hypothetical protein	- none -
Hypothetical	fig|273384.21.peg.2540	CXR26_13340	4	CXR26	2874178	CDS	CP025332	2874783	2874178	-3	-	606	Hypothetical protein	- none -
Hypothetical	fig|273384.21.peg.2542	CXR26_13350	4	CXR26	2876331	CDS	CP025332	2876648	2876331	-2	-	318	Hypothetical protein	- none -
Hypothetical	fig|273384.21.peg.2554	CXR26_13415	4	CXR26	2892884	CDS	CP025332	2894215	2892884	-1	-	1332	Hypothetical protein	- none -
Hypothetical	fig|273384.21.peg.2561	CXR26_13455	4	CXR26	2906145	CDS	CP025332	2906462	2906145	-2	-	318	Hypothetical protein	- none -
Hypothetical	fig|273384.21.peg.2562	CXR26_13460	4	CXR26	2906718	CDS	CP025332	2907245	2906718	-2	-	528	Hypothetical protein	- none -
Hypothetical	fig|273384.21.peg.2563	CXR26_13465	4	CXR26	2907238	CDS	CP025332	2908134	2907238	-3	-	897	Hypothetical protein	- none -
Hypothetical	fig|273384.21.peg.2565	CXR26_13475	4	CXR26	2908740	CDS	CP025332	2908952	2908740	-2	-	213	Hypothetical protein	- none -
Hypothetical	fig|273384.21.peg.2566	CXR26_13480	4	CXR26	2908949	CDS	CP025332	2909323	2908949	-1	-	375	Hypothetical protein	- none -
Hypothetical	fig|273384.21.peg.2567	CXR26_13485	4	CXR26	2909479	CDS	CP025332	2910231	2909479	-3	-	753	Hypothetical protein	- none -
Hypothetical	fig|273384.21.peg.2568	CXR26_13490	4	CXR26	2910883	CDS	CP025332	2910883	2911062	1	+	180	Hypothetical protein	- none -
Hypothetical	fig|273384.21.peg.2963	CXR26_15540	4	CXR26	3360485	CDS	CP025332	3360485	3360961	2	+	477	Hypothetical protein	- none -
Hypothetical	fig|273384.21.peg.2964	CXR26_15545	4	CXR26	3361034	CDS	CP025332	3361034	3361495	2	+	462	Hypothetical protein	- none -
Hypothetical	fig|273384.21.peg.2965	CXR26_15550	4	CXR26	3361496	CDS	CP025332	3361496	3361738	2	+	243	Hypothetical protein	- none -
Hypothetical	fig|273384.21.peg.3049	CXR26_16000	4	CXR26	3452851	CDS	CP025332	3453261	3452851	-3	-	411	Hypothetical protein	- none -
Hypothetical	fig|273384.21.peg.3054	CXR26_16025	4	CXR26	3455718	CDS	CP025332	3455718	3455939	3	+	222	Hypothetical protein	- none -
Hypothetical	fig|273384.21.peg.3147	CXR26_16505	4	CXR26	3566066	CDS	CP025332	3566066	3566479	2	+	414	Hypothetical protein	- none -
Hypothetical	fig|273384.21.peg.3149	CXR26_16515	4	CXR26	3568009	CDS	CP025332	3568009	3568413	1	+	405	Hypothetical protein	- none -
Hypothetical	fig|273384.21.peg.3169	CXR26_16620	4	CXR26	3590217	CDS	CP025332	3590217	3590729	3	+	513	Hypothetical protein	- none -
Hypothetical	fig|273384.25.peg.296	CXR27_01545	5	CXR27	331999	CDS	CP025334	332454	331999	-3	-	456	Hypothetical protein	- none -
Hypothetical	fig|273384.25.peg.369	CXR27_01920	5	CXR27	415206	CDS	CP025334	415868	415206	-2	-	663	Hypothetical protein	- none -
Hypothetical	fig|273384.25.peg.457	CXR27_02370	5	CXR27	519316	CDS	CP025334	519846	519316	-3	-	531	Hypothetical protein	- none -
Hypothetical	fig|273384.25.peg.527	CXR27_02755	5	CXR27	619968	CDS	CP025334	619968	620186	3	+	219	Hypothetical protein	- none -
Hypothetical	fig|273384.25.peg.528	CXR27_02760	5	CXR27	620733	CDS	CP025334	620733	620930	3	+	198	Hypothetical protein	- none -
Hypothetical	fig|273384.25.peg.1058	CXR27_05545	5	CXR27	1221375	CDS	CP025334	1221725	1221375	-2	-	351	Hypothetical protein	- none -
Hypothetical	fig|273384.25.peg.1532	CXR27_08065	5	CXR27	1764252	CDS	CP025334	1764677	1764252	-2	-	426	Hypothetical protein	- none -
Hypothetical	fig|273384.25.peg.1538	CXR27_08095	5	CXR27	1769077	CDS	CP025334	1769400	1769077	-3	-	324	Hypothetical protein	- none -
Hypothetical	fig|273384.25.peg.1540	CXR27_08105	5	CXR27	1770071	CDS	CP025334	1770403	1770071	-1	-	333	Hypothetical protein	- none -
Hypothetical	fig|273384.25.peg.1542	CXR27_08115	5	CXR27	1773422	CDS	CP025334	1773718	1773422	-1	-	297	Hypothetical protein	- none -
Hypothetical	fig|273384.25.peg.1872	CXR27_09870	5	CXR27	2131610	CDS	CP025334	2133052	2131610	-1	-	1443	Hypothetical protein	- none -
Hypothetical	fig|273384.25.peg.2281	CXR27_12010	5	CXR27	2595322	CDS	CP025334	2595579	2595322	-3	-	258	Hypothetical protein	- none -
Hypothetical	fig|273384.25.peg.2285	CXR27_12030	5	CXR27	2599531	CDS	CP025334	2600595	2599531	-3	-	1065	Hypothetical protein	- none -
Hypothetical	fig|273384.25.peg.2289	CXR27_12050	5	CXR27	2603542	CDS	CP025334	2603542	2604330	1	+	789	Hypothetical protein	- none -
Hypothetical	fig|273384.25.peg.2362	CXR27_12455	5	CXR27	2708246	CDS	CP025334	2709391	2708246	-1	-	1146	Hypothetical protein	- none -
Hypothetical	fig|273384.25.peg.2369	CXR27_12495	5	CXR27	2723332	CDS	CP025334	2723332	2724537	1	+	1206	Hypothetical protein	- none -
Hypothetical	fig|273384.25.peg.2370	CXR27_12500	5	CXR27	2724534	CDS	CP025334	2724534	2725256	3	+	723	Hypothetical protein	- none -
Hypothetical	fig|273384.25.peg.2371	CXR27_12505	5	CXR27	2725708	CDS	CP025334	2728113	2725708	-3	-	2406	Hypothetical protein	- none -
Hypothetical	fig|273384.25.peg.2375	CXR27_12525	5	CXR27	2736662	CDS	CP025334	2736662	2737969	2	+	1308	Hypothetical protein	- none -
Hypothetical	fig|273384.25.peg.2382	CXR27_12560	5	CXR27	2747303	CDS	CP025334	2747303	2748130	2	+	828	Hypothetical protein	- none -
Hypothetical	fig|273384.25.peg.2712	CXR27_14295	5	CXR27	3124270	CDS	CP025334	3124270	3124557	1	+	288	Hypothetical protein	- none -
Hypothetical	fig|273384.25.peg.2758	CXR27_14545	5	CXR27	3180296	CDS	CP025334	3180296	3181111	2	+	816	Hypothetical protein	- none -
Hypothetical	fig|273384.25.peg.2761	CXR27_14560	5	CXR27	3185773	CDS	CP025334	3185773	3186408	1	+	636	Hypothetical protein	- none -
Hypothetical	fig|273384.25.peg.2762	CXR27_14565	5	CXR27	3186528	CDS	CP025334	3186528	3187310	3	+	783	Hypothetical protein	- none -
Hypothetical	fig|273384.25.peg.2768	CXR27_14595	5	CXR27	3191083	CDS	CP025334	3191910	3191083	-3	-	828	Hypothetical protein	- none -
Hypothetical	fig|273384.25.peg.2775	CXR27_14630	5	CXR27	3200599	CDS	CP025334	3200829	3200599	-3	-	231	Hypothetical protein	- none -
Hypothetical	fig|273384.25.peg.2778	CXR27_14645	5	CXR27	3202009	CDS	CP025334	3202009	3202317	1	+	309	Hypothetical protein	- none -
Hypothetical	fig|273384.25.peg.2784	CXR27_14685	5	CXR27	3209705	CDS	CP025334	3209705	3209929	2	+	225	Hypothetical protein	- none -
Hypothetical	fig|273384.25.peg.2789	CXR27_14710	5	CXR27	3216553	CDS	CP025334	3216553	3217461	1	+	909	Hypothetical protein	- none -
Hypothetical	fig|273384.25.peg.2791	CXR27_14720	5	CXR27	3218132	CDS	CP025334	3218132	3218557	2	+	426	Hypothetical protein	- none -
Hypothetical	fig|273384.25.peg.2792	CXR27_14725	5	CXR27	3218636	CDS	CP025334	3218636	3219505	2	+	870	Hypothetical protein	- none -
Hypothetical	fig|273384.25.peg.2794	CXR27_14735	5	CXR27	3220655	CDS	CP025334	3220655	3221350	2	+	696	Hypothetical protein	- none -
Hypothetical	fig|273384.25.peg.2800	CXR27_14765	5	CXR27	3226490	CDS	CP025334	3226490	3227272	2	+	783	Hypothetical protein	- none -
Hypothetical	fig|273384.25.peg.2804	CXR27_14785	5	CXR27	3233274	CDS	CP025334	3233274	3233768	3	+	495	Hypothetical protein	- none -
Hypothetical	fig|273384.25.peg.2807	CXR27_14800	5	CXR27	3236122	CDS	CP025334	3236122	3236709	1	+	588	Hypothetical protein	- none -
Hypothetical	fig|273384.25.peg.2995	CXR27_15790	5	CXR27	3458923	CDS	CP025334	3459219	3458923	-3	-	297	Hypothetical protein	- none -
Hypothetical	fig|273384.25.peg.2996	CXR27_15795	5	CXR27	3459256	CDS	CP025334	3459256	3459558	1	+	303	Hypothetical protein	- none -
Hypothetical	fig|273384.25.peg.3662	CXR27_19305	5	CXR27	4239612	CDS	CP025334	4239612	4239923	3	+	312	Hypothetical protein	- none -
Hypothetical	fig|273384.19.peg.3566	BAUR9175_03616	1	BAUR9175	16551	CDS	FXZB01000039	16967	16551	-2	-	417	Hypothetical protein PA1329	- none -
Hypothetical	fig|273384.25.peg.2765	CXR27_14580	5	CXR27	3189039	CDS	CP025334	3189039	3189890	3	+	852	Hypothetical transmembrane protein	- none -
Hypothetical	fig|273384.16.peg.3790	BAURA63_03847	2	BAURA63	3	CDS	FXYZ01000077	3	689	3	+	687	Insertion element conserved Hypothetical protein	- none -
Hypothetical	fig|273384.15.peg.494	BAURA86_00505	6	BAURA86	554014	CDS	FXZI01000001	554727	554014	-3	-	714	ORF55	- none -
Hypothetical	fig|273384.26.peg.2839	CXR23_15085	10	CXR23	3261051	CDS	CP025330	3261389	3261051	-2	-	339	ORF55	- none -
Hypothetical	fig|273384.16.peg.3795	BAURA63_03852	2	BAURA63	3	CDS	FXYZ01000080	230	3	-2	-	228	Protein of unknown function (DUF4231)	- none -
Hypothetical	fig|273384.26.peg.2427	CXR23_12925	10	CXR23	2783963	CDS	CP025330	2783963	2784391	2	+	429	Protein of unknown function DUF1524 RloF	- none -
Hypothetical	fig|273384.25.peg.2381	CXR27_12555	5	CXR27	2743264	CDS	CP025334	2745363	2743264	-3	-	2100	Protein of unknown function DUF1524 RloF	- none -
Hypothetical	fig|1703.41.peg.1324	BLSMQ_RS06870	0	BLSMQ	1492361	CDS	NZ_CP017150	1492732	1492361	-1	-	372	Protein of unknown function DUF1696	- none -
Hypothetical	fig|273384.26.peg.3352	CXR23_17750	10	CXR23	3847621	CDS	CP025330	3847621	3848211	1	+	591	Protein of unknown function DUF305	- none -
Hypothetical	fig|273384.20.peg.2693	CXR25_14095	7	CXR25	3015046	CDS	CP025333	3015046	3015378	1	+	333	Protein of unknown function DUF955	- none -
Hypothetical	fig|273384.26.peg.3378	CXR23_17890	10	CXR23	3874734	CDS	CP025330	3874734	3876719	3	+	1986	SCE2.16, unknown, len: 706aa	- none -
Hypothetical	fig|273384.22.peg.517	CXR24_02715	3	CXR24	615355	CDS	CP025331	615355	617496	1	+	2142	SCE2.16, unknown, len: 706aa	- none -
Hypothetical	fig|273384.15.peg.1369	BAURA86_01390	6	BAURA86	338541	CDS	FXZI01000003	338906	338541	-2	-	366	SCP1.182, unknown, len: 251aa	- none -
Hypothetical	fig|273384.19.peg.3526	BAUR9175_03576	1	BAUR9175	23326	CDS	FXZB01000037	23326	23688	1	+	363	Unknown	- none -
Hypothetical	fig|273384.19.peg.2910	BAUR9175_02949	1	BAUR9175	78950	CDS	FXZB01000021	78950	80554	2	+	1605	Unknown	- none -
Hypothetical	fig|273384.17.peg.1656	BAUR920_01684	8	BAUR920	90591	CDS	FXZG01000008	90591	91445	3	+	855	Unknown	- none -
Iron acquisition and metabolism	fig|273384.16.peg.3615	BAURA63_03667	2	BAURA63	1482	CDS	FXYZ01000035	2942	1482	-2	-	1461	Ferric iron ABC transporter, ATP-binding protein	- none -
[truncated: 525 more rows]
